# Supplementary material for: Time-course RNA-seq analysis reveals stage-specific and melatonin-triggered gene expression patterns during the hair follicle growth cycle in Capra hircus
Source: BMC Genomics. 2022 Feb 16;23:140. doi: 10.1186/s12864-022-08331-z (PMC8848980; doi:10.1186/s12864-022-08331-z)
Supplement: Supplementary file 3 — Additional file 3. Differentially expressed genes in the control group. [file 12864_2022_8331_MOESM3_ESM.csv]

	baseMean	log2FoldChange	lfcSE	stat	pvalue	padj
A1BG	69.5374849724739	1.04472158728974	0.40856504449945	8.87488786242261	0.633439631177869	0.792940800733281
A2ML1	14.1536606264425	1.88879448487244	0.821850437798375	13.0547055148662	0.28976493150019	0.464846624585774
A3GALT2	44.4869450557959	1.28837080579793	0.381876797296582	21.6104860340569	0.0275705762569654	0.0740791493534599
A4GALT	81.0482223240038	0.953210809699984	0.314990377877968	16.1997887972611	0.133874367895918	0.261556737974871
AAAS	559.93178713265	0.808666348006139	0.186489381879771	41.891658512065	1.69116055298229e-05	0.000127193706539903
AACS	1690.04382157659	0.83407989907143	0.1367687807144	59.3260618419276	1.23665853892067e-08	2.20703568651131e-07
AADACL3	445.762526489354	2.551381929294	0.716054049479458	20.9960721166223	0.0334117713377487	0.0869785246362142
AADAT	497.924860839524	1.04544985163162	0.296816832196393	18.4725667767915	0.0712434661079953	0.159349055517419
AAED1	539.402015559064	0.931134371798235	0.227460703465459	28.4211824530225	0.00278931616581905	0.0108288885212116
AAGAB	1068.36396832587	0.207679474988948	0.0853699028046751	18.4723472969044	0.0712479845727542	0.159349055517419
AAK1	645.19283386407	0.533846399930787	0.299002227705551	12.561745755129	0.322931133000214	0.50315027828807
AAMDC	547.646505058502	0.82073676546307	0.185046538702962	24.7329475491989	0.00997327412365624	0.0318162603416006
AAMP	1996.49531355518	0.533967583707001	0.12897300006726	17.5288876556603	0.0931756498432103	0.197329847455418
AANAT	2.05841570305841	3.05803144570486	1.82191682633433	14.5137461860251	0.205857091571201	0.362317831766957
AAR2	537.355959341348	0.604822171276647	0.132971992037748	28.2036073832209	0.00301273434619367	0.0115824431103713
AARD	26.236184239025	3.85736648593123	0.652191537532769	64.9691683064537	1.09211352297281e-09	2.55574859168166e-08
AARS	2815.56603905933	0.531672061328068	0.138003527650261	15.0962231881689	0.178134036863827	0.324346892171449
AARS2	276.176919157445	0.384001959443661	0.187463898251153	8.83559776105847	0.637064317210069	0.79594524260344
AASDH	565.915717881155	0.549915074054789	0.159587708942828	24.6110420938918	0.010389175277962	0.0329241102037835
AASDHPPT	2006.49069065191	0.40686783835108	0.122189243269279	23.5843593891381	0.014603977080277	0.0436840163584474
AASS	1781.99791220102	0.468832351537308	0.158536032600005	15.9771937572033	0.141979668154315	0.273467960390144
AATF	592.297616918998	0.291358768860066	0.127589018892006	8.55183868346563	0.663182912588561	0.815564493606212
AATK	534.142346945133	1.34461213321892	0.296869579696242	46.4789342742752	2.66029435202618e-06	2.50829531581542e-05
ABAT	77.2810514984652	0.967955849362449	0.350945705196737	9.56562185271787	0.569829902352183	0.741890844048471
ABCA1	3771.54048329787	0.680979664010779	0.218984083046784	32.9368426196235	0.000538704232838291	0.00261235898615132
ABCA10	1791.73065968988	1.69604831326234	0.260739466261112	80.9659798871168	9.59588378049061e-13	4.41432562313026e-11
ABCA12	2530.07964224165	0.563967684446689	0.184562312732181	12.830295970452	0.304561799644666	0.482286678799149
ABCA13	10.9338121503039	2.70030793695123	1.15379294543645	15.6749837668002	0.153632296980063	0.290379777770564
ABCA2	575.930691607598	0.659812795967863	0.281579167473389	6.25408484105634	0.855884317097195	0.94276954334827
ABCA3	248.763667622378	0.730867564097349	0.239668984726453	15.7496455685199	0.150682619964126	0.286047117925116
ABCA5	2321.64781817793	1.16444436713412	0.215227235693539	41.4255523590269	2.03565069856062e-05	0.000149913471949188
ABCA6	1168.6877528884	1.69907684090314	0.24469100374569	79.1864319083882	2.11947130440423e-12	9.02858928381412e-11
ABCA7	148.918261353921	0.922825172031358	0.24964134960581	24.7314815989679	0.00997818036440996	0.0318268729084211
ABCB1	230.671628592684	1.35354244740611	0.303568244050798	26.9663178612087	0.00464936583314011	0.0167166438565204
ABCB10	1001.12278680463	0.362714329561128	0.154506923122321	11.0592137999605	0.438315949032437	0.622778933576939
ABCB6	881.062642386314	0.435021438648129	0.136186163118338	18.6877894601151	0.0669332296699446	0.151873608628346
ABCB7	842.079210411263	0.644953612703399	0.119331662256341	51.448404002296	3.4309347363105e-07	4.11362773415506e-06
ABCB8	1050.13624221265	0.921481237656559	0.194136905412193	25.6372810168008	0.00734604502862795	0.0245624523098604
ABCB9	355.966261157385	0.887338872383374	0.178112223424454	24.3638640982567	0.0112834145112657	0.0352917601657084
ABCC1	1158.79928908545	0.33759876032421	0.167201893939457	12.0720655767657	0.358250740834249	0.54102789514835
ABCC10	441.058361795059	0.648172881060019	0.183324860712316	19.9093565791738	0.0465993738148002	0.113470772026808
ABCC11	2921.08741243192	3.67688802110984	0.550037217103168	115.950398037473	1.17993291694001e-19	1.56410975943581e-17
ABCC3	1232.09149076556	0.466294246452491	0.125042354105021	31.6274896291261	0.000875041616020004	0.00398175553775679
ABCC4	1182.3927014064	1.90086507247274	0.222170786455704	218.745378002164	9.42649388601094e-41	1.89934425309235e-37
ABCC5	1231.59554124552	0.550735372511621	0.159251439950351	24.8968972751805	0.00943877007648968	0.0303707726399218
ABCC8	77.7425898209146	1.58730851468739	0.391529780338815	35.3038186398843	0.000220764943469906	0.00120514571822681
ABCC9	380.525486878356	1.59975230571201	0.339437109004173	32.766111664331	0.000574083373030068	0.00276528947721321
ABCD1	419.091728718814	0.905583929848687	0.222949814735549	23.3439293047689	0.0158012824315689	0.0466490900679388
ABCD3	2456.69406875233	0.553783165880053	0.170955163008813	18.3407422946344	0.0740035565583799	0.164290178613353
ABCD4	604.641249568513	0.339286013946351	0.144687941856853	7.64308011375772	0.744874363352304	0.871975401386973
ABCE1	3071.81986561729	0.66449482744857	0.13987129234569	49.1095991171721	9.04318143209236e-07	9.63246147941003e-06
ABCF2	889.469397345443	0.51461745070357	0.128302319663248	43.5756607392517	8.62023051684524e-06	7.04620789792757e-05
ABCF3	1436.76705596262	0.278669905972422	0.103879120620026	12.0496175351636	0.359925210821683	0.542864965405052
ABCG1	923.44605529951	1.44781078460194	0.292512954991241	29.5893953350288	0.00183755251753633	0.00753763144866439
ABCG2	358.745428484271	1.16920551975584	0.231773440580772	58.8467898977931	1.51722885427675e-08	2.65140018949022e-07
ABCG5	3.13795638235335	2.6628682559335	1.71952628003455	8.12059997299838	0.702461648595156	0.843331040488171
ABCG8	23.4224492909059	2.36505249765798	0.619196799473152	32.1637199523504	0.000717924731399295	0.0033601545674714
ABHD1	140.883627141253	0.342480196475713	0.307378366812272	6.41763367467439	0.844097315649719	0.935723856350472
ABHD11	531.693103961748	0.609930635911487	0.179948677952836	17.653786613515	0.0899694963559363	0.191749035548526
ABHD12	2157.99385885573	0.45175579604437	0.167672474388534	16.4062399215784	0.126706794429931	0.250467497397104
ABHD12B	295.886829329107	1.30895357102979	0.301070680232259	23.5289087078309	0.0148722899307311	0.0443746142180217
ABHD13	1712.50435744902	0.450620133699206	0.140225967792202	23.6350355403121	0.01436275770474	0.0430583551544125
ABHD14A	168.178056124643	0.990661512992076	0.233897656180944	33.9951995481588	0.000362345239225212	0.00185207869739949
ABHD14B	1836.97088303016	0.370366427063408	0.130520992604785	22.2454606597889	0.0225391123707017	0.0625882821330303
ABHD15	68.4440655140849	1.34270290211235	0.333309573678436	20.3101716478899	0.0412640187811285	0.102925069871374
ABHD16A	1148.51329443641	0.33570785087258	0.114527638337451	26.0380773579629	0.00640577849903131	0.0218762764367766
ABHD17A	1171.338385417	0.779022934992429	0.14553785723907	26.8939342587019	0.00476777860195811	0.017051113072569
ABHD17B	990.796090323271	0.597760452798676	0.178048143200163	26.1257960397179	0.00621589246004001	0.0213106476023896
ABHD17C	721.184484613302	0.536285347103492	0.12446841660327	42.2802234885377	1.44842816125819e-05	0.000110840786255949
ABHD18	437.189723759528	0.801436940756834	0.270343414929635	9.18034787945226	0.605249548765115	0.771115799511809
ABHD2	865.647803451057	0.656571501565332	0.206163332705536	14.7610016238281	0.193701928627892	0.34537918156292
ABHD3	472.917999117956	0.203868253012139	0.202025270250063	2.76546811517323	0.993476337596752	0.99999999313501
ABHD4	811.561121309683	0.318781799595503	0.174804941567426	4.27830161984861	0.961057619897205	0.997699519980873
ABHD5	4252.24861636584	0.965873179774913	0.196871963957687	37.9046893893825	8.11873593455242e-05	0.000502717917471717
ABHD6	316.883247709622	0.931585813450586	0.202249658763491	20.9327646521356	0.0340743621538026	0.0884300667283374
ABHD8	312.643511029648	0.689442583822682	0.221264444335861	21.8088878692754	0.0258963252327364	0.0704829200478734
ABI1	3053.18885439059	0.390002547707316	0.113637302341818	17.3025855992663	0.0992383524295211	0.207940262385859
ABI2	67.5858776207405	0.697047303925647	0.465071046582422	4.47122401490981	0.954055679965945	0.994709014759691
ABI3	87.6968606640897	1.00846974474012	0.334298969489161	32.0897952856681	0.000737828910456874	0.00344211963806334
ABI3BP	3198.64745905791	0.823004063425862	0.181113375484104	23.3877181327302	0.0155765657309265	0.0461140497961267
ABL1	2294.38137848919	0.280206591884723	0.151147847618342	9.26914068752484	0.597064613154191	0.764068268684903
ABL2	423.687736702328	0.947474481209509	0.391132745191875	3.8776094862377	0.973361306100137	0.99999999313501
ABLIM1	7834.04780883004	0.429100779029011	0.0874265254303277	35.8496658594091	0.00017925630745131	0.00100245221727351
ABLIM2	355.33728398271	1.08078201724157	0.24339815611717	36.8164102910338	0.000123683684124021	0.000725714196684593
ABLIM3	354.100958743395	0.615849251146259	0.153014821893619	35.3653579018324	0.000215651286225537	0.00118220965999955
ABR	3177.52600013057	0.350802857812026	0.118641412260165	20.2721746575298	0.0417447907440916	0.1037471118108
ABRACL	931.190804618166	0.978307684259669	0.212844718149603	38.8988352945859	5.51117333677638e-05	0.000358555478084298
ABT1	1056.44365277005	0.387177294646815	0.172585098231585	5.46670759894653	0.906478474490219	0.971471452715463
ABTB1	1725.28949330136	0.502331156438025	0.196671810318684	7.23736404464654	0.77954836355092	0.895349710835517
ABTB2	1025.38950148333	0.590453326803872	0.174190601835935	23.7356441262979	0.0138949347454828	0.0418522145684123
ACAA1	2036.18358590114	0.483601630583733	0.170493927940712	13.2716722569396	0.275940557870073	0.449250670695225
ACAA2	2482.81059023666	0.581372398012289	0.276994504867389	5.58154455277861	0.899776762901201	0.968151340152532
ACACA	2653.69884838652	0.559273175431859	0.21184435269241	17.9719539114442	0.0822336677376817	0.178259943114206
ACACB	134.266435321771	1.36504135646375	0.385830094678888	34.2897970086792	0.000324256761740396	0.00168171158103147
ACAD11	531.266102085855	0.499040155340568	0.147776440143093	17.306819122932	0.0991218726627918	0.207739402151299
ACAD8	1079.16546167524	0.755918608486865	0.172744105781169	31.8042307507409	0.000819882345164886	0.00376734535295947
ACAD9	3201.24843115704	0.582819737173842	0.166499557535124	26.1660963337418	0.00613046667173593	0.0210717797626761
ACADL	473.672450133037	1.27390096672981	0.352261705403934	41.560275572297	1.92953464098763e-05	0.000142987103645678
ACADS	529.783970208641	0.668211738650043	0.219719807736662	8.17540059935914	0.697510862944281	0.839855765355821
ACADSB	823.008442623633	2.66841071000302	0.405999903010163	125.973760400241	1.13384777403532e-21	2.05818908099438e-19
ACADVL	3102.10749629228	0.327211982232996	0.123917107658534	13.0043558634807	0.293040807431546	0.468423580241033
ACAP1	1205.54534896921	0.673788401695116	0.487780977615363	2.43717979660335	0.996274590525564	0.99999999313501
ACAP2	1308.44158116864	0.639157185040918	0.268367170225236	11.7316936261994	0.384145163724577	0.568250561918105
ACAP3	1304.20772579482	0.686818352072234	0.17429042105656	44.7022154203332	5.47349982228896e-06	4.71708930364843e-05
ACAT1	3602.02619723657	0.657716973805241	0.222499977852707	13.3378594321681	0.271817764880162	0.444369666902263
ACAT2	1060.06718985994	0.56080830317166	0.192323063888933	23.2188009824072	0.0164603227182452	0.0483467991909508
ACBD3	1969.07580477275	0.154409428851542	0.0801419193550035	10.9318950299353	0.448986454183053	0.633206975945568
ACBD4	478.164348660505	0.757576225992208	0.193795841092292	24.1018257900768	0.0123106751575874	0.0378583323794612
ACBD5	1402.98227048615	0.356415874517824	0.175680998310652	4.51147936888032	0.9525043116738	0.99416594001874
ACBD6	366.242022334301	0.558328388774415	0.149331185168988	23.5280089612343	0.0148766815958415	0.0443811456136526
ACCS	313.899087367411	1.00435062110391	0.310411091906872	19.2269141494499	0.0571399732441949	0.133764763668791
ACCSL	6.15798048051973	2.70679847311018	1.18857943816816	26.4764329066626	0.00550919872754846	0.0192616424017654
ACD	463.901802513018	0.430560618722116	0.18333432053534	11.2516688869288	0.42242657577271	0.606965205394305
ACE2	292.026663543326	1.43656481368702	0.364784127398433	27.8848007803446	0.00337147413169472	0.0127427935245764
ACER1	1529.25529652102	1.12053000875897	0.234172489797508	45.8724973068294	3.40547193674081e-06	3.10905546231947e-05
ACER2	269.395042990751	0.548070977434913	0.207762352019498	6.84402372525324	0.81157041539192	0.916586327708505
ACER3	949.729473158362	0.948704541336455	0.181530736778992	51.8076472273437	2.95410606957642e-07	3.61837587816993e-06
ACHE	317.797784794328	1.24885972862394	0.305690620093379	48.6320091753097	1.10100467870871e-06	1.1500333473977e-05
ACIN1	6481.3297906486	0.377304335185468	0.150285572320789	5.43035204957255	0.908549434256125	0.972449537892519
ACKR1	92.9500270569992	2.39635157267887	0.520414508538472	27.8850002594797	0.00337123731764238	0.0127427935245764
ACKR3	1027.80613339233	1.20409101922147	0.24490785663535	64.7731597652447	1.18883429362465e-09	2.75015180048715e-08
ACKR4	328.139178451441	1.84898509531343	0.543682963329745	28.6473834359476	0.00257399504807318	0.0101109898446821
ACLY	4390.07645256843	0.418990363704568	0.0984744324021917	27.6498259599892	0.00366181938909767	0.0136532196282252
ACMSD	6.98558955768563	1.75597816786399	0.876702061237018	4.60994549941915	0.948577232015761	0.992052457587749
ACO1	1553.62254256317	0.655094235565208	0.147420739551181	31.3151687266463	0.00098145636506407	0.0044052938961185
ACO2	2317.65855838648	0.581682767544021	0.106399634236712	40.7376177678408	2.67386550781089e-05	0.000190239110582209
ACOT11	40.1540435859793	1.02111707729662	0.484144555467419	6.88855220436295	0.808035596775938	0.914206818992553
ACOT12	29.3871810385156	1.02147050268363	0.507185693724841	9.27290630765219	0.59671770688738	0.763866904451957
ACOT6	200.586831189043	0.789041225726968	0.218244769980187	22.9640311865141	0.017882703526682	0.0517922370790738
ACOT7	1102.53066554562	0.738985037483179	0.174881623225284	38.2151098446126	7.19578321060149e-05	0.000452521335550591
ACOT8	430.679227147358	0.829122148153128	0.182140102201037	26.7421296485294	0.00502556859160464	0.0177930384031351
ACOT9	856.44885115502	0.342260704088097	0.12379656571282	12.2685874243772	0.343796778143795	0.525501538675415
ACOX1	3319.68206521667	0.348636975267717	0.0993459024284588	23.7241129499803	0.0139478163043145	0.0419767812868758
ACOX2	332.440749585712	1.13713074870342	0.312068877178973	33.9703864875074	0.000365745843755742	0.00186696963446208
ACOX3	1514.92603846784	0.3546815942784	0.118675058615319	13.9517556430393	0.235674545054579	0.400017387608854
ACOXL	8.65142961481744	2.28959341920842	0.764508081506569	16.9017081651993	0.110816846909462	0.226108665907102
ACP1	1517.10502033949	0.544572119585855	0.131659697461859	31.0764451434933	0.00107116803050134	0.0047362222178125
ACP2	455.165140303805	0.922867976330358	0.287633081751186	16.817262377334	0.113398333700685	0.229865495546791
ACP5	963.195779885871	0.68595059037577	0.231196224979779	12.1109252296839	0.355363373875892	0.538200287148627
ACP6	566.453815217879	1.12971987772398	0.215373913941502	26.9385641027529	0.00469443139518854	0.016853562266964
ACP7	1718.21012343633	1.39337705695658	0.275262288337816	27.9531014140871	0.00329131833518304	0.012484866975547
ACPP	1114.63827956132	0.607930612068435	0.175057142935043	21.2653150287038	0.0307242157072331	0.0810503040436031
ACRBP	16.3507259965645	1.50076022341534	0.490477260152421	17.4032649490149	0.0965001608412428	0.203174685558015
ACRC	595.912108005213	1.24050255138596	0.218243283681473	41.4011414954846	2.05548425000847e-05	0.00015104459078638
ACSBG1	7036.96793310665	1.14211875463483	0.339555707865156	17.8790315202471	0.0844302870787064	0.18208696434982
ACSBG2	52.742934083492	1.13678960478194	0.395037525114454	21.1329201023221	0.0320198213094328	0.0839405906276035
ACSF2	1766.34519067024	1.00502271591927	0.132930707179148	145.506239474039	1.23174093412409e-25	3.49554198333328e-23
ACSF3	363.623441075191	0.82296838400273	0.207702010498044	23.8110100594201	0.0135539343348498	0.0409319878466561
ACSL1	6170.2176499696	0.850520254993116	0.169647170362606	47.7757039137949	1.56531310222707e-06	1.57069191716999e-05
ACSL3	3539.35709978649	0.578355186317615	0.120795752634481	53.5078833557595	1.45115119902769e-07	1.93894200989449e-06
ACSL4	1714.87370314617	0.686014043358181	0.211185184281687	22.8341021271403	0.0186516939589836	0.0535727700042138
ACSL5	2798.56854197639	1.46648878049455	0.27191158697928	40.9207901855116	2.4868623024524e-05	0.000178129358450457
ACSM1	94.2033081256839	2.18617227474505	0.504093087000935	59.758635218559	1.02801562716281e-08	1.88475767713407e-07
ACSM3	919.357101604891	1.56864629519418	0.476033706387614	25.7101249765902	0.00716590683253429	0.0240402691922633
ACSM5	165.352294866207	2.52721227639275	0.40745140698588	87.1159345592947	6.11094519323478e-14	3.39199544623933e-12
ACSS1	1212.22584228689	1.29600976343207	0.208598223149997	84.5337127379135	1.94749220932578e-13	9.88413615257057e-12
ACSS2	1777.00744118183	0.884885750495228	0.228145633261829	34.1488086019992	0.000341970170057444	0.00175953957009383
ACSS3	1535.87362592758	0.423807195352434	0.141586022224911	19.2800435267355	0.056248172911603	0.132307312163891
ACTA1	12.737122772378	3.01110312593095	1.2185791617999	24.2491142872406	0.0117228701407586	0.0364287647233413
ACTA2	7223.81536075917	1.05749467843628	0.224518990669848	46.1158853453894	3.08440154350913e-06	2.84558638737021e-05
ACTB	43314.293943982	0.313252600006036	0.0975028864935933	15.2416541221894	0.171699036284823	0.315193502378179
ACTBL2	2749.95122710542	2.20817229749964	0.337580557666464	60.6111169445294	7.13794349635628e-09	1.36843409617586e-07
ACTC1	7.45273343518489	4.72061333759487	1.45696750397213	28.473209049701	0.00273830601231591	0.0106554901201532
ACTG1	56278.7127522186	0.270515600302495	0.10756164190173	12.258198062833	0.344551614937122	0.526335897601825
ACTG2	2623.65520060325	2.37216460655047	0.324403981482532	103.135254361502	4.26693740882423e-17	4.05540197407544e-15
ACTL10	2.52915818052009	2.65281291524347	1.24916780929731	10.6415903843408	0.473759461954501	0.655977143961053
ACTL6A	612.015988388602	0.668244661994519	0.167477188394489	26.8901634413663	0.0047740258259769	0.0170664656606664
ACTL7A	0.274887785519847	0.323213365360558	7.2599705516973	1.23407469533392	0.999854712290916	NA
ACTL7B	0	-9.96578428466209	NA	NA	NA	NA
ACTN1	6156.62796838698	0.381591235336364	0.111763489532775	11.5724482167652	0.396622873995993	0.580874524027268
ACTN3	54.6779583375194	1.42506806507739	0.67804157087921	3.00609896292133	0.990645039744783	0.99999999313501
ACTN4	10779.8823066422	0.738139400044886	0.200312876535115	23.2495054577735	0.0162962562044094	0.0479137992503496
ACTR10	1657.47445525363	0.475776961202234	0.152884791367	8.82723845381219	0.637835340335957	0.796414716020896
ACTR1A	4497.52779872458	0.487069964552724	0.104660287036372	23.2619683876441	0.016230100847522	0.0477611073428831
ACTR1B	1008.12824894646	0.351385180772525	0.12466566743756	11.7539357974715	0.382420476329113	0.566364584899324
ACTR2	6518.5974179492	0.302993159896039	0.100976096881045	12.6249915127739	0.318540446326766	0.498313001012267
ACTR3	3596.70567135302	0.485536856743434	0.129511153462587	10.8566683635486	0.455348216748551	0.639181497789226
ACTR3B	299.423718630413	0.346162849857416	0.184836260786173	8.07201592964987	0.706838580238642	0.846643793652911
ACTR5	463.247163627032	0.229416204235471	0.14905073231216	5.05923617989811	0.928263899806393	0.982537787203142
ACTR6	737.600186314752	0.366041686373173	0.189076912081814	9.09310625774106	0.613298465413878	0.777729925081769
ACTR8	574.604298332547	0.259369411440327	0.10786596900667	16.8720270690411	0.111718403607236	0.227375163058808
ACTRT3	21.5890439888873	1.27299764990311	0.554949861694197	10.1634889640243	0.51574400923607	0.694541240616066
ACVR1	1573.32011764929	0.612024070129595	0.139564306085412	42.9446538137965	1.11044891610679e-05	8.7984409007612e-05
ACVR1B	2812.3530014562	0.433389211580138	0.146068710597087	18.1499829500997	0.0781650914313884	0.171413629435247
ACVR2A	1442.59630768595	0.365821170599939	0.160663881571691	16.0290592251805	0.140055491061701	0.270823233148006
ACVR2B	922.57031150814	0.808822773350259	0.206019712697266	19.973397491023	0.0457068420983941	0.11168410883344
ACVRL1	920.060523104126	0.845658834912036	0.200709696311174	55.6565423699207	5.87499957242138e-08	8.78155536978623e-07
ACY1	365.217617094865	1.48377752826677	0.252185161494722	89.3831735025232	2.2018800168491e-14	1.30487295469096e-12
ACYP1	234.610139205156	0.514484979396675	0.20216823126803	10.380147399206	0.496551274371772	0.677662667794422
ACYP2	224.065432806021	0.768529554449033	0.226213369793583	15.176456280353	0.174560372385418	0.319543648877423
ADA	236.312349409613	0.849130989009195	0.249992183053752	19.1917308682985	0.0577375156587422	0.134819006027117
ADAL	574.964078700342	0.27868516114786	0.193376852977854	4.55446864125673	0.950812932896717	0.993307916468914
ADAM10	2927.03274730771	0.351618947483026	0.127701272407804	16.5115930817035	0.123175531285388	0.245243456508822
ADAM11	74.0925847017467	0.988844099944139	0.312230224538148	22.6106416600407	0.0200470806906419	0.0568193316691157
ADAM12	459.915634082444	1.5383714719203	0.25506717018714	57.6018571163721	2.5772272747274e-08	4.22870947544645e-07
ADAM15	1267.36849181664	0.619832806621556	0.173349360055238	27.1634876856452	0.00434093847703039	0.0157510479693293
ADAM17	2116.56448962855	0.295646545095586	0.103204787359557	8.39689967779464	0.677370532415095	0.826470804022754
ADAM19	431.75141994525	1.25682867977711	0.237661572871523	43.2837629939306	9.69260556761725e-06	7.78072946541513e-05
ADAM22	71.4520120323966	1.98214178583452	0.610362642045378	25.4144650645471	0.00792421067817024	0.0261274621100396
ADAM33	3571.06888767347	1.28479804220769	0.199005077468025	136.77701011907	7.36061240828221e-24	1.74481152252327e-21
ADAM8	148.42723165906	2.0783579477901	0.378340794197889	54.4666347303001	9.70125260867424e-08	1.35279318944244e-06
ADAM9	1095.91158294025	0.594064235271569	0.193375329722223	10.3662626493882	0.497773388211977	0.678718379698045
ADAMDEC1	47.0554488908917	2.97101499529773	0.707386175583545	35.060507151986	0.000242170527995653	0.00130398021608349
ADAMTS1	2347.90220093376	0.359618735457106	0.199637862363817	1.71300464491912	0.999277333702867	0.99999999313501
ADAMTS10	491.111731765316	0.930241279280581	0.219354052397338	45.1799796622908	4.51099231675485e-06	3.98474284043373e-05
ADAMTS12	317.921333754442	1.53364399546263	0.446884189568238	14.4257457710773	0.210323656344038	0.368057265214176
ADAMTS13	31.3838246589078	1.70347992590842	0.615207846164047	22.7978467842082	0.0188717341156997	0.0540814351724126
ADAMTS15	384.516961102761	1.06516403764872	0.278455320183193	42.3442772477586	1.41185661443458e-05	0.000108247712801531
ADAMTS17	449.889908572382	1.46587201785085	0.358858342216408	24.5141023775222	0.0107315749263342	0.0338441858179226
ADAMTS18	293.119940937354	1.14333576589651	0.338743012038347	36.0493730407151	0.000166066126420165	0.000938588045228585
ADAMTS19	34.8311549516669	1.19683771620601	0.390893641929673	14.3503496961739	0.214209737907524	0.373043388859006
ADAMTS2	1232.60702111215	3.12503252367296	0.451646838814987	112.834974808047	4.96713189276985e-19	6.21631928617514e-17
ADAMTS20	40.4639782163475	1.68848141982068	0.526921190644704	8.14637613132828	0.700134752862405	0.84140612760495
ADAMTS4	64.7827703194089	3.67337855276577	0.711028258444567	35.1606802016308	0.000233122439733979	0.00126404306733045
ADAMTS5	837.33209754387	0.982748989651577	0.341351036811105	15.498813340286	0.160780429696222	0.300376901061584
ADAMTS6	118.890448031563	1.04036939753904	0.272223859730471	29.7023006110656	0.00176434719877262	0.00726990423477902
ADAMTS7	343.596303981005	0.675762594956328	0.210517624726779	22.3796522724209	0.0215915853495357	0.0604654417245024
ADAMTS9	714.458726147252	2.02156821959332	0.274563379909046	119.118216425725	2.72719817082573e-20	4.04046440764468e-18
ADAMTSL1	202.812283835085	1.42268519491092	0.259471967018227	67.0008506786781	4.52180643958735e-10	1.15915875256037e-08
ADAMTSL2	420.834611392448	2.74388254761046	0.314169895083398	93.2860496183284	3.77476949936402e-15	2.57823154720969e-13
ADAMTSL3	613.593914678774	1.47475380233902	0.210605633293623	96.7700358861292	7.77005792089909e-16	6.03357281465081e-14
ADAMTSL4	1501.92302116158	1.22954939451199	0.216376199578614	68.677776769353	2.17748924525238e-10	5.94471793808525e-09
ADAMTSL5	300.072613863801	0.8065608413089	0.266598166486102	22.5438808009674	0.0204825298237446	0.0577691060216447
ADAP1	364.553953511078	0.673790238376564	0.195958336239552	24.8920009553082	0.0094543314698688	0.0304159867134578
ADAP2	188.217220881226	0.670510945080106	0.258423318497352	21.8000476016824	0.0259688720679262	0.0706326678316205
ADAR	2030.49775697838	0.356191141805294	0.203822536658557	22.5945246631215	0.0201514050036907	0.0570428012671206
ADARB1	1594.26415206716	0.351294692816731	0.117831661146316	14.4764432007346	0.207741378986399	0.3646786064817
ADAT1	454.761490980405	0.469843675442281	0.232322842889379	4.89587932350929	0.936103920553203	0.986122125541197
ADAT2	120.152980819814	0.688077360673937	0.258378860351384	15.721368143161	0.151794249141699	0.287669518995118
ADAT3	20.935756211843	1.42855138397774	0.530508033386416	10.0452285668538	0.526323456420191	0.704082547032959
ADCK1	110.310121003507	0.68961866041064	0.250952659656608	15.9071005481151	0.144614932786559	0.277297895005365
ADCK2	422.881609193279	0.521745153756358	0.15122368139934	32.9741170782689	0.000531267611410287	0.00258002195765386
ADCK5	1370.493213908	0.471814319647946	0.213981244998816	13.5290761580113	0.260154723776933	0.430471998799493
ADCY1	83.5130279061643	2.28903508585107	0.48435788910371	18.4745132156849	0.0712034056087313	0.159302400578539
ADCY2	373.506838023862	0.791441629182837	0.177849574882691	26.9031932705963	0.00475247213117268	0.0170144919991113
ADCY3	417.831983445721	0.723923418609655	0.271975150649265	6.81083466867926	0.814189031016166	0.917716199706015
ADCY4	356.325896815917	0.758077007005714	0.201360894231721	54.1419675748383	1.11202134428741e-07	1.52112138941256e-06
ADCY6	1116.27407422697	0.460899588294016	0.143335694332242	17.629235101371	0.0905920296514715	0.192729258309312
ADCY7	2021.867761361	0.472164437679995	0.15374310667945	8.98119077107566	0.623628588089733	0.785736144410958
ADCY9	443.028560158452	0.690833153608584	0.192953050236959	30.2495566743244	0.00144768838098003	0.00612161032284714
ADCYAP1R1	196.723265492211	1.59480232980547	0.319847006340472	86.1910644732263	9.25957756999354e-14	5.00190961012868e-12
ADD1	3805.60772419523	0.564389661691741	0.130516221179654	30.5010367621909	0.00132134617618583	0.0056718798687619
ADD2	102.906009134352	2.04521550587025	0.492849650347359	32.8591161529929	0.000554539201292367	0.00268076064463529
ADD3	2692.82932786709	0.601414933372934	0.179825882868086	17.0669918175794	0.105909540163934	0.218331422627697
ADGRA2	1463.15462750058	1.91089993302814	0.284727827993116	63.2590038242214	2.28688295681814e-09	4.92817162533997e-08
ADGRA3	3152.35370782482	0.8026001041036	0.153973698095309	87.9346660400175	4.22827386895721e-14	2.44113152394323e-12
ADGRB1	108.686211449188	1.41531441827793	0.449948923349293	13.3117993407376	0.273435776824973	0.446399081773325
ADGRB2	75.833807976411	1.06144978590699	0.331561681127394	8.84564857016517	0.636137198802955	0.795181364767091
ADGRD1	205.912628163698	1.88732532874896	0.437744716874972	26.542467493839	0.00538500287360352	0.0188765523486843
ADGRE2	25.3578003060623	3.54040276227138	0.792145996891384	38.1701460382036	7.32279110458676e-05	0.000459218543312538
ADGRE3	7.87323928504752	2.19289094748075	1.03879570626718	6.39473317468068	0.845772006613109	0.936858722443515
ADGRE5	686.861020451074	0.902840513479188	0.270885528137865	27.4116097606252	0.00398062006743608	0.0146540513312283
ADGRF1	17.1583781506509	1.93737102143013	0.908916719776099	3.50712036301093	0.982188047173341	0.99999999313501
ADGRF2	1303.56685432638	0.673050533668578	0.15862601396193	31.3791871207318	0.000958667015072029	0.0043212934422117
ADGRF3	1.42880141738932	1.06696941855062	2.39145211139904	8.99469649186968	0.622381893113291	0.784950723857016
ADGRF4	1210.18253371034	0.912649618847823	0.142005166563521	113.842279070487	3.12191975414966e-19	3.93147257039759e-17
ADGRF5	1459.5943185159	1.04681193044533	0.189980564104868	48.6711306745548	1.08341410590245e-06	1.13342216094645e-05
ADGRG1	4341.31810521273	0.67574918342939	0.138016586635127	47.4955284977002	1.75581068089519e-06	1.74189214226278e-05
ADGRG2	369.47129959932	0.930148340069851	0.221071143726833	26.6019745928449	0.00527538168618675	0.0185342049860465
ADGRG3	40.7507297433221	1.63413827886288	0.654859540967521	24.5205194382403	0.0107085829761003	0.0337794547795208
ADGRG5	29.4500987689962	2.2116566899004	0.477524957931471	57.9806959324105	2.19391214639331e-08	3.68265249318786e-07
ADGRG6	1121.97311811528	0.752141426106888	0.238776140387039	23.4713474920958	0.0151557171055129	0.0450809838199982
ADGRL1	1767.83222701514	0.683260915658628	0.183138582230391	16.3766475255963	0.127713910622942	0.252161448813489
ADGRL2	4143.80226096872	0.502907841327241	0.148980464503965	28.7748607894097	0.00245980476837385	0.00972387802196677
ADGRL3	1245.23204284925	0.759777617779404	0.188916178760512	24.8553379928297	0.00957162897591544	0.0307099923942229
ADGRL4	339.862829330783	1.11738866964192	0.339507649305792	19.248021592363	0.0567841642957849	0.133292281939737
ADGRV1	103.644167335755	1.58876382969427	0.263131845731395	39.778202474898	3.90380092603794e-05	0.000265645676659029
ADH7	0.0516356834085323	-9.96578428466209	7.25997055193951	-0.822608912514916	1	NA
ADHFE1	103.079692559436	0.905769350477273	0.296579777794055	22.0339396772794	0.0241116229274097	0.0663423583728496
ADI1	1149.48832168965	0.51716646370319	0.15762863398478	13.0778637173677	0.288266765479905	0.463365541097297
ADIG	160.032613431373	2.53073125555723	0.450885220398044	54.7490804675103	8.61391271031389e-08	1.21968887702118e-06
ADIPOQ	46.1639681089976	2.03704367105698	1.0699771159446	40.5148050690627	2.92007828233221e-05	0.000205650672180048
ADIPOR1	1674.0431269962	0.429959732767827	0.111231596551722	13.7871198596756	0.244997655757878	0.411955083523782
ADIPOR2	1225.72322168347	0.688088121105773	0.134400472166626	55.0861652019806	7.4734894218819e-08	1.07636410551464e-06
ADIRF	2545.87745487338	1.58318264444627	0.234501242934366	103.753659556092	3.21571718460051e-17	3.13012007500076e-15
ADK	1398.01236060032	0.916950839910914	0.170626505598555	36.6317252074916	0.000132798428136059	0.000772446746106654
ADM	655.152861427074	0.586073939276437	0.350256068443129	9.78504356091821	0.549820145444043	0.724071045607582
ADM2	434.677293800428	1.64357920508365	0.656683393076636	6.41573934150711	0.844236140605553	0.935826263798277
ADM5	28.1210769658075	0.439010141597699	0.44771968005033	2.43711475677438	0.996275037626754	0.99999999313501
ADNP	3670.56484905178	0.325135517823626	0.124104754104929	7.54642672027762	0.753265396236188	0.878168757205828
ADNP2	952.663627259609	0.367073325813702	0.124194812000009	18.0075284176867	0.0814060920820687	0.17682744171643
ADO	1816.04601705021	0.377043770370006	0.106843837301738	27.8938213664083	0.00336078121313479	0.0127166912044043
ADORA1	36.3764403376688	2.70036727043807	0.576952198722146	31.3319835229447	0.000975420168351134	0.00438405999823935
ADORA2B	451.174189757344	0.709028140563944	0.180272517318171	20.515152118169	0.0387565408128257	0.0978455758473405
ADORA3	130.818151023687	2.02309303348149	0.382051653090755	54.6351774967897	9.03703971297017e-08	1.27515668833572e-06
ADPGK	627.784846216508	0.291632725434295	0.125710367682857	10.5303378084463	0.483405624462664	0.665310104323648
ADPRH	74.5119582567745	0.810559405086029	0.380024910155178	19.4899482928904	0.0528460848881389	0.125580347259242
ADPRHL2	853.239888413336	0.435456018532524	0.181239540992303	9.12059421091504	0.610761880581116	0.775831618448425
ADPRM	226.925698480792	0.747436187397558	0.25354464791406	16.8558609250971	0.112212079762734	0.228184773803857
ADRA1A	163.329933803549	1.32707227408079	0.317576670191184	56.2095166883267	4.65051511849193e-08	7.11489970558041e-07
ADRA1B	49.0268157649815	1.23310070050822	0.415078709165176	18.046287372396	0.080512778560309	0.175454464115473
ADRA1D	410.636818559212	1.45435043986968	0.282365620342442	57.0936350872668	3.1977736898828e-08	5.11770786953522e-07
ADRA2A	163.865115016346	1.63711116216492	0.311446166580481	77.9405324641101	3.68651845022284e-12	1.50974919214512e-10
ADRA2C	34.1348030014152	1.55726147537294	0.410389555301886	31.1761899054692	0.00103275565756784	0.00459055674924651
ADRB1	66.3375804976072	1.58722679278802	0.413629809892966	17.9879239014313	0.08186124520309	0.177647950737577
ADRB2	113.004121231105	1.97501270695761	0.446860100650468	31.161575727304	0.00103829887330759	0.00461214373859671
ADRM1	1994.13263417995	0.767969908116596	0.16134190805741	31.4789545553263	0.000924172893160319	0.00418359012003758
ADSL	765.463321207091	0.357201417201834	0.122718527479611	17.2830561320093	0.0997772136116204	0.208775122699302
ADSS	493.115537718084	0.607861653677103	0.170090145841996	16.3273172535062	0.12940775006263	0.254856490666791
ADSSL1	166.935915339014	0.968704090922045	0.226787546617757	45.8808128324135	3.39397606413157e-06	3.10137069007651e-05
ADTRP	3460.33827086912	1.43992988516039	0.358259690506649	29.4349959932551	0.00194243152150242	0.00790029324318777
AEBP1	6766.03315515471	1.9951766761643	0.2902741891571	85.8164568630446	1.09555206120745e-13	5.83975621197593e-12
AEBP2	1998.43327634466	0.560781149711997	0.11887588418325	17.3811444849601	0.0970960966473747	0.204152066299484
AEN	403.810109594176	0.863045513886363	0.23866672994882	20.3603047773514	0.0406374237773391	0.101626343761897
AES	5466.96630705904	0.279131449959004	0.10678620061845	13.6615544930322	0.252289863228612	0.421158944009387
AFAP1	1010.8115859493	0.432093861750366	0.166643756713345	13.8615756037566	0.240747947550389	0.406675921796847
AFAP1L1	148.362607706192	0.878187931858516	0.363104296445671	14.8440399538276	0.189748780349774	0.340025629248275
AFAP1L2	1750.08024000198	0.864448483122325	0.222234515661988	22.1948913728523	0.0229061263207871	0.0634936771547035
AFDN	12068.0405010763	0.767270683955029	0.150215438251243	53.5453897921585	1.42850518509109e-07	1.91121852419657e-06
AFF1	3224.95077012781	0.395717687659035	0.110344075665723	19.4452463236476	0.0535546465451775	0.127039389361759
AFF2	16.8638762164208	2.0147606286808	0.683541086300707	31.4855645622634	0.000921930607208633	0.00417625445248353
AFF3	401.957814259313	0.696373277078709	0.226377152531646	28.5750012856065	0.00264109012865307	0.0103270203767087
AFF4	3473.65504342855	0.523317786651927	0.136167441471097	15.4204299061327	0.164046954747557	0.304868298395916
AFG3L2	1877.0116749571	0.572860955194504	0.107724042401216	38.2786417373343	7.02000752712755e-05	0.000442433943272108
AFMID	110.480118829725	0.89970187849369	0.274848599373809	17.24823315979	0.100744333943334	0.210243147035135
AFTPH	1980.17012322024	0.385463822605377	0.106533850964971	26.9011239350825	0.00475588894833435	0.0170184458733086
AGA	571.241937634833	0.692520149888071	0.140345398387255	52.2846295610084	2.42107750488378e-07	3.03561236128831e-06
AGAP1	834.01569792074	0.784811778720438	0.237045208584013	19.2685089898501	0.0564407142595856	0.132667283203032
AGAP2	107.142502637243	1.06490181489129	0.339710067093323	13.4726524725778	0.263557955536299	0.434538750735481
AGAP3	1766.93288538411	0.529095426606091	0.156540915754103	18.0059443234046	0.0814427868117504	0.176849952739515
AGBL2	50.5321607251114	0.968145219088481	0.305066866016492	16.6448143138027	0.11882972212979	0.238381130146669
AGBL5	254.508618923251	0.520160406768698	0.186627508253256	10.7567611304444	0.463860435899042	0.647162714508365
AGER	69.2706866092725	1.44291959647013	0.35908334711295	29.2157845355044	0.0021013267655949	0.00845608807668697
AGFG1	1334.43240351338	0.437923911555216	0.117677924833915	21.0791401369407	0.0325603463708268	0.0851250057124417
AGFG2	514.640895999213	0.362857780314343	0.161020309052699	6.20259282482772	0.859510280449956	0.945343177237214
AGGF1	1546.90243830463	0.376436392060289	0.125344797682154	16.7626538206346	0.115094901331681	0.232602524266003
AGK	391.321133512086	0.43027677750769	0.136923532201167	9.55179625368282	0.571095545703568	0.743010534666572
AGL	650.451171370152	0.831700943260428	0.215204611347039	20.3859594806605	0.0403201481370115	0.101046102588637
AGMAT	11.6100965602247	2.33949031370987	0.654412709144225	20.0652302522461	0.0444540808190565	0.109125886260133
AGMO	186.209509726765	0.837337518378491	0.279548308090107	21.3913198563799	0.029536244286107	0.0785646749358368
AGO1	2617.45912270603	0.229632178333059	0.119579339011519	7.5414239088567	0.753697649221385	0.87847827466661
AGO2	3750.79765962449	0.498837861925592	0.181250887982165	16.4838991786391	0.124095628321257	0.246563732871019
AGO3	1827.48010650069	0.567090063650376	0.195154448762937	10.8766213566902	0.453656787751495	0.637651246348438
AGP	6.14589729084075	3.29737152002186	1.07022548725293	24.0929447858084	0.0123469933631695	0.0379642254348393
AGPAT1	1110.31155868529	0.408256929269428	0.115020946558951	32.3355913389291	0.000673646720783052	0.00317578562869857
AGPAT2	2628.90397862127	0.595267604515423	0.161651316839762	17.1957718599568	0.102216597203458	0.212501260529557
AGPAT3	2033.46871811594	0.486338403970388	0.153090295276155	37.7218151804953	8.71586937593694e-05	0.000535088519365489
AGPAT5	1834.00952632412	1.00478462719012	0.214743496469461	46.1360704071907	3.05915884234989e-06	2.82488503732851e-05
AGPS	925.668059063875	0.931719435763833	0.229686049940166	17.0234513092909	0.107183812415211	0.2204499884607
AGR2	32.6525918507553	4.88016012968084	0.862593965687324	77.7356868600738	4.03734084539815e-12	1.63350162035999e-10
AGRN	4090.56589183001	0.435360634431956	0.176137691060512	13.9167231981071	0.237635835666959	0.402532530714884
AGRP	2.01992361128423	2.1591641889175	1.87701982277375	8.03332672589028	0.710315388838824	0.848594046537409
AGT	10.6922790139143	2.54230936604088	1.05019781757722	37.3517220554507	0.000100592208338566	0.000605747879800884
AGTPBP1	571.619344121328	0.764442931059868	0.181578539221933	44.2613704088538	6.54018711493122e-06	5.53587424523782e-05
AGTR1	261.604647330577	1.33296415823073	0.357482760229774	22.939610707737	0.0180249317893975	0.0521115582354526
AGTR2	0.332322932815934	0.110237141750129	5.35759351561358	1.4366719876017	0.999691942927025	NA
AGTRAP	454.221172040623	0.428246307154521	0.167136482378231	9.4944555385178	0.576349978085051	0.74762817512834
AHCTF1	2173.78046939271	0.305849564985	0.155348041019447	12.2138192999486	0.347787674222699	0.5303544878463
AHCY	12733.9991819177	1.47177339348239	0.193652137744168	95.3811258250843	1.46011695639198e-15	1.07765188843744e-13
AHCYL1	2561.99242827908	0.393643253589693	0.0830033064020731	33.3319322951612	0.000464786034678472	0.00229365021129967
AHCYL2	1781.38341757722	0.683651433715235	0.158792246401338	44.9488479171916	4.95371230687382e-06	4.31901121900479e-05
AHDC1	884.407925123553	0.488785079256565	0.182469361074096	17.4004978694674	0.0965745333263484	0.203246320450448
AHI1	586.875872868528	0.797732603002534	0.229877982283752	15.872485623421	0.145931216906716	0.279051730991119
AHNAK	97440.0244803118	0.578083523376832	0.16111881031381	20.776363798224	0.0357634121588697	0.091912881580238
AHNAK2	5753.60639597348	0.321826721909115	0.168325522665879	11.2099295723269	0.425847422976186	0.610574235077717
AHR	1818.97833572202	1.31285731302105	0.265691227340725	52.0764881274139	2.6408101524206e-07	3.27444207760755e-06
AHRR	85.0180074318284	1.71262691112693	0.458634517004657	29.9141761016765	0.00163451258163787	0.0068143583710783
AHSA1	2268.32712415373	0.670815217584805	0.12424803822412	47.4812733812732	1.76609364543682e-06	1.75036993910017e-05
AHSA2	363.531724760801	0.758271946433055	0.20108503973149	17.428820954256	0.0958156209569005	0.202007842069749
AHSP	10.8923563749028	1.65366116387572	0.786450457794983	9.43262925834168	0.582024216952524	0.752129678513109
AIDA	1864.71478743559	0.517373729029484	0.196168366088551	10.836859129221	0.457030316395812	0.640917583871047
AIF1	233.792825996422	1.45616111319995	0.314754309195869	48.2907227529052	1.26695231624563e-06	1.29846501627839e-05
AIF1L	1318.5003513244	0.275161773840043	0.147276418543453	9.59235034307886	0.567384560356184	0.73990236920696
AIFM1	738.945495088478	0.282902934090173	0.104231843144183	14.3852009085043	0.212406609966808	0.370511711905567
AIFM2	301.488074937793	0.826435627811582	0.247544364519822	28.3393650192061	0.00287139175840792	0.0111068674486775
AIFM3	43.4157278261674	1.11198791370147	0.466226664209974	6.40860027483717	0.844758846281869	0.936199658639975
AIG1	558.838991115306	0.596810871818254	0.19883001725187	19.2853781151021	0.0561593248114626	0.132113746132652
AIM1	9356.34623090284	0.97180075539084	0.159386888632581	77.123756156655	5.29606897694852e-12	2.08418933235421e-10
AIM1L	2684.27941714459	1.55311109257885	0.270161066037093	57.2802064213558	2.95439236321093e-08	4.76224413810696e-07
AIMP1	2992.42322645788	0.366777743220471	0.143629808887136	11.1005085930079	0.434881826065542	0.619428383528532
AIMP2	754.154706704031	0.438430118040848	0.143884984502983	27.9794149549285	0.00326092924164424	0.0123900553064095
AIP	679.041888799923	0.676135876901657	0.149088240439012	24.9342037153821	0.00932099901228887	0.0300590283448477
AJUBA	3847.23888121211	0.396565612217239	0.131245862813293	32.3484042465319	0.000670454436701394	0.00316443814595839
AK1	249.912547291245	1.06431259353896	0.229042583487297	46.7449550740658	2.38665286149205e-06	2.27584801259836e-05
AK2	1998.79303156675	0.534805484688138	0.138876414930365	38.1568021160762	7.36090511742713e-05	0.000461094447189289
AK3	2114.17640083299	0.84564218415821	0.165857915393691	38.7351095546089	5.87530992867531e-05	0.000378699999209465
AK4	2734.67602616097	1.16782929915342	0.204744931717923	90.6934281792333	1.21912778644876e-14	7.65240055113894e-13
AK5	6.90026219472061	2.45579976182269	0.824787909956769	17.8206978975491	0.0858353909376934	0.184676699626651
AK6	249.207251263531	0.609594903519136	0.313082159537332	3.54420562264625	0.981408789357002	0.99999999313501
AK7	9.91339421170981	2.11735294116134	0.915932430860328	13.3859807262194	0.268848004217663	0.440694866455062
AK8	91.3585942119959	1.38725389790272	0.299137674161023	31.008660158751	0.00109806018581232	0.00483391188200405
AK9	1.47966712126746	1.97209017978997	1.98317188038729	7.22206982956241	0.780825207686761	0.896217943800592
AKAP1	1115.55532938228	0.765793488035112	0.1855375814891	32.5843806051182	0.000614228116715961	0.00293898891562809
AKAP10	1125.25461429584	0.337170814769952	0.114194643895813	37.1904243643094	0.000107064162419266	0.000639180980321716
AKAP11	2880.24174602538	0.604057713332498	0.159983124536001	18.2709980553772	0.075501786951467	0.166844224314832
AKAP12	1129.8205440147	1.40188350506106	0.323357647761199	25.726053808537	0.00712708065426603	0.0239379143361904
AKAP13	4146.06462138287	0.3824494000305	0.172902112385338	6.01848388457847	0.872128108235292	0.952233079702661
AKAP17A	1047.41239091566	1.03186660824667	0.202882051227185	63.2333457684121	2.31232933694354e-09	4.97237180470389e-08
AKAP2	2132.06899915743	0.545229648516488	0.218563198517052	3.6708303835137	0.978576521416543	0.99999999313501
AKAP3	73.0989071681907	1.07774386899498	0.376692949800587	4.61338241447169	0.948436757871459	0.99200852545432
AKAP4	308.158226015323	1.57062552735155	0.306418119983065	76.5789660290077	6.74190987263386e-12	2.57277920499431e-10
AKAP5	146.376119208086	0.742282662621792	0.210157282305313	25.2273816366102	0.00844284850754112	0.027607100710556
AKAP7	100.944730165978	1.07404686047737	0.314275323031814	16.9451670511949	0.109508029601119	0.224076093067223
AKAP8	1552.3333018892	0.230432701803479	0.110225410441368	5.51271794069072	0.903822467401052	0.969914726015328
AKAP8L	1539.24244432211	0.582655817900028	0.185366389103248	17.863340588633	0.0848062444872343	0.182755189323346
AKAP9	4630.2777124459	0.376877369102334	0.179519757267019	21.9143983872239	0.0250448605062234	0.068521432647241
AKIP1	326.370153717494	0.45991465313772	0.174074939480538	13.9168611870653	0.237628086487721	0.402532530714884
AKIRIN1	1781.96059675266	0.312506295274916	0.121719950012561	12.3238630220901	0.339798317616947	0.521129266377216
AKIRIN2	1392.69747969374	0.535838566223022	0.118990977899719	70.3521952009173	1.04709641874326e-10	3.06848474553626e-09
AKNA	284.142107366682	0.773625270335165	0.275334591354768	14.8977499410208	0.187226011586186	0.336853014327178
AKR1A1	1415.34120220204	0.52493113980316	0.152642022730379	29.1772095846985	0.00213055726965629	0.00855321745891703
AKR1B1	457.499559787025	0.759395546100401	0.343508336237555	6.15178052154033	0.863047347491167	0.947452381202981
AKR1D1	89.1975021543782	5.52003379257219	1.19431163495887	58.178610003043	2.01675765252386e-08	3.41763245926856e-07
AKR1E2	26.6886048717416	1.0895747908096	0.464106188353865	17.0685285729524	0.105864803833341	0.218261529974213
AKT1	3884.61790069119	0.505225061747744	0.137878947532328	13.5524197809102	0.258756095076921	0.428862100822972
AKT1S1	814.112590918109	0.781980248144015	0.159688853607828	37.3245706936736	0.000101654108475764	0.000610682358878404
AKT2	1809.85497948249	0.587604651685347	0.156279085065763	22.268168774409	0.0223760935614736	0.0622213509757288
AKT3	1271.43589925472	0.564110993212679	0.216232280474291	12.6860515403964	0.314339149229111	0.49341535703716
AKTIP	2496.43564932298	0.632701268714219	0.149170744946257	38.1911964040702	7.26305902232735e-05	0.000455898368351632
ALAD	640.327952387464	0.811564838874312	0.187643553142817	19.4482273700616	0.0535071292106216	0.126941616209209
ALAS1	1478.03621828507	0.578668447742974	0.125481180527561	56.2793360212495	4.5151505205938e-08	6.93412864629912e-07
ALB	2.08730377828017	2.38848427740222	1.49647802843411	12.9400665656723	0.297260685177191	0.473359908399615
ALCAM	4794.02055491799	0.673302982947185	0.165217858753566	15.1463930972219	0.175892611232494	0.321340123648883
ALDH16A1	459.498568052262	0.832798359360349	0.184308488697817	25.395406174506	0.0079756264392487	0.0262754900465046
ALDH18A1	1004.9041406873	0.747489713323058	0.201756665052051	24.4927495688414	0.0108084177528067	0.0340545440658798
ALDH1A1	2139.76194491166	2.60886222363309	0.432296911523525	86.7961130533438	7.05575530126542e-14	3.85274833510019e-12
ALDH1A2	94.2126179085826	2.66023020403006	0.42891534889853	99.0789639776656	2.71731838479059e-16	2.27518870325061e-14
ALDH1A3	1481.72846696191	1.60898571462491	0.261259409171827	61.7117323532098	4.45148312671105e-09	8.98239849181219e-08
ALDH1L1	9.42017453711229	2.1971149649024	0.776039129961868	17.1263221968006	0.104194135963514	0.215567064948028
ALDH1L2	941.409987807272	1.22922891167587	0.263222229001926	55.7953921739967	5.54033975548291e-08	8.31215977164744e-07
ALDH2	9434.56942989941	1.25233122978859	0.211974521747703	48.7500343935568	1.04877787802196e-06	1.10004297054994e-05
ALDH3A2	7308.46265632545	0.520464459707959	0.166647286305076	23.2382301210828	0.0163563257017865	0.0480623605899513
ALDH3B1	173.159870359228	1.20806944367633	0.210250500599026	118.728104861538	3.26685420188028e-20	4.76984386331057e-18
ALDH4A1	1225.902524555	0.589419607521582	0.183827521969468	33.9231766003207	0.000372302165853316	0.00189671715291491
ALDH5A1	444.135035349213	1.00312820901012	0.282967849723685	17.2036173890941	0.101995248173373	0.212137144688924
ALDH6A1	2428.84883440604	0.367675462384538	0.144757464459801	10.9527531189482	0.447229946167805	0.631403567039417
ALDH7A1	2995.75268136683	0.289269023761194	0.14672546388541	10.7578826256067	0.463764491057083	0.647162714508365
ALDH9A1	1471.70741250099	0.576558140162404	0.14215483829377	39.4210266796391	4.49177810439974e-05	0.000299883489150266
ALDOA	12161.6487123774	0.822752003190581	0.160633666198633	28.225638098509	0.00298935058022715	0.0114991265446729
ALDOB	5.22298589070532	3.8589200187074	1.09791373944604	9.15462189743531	0.607622459719071	0.773110946001488
ALDOC	289.216366101862	1.82492462908915	0.449334222591888	48.5129050029005	1.15631773114861e-06	1.19787382853024e-05
ALG1	326.878418238789	0.823639515681327	0.177092702379483	26.3142533413691	0.00582595116336252	0.0201938912765511
ALG10	1153.81899603059	0.555755617694905	0.15936966463675	31.0270072574502	0.0010907173981699	0.00480894198155915
ALG11	777.77570136038	0.407472887823522	0.120420139677623	30.3081289651415	0.00141725589848022	0.00602326283452395
ALG12	971.199578035666	0.524683128710789	0.170862172784252	13.4277214944266	0.266290899182513	0.437606665657651
ALG14	496.502054932365	0.663602179424767	0.222541796195143	16.8644842870652	0.111948510940648	0.227774467024449
ALG2	1414.02859460452	0.501882664715587	0.164687442377924	6.51752717411836	0.836702556963647	0.930958077213569
ALG3	289.42205052702	0.408535948937413	0.160787801368804	10.3692638447558	0.497509132638673	0.678510323103873
ALG5	363.345565880876	0.633645875313889	0.204339041850202	22.6293186669929	0.0199268169354798	0.0565341360789894
ALG6	355.199434097808	0.439207320690293	0.238074119056214	5.87369106100266	0.881657525903406	0.957139950938994
ALG8	225.645667456294	0.499375605646905	0.188645248984583	9.84313352816906	0.54455028317351	0.719740724957732
ALG9	596.254966813405	0.348384106788488	0.129611785460836	12.9135774640882	0.299011477621409	0.475440519459736
ALK	28.7201381089212	2.42523071384632	0.560088676690865	38.1380327377805	7.41484571448382e-05	0.000464124654554627
ALKBH1	343.189794769112	0.333360419731773	0.129887928146089	8.16287084743783	0.698644066071215	0.840466850992233
ALKBH2	84.0450910751931	0.451960772729826	0.235916508924662	8.72235456107552	0.647502955272665	0.803803650162586
ALKBH3	236.611502657544	0.377378314342292	0.151237211136766	12.4291118692811	0.332267161165491	0.513960619555003
ALKBH4	509.906674583106	0.868847288013319	0.206610704651418	24.4653720011858	0.0109077042616071	0.0343351559392473
ALKBH5	2501.24007999814	0.334599808783357	0.113292475557883	18.7888734496115	0.0649901845024241	0.148266216886248
ALKBH6	287.239268557123	0.883578533236559	0.250563560713059	13.8799937273526	0.23970520835261	0.40525425768558
ALKBH7	391.922092842276	0.845083704888668	0.19354788470281	17.0497357381954	0.106412996890574	0.219077906850739
ALKBH8	231.362109812908	0.378679993897942	0.19528379387538	7.96048484522203	0.716839117795839	0.853585628699735
ALMS1	1341.78793631781	0.899867332878408	0.180032232311066	33.3851667868232	0.00045561553041814	0.00225446889056854
ALOX12	767.638770676366	1.21686128698041	0.214405087461802	82.7823218579645	4.26487074213409e-13	2.05581054026937e-11
ALOX12B	462.457756119587	1.05662419531761	0.287865782603976	58.7565494598531	1.57673184741579e-08	2.7458573892464e-07
ALOX5	366.822786330331	1.37443728375121	0.281690645075682	59.6484894535532	1.07756322839675e-08	1.9577837230808e-07
ALOX5AP	190.932551751064	1.68664460566409	0.388414469194991	43.2459799574106	9.84070077818586e-06	7.8933232475982e-05
ALOXE3	593.08654052948	0.828191844791416	0.207508890951267	35.538684360698	0.000201863556636103	0.00111403692212019
ALPK1	214.84952412048	1.09415103339753	0.278835736923052	34.479034438324	0.000301884106147285	0.00157704507512617
ALPK3	328.817164048935	2.34791559176054	0.31868643509292	179.921551328157	1.06399440019262e-32	6.91562037725195e-30
ALPL	165.626048131878	1.05995650637212	0.293058234242042	19.6949373724266	0.0497040618010419	0.119623404351313
ALS2	1400.45064119469	0.393508539788292	0.134089276788329	26.6372214727526	0.00521146184212466	0.0183384115712487
ALS2CL	925.277477630341	0.834177624985673	0.205458918545823	52.1261363261004	2.58666593409979e-07	3.22118244166729e-06
ALS2CR12	0.204021821257542	-9.96578428466209	7.25997055183635	0.588263368002821	0.999996764031113	NA
ALX3	36.5620238022986	1.9890939005486	0.412532369295416	36.5856910505885	0.000135170968585217	0.000784661436480421
ALX4	165.319013907792	1.60169060850242	0.37280548852845	41.5315868724948	1.95166483757785e-05	0.000144414597180889
ALYREF	1178.18800321689	0.736043773034749	0.150159095751817	57.1520866707558	3.11945623554316e-08	5.01627483559131e-07
AMACR	176.860475836388	0.920294870222699	0.32412738005961	12.7056517158853	0.312998400820275	0.491781408150945
AMBN	3.9519665750518	1.42097044001841	1.12315227296219	6.77674548369441	0.816864162692516	0.919137544764142
AMBRA1	1537.58297348559	0.598992012935799	0.149158528829943	20.1325879997391	0.0435551532828221	0.10741649736788
AMD1	2173.53207176146	0.485119622169346	0.157167951758325	11.3024266830007	0.418285821869173	0.603511709619905
AMDHD1	67.2375359003977	1.469649676233	0.373168031165031	15.8085586568494	0.148388196308239	0.282676918541618
AMDHD2	901.876811265145	0.659178986494345	0.185018596139334	14.5232762182908	0.205377835767987	0.361695482290812
AMELX	0.364433620263775	0.110237141750129	5.90340610717695	2.1367019698413	0.997955104145478	NA
AMER1	536.463844388324	0.323255158528556	0.194872548260067	7.69511480204062	0.74032664420083	0.869381137312188
AMFR	3968.61657722387	0.262941111396795	0.0863133910856753	14.9950008012966	0.182725909739498	0.33082436475345
AMH	7.9357697924622	1.56948341593018	0.79304671709346	11.4874222556194	0.403376767900056	0.587511818448622
AMHR2	137.495655349316	1.13510388310187	0.313009625601734	17.2206201147578	0.101516962439426	0.211373906851494
AMIGO1	145.129095815992	0.768763728312897	0.284782137944464	11.3663862597414	0.413098520723278	0.597997132987522
AMIGO2	417.843884894704	1.04822256106059	0.209846927953393	43.6308038644779	8.43121796020112e-06	6.91978047576751e-05
AMIGO3	129.859603600266	0.5986357790131	0.235316945253118	5.03777023970946	0.929323620217792	0.982781799389508
AMMECR1	1181.32369106771	1.26111490522312	0.185396854979951	97.9775469133703	4.48671967559905e-16	3.58741725173195e-14
AMMECR1L	1490.07635898159	0.526476052444189	0.11168845200277	58.4564298204062	1.79180222489163e-08	3.0752149088025e-07
AMN1	690.552288497636	0.738639670401427	0.22725110746364	15.9282577140364	0.143815255540336	0.276053499464822
AMOT	951.877841579034	0.300903845541898	0.159381667332747	15.8858483364257	0.145421909004805	0.278474248673049
AMOTL1	4733.37926244118	0.313810421753585	0.15621877533304	6.03493510313956	0.871023129700735	0.951387490667324
AMOTL2	2340.87939212406	0.674254062895432	0.14902566636498	30.4512567442908	0.00134547564302614	0.00576072858719373
AMPD1	4.73942294772487	2.65750173016976	0.937003962895389	27.1204158464752	0.00440659231410003	0.0159691418231657
AMPD2	1122.52119764132	0.530445842337621	0.152113529347822	26.0674512693617	0.00634158399250438	0.0216864521155755
AMPD3	1330.69606772542	0.439639319382718	0.241993546596844	4.25577670347485	0.961828764898204	0.99803954557942
AMPH	12.8726469916369	1.89139047032423	0.706940562539572	10.9391402377054	0.448375949999703	0.632611653003573
AMT	525.49320629424	0.558065328142128	0.213646817819232	20.2390846933482	0.042167632275071	0.104570538179742
AMTN	4.15022001828228	2.28533620534663	1.67964870266434	10.2287510870081	0.509935906654651	0.689484537859654
AMZ2	1057.62189591254	0.350769942140587	0.132329071712584	12.1761414941768	0.350549982574949	0.533114317978915
ANAPC1	1038.14450342839	0.349967038027552	0.135114813464183	15.6198678687305	0.15584006951846	0.293734302496725
ANAPC10	155.122300756392	0.688963486797715	0.250322260763325	12.4389083949244	0.331571672908504	0.513436645975518
ANAPC11	894.24504933496	0.422926126456249	0.17428649397684	10.8843891948579	0.452999088300024	0.637219890513243
ANAPC13	784.413519192031	0.321498173764659	0.189871163319791	3.66577996140865	0.978694645442012	0.99999999313501
ANAPC15	1058.57922331618	0.412394877087767	0.143292298288661	17.121548268748	0.104331273059351	0.215762169852496
ANAPC16	1493.56591852909	0.570641733226368	0.173662502012691	11.2420597493369	0.423212858294511	0.607921571382056
ANAPC2	1619.32143371668	0.428154459725792	0.174948844603812	10.5890438107688	0.478305494147439	0.660546771869551
ANAPC4	742.26939238769	0.493571737541755	0.145182767499623	20.199440387505	0.0426793704055458	0.105579697274566
ANAPC5	785.234879340096	0.447022802686599	0.13622908619504	15.9629587819836	0.142511603120367	0.274387605472744
ANAPC7	1229.07244451486	0.248113727757418	0.123630589714693	6.96733106967235	0.801722891108111	0.910017642266592
ANGEL1	272.095868659488	0.651930190500455	0.165648215485955	35.0877318596776	0.000239678026052669	0.00129361638773168
ANGEL2	1271.42658818413	0.581579456935306	0.137905706480298	19.8643671000032	0.0472358212271653	0.114752177707518
ANGPT1	79.4487979261922	1.86617444743603	0.421511930441899	44.0604255959444	7.09216609360863e-06	5.94804084758035e-05
ANGPT2	111.995336697147	0.853648131163194	0.338593215345884	19.2706160513314	0.0564054977360589	0.132615446194148
ANGPT4	196.338786189326	2.03772212448674	0.264643886658658	163.437786539009	2.63517735277494e-29	1.10617059335546e-26
ANGPTL1	453.915841333041	2.26844943748576	0.420885696921393	91.9170263541761	7.01348932491494e-15	4.55854181960359e-13
ANGPTL2	1594.48389295603	1.50458452554883	0.328807657938931	36.4187532950934	0.000144128384184723	0.00082901593289694
ANGPTL3	1.16668832413228	1.15902707003064	2.54611059392299	9.77991500088135	0.550286005537458	NA
ANGPTL4	719.810989701106	0.873012934197289	0.235208280780833	30.0604266888473	0.00155033822541286	0.00651421931977764
ANGPTL5	150.960762919987	2.5482212844516	0.520890287896962	62.2287992321495	3.56421370673045e-09	7.38081623606493e-08
ANGPTL6	10.6441482720751	1.32512172757278	0.752961402087643	8.57033796357027	0.661484683014295	0.814287321484301
ANGPTL7	4.25650345844045	3.5240253948225	1.34329934403215	17.4066266740503	0.0964098725294965	0.203048240994755
ANGPTL8	94.8518523329272	2.26232516990782	0.539213307185553	31.3341244932573	0.000974654192713065	0.00438226640391301
ANHX	1.61691115680682	2.24679065348675	2.05604193091138	12.4492750690441	0.330836732855728	0.512613759636271
ANK1	58.6200186933496	1.78276697357187	0.417544285241667	26.9687642019507	0.00464541349445241	0.0167083963762445
ANK2	893.390474437627	1.43135194695737	0.287918938068278	39.8804109614256	3.74995666812348e-05	0.000255954867567819
ANK3	2009.42259421842	0.45158605677854	0.14974133612974	11.9847712112755	0.364789011067384	0.548026676408942
ANKAR	50.9396059937564	0.895339118877234	0.401026365819289	5.64667554529342	0.895868915346102	0.965631478039914
ANKDD1B	5.22353759630788	2.70336889262294	1.01267272504446	9.40200406167463	0.584837958760803	0.754749249412119
ANKFY1	2231.87000025422	0.2166043892104	0.127560111271024	6.53660832362641	0.835273731696634	0.93034441238007
ANKH	1740.77766082057	0.383978564384197	0.156114657132498	12.3031929777505	0.341290054420875	0.522780394292702
ANKIB1	1348.8997114858	0.234525627661834	0.116202527812364	5.29030155422384	0.916296348735647	0.976436171497491
ANKLE1	61.2206120248637	0.915449246822093	0.286200565743015	27.2947695025115	0.00414656474071483	0.0151411984343355
ANKLE2	1170.63193558698	0.553850551126227	0.18324600940444	13.0272212221673	0.291549968043397	0.467017725983538
ANKMY1	58.694724152322	1.74337481088368	0.442122598026943	23.8159658568475	0.0135317900231879	0.0408773668931354
ANKMY2	861.003521554279	0.343852101141157	0.113247176418737	12.3409257485898	0.338570045667484	0.520275156357088
ANKRA2	583.601685755846	0.33771035759399	0.17031653946653	5.60374436057577	0.898453405499722	0.967176938120063
ANKRD10	2272.47095991417	0.506463039903417	0.1524959366443	28.1246802678766	0.00309796292789535	0.0118670827061147
ANKRD11	4712.05671424605	0.468043122744883	0.185145029931251	8.00163885266898	0.713157015649941	0.850713439602786
ANKRD12	6623.79625069344	0.671860148283223	0.198244271750177	16.1039724525914	0.137314623827309	0.266700631915987
ANKRD13A	3411.76221396407	0.635080198525627	0.0896494982513101	120.383058394145	1.51824920477592e-20	2.3352063532084e-18
ANKRD13B	309.242318135566	0.962971929843827	0.186683351969258	52.1446490420306	2.56675967334188e-07	3.19836986135841e-06
ANKRD13C	802.05318948156	0.366443861716064	0.138493398473987	19.229588696107	0.0570947776850723	0.133674491700735
ANKRD13D	486.428011843448	0.485455889767071	0.180433590062205	12.2196181324846	0.347363750578967	0.529868438974609
ANKRD16	252.823021035184	0.418444569748031	0.168313172379267	20.4540935493572	0.0394884816855465	0.0993697286726709
ANKRD17	2553.84345842985	0.237686656388733	0.154619700761461	6.76840363669447	0.817516521582723	0.919512135389655
ANKRD2	18.5389825062561	2.4989096334446	0.638175283726309	25.5608232275678	0.00753975604858546	0.0251271162128595
ANKRD22	1405.4628360397	0.865535663355252	0.216053583032513	55.0606939465449	7.55416218135163e-08	1.08642979152073e-06
ANKRD23	132.440401333968	1.13336089260837	0.319641443453238	13.7825053312519	0.245262856943423	0.412263394056314
ANKRD27	1441.46967495122	0.291931662912384	0.0987763718810976	9.98689454733272	0.531566383969665	0.708884179668064
ANKRD28	1045.17661665905	0.478479404231782	0.184461429004598	10.7031522877473	0.46845689461213	0.651095948785252
ANKRD29	271.900458516519	0.580687375075863	0.242213749109691	8.46052840914467	0.671552436108087	0.822114645827361
ANKRD31	23.7167337780487	1.63249458243309	0.620413111565435	18.5156519590465	0.0703613748116786	0.157874314151505
ANKRD33	27.603829468977	1.75453045475434	0.668509505999688	17.6032335225387	0.0912554223786353	0.193854033263798
ANKRD33B	294.102454637355	1.99887352703771	0.439669573083776	70.8677473348594	8.35358685309526e-11	2.5084414531001e-09
ANKRD34A	30.5529246184265	1.89931268165556	0.46848897520841	49.3379165902808	8.23005822875293e-07	8.86303812138657e-06
ANKRD35	2105.82639784315	0.455730074605521	0.215883615658201	6.07040196297203	0.868625730886359	0.950354208481365
ANKRD37	66.2348913509424	2.3810387631987	0.39646891658681	50.6884622172566	4.70540285141169e-07	5.43318980246957e-06
ANKRD39	293.189964100573	0.492540176062342	0.167654351008341	18.6300501441799	0.0680661762699222	0.153871290023816
ANKRD40	960.572035078494	0.226255306686095	0.105951230564294	12.0444565329691	0.360310860119196	0.543202657728521
ANKRD42	385.988451157405	0.364431519821778	0.160132140742764	8.80824538154133	0.639586932517403	0.797886728973894
ANKRD44	655.501389069127	1.38721564748907	0.187401386546785	98.2969907562492	3.87960827400103e-16	3.17765150865231e-14
ANKRD45	223.634306731829	0.933087315920421	0.294277400486338	9.24371262372017	0.599407647029204	0.76585828393151
ANKRD46	1130.4571774593	0.397423039167672	0.170043107797094	7.34075114574017	0.770855690003554	0.88916712261745
ANKRD49	537.497714206651	0.3781087630212	0.175849068124236	6.6161266182055	0.829264283873909	0.92651913362401
ANKRD50	1042.92373115053	0.509740060347436	0.187274032238819	18.6639350172466	0.0673992438304549	0.152678167621771
ANKRD52	1685.88022971146	0.385368447200548	0.183896875806205	6.03967866746518	0.870703686883005	0.951141696232348
ANKRD53	4.91859880851345	2.46614128514109	1.06921261379691	12.8022470222895	0.306446769514352	0.484510040720707
ANKRD54	624.179712303735	0.241452244829919	0.152574290729392	7.39048824950243	0.766637040890023	0.886815823143009
ANKRD6	289.79802199831	0.651867881224465	0.183536209391754	26.2234586687843	0.00601080538917463	0.0207525218962439
ANKRD61	38.7259800428182	0.986363955051534	0.396079029634593	10.4296891085841	0.492199941212959	0.673899263731511
ANKRD65	44.8352154421993	1.23805228089668	0.418280897368617	14.9050330804816	0.18688597819838	0.336438747682275
ANKRD66	93.8214366545311	1.34915790785929	0.366830774132724	40.5418299441353	2.88906518263281e-05	0.000203608864515105
ANKRD7	15.6150486277991	2.57446827035553	0.778214122076348	13.2002137122734	0.280441266633663	0.454344440193695
ANKRD9	158.814122629934	1.28950892927323	0.319241155239821	20.0940363633812	0.0440676000477611	0.10836198112794
ANKS1A	2092.60931889733	0.470337840309049	0.147542550475511	15.83810490085	0.14724839578017	0.281116915536729
ANKS1B	12.8488861418587	1.64062014845262	0.717050209193016	11.179916397701	0.428315951335345	0.612848892448222
ANKS3	331.955688301864	0.562807095186815	0.217970450808252	13.405932943348	0.267623511535749	0.439223436827712
ANKS4B	253.737063070991	1.24786212691658	0.731260165692799	2.22957676068148	0.997513113576981	0.99999999313501
ANKS6	135.557102218487	1.04206046378256	0.373583839980356	21.6507493283528	0.0272229032470557	0.0733405906571635
ANKZF1	811.755915803602	0.346904537225395	0.13623021466205	25.5978470504113	0.00744535397486392	0.0248577360794587
ANLN	1096.33377923166	0.82362436931454	0.219748697658579	40.5788277340333	2.8471326760194e-05	0.000201075626670575
ANO1	410.254349914401	1.88583722214654	0.356163606600974	69.6100701533567	1.44892504707989e-10	4.10471261908215e-09
ANO10	1047.42431044824	0.530261489515291	0.221101101575536	5.08822536030834	0.92681865786305	0.981512369768737
ANO2	51.7060260403926	1.36262067952015	0.375452395625122	17.8002131278242	0.0863336509644077	0.185451677322159
ANO3	359.790993756946	1.27035067502882	0.291285120203455	50.1822883962627	5.8043019626605e-07	6.54659612025845e-06
ANO6	2055.96466345732	0.458471855166108	0.163623272515986	14.3335543088975	0.215082890663764	0.374111288327364
ANO7	41.5683110687214	0.951208369950528	0.39750151417283	10.1112426694506	0.520409461617809	0.698582960835259
ANO8	1040.39574680383	0.459422661844514	0.193559323426445	8.08390150392523	0.70576891189347	0.845806090866682
ANO9	1816.52010812337	0.709234245191811	0.230306409721436	22.2468142557599	0.0225293641418583	0.0625784612757517
ANOS1	639.341621666587	0.383296841219049	0.222367610340096	8.02956956462384	0.710652601319382	0.848881862934801
ANP32A	3343.30360904605	0.325756262149019	0.115467357420699	20.6242131600108	0.0374799933661394	0.0953756486908744
ANP32B	4443.49503395756	0.494887291032975	0.115769832491329	52.980520235584	1.80994286838358e-07	2.3588451350982e-06
ANP32E	3878.87495636023	0.406437432907863	0.148097650247555	31.2376658711016	0.00100975060410793	0.00451048161112851
ANPEP	3082.96241827659	1.31589239206485	0.323926191029952	29.0448375291008	0.00223387881944538	0.00893187480495709
ANTXR1	4533.92079660942	0.965492459337922	0.192919795467689	61.127399632241	5.72073169859012e-09	1.12455632190139e-07
ANTXR2	1401.55874774531	1.34444714318486	0.294001234023792	39.148610763196	4.99798459611562e-05	0.000329314557315676
ANXA1	15911.2200289475	0.640955937528718	0.200801427886318	12.8547629936777	0.302923976266865	0.480221494712908
ANXA11	2411.05214685955	0.962344363781966	0.184585351330917	47.4717690810066	1.77298267545068e-06	1.75633372309025e-05
ANXA13	55.6389950073179	0.985660110093962	0.303434051904594	28.7168718554808	0.00251113036132274	0.00990733613673231
ANXA2	32101.3531360622	0.406831040923981	0.131702174014011	14.6559785872729	0.198794235470165	0.352287163631341
ANXA3	803.244891569119	0.450667349085114	0.183937893739268	13.9698360788703	0.23466706908724	0.398710411926706
ANXA4	3654.14732109662	0.513729174791423	0.181565546978235	13.5622040122788	0.25817150256487	0.428210207867927
ANXA5	4634.43879532745	0.915761832646929	0.236534328036523	26.1125856805182	0.00624414137076554	0.0213895281332123
ANXA6	1329.34086002735	1.3564187471278	0.255258413574726	63.4781528983087	2.08058366866229e-09	4.56663184530246e-08
ANXA7	3404.82580155535	0.574513722889921	0.165477634909022	21.297443051327	0.0304171934693561	0.0804510411149981
ANXA9	946.604116654348	1.2556787767426	0.270351731341401	46.8119948066657	2.32220416761515e-06	2.22069728397141e-05
AOAH	61.1049636807179	2.05274780959098	0.493785717176279	34.585687572883	0.000289947233912574	0.00152099630723886
AOC1	68.1051111962124	3.37646172748221	1.07053117883896	17.6673301748348	0.0896276824727668	0.191162080464039
AOC2	142.015736843651	0.967390551802242	0.294505346667394	16.5855635622598	0.12074620862969	0.241408549085099
AP1AR	1184.53823818291	0.564480297549555	0.16870375420832	16.5760397513727	0.121056692187064	0.241933276222689
AP1B1	1655.05194581389	0.882032166579191	0.156846260302007	34.9794284526044	0.000249744652959529	0.00133903805547673
AP1G1	3413.99876097826	0.272756551090622	0.102237539633504	11.9459176932356	0.367722132586458	0.551200211983674
AP1G2	818.93964281745	0.594301074979015	0.153234309030955	31.4229957705002	0.00094336906069553	0.00425709814198303
AP1M1	867.91857884083	0.506603204828002	0.133994214326405	21.9585712166516	0.0246961695171494	0.0677011047076251
AP1M2	1005.17790157678	0.761876957507895	0.199672369474214	14.5495149347808	0.204062798273172	0.359955904263324
AP1S1	1465.89144520812	0.350037432261213	0.138232119965689	9.5840336189782	0.568145230380794	0.740608542580928
AP1S2	1622.62440347725	0.627758645710479	0.167873106522379	14.97033814246	0.183858895436562	0.332427573954711
AP1S3	385.577817959295	0.486437501696764	0.167419237314626	19.1578854602712	0.0583176280644778	0.135905839448434
AP2A1	1509.92839400477	0.743228309248947	0.150620815096544	27.7439043521205	0.00354279790171598	0.0132807134738001
AP2A2	1745.18267945259	0.590303984122475	0.151531686437999	26.3457058273913	0.00576319158930046	0.0200142273927637
AP2B1	2598.90103709339	0.277484114122261	0.100349163339255	13.8412142806567	0.241904626728435	0.408219122608981
AP2M1	5393.47608396126	0.454390140017982	0.12361595513154	17.1807725348037	0.102640932602987	0.213185460366723
AP2S1	1465.82464621589	0.754775575346609	0.148927963406295	31.2881664729233	0.000991225649782443	0.00444221655192759
AP3B1	2267.52212405822	0.307230439493448	0.126199523100231	10.6673572318103	0.471536952708814	0.654072737641701
AP3B2	5.30605112514425	2.98881989358352	1.86504722802661	16.4758443926247	0.124364327194074	0.246975835662666
AP3D1	4092.42093817581	0.305943509848096	0.102121569139966	27.7354565092827	0.0035533317168777	0.013315246561906
AP3M1	2463.52539597742	0.439131479913803	0.13561221260559	9.26648886768555	0.597308922405402	0.7641867723377
AP3S1	930.018397015609	0.560340754424744	0.235543564905618	6.63280404509322	0.827992827916253	0.925611822552407
AP4B1	906.037594535668	0.336612079869479	0.137293468533954	7.89401529026634	0.722765186761273	0.857756846981557
AP4E1	2622.30132068797	0.339897295322381	0.123466922235426	16.6728445458702	0.117932113974303	0.237052490469697
AP4M1	551.426884829962	0.326262427958625	0.16130081981116	9.64551064288111	0.562527096626911	0.735404578494347
AP4S1	365.076981387696	0.500021882433948	0.159918839855364	31.4488573122725	0.000934449825129867	0.00422441766357229
AP5B1	584.658533247536	1.14895990412983	0.226496584851503	32.2019943381185	0.000707825650191149	0.00331905492801989
AP5M1	1696.02429125997	0.496680749876552	0.172085292720382	15.2991912026799	0.169205434736824	0.311894639512604
AP5S1	202.951798858317	0.366943389650284	0.177098489296219	14.0963985971218	0.227705180717191	0.389840401586429
AP5Z1	1150.80407783075	0.379899441815882	0.201369589624155	4.58594170325023	0.949551916314104	0.992556628025154
APAF1	1090.20442310337	0.605699529361956	0.154653941472166	17.2242551733129	0.101414959977017	0.211227003160731
APBA1	174.117079572972	1.15792515656259	0.289688630661149	33.014956398174	0.000523234622592286	0.00254549875572166
APBA3	564.153473770271	0.440444222337952	0.144652622351193	18.3626674546696	0.0735380312766978	0.163471371462497
APBB1	725.492335939529	0.644777900124732	0.193647124818547	12.1780423504827	0.35041029693539	0.533022578359594
APBB1IP	278.072006635602	1.46106633415118	0.411630288691641	24.181415298639	0.0119896736571681	0.0371147541125027
APBB2	1919.76475852807	0.424451969564856	0.14846900674075	17.3818054359133	0.0970782441909553	0.204135831997867
APBB3	582.601289704862	0.412484482141569	0.19322265127528	10.0250302324964	0.52813707617915	0.70573274446351
APC	1551.17060603362	0.285443475749591	0.158588888175688	12.3940946138312	0.334760838234141	0.516667646846397
APC2	132.227272994728	0.580496801397841	0.288562287398947	6.0474913933499	0.870176749724534	0.951027506370092
APCDD1	9503.37682671797	0.587302337159865	0.118108003128835	38.698896890964	5.9589875892595e-05	0.000383113085309475
APCDD1L	833.106764870396	1.96837600055003	0.372969637737496	38.5560420793896	6.30066090722401e-05	0.000402511149713559
APEH	1305.49387944722	0.337822575284337	0.132729919966362	11.7070915186592	0.386058051784362	0.569947437797193
APEX1	3042.07587881201	0.51014784661777	0.134061281297792	22.5549781726275	0.0204095400218563	0.0576439335436477
APEX2	344.033551126815	0.419863009927862	0.161877492739313	9.31521179407468	0.592821711673795	0.76075202935537
APH1A	2072.85605223439	0.362524813547395	0.108873326352939	28.8772191090277	0.00237166737841403	0.00941795940237769
APH1B	374.639314018756	0.770856910522184	0.202014289007099	23.8731876788004	0.0132785604420922	0.0402997009109377
API5	2903.42932813417	0.503197301289356	0.119188148905356	19.4314384340334	0.0537752386061001	0.127487620034629
APIP	656.503600310998	0.66409494862504	0.218532330647813	21.3783150876845	0.0296568594658816	0.0788020653274494
APLF	318.056470520237	0.566406102458216	0.255487380242612	4.10575220937272	0.966720692804548	0.999356381884913
APLN	154.466459564018	2.60692386309314	0.437125604518245	91.7645109365328	7.51417788686341e-15	4.8233871423193e-13
APLNR	387.541738632091	1.47620196320541	0.360365789412215	46.3262328033532	2.83115256781713e-06	2.6434148790059e-05
APLP1	404.451125944196	0.586539171917788	0.159831460278103	34.9518973921087	0.000252368833775753	0.00135095101799884
APLP2	11204.2961241312	0.339743839882656	0.112829001914996	14.6587261857829	0.198659687304155	0.352154089081215
APMAP	2339.5304991657	0.278749129387806	0.115005093227705	16.1549344038262	0.135475767041038	0.263917744378794
APOA1	655.38231358671	1.82285391710268	0.307288387851784	81.0500365920857	9.2428745214081e-13	4.26166312887533e-11
APOBEC2	224.706725101642	0.162244844300116	0.170441954134622	7.58513369926959	0.749914051599515	0.875334157437066
APOBEC4	0.15929997371754	0.139808662036329	7.21488471645882	0.469005756450265	0.99999902134337	NA
APOBR	603.189638020066	1.16706518729011	0.292032170133684	35.3389797476102	0.000217828849200226	0.00119170064690072
APOC2	13.1318346342831	3.65368869439437	1.0106053705793	25.116080210507	0.0087665446084831	0.0285220583426976
APOC4	1.08161550999514	1.5429334599869	1.86103956146251	6.79845863605571	0.815161944812448	NA
APOD	10936.0308504325	1.41615577981464	0.297158983748456	63.1260778524193	2.42179689339627e-09	5.16368101640649e-08
APOE	3565.8899586231	1.14195443214042	0.213188204272818	58.0006305799949	2.17539018785274e-08	3.66487766680977e-07
APOLD1	121.399097368308	1.299551896431	0.400721934304661	15.9010518434699	0.144844231915244	0.277605481676045
APOM	166.223179858276	0.504773717656754	0.203300417779409	5.10984097900422	0.925730479755206	0.9808071525631
APOO	474.164340542775	0.74072273628429	0.170416982881123	25.5130978930972	0.00766312678938321	0.0254540622616687
APOOL	479.475448896303	0.620419279742874	0.248015613868746	13.4107469360632	0.267328670982555	0.438788689954143
APOPT1	638.827370396989	0.230100376711231	0.113902173017903	10.2057894538866	0.511976871721958	0.691084744980621
APP	15320.255677557	0.447782095616111	0.114071831037042	29.7045705478059	0.00176290474130276	0.00726874790893626
APPBP2	3019.0903164563	0.4271848598293	0.126928377178754	12.6986578012344	0.313476380042676	0.492417212246034
APPL1	3387.18603782071	0.69777695817742	0.152482808857644	29.9518986064726	0.00161238755163106	0.00674164697609758
APPL2	1787.02969262984	0.614353305925858	0.157948840557816	20.6554839627948	0.0371211444670226	0.0945938965304209
APRT	1029.33982323387	0.63189889431589	0.218920621813467	35.1463134516168	0.000234399498387697	0.00126976227041242
APTX	309.559852641836	0.349654718319678	0.161658325698381	13.8647856631853	0.240565967879588	0.406402589654215
AQP1	8561.25595785292	0.958664027439917	0.2029307754123	42.1405491589779	1.53144508465216e-05	0.000116310165890148
AQP11	45.6632663046871	1.0795559949476	0.489722419167498	11.9906851718371	0.364343795274057	0.547496433516645
AQP3	7663.32351805276	2.14235719192083	0.249486601358646	233.910632678698	6.47251131342743e-44	2.60829260908499e-40
AQP5	434.832485316603	2.91217693509037	0.443245948977626	117.356214539586	6.16196855457974e-20	8.4460887351175e-18
AQP8	652.852750598516	2.17087998897713	0.403502565535194	91.8539503495871	7.21639207655404e-15	4.67534031995136e-13
AQP9	1094.94198400419	0.614563131971965	0.283422938939952	10.009511444353	0.529531791350601	0.707060043997565
AQR	1779.00196430214	0.564693333486107	0.186458339185836	12.6703332846107	0.315417117801061	0.494578949927905
AR	920.859249547856	1.52698227371038	0.282981157077764	50.0907825287392	6.02850243489764e-07	6.75574502562584e-06
ARAF	903.752302422504	0.345219722375414	0.111685778860221	28.2158664351015	0.00299970074093396	0.0115367379708109
ARAP1	1713.53673543599	0.519647637791569	0.173824999967457	10.7176355915079	0.467213131189596	0.650039868826071
ARAP2	3237.3417829656	1.00877923060242	0.22409376614289	58.9914894592805	1.42643882885501e-08	2.51015859935367e-07
ARAP3	549.809484233132	0.59558776995786	0.218703938362412	32.5119758444508	0.000630972932548017	0.00300697105437795
ARC	274.63030860683	2.30002417998171	0.380351983599223	44.4731931733785	6.00423266830313e-06	5.11973271407701e-05
ARCN1	4514.70886242562	0.347586461511765	0.115071664124637	10.7617649223173	0.463432425264228	0.646744697094399
AREG	467.896042794698	0.790668406379802	0.232010211031725	28.1284757918111	0.00309381178920474	0.0118556891861328
AREL1	1416.91915872693	0.228322285842329	0.100182951638774	17.8694833243985	0.0846588890695259	0.182517687594655
ARF1	7049.15673794629	0.364489809688177	0.0878606546681458	21.3242448139389	0.0301632397805547	0.079905221974546
ARF3	4222.78344450269	0.768466327892415	0.154515402654969	26.9496432464492	0.00467639151095812	0.0167958311148476
ARF4	2101.58600449195	0.42816783458301	0.142538903375218	16.259822084325	0.131755885104261	0.258571084928973
ARF5	952.757417462987	0.637085718631367	0.140322681277164	30.0792361882981	0.00153982188130861	0.00647316317264495
ARF6	6142.74178331108	0.392682562230555	0.0981958841712916	60.270174536122	8.25995938013018e-09	1.55396752147753e-07
ARFGAP1	1207.07344897206	0.51298644646799	0.188074982852608	8.07095938278491	0.706933631281903	0.846643793652911
ARFGAP2	2431.61830976848	0.536861267592904	0.224901759606642	3.59745179055687	0.980250430469641	0.99999999313501
ARFGAP3	865.27610206877	1.0634301388777	0.242034326827607	57.0042424059889	3.32134000094433e-08	5.29862863650256e-07
ARFGEF1	2729.07041357734	0.211783002565342	0.109260684654955	8.82906033896205	0.637667303498747	0.796300691991642
ARFGEF2	1935.79488171858	0.219193183753513	0.147475031461575	6.31451121089771	0.851576692802328	0.940110267938255
ARFGEF3	592.909794176029	1.35631569244936	0.324283578588031	54.8930825899068	8.10700403968618e-08	1.15767558040848e-06
ARFIP1	1442.74861494539	0.421236798024526	0.155280792104438	17.7224419921966	0.0882484267473794	0.188719757008379
ARFIP2	1054.87297229886	0.828011248508951	0.149175622234526	73.9639569115562	2.14114243656894e-11	7.36209538471459e-10
ARFRP1	1662.96968570701	0.303767164693141	0.153826911701376	10.902601175096	0.451458823368096	0.635803720699222
ARG1	62.0002082202918	1.67888604439334	0.300668637328186	72.4608701209645	4.15032381180561e-11	1.33586061476152e-09
ARG2	110.105095901576	0.643266665801341	0.246215659641714	15.3098664451451	0.168746014965551	0.311304106898085
ARGLU1	5509.47536325623	0.41763190534762	0.155797058272625	17.0962039750341	0.105061924671146	0.216961434887661
ARHGAP1	1890.55499181238	0.562747657636566	0.160407249526116	9.92208902806055	0.537408665293885	0.713437352220165
ARHGAP10	1362.23456105326	0.288523830446198	0.121888614765987	8.7963892365936	0.6406801568334	0.798877683027179
ARHGAP11A	523.411114890448	0.703383981130849	0.296914580167985	30.0478365706627	0.00155741614245384	0.00653756755136309
ARHGAP12	1225.32579939833	0.323655144466795	0.141308835566865	11.2251315640454	0.424599865668148	0.609305796834094
ARHGAP15	44.6432120394609	1.90204859345857	0.671663535352859	14.4076950239242	0.211249039528133	0.369067623120815
ARHGAP17	1314.63469511271	0.350804487752241	0.101149610884308	11.2660659280265	0.421249930421736	0.60611275317591
ARHGAP18	961.681065254115	0.520358596327082	0.143472878921066	19.9571534439912	0.0459317512871935	0.112138477727573
ARHGAP19	506.989820206843	0.617344163488694	0.158198266600216	36.383268164115	0.000146106078952481	0.00083776078110801
ARHGAP20	211.870480675693	0.617924983402688	0.296381379527338	6.13642320309248	0.864108264552874	0.94782428092919
ARHGAP21	2333.48600277801	0.421113128735631	0.147800832298943	15.4797366448489	0.161570504379629	0.301561911714157
ARHGAP22	67.0485518839729	1.11969397568056	0.395003314529279	16.8097922374919	0.113629146938527	0.230148138486569
ARHGAP23	1992.56736977894	0.651110053088532	0.172261815517627	18.7987318705925	0.0648034049630908	0.147923848034589
ARHGAP24	533.828301962113	0.811390182682633	0.183726129526564	73.2368617579152	2.94974977024052e-11	9.79151698856281e-10
ARHGAP25	270.114121153712	1.03571569497241	0.219071806402997	41.739214965686	1.79697844665792e-05	0.00013439984677695
ARHGAP26	370.715948785045	0.425511847184591	0.188645412915067	13.6672686162632	0.251954590833591	0.420703824538495
ARHGAP27	2088.45655761054	0.662910740981329	0.139208251569122	43.7006958752195	8.19751912097855e-06	6.76656340715268e-05
ARHGAP28	913.16025552426	0.587644388282432	0.149999163076164	22.9560573810635	0.0179290280508327	0.0518913689544253
ARHGAP29	3235.17556649912	0.466390925274054	0.14277889590793	20.0450407357706	0.0447267917310586	0.109635051896484
ARHGAP30	783.411936626026	0.620427415432607	0.220459159713233	23.6135131118141	0.0144647429685587	0.0433135526132291
ARHGAP31	1260.97075892442	0.723733566219979	0.196549728951949	40.7944642495817	2.61439513599666e-05	0.000186402857732472
ARHGAP32	2357.47718507177	0.676326119023275	0.129069660305525	54.3691757997346	1.01072000169598e-07	1.40254802439204e-06
ARHGAP33	138.991485568801	0.551416781076602	0.291086913198012	9.29027786257967	0.5951176121226	0.762496805713993
ARHGAP35	2741.65254438488	0.354272851883628	0.16548635433991	10.0426665134154	0.526553399794584	0.704313912551855
ARHGAP39	896.197099522169	0.655039874619258	0.214717442840044	19.2863201662166	0.0561436479818058	0.132092289022116
ARHGAP4	252.687878382332	1.08639200732428	0.259156241353874	18.2569851533779	0.0758060237776242	0.167443057782871
ARHGAP42	1263.39527260245	0.538435560178422	0.136965598918847	49.6321315059119	7.28817354078756e-07	7.99833380573684e-06
ARHGAP44	30.8947409973916	0.869148840193761	0.404845055756945	8.67173458543442	0.652163437354662	0.807448918652401
ARHGAP45	473.626383559622	1.39722223319207	0.229871735354895	58.6789491239292	1.62975020804985e-08	2.82526108982807e-07
ARHGAP5	4319.4210072428	0.603738242621008	0.180877357298053	26.6484579682011	0.00519124084619818	0.0182772480141377
ARHGAP6	189.118084918024	0.801951634308997	0.289595256096856	13.812304987926	0.243553984920401	0.410075143491365
ARHGAP8	219.380426858899	0.879825195981381	0.302376408808884	28.1378584307452	0.00308357302277904	0.0118187013193789
ARHGAP9	96.6277732820412	0.878326889104116	0.316715844501045	22.0409532190355	0.0240578862593052	0.0662487836871313
ARHGDIA	6041.72730986944	0.586784594823457	0.168885178436937	9.44613653614306	0.580783832866065	0.75126291879661
ARHGDIB	810.898109665967	1.49575852010375	0.260575233028957	66.215468182299	6.36142941578685e-10	1.56879397220174e-08
ARHGDIG	75.407405509709	0.915681170055038	0.293716780685315	30.0172853527018	0.00157472174295773	0.00660059671288854
ARHGEF1	1926.41717654254	0.398390741440113	0.147465915248887	9.64773321754484	0.562324194809622	0.735254393330244
ARHGEF10	1526.71359342609	0.381786689406445	0.156208800510668	12.1306067345048	0.353906470106799	0.536679571474516
ARHGEF11	1325.88356849577	0.365259262954905	0.170596841800732	7.07007278885823	0.793380793255304	0.90443166072425
ARHGEF12	5868.73791397892	0.161347888304777	0.134022204509767	5.02341856654664	0.930027158736401	0.982829586910174
ARHGEF15	403.947415753561	0.643324786481467	0.184119498156793	26.1564125611067	0.00615089074367196	0.0211239641374205
ARHGEF16	285.824719140493	0.894349639344223	0.268532006342487	20.4037956703752	0.0401009008164487	0.100571701587083
ARHGEF17	1389.91219408462	0.42031865624531	0.202197594505539	4.6864437269391	0.945396203900227	0.99014435046402
ARHGEF19	1472.19603401752	0.847384333415754	0.226434756034413	17.8014650454136	0.0863031275551183	0.185425646951171
ARHGEF2	1254.9637901045	0.343457099640449	0.113806528580137	27.2042335831504	0.00427969425873614	0.0155540331203597
ARHGEF25	678.520652411768	1.19211557547035	0.2295266086752	48.0500672312771	1.39862262422891e-06	1.41399133244297e-05
ARHGEF26	602.146288248088	0.585848372155553	0.151053013358704	25.6710845885132	0.00726192106957649	0.0243218829173698
ARHGEF28	1086.85389749245	0.836375396634917	0.208564070519634	17.0635109957782	0.10601093011319	0.218480231715204
ARHGEF3	814.745977080561	0.779024338792163	0.163883321997597	24.9471696577978	0.00928039498014232	0.029969497108092
ARHGEF33	11.3944420681371	2.16129963714252	0.679247521271277	10.6325168833253	0.474543148374571	0.656701229162035
ARHGEF37	2564.40534796057	0.399371737422145	0.142416778908426	15.0323708105083	0.181019770482615	0.328473284893211
ARHGEF38	11.4902566350405	4.35991764264713	1.01639560279686	14.1621015727477	0.224153184939799	0.385594000115428
ARHGEF39	331.399866079083	0.725356499365836	0.232073869159774	21.5307766929233	0.0282710242514122	0.0756849642114207
ARHGEF4	1178.92356106194	0.806763830779559	0.16464823755739	45.9464217396547	3.30460952057524e-06	3.02657169227593e-05
ARHGEF40	1416.28315719198	0.870098550977561	0.188135670453009	27.0716534514862	0.00448206928807456	0.0162076837913522
ARHGEF5	2650.33645920066	0.453447544910006	0.157357675820382	14.1846277409469	0.222945129197523	0.38413899505737
ARHGEF6	1229.34201572566	1.13219149179661	0.185596351378616	111.987956491172	7.33805679165658e-19	8.9608791693993e-17
ARHGEF7	2803.40071731041	0.399638701140805	0.153048157596053	31.4333896461069	0.000939774481875717	0.00424372838084129
ARHGEF9	4.5031156484824	1.77219797347381	0.923547123746065	7.65430378469156	0.74389518244527	0.871405384929127
ARID1A	3624.97940713943	0.28661066306603	0.129536422751383	8.46236563226569	0.671384261215557	0.822054051970847
ARID1B	2587.13270446179	0.270512859847135	0.0941233957473538	29.7038774328389	0.00176334506818604	0.00726874790893626
ARID2	1213.9123668002	0.37016769072169	0.16722981400674	12.7711033786726	0.308548929139764	0.486764200848505
ARID3A	707.080775734681	1.51509607074527	0.246633990392871	53.4652716458031	1.47731204352363e-07	1.97128214337467e-06
ARID3B	109.486666973486	0.767319993400284	0.254935014925318	22.0425877001491	0.0240453791292459	0.0662233931212651
ARID4A	1591.97073352979	0.571277412806257	0.17465470954685	16.5633162003186	0.12147254548484	0.242499783907069
ARID4B	2402.33655303434	0.391191125955923	0.137476408860413	17.8082051177732	0.0861389579171632	0.185132145394445
ARID5A	182.471661416661	0.72736081561807	0.31563278853313	13.9633235790593	0.235029584952766	0.399259009123454
ARID5B	2450.63144824735	0.499490237837109	0.145082241252277	28.1551714949423	0.00306476576149935	0.0117600391027329
ARIH1	2718.8932553083	0.451529327877886	0.115331651396547	42.8617419348928	1.1479467838792e-05	9.03867907322473e-05
ARIH2	1590.0897369296	0.281842433135324	0.0905853216064732	14.9019622312566	0.187029289445031	0.33658924196391
ARIH2OS	71.7192827689196	0.790560949616029	0.279750393940527	16.5734707574762	0.121140559170087	0.242052868575773
ARL1	3132.85382549245	0.286638545115242	0.12966377110471	11.0113162874111	0.442315720120314	0.626354104885729
ARL10	413.365081892381	0.843190220040545	0.139307749513414	61.1737950867948	5.6079910847501e-09	1.1045494854998e-07
ARL11	6.79988623945929	2.53933436561052	0.872855945545806	18.4388248877264	0.0719411074493755	0.160560630704194
ARL13A	2.43404036169348	1.04785783900347	1.4862404847292	4.88606451422334	0.936558465994462	0.986343117882209
ARL13B	402.5247677387	0.581201960465795	0.153661098826189	31.1330363248842	0.00104920738659623	0.00465546787767617
ARL14EP	746.833742563183	0.364178729418347	0.153438190437697	9.84474068345429	0.544404666183503	0.719669965813633
ARL14EPL	6.70686706471067	2.78321319966489	1.19389011361245	9.63725822215915	0.563280602828447	0.73597956464499
ARL15	1805.18344838763	1.09514674784467	0.201919435986077	88.5657050060545	3.18254746630183e-14	1.85869996807292e-12
ARL16	596.236303829893	0.292259121476756	0.118081741054987	7.21234643295691	0.781635722276574	0.896850480817323
ARL2	641.927995866208	0.619582502275834	0.224105014863532	13.4588016075764	0.264398273832043	0.435277458897119
ARL2BP	1812.18530862821	0.361131313955853	0.117404390368774	14.6333146646272	0.199906796675473	0.354009671841634
ARL3	1023.64830011836	0.32710588525739	0.153424173210775	5.99579945062675	0.873644379187439	0.953047459843501
ARL4A	1148.31501682622	0.43254526696619	0.20655231430422	12.9036888162755	0.29966687130555	0.476182002360846
ARL4C	1372.34972657261	0.534381845293401	0.158653092441346	31.7923270206754	0.000823488707689013	0.00378270423594476
ARL4D	764.255781738437	0.598971926555042	0.24168388939937	9.91255404084762	0.538269766236067	0.714071636699483
ARL5A	3938.65236485963	0.544632951299162	0.150758616472751	13.5273800995723	0.260256556132179	0.430499084599563
ARL5B	1442.19879203658	0.857681926395638	0.182225537400471	55.6370502259755	5.92355877304306e-08	8.8410211642996e-07
ARL6	248.337682876658	0.647368933132378	0.207612922210821	20.0725591779931	0.0443554598941233	0.108923602852735
ARL6IP1	4190.56044647669	0.54247073601028	0.122016505512767	32.9575185457235	0.00053456674232792	0.00259479289115039
ARL6IP4	723.950161238805	0.423099903297319	0.189145800121387	9.34012188385498	0.590528973456494	0.759369984439014
ARL6IP5	1351.07243330526	0.646925412214654	0.170187955115884	26.9802788581142	0.00462685347480695	0.0166505573609368
ARL6IP6	963.816371126617	0.53898885581841	0.149189604076622	27.0570505980966	0.0045049124579542	0.016275682466437
ARL8A	441.707908261435	0.276767161957299	0.144701139755345	7.76917668340877	0.733819323353556	0.864662312646246
ARL8B	4417.48793340529	0.567097880365095	0.118032311510542	50.6995681093927	4.68376213353439e-07	5.41440752889182e-06
ARMC1	1716.82974065154	0.379504007689681	0.118545168868815	14.2581683237591	0.219035735460846	0.378860935170451
ARMC10	977.481595350831	0.696569561224681	0.210332754176933	15.168625964711	0.174906586334745	0.320032038508788
ARMC12	147.581352226748	2.72501022634013	0.40219546409822	51.7563248379812	3.01797386783198e-07	3.68094161397981e-06
ARMC2	96.9896273237218	0.715894720496398	0.247928711521989	16.2882885561075	0.130761219232001	0.25696945345807
ARMC4	9.0626846953618	2.78949110398738	0.958077222370982	15.5857128624928	0.157221218516892	0.295618731979923
ARMC5	578.408585892885	0.539077285141695	0.148452058176641	13.3428221257369	0.27151041809061	0.443975571413457
ARMC6	367.761612617838	1.04324645573214	0.209145916219712	41.280810226689	2.15606863439903e-05	0.000157229920066978
ARMC7	625.319891512215	0.502886000187749	0.166718472722793	30.0270426140435	0.00156917465198472	0.0065800832596962
ARMC8	1317.66296644866	0.279081506463054	0.112337758672471	10.5331730223306	0.483158806996529	0.665106702341536
ARMC9	181.946565641809	0.846412051829159	0.222911135449377	21.9394295540591	0.0248467122900704	0.0680674923089909
ARMCX1	691.836263100593	0.715474121642092	0.13444705915369	56.9728131080016	3.36590131431765e-08	5.35699412181567e-07
ARMCX2	657.04467569754	0.754872033825351	0.175349827705213	36.2251989199954	0.000155243667576243	0.000883617135026476
ARMCX3	3336.06006849799	0.276087907480411	0.143297833578695	13.590350924795	0.256495128020707	0.426236728617668
ARMCX5	434.271389855793	0.461113333587115	0.181415744230658	4.31297791327012	0.959851609187031	0.99733532272074
ARMT1	481.900628393558	0.570675504861065	0.227742605035981	9.15717622602017	0.607386829342314	0.773006393659569
ARNT	1731.99100247457	0.324728251045037	0.124096294110721	7.11470005612586	0.78972021589614	0.901993800243258
ARNTL	566.308961646083	0.480699137052746	0.121771531912458	45.4358441110492	4.06639080769629e-06	3.63342387513404e-05
ARNTL2	37.2460956420403	2.56692768539723	0.627288536104855	24.141252408822	0.0121506577460349	0.0375151092437722
ARPC1A	4795.22666681115	0.389474986710804	0.0902976463195026	61.6944200198104	4.48471560792321e-09	9.03625347840447e-08
ARPC1B	3407.89507568143	0.488866570129921	0.171497435677124	13.8739620401725	0.24004632007509	0.405728823353157
ARPC2	5684.08112122432	0.447355188112664	0.135876305926226	7.70449003525232	0.739505106512963	0.868973281282772
ARPC3	3055.53577020801	0.415262243969915	0.156041968369181	11.0851878268286	0.436154364938043	0.620580521621647
ARPC4	2839.88847204159	0.515097822491155	0.111668880358611	32.9099004410509	0.000544142527302748	0.00263366028888375
ARPC5	3922.63009251633	0.319568475214513	0.136123816456756	10.3436412459869	0.499766880696208	0.680254197064642
ARPC5L	1800.64463520568	0.487955367497102	0.132325149075143	51.1115231418173	3.94706831408097e-07	4.6535681369466e-06
ARPIN	975.307394280653	0.408755636168349	0.163896481670081	8.29168847912223	0.686961012757005	0.832876674050238
ARPP19	3588.48033881656	0.412764965257314	0.144412805850671	15.465211934551	0.162174174516968	0.302447930612957
ARR3	2.7357259041261	2.25080643797648	1.15387575589326	12.3522011880759	0.337759930175231	0.519347133173133
ARRB1	1413.13362027775	1.06962485454987	0.206461955950469	70.78502281162	8.66209010592622e-11	2.5933499783701e-09
ARRB2	327.032116395097	0.850526624987922	0.189221619832643	28.0528662676019	0.00317752305688008	0.012126903026803
ARRDC1	966.598297807063	0.787424775244086	0.18643896255403	23.4869218105983	0.0150785330186626	0.0448836403889841
ARRDC2	845.189771769916	0.420697031457318	0.151854929709826	20.4419903409543	0.0396350620609794	0.099639034992723
ARRDC3	5284.43317618454	0.547140151721319	0.179776694501713	16.3561421072787	0.128415718561246	0.253274110541361
ARRDC4	3389.52563308689	0.68847141038455	0.13969164209166	34.9210923159761	0.00025533705569278	0.00136466481038563
ARRDC5	106.526665470734	1.29346313538268	0.312585484790109	50.4838447860678	5.12231672521227e-07	5.84824576821805e-06
ARSA	485.018388842732	1.20634875093765	0.231865667650032	44.8587377066312	5.1377108204452e-06	4.46570425813328e-05
ARSB	658.712774407686	0.679891445719156	0.181710808098723	27.8545317539319	0.00340759434732332	0.0128479825045317
ARSE	166.148361612567	1.51498275003129	0.367031123233523	36.7493722714047	0.000126918978418797	0.000741888742721303
ARSG	147.543581214065	1.08064319887605	0.245849125247268	47.2059613410599	1.97679444640695e-06	1.92696813259089e-05
ARSI	50.1388252902384	2.64601657466938	0.570041258551486	18.145243876066	0.078271054719123	0.17155264674596
ARSJ	316.48413240978	0.749810156091211	0.226009676222541	16.6131460556355	0.119850805487443	0.240023246174982
ARSK	162.66779923448	1.31728377928961	0.398764128764547	24.0849782365883	0.0123796580444467	0.038058854125352
ART3	19.100952577928	1.42186437374514	0.667398101912111	8.03512600691064	0.710153872875755	0.848587972042083
ART4	14.185478735486	2.86363825313818	0.927008370386654	26.0506010880695	0.00637833333173785	0.0218010243089374
ARTN	26.2755787107308	1.5163547941644	0.608537410511953	1.97546338640564	0.998580272272916	0.99999999313501
ARV1	597.480349757048	0.239229798792131	0.147648855611312	6.65396518701471	0.826374090407715	0.924520352450031
ARVCF	360.560798995898	0.853136530899609	0.210466474401681	31.0181418114761	0.00109425951445805	0.00482033995557834
AS3MT	289.809554772332	0.51949360536888	0.229302773361687	12.3139071798649	0.340516303080259	0.521992010861545
ASAH1	2463.91438110795	0.612207572549411	0.190031636945524	17.9981877126676	0.0816226746965613	0.177202378241678
ASAP1	695.167712131902	1.03172798537902	0.209705987843961	55.4213953549113	6.48812340454929e-08	9.58103972111575e-07
ASAP2	1308.87972048126	0.211632461649195	0.115483374864214	11.6599354818438	0.389739787661883	0.573546073242324
ASAP3	2022.4731637264	0.537531185215383	0.177392681490935	16.91834831945	0.11031413482944	0.225290847626027
ASB1	1313.14480377381	0.639185926962097	0.288710613472862	3.72434296324514	0.977298154218647	0.99999999313501
ASB11	313.726626187294	0.70556233400128	0.264345584072868	19.2545966437748	0.0566737360939202	0.133106318750017
ASB12	42.5258921915156	0.744811007521147	0.417021018547723	5.73740724271602	0.890298028710847	0.962268800584426
ASB13	837.809870294981	1.2167690853592	0.237942515994171	56.2254455324061	4.61928212381482e-08	7.07248598121161e-07
ASB14	31.724680051454	1.51416430894131	0.517417094936442	24.1019411842898	0.0123102039262021	0.0378583323794612
ASB2	102.73202618775	1.56261981984809	0.365570333878859	47.1580120094938	2.0159526102431e-06	1.95756285030305e-05
ASB3	751.208129334792	0.39701457047809	0.140265068692238	19.1418217133474	0.0585947890332752	0.136425514702041
ASB6	588.614154274935	0.380225482535957	0.136065276448201	20.9553745348775	0.0338363467177303	0.0879213006495626
ASB7	609.955842389835	0.532822077974394	0.136535106117911	30.0000148800301	0.00158458673201282	0.0066378041711697
ASB8	1073.09777938053	0.263011699794247	0.127994455952394	9.25336407779315	0.598518230308734	0.76524803747006
ASB9	51.7480118717791	0.9135660840555	0.296036210620856	18.6839795244905	0.0670074664482843	0.151990706007709
ASCC1	862.84039627736	1.52636687070597	0.241398659676891	56.8540551167706	3.5397043408205e-08	5.58071226629047e-07
ASCC2	1524.95751370464	0.74761580551125	0.143019858880955	36.5339307721104	0.000137888266468537	0.000798645367969344
ASCC3	1945.35503075722	0.909348920126769	0.195344491115168	55.4560323054553	6.39397410553368e-08	9.45904436508062e-07
ASCL2	421.966619043708	0.873908436169702	0.231609414934473	22.2672745556419	0.0223824922172271	0.0622305554967446
ASCL3	0.429378732799055	-0.0739220946369468	5.01738037724266	2.57959697009095	0.995198176445512	NA
ASCL4	27.0902305112075	1.88238691003218	0.43686692608581	21.3685873541135	0.0297473785255392	0.0789592846675127
ASF1A	506.628707734247	0.465920145333033	0.159202952057304	11.1244930484015	0.432893388004206	0.617588368942813
ASF1B	211.084154778552	1.20915217061993	0.298495451842281	36.9610981239682	0.000116974110899546	0.000690568813511557
ASGR1	27.5088004093568	2.82589703014674	0.765475074614593	19.715661888952	0.049396001741567	0.119009929342441
ASGR2	11.6285196577347	2.4247713210348	1.10530064348384	2.26277092890194	0.997339208595515	0.99999999313501
ASH1L	3848.271854026	0.289665770544413	0.157162475192042	6.30425830682532	0.852311546842018	0.940586337896803
ASH2L	783.746335611982	0.214801015677613	0.124328642451991	3.41579030454983	0.984012575991378	0.99999999313501
ASIC1	14.4408792324804	2.22498369116778	0.796721055132274	15.1423325950203	0.176073175135976	0.321611676712428
ASIC4	264.166705624492	1.09652391204852	0.241949497461961	27.519391160813	0.00383320877346463	0.0142159623737417
ASIP	2531.22642674289	0.875476938757012	0.440992505689596	2.09182030703914	0.998146404159918	0.99999999313501
ASL	1521.36563727247	1.14769392442345	0.336290452347555	12.8827980561941	0.30105468141801	0.477784402637955
ASMT	6.05887874249219	3.03622752073123	1.12280995572846	14.9243325740752	0.18598729799756	0.335154622142524
ASMTL	667.599863630821	0.892777999522248	0.275483748795538	6.36241929963859	0.848121816101784	0.938429789820694
ASNA1	1783.85434143934	0.255396618432282	0.116930136393069	10.7151086018511	0.467430034467891	0.650296745459749
ASNS	1483.47926850808	1.39118627985717	0.180388947465022	64.5340915076689	1.31840361399066e-09	3.02557111825715e-08
ASNSD1	1087.33699984903	0.442974292281975	0.176744236554575	11.348632192436	0.414534995919719	0.599410172395443
ASPA	346.802043733114	1.1388321692136	0.3776700348493	16.7399422627971	0.115806844743385	0.233526032299286
ASPG	121.043471340392	0.880514003616457	0.294804228485241	9.72820880873132	0.554988039377603	0.728783498789059
ASPH	1772.47146463326	0.782417289074525	0.149803114956385	57.3588100453604	2.85744666973827e-08	4.61335680677536e-07
ASPHD1	0.390287188947957	-0.162099419432048	5.17183199938907	1.7707645955843	0.9991532772579	NA
ASPHD2	143.69330565376	0.824462705019793	0.325312140390122	10.4040457554564	0.494450424163988	0.675985995147251
ASPM	734.500953254487	1.0737786979586	0.319318416529152	36.4772977624064	0.000140922723526395	0.00081453010795563
ASPN	1793.76666411458	1.78475757043435	0.340841283981825	59.6931907183637	1.05717516682626e-08	1.92247494913197e-07
ASPRV1	16299.4444999257	0.48403668280153	0.27519235280754	10.0515494454447	0.525756291050491	0.703650847451102
ASPSCR1	991.933273993427	0.578412355978291	0.159440335738168	13.5906254452158	0.256478817280937	0.426236728617668
ASRGL1	667.215474534852	1.0292413492233	0.298202502305787	19.5287138780377	0.0522384824050764	0.124385864095945
ASS1	1453.34476404729	1.31700309681628	0.269062329088231	49.4794020677471	7.76295831499305e-07	8.43666920651537e-06
ASTE1	320.233891924606	0.631391036884044	0.207630799700446	8.22861747813488	0.692690032991784	0.836525084300495
ASTN2	105.232612269551	1.05710698488652	0.381104024605456	11.8338229696379	0.376263040562678	0.560210153276982
ASUN	584.756763805754	0.519724941262814	0.160588204923237	24.122977172398	0.0122245840314738	0.0376625601911569
ASXL1	2322.47582867594	0.208842163467488	0.115578369019856	7.24642379779453	0.778790882195502	0.894836763535423
ASXL2	1933.35541002972	0.267203304710863	0.166797939151269	6.50394889023698	0.837716165139471	0.931571444969104
ASZ1	0.373029042513458	0.160132861035732	4.07623359219504	2.10413264852134	0.998095311738058	NA
ATAD1	1707.83816978518	0.524342576668871	0.14448361703732	15.475765027088	0.161735388999758	0.301769270576546
ATAD2	751.254116846505	0.422143633142141	0.222891339325151	15.0061442746049	0.182215814583402	0.330108474019149
ATAD2B	1933.2513778664	0.785245393680985	0.189659141379613	34.7501776961449	0.000272436144157362	0.00144379691442048
ATAD5	331.22229010406	0.762625511416065	0.191654454620253	46.2217636204155	2.9542484854303e-06	2.74435927768258e-05
ATAT1	388.908723659821	0.526205257932975	0.145733431761105	43.5830197363421	8.59476652567851e-06	7.03109828363363e-05
ATE1	926.092285499841	0.583422999463287	0.159001565053018	15.401695210338	0.164835636818118	0.305910771506702
ATF1	1037.54882691355	0.465889473791213	0.188815502935447	13.7750386416592	0.245692424378472	0.412813263742647
ATF2	1370.30514698852	0.707301288170952	0.160396941470486	17.4887411489655	0.0942271077689628	0.199242522241246
ATF3	459.239271068673	1.47228575914389	0.251831513649342	67.6710597878618	3.37761343110863e-10	8.89614810763501e-09
ATF4	10773.9902777741	0.597476426882234	0.143750001364725	30.1751205165993	0.00148727766456456	0.00626927984588104
ATF5	922.88853585679	0.449352349442543	0.156890134983481	19.4072186967715	0.0541641481915744	0.128153290501648
ATF6	1738.48782153306	0.361533730006048	0.149286342011722	10.8007647586228	0.460102519331413	0.644049061601466
ATF6B	1378.23181148845	0.48243815316634	0.15678576444002	15.5990510251964	0.156680666211694	0.294960174110009
ATF7	2032.67498422502	0.632119088254717	0.124157914159173	38.9511469739296	5.39957492579248e-05	0.00035231876677394
ATF7IP	2287.99625618531	0.709682077281635	0.156658086151793	17.1893952803613	0.102396807306145	0.21283198580684
ATG10	291.794547811007	0.338381202352954	0.212580879456153	11.5070259138666	0.401814004545895	0.586023541884925
ATG101	777.896654424367	0.586733172935335	0.160807924017106	26.5475125435647	0.0053756252248724	0.0188502388889582
ATG12	1359.29240639203	0.282412376982195	0.14668910830199	7.13373825330939	0.788151960483996	0.901174365722366
ATG13	1748.77971353261	0.243117242486848	0.122869645521223	2.94360150773826	0.991450398884758	0.99999999313501
ATG14	987.762852460125	0.449466741621008	0.142421270075858	11.6937766533683	0.387095596628188	0.570750371783197
ATG16L1	1444.62701180474	0.501763777719723	0.169644172669804	17.5744770135996	0.0919940283062459	0.195176126812946
ATG16L2	303.478039303253	1.01922760426926	0.229127175352572	25.2141347158516	0.00848077014396245	0.0277086164473325
ATG2A	2067.54165142369	0.53506109270218	0.184182011388959	11.3600094049081	0.413614165078039	0.598487633348413
ATG2B	1720.1972041572	0.476689349655144	0.129019936926993	22.3379889815897	0.0218817190327248	0.0611504517046286
ATG3	1290.39100026199	0.201422299894405	0.131545844564177	5.61093205290769	0.898023022559188	0.967006915782812
ATG4A	370.706865247002	0.682245107992324	0.139223373530647	20.5662048690076	0.0381540984621348	0.0966030321580239
ATG4B	1742.78196966551	0.850260152239988	0.201691131833239	24.4863181970035	0.0108316643594733	0.0341171182083832
ATG4C	497.793615533507	0.384373161705459	0.19359163590393	9.59175600602407	0.567438913576764	0.739925360449017
ATG4D	982.524829093025	0.624400883881992	0.166350786879029	30.1379334609777	0.00150744657009968	0.00634898431039685
ATG5	1090.2665287389	0.364200411855228	0.151299867630549	6.27635382897591	0.854303373773058	0.941624109749259
ATG7	536.061980039896	0.498841547615808	0.15288231238421	15.1303709392276	0.17660595529626	0.322263484265924
ATG9A	918.793501853589	0.560517973889394	0.141390418863297	25.2442487805356	0.00839479659451487	0.0274692601505749
ATG9B	2884.08426943592	1.26261155709256	0.303937783954101	20.1868965975501	0.0428424638497738	0.105889245819602
ATIC	772.525448921474	0.31248268990152	0.150531382835357	6.52310786230078	0.836285201245156	0.930722999965995
ATL1	126.968776825013	0.967681696997089	0.330315356532935	17.2521090028044	0.100636293160947	0.21006119039676
ATL2	4445.03688655692	0.527857257468336	0.141569876101518	25.9158874363001	0.00667953206481662	0.0226651888807663
ATL3	1024.51401477391	0.578969552033537	0.256018048745025	5.95914560150823	0.876076212589531	0.954568595640259
ATM	1308.24752125895	0.608192970999647	0.252317291022507	11.2668520794381	0.421185728585291	0.606107490028158
ATMIN	1097.33521470382	0.221100408712842	0.135302155430891	5.51353786162093	0.903774782484976	0.969914726015328
ATN1	1979.55019923453	0.551053909496279	0.170102681500101	12.8066252046685	0.30615202468886	0.484196008277538
ATOH8	190.659487301336	1.83151971024635	0.25856324208189	94.4251539413253	2.25280950326321e-15	1.58974156183796e-13
ATOX1	1991.27139014676	0.578196117194555	0.172611701058949	18.9110729354726	0.0627085750641403	0.14392471568144
ATP10A	298.584621294518	0.509049009591745	0.182461204071803	7.63806786507553	0.74531132992029	0.871992069524166
ATP10B	708.574097076853	0.670085789037267	0.171763020327847	20.3618969982886	0.0406176663514543	0.101614770215477
ATP10D	1185.86572224227	0.649996025438549	0.146855510502741	27.7937476758808	0.00348125541955195	0.0130767739464117
ATP11A	1733.01023508393	0.525424959582677	0.148311334079358	16.2916545670494	0.13064402320873	0.256814285232459
ATP11B	3042.45888881116	0.589578128916549	0.139475227896643	38.2957362770638	6.97343609000744e-05	0.000439773908536963
ATP11C	748.368582836427	0.828901030700597	0.212908131606019	17.3916738724458	0.0968120332987519	0.20366106274134
ATP12A	427.115657209294	4.37718221122291	0.805913555717533	71.8344984656395	5.46552823268287e-11	1.70472025325584e-09
ATP13A1	1377.4539321004	0.511132499098894	0.139990051664732	20.1925581407924	0.0427687826692164	0.105761929553515
ATP13A3	2503.39876513228	0.525832098669951	0.151664112536436	13.9617069937491	0.235119636606305	0.399333056422658
ATP13A4	874.270379079248	0.828756615755551	0.249812944073758	43.3858047647039	9.30354119491652e-06	7.51933620282282e-05
ATP13A5	482.473952291038	2.48729027267741	0.343567975255435	127.267696694094	6.2118882812013e-22	1.14828749521032e-19
ATP1A1	9625.60162499984	0.415891213590073	0.118114030152136	42.4598091839896	1.34818131309594e-05	0.000103919300985348
ATP1B1	2260.54336150377	0.676518709011403	0.178042499026056	26.9077567668689	0.00474494534951568	0.0169905640389891
ATP1B2	342.532993692998	0.956272963701497	0.172370604376978	37.4706047976058	9.60694053740436e-05	0.000583000706529226
ATP1B3	2391.33912341826	0.561162847119226	0.155810574192179	18.4911869930538	0.0708610536225693	0.15871409825816
ATP23	429.887021969499	0.454224824289265	0.252132688728303	4.28908271572021	0.960685115421003	0.997518391683472
ATP2A1	8.73168352813488	1.56876542817327	0.838513360958997	6.26360393480255	0.85520946802713	0.942184677745018
ATP2A2	5405.75950774296	0.445603183781299	0.14312829973711	26.0174424471699	0.00645124493779216	0.0219979919193728
ATP2A3	301.110615511228	1.3211668759958	0.282322618274197	55.6203720312362	5.96542391088644e-08	8.89033479145347e-07
ATP2B1	3557.46371396081	0.45945190748829	0.140956697471503	16.7498805697861	0.115494846418247	0.233106847689197
ATP2B2	708.117481663966	1.72814356613722	0.346944325419613	62.5214261966819	3.14247657133264e-09	6.56823241035077e-08
ATP2B4	245.475945272761	0.79531259180701	0.311204473581435	10.3105558394141	0.502687772491057	0.683168482930143
ATP2C1	3579.99395787597	0.419137101152271	0.129124962256036	27.7075078797325	0.00358839648263447	0.0134241739191612
ATP2C2	700.732826397346	0.95158564941209	0.298337063455698	22.8003249888364	0.0188566164307828	0.0540457986435053
ATP4B	11.46427082899	2.90954921806471	0.792187037979753	23.7339639038943	0.0139026284101157	0.041865798809658
ATP5A1	13052.9379576093	0.470780045471619	0.0947744586783826	59.4101495544131	1.1930468740495e-08	2.13909728075315e-07
ATP5B	10953.5508590188	0.536512208769246	0.105832573613818	51.7598127503865	3.01359034458378e-07	3.67782143264801e-06
ATP5C1	4026.96294735466	0.34108516107757	0.139823037612479	5.50022801788646	0.904547325954091	0.970330834831975
ATP5D	3742.1072633499	0.916163946312257	0.166495375990471	33.8762390780385	0.000378934362754072	0.00192563643761205
ATP5E	5684.96444849487	0.454988485527809	0.145063012802269	24.2272085251918	0.0118085810434259	0.0366668360986266
ATP5F1	6476.12310911893	0.538597860006904	0.163799992397777	9.23179803601283	0.600505775389183	0.766816076324016
ATP5G1	1161.95731867657	0.555525759125987	0.15110124003872	27.2865657836552	0.00415846234978557	0.0151763915750461
ATP5G2	6163.75659352055	0.513288199272843	0.168396907043884	9.49426547894018	0.576367407770918	0.74762817512834
ATP5G3	3978.08809373567	0.488224726078062	0.138480191925107	32.8846254549536	0.000549292912644366	0.00265667376305121
ATP5H	3977.69488492338	0.436585952509693	0.140083403943316	16.3465564000626	0.128744906014366	0.25384882192812
ATP5I	5236.45832140339	0.746983228046702	0.21524901949603	17.545045440957	0.0927553574484702	0.196501702999603
ATP5J	2231.26836841884	0.424485624943906	0.166753443255486	9.75050578440101	0.552959256450503	0.726875482130967
ATP5J2	3257.10648073766	0.501142431332072	0.166372237358247	16.3726207783296	0.127851472545657	0.252383591684377
ATP5L	3819.92382371097	0.250688089507096	0.125267248671416	3.4835801724488	0.982671098468783	0.99999999313501
ATP5O	4636.37385673853	0.5322760498259	0.168953405474525	7.77816923175794	0.733026552819545	0.86416761203111
ATP5S	486.355327102256	0.310020597553959	0.185433364969077	5.08642051499339	0.926909110656596	0.981516274470241
ATP5SL	739.407552916068	0.188477979092057	0.149551906767476	7.12834334162079	0.788596760578007	0.901452954238687
ATP6	0	-9.96578428466209	NA	NA	NA	NA
ATP6AP1	2131.0463950647	0.392273649585023	0.109616421595661	20.3548048018753	0.0407057389935693	0.101749698976594
ATP6AP1L	3.16252996268013	2.00062505831849	1.38862457605348	13.4500854956269	0.264928061199991	0.435897517012061
ATP6AP2	3682.70210936006	0.357158353608011	0.123682303659794	8.75645748494219	0.644361004639816	0.801631877160265
ATP6V0A1	2547.30634022953	0.440930363979531	0.114185357519167	31.1019101680477	0.00106123146757361	0.00469847348717658
ATP6V0A2	1688.61625876971	0.462569909506289	0.130229957300674	32.7851179689595	0.000570035552398986	0.00274887698920242
ATP6V0A4	365.790210018028	2.02530362330445	0.446273555097324	41.7411879738003	1.79556807689741e-05	0.000134344230157467
ATP6V0B	2614.36213035816	0.461814861928225	0.133702124306868	18.6802673963628	0.0670798679766716	0.152137805027235
ATP6V0C	3403.09746549057	0.389242457202327	0.153665067802401	12.1402840025353	0.353191474683578	0.53579694499318
ATP6V0D1	3304.91846084617	0.516734749337503	0.124194052259022	30.7368813280918	0.00121261373025975	0.00527823591510126
ATP6V0D2	141.096846087457	1.69231960749317	0.453956569262175	24.6849653537491	0.0101350543255527	0.0322252184954334
ATP6V0E1	6117.13903279822	0.421193251746362	0.159898805463371	13.5648797603241	0.258011798200535	0.428015784780387
ATP6V0E2	205.206320393396	0.605180740023125	0.234286136510503	14.7678597514708	0.193372998524084	0.344955515472489
ATP6V1A	3715.29540807796	0.577530844346967	0.142807541171697	31.0720336488519	0.00107289856789926	0.00474075290451804
ATP6V1B1	4843.79041494051	1.00387156377557	0.195195920012376	42.9149676892349	1.12373385734415e-05	8.88274362166625e-05
ATP6V1B2	2498.973184572	0.439073471571353	0.10967304859456	29.2091638989916	0.00210631592585793	0.00847176788047146
ATP6V1C1	1428.97927910862	0.328509810006312	0.151129135108819	7.36818196912981	0.768531913715294	0.887884050730538
ATP6V1C2	3741.08474255084	0.704031750314843	0.240258044263772	18.6520464174278	0.0676325734243552	0.153081186466786
ATP6V1D	2518.68200077625	0.45149113459409	0.162572833991205	16.5987152514913	0.120318563667347	0.240680083785929
ATP6V1E1	5245.47625464129	0.699256988149299	0.150072025595868	57.7062783301087	2.46538270254471e-08	4.06173312130608e-07
ATP6V1E2	11.5868312354003	1.46331348912702	0.683724307353432	11.4836093354115	0.403681112196909	0.587827616510481
ATP6V1F	2935.49972594193	0.528202897536632	0.154118439015211	13.6835087229439	0.251003498253506	0.419463339662428
ATP6V1G1	3676.5300037678	0.533050496778579	0.132967104124835	12.639823863932	0.317516485481911	0.497019862179539
ATP6V1G2	9.87563804789213	3.41217734201357	1.00233833375588	9.97748938471329	0.532413134900037	0.709309194333566
ATP6V1H	1773.76729664588	0.460611074043799	0.0997993058922298	56.903370353475	3.46647493842329e-08	5.49103801370211e-07
ATP7A	1159.55421690032	0.87935077004987	0.343343600183332	9.64092124501633	0.562946116602507	0.735717813344456
ATP8	1.13661107890519	1.32263668598261	1.63812796948757	6.18867619977847	0.860483101744264	NA
ATP8A1	1051.00882977459	0.663041292077069	0.205918510203005	8.75099674711231	0.644864215933028	0.802059820174974
ATP8B1	1121.51166827248	0.412739139292498	0.17022841426512	9.49707558811218	0.576109711487473	0.747410635294643
ATP8B2	2230.87768940359	0.593652681679916	0.132041571887813	43.3951498468759	9.26869028516444e-06	7.50019439983045e-05
ATP8B3	243.361269110092	1.37623692845992	0.204462763865127	82.2395883727626	5.43543309863596e-13	2.6013905345467e-11
ATP8B4	124.250314282961	1.67565940432121	0.460647593799048	26.3297254005408	0.00579499738704169	0.0201033354538585
ATP9A	3470.04341967249	0.331306546582901	0.121902539163278	15.9878477248585	0.141582629165706	0.272938040093744
ATP9B	1226.0519621688	0.314377809226562	0.10302915013764	12.9119168218666	0.299121472085466	0.475540361452584
ATPAF1	985.043366875273	0.289997662857146	0.10474643485851	21.7864995961362	0.0260804185208292	0.0708404358015889
ATPAF2	313.640897599239	0.518970324117608	0.161563133883743	17.1384954253849	0.103845146937845	0.215043768309418
ATPIF1	2521.98722436024	0.447391891829512	0.147865181360386	24.9107435642631	0.00939489549577741	0.0302660636224915
ATR	612.646730884067	0.333674234416793	0.166726573113392	11.1993976299379	0.426712828360019	0.611553935459564
ATRAID	1257.89180249782	0.350191612899623	0.141057669752934	6.83842347679234	0.812013243027766	0.916853731228157
ATRIP	275.738286627854	0.622293303838946	0.182501885555515	29.414196276026	0.0019569949632065	0.00795543810079999
ATRN	1975.61773427782	0.246781483241416	0.109485740536624	6.17427574593455	0.861486512084511	0.946615680427049
ATRNL1	396.65911563526	1.23293573022002	0.37548571572148	23.9249279710226	0.0130534422968874	0.0397241819725093
ATRX	1523.62257284871	0.625934197325996	0.266758541032007	21.8692512125423	0.0254059635660831	0.0693449959215671
ATXN1	1285.83009945013	0.504773983307313	0.154858580505824	18.2380027724596	0.0762198812800361	0.168136017945199
ATXN10	3045.42296011518	0.232532564839312	0.0959834655734076	13.0792187157489	0.288179274200578	0.463261863400946
ATXN1L	1490.39299238837	0.34029168363553	0.143134449288885	4.571443086378	0.950135215117618	0.992908793600171
ATXN2	1048.67464906403	0.171050511691299	0.0914885105155465	11.858068331193	0.374405851441824	0.558200247121398
ATXN2L	2754.57246970081	0.368750437261045	0.155024550872229	9.11656225930039	0.611133922201004	0.776092779604373
ATXN3	2036.86102300666	0.586862143177625	0.145984223895872	26.0431367877434	0.00639467745389835	0.0218457707729057
ATXN7	1341.92038053964	0.299759070784636	0.162344256862703	10.7751614559793	0.462287386216288	0.645907256422715
ATXN7L1	411.443811119188	0.714460965814703	0.142386502003661	36.6704121785335	0.000130836160704564	0.00076279450290401
ATXN7L2	150.003981521892	0.891423236610247	0.223049036913849	34.0352929833724	0.000356915615217517	0.00182757121499816
ATXN7L3	1631.53590094087	0.598232617842932	0.124551938187969	34.1107168298435	0.000346915881734063	0.00178134359222071
ATXN7L3B	4447.59588260004	0.141488228309893	0.116608435316395	7.0228882831093	0.797226942553782	0.907224989580716
AUH	360.914110525046	0.554393419947307	0.195965098322522	9.04833270897586	0.617430880100164	0.781200301609934
AUNIP	2.72041100063612	2.77928749932056	1.11608697873996	18.307296613664	0.0747187152486169	0.165549526450889
AUP1	1889.71513514897	0.438941975324425	0.146675952580594	7.94354316296807	0.718352064586317	0.854734601945772
AURKA	174.759599220429	1.11674191437205	0.29207225494721	39.0269301296152	5.24183369552985e-05	0.000343137450068976
AURKAIP1	753.461785849393	0.467195753943387	0.183734701758325	8.97464283041364	0.624233014149065	0.78580975897098
AURKB	271.256328475394	1.52620396460509	0.328210643681585	32.8085158245751	0.000565090625182258	0.00272718826510115
AURKC	168.103534932387	0.783469711467298	0.437762307763017	5.41784863986391	0.909256000505444	0.972509722078794
AUTS2	585.429213692578	1.42342686504089	0.247842827204136	103.954308468263	2.9336420387246e-17	2.88341236284205e-15
AVEN	607.319582605344	0.552153208984928	0.127440842805065	34.7937849704261	0.000267969982305895	0.00142311641064134
AVIL	50.9481601137233	1.64776019313508	0.49682880304223	13.8908338854231	0.239093070392188	0.4044908711446
AVL9	1344.4372973988	0.559382264979106	0.155919690275111	29.8234438310839	0.0016889388337977	0.00700647077665016
AVPI1	804.936127451319	1.16038619267963	0.277338244191502	22.9388864108433	0.0180291663337803	0.0521115582354526
AVPR1A	114.281717779248	1.5807234364412	0.373859965313853	40.9296922361931	2.4781099270891e-05	0.000177565565152626
AVPR2	8.13939995283897	3.24317225593473	0.917082447694341	22.6069978443482	0.020070622636689	0.0568540665691897
AWAT1	438.832878466634	1.69504630456189	0.44699920276247	33.5059089041484	0.000435464986183199	0.00216753557475427
AXDND1	105.547329834003	4.18621249266102	0.658476183978943	44.9928365137424	4.86627049041855e-06	4.25566337289251e-05
AXIN1	1146.45461974459	0.445807948032591	0.156985146746431	23.7875287660788	0.0136593224848637	0.0412070365020057
AXIN2	1082.40646871806	0.34132534542642	0.1852372916822	16.3218847015867	0.129595435978782	0.255076530188187
AXL	2155.43626412973	0.759993148555324	0.245033358059722	20.0919800222866	0.0440950874977012	0.108416341426624
AZGP1	79.5899463072963	2.82210068393787	0.487904440590419	58.7372261049772	1.58977159790446e-08	2.76617512315863e-07
AZI2	1151.88315657439	0.263288335113852	0.126167335070171	8.75952179618849	0.644078609148924	0.801391231157263
AZIN1	2904.76740877787	0.48261883221011	0.164453293790587	14.3475494069227	0.214355128677305	0.373190526674021
AZIN2	34.872852243494	1.03355741583969	0.443894747511282	8.92298903510016	0.629000749942954	0.789788503184432
AZU1	0.99935091905145	1.20664688922628	2.81287456233998	9.92499827619302	0.537146008027358	NA
B2M	12699.990910777	1.20696400995119	0.27760891196346	46.6602598973656	2.47060862874101e-06	2.35034434657708e-05
B3GALNT1	110.364396610094	1.67383257692193	0.443429194325914	18.1454397559231	0.0782666724371743	0.17155264674596
B3GALNT2	910.442259353785	0.267992663004938	0.0873685220133456	20.4055010829773	0.0400799945900349	0.100531782770399
B3GALT2	69.5892805844817	1.59214256050864	0.375922261189471	40.0163543537937	3.55454480541036e-05	0.000244605612309472
B3GALT4	479.752565381459	0.956647923319149	0.209232167506595	18.602872568697	0.0686053311809518	0.154813396569044
B3GALT6	160.691312327385	0.703873139754864	0.20908456850359	29.443194413478	0.00193672001948942	0.00788342862074594
B3GAT1	118.306151737434	0.760205878192032	0.219231692849159	35.0696471939094	0.000241330916294922	0.00130119792144137
B3GAT2	10.6027880562582	1.48228692725758	0.823818037042502	4.20525683459513	0.963523371463959	0.9984074266715
B3GAT3	743.473267242655	0.482217511320749	0.194163074402804	4.03450202509697	0.96889685866918	0.999600335217796
B3GLCT	556.013497745422	0.891698973964794	0.242468791574676	33.8057546102941	0.000389110864383341	0.00197187998150401
B3GNT2	1359.25022645427	0.587739279321934	0.181360397719245	16.1687115217198	0.13498219786497	0.263210713711534
B3GNT3	63.1183948414155	1.09891396613096	0.416572950832734	15.1668300217345	0.174986070919434	0.320119333843805
B3GNT4	4.82215198392009	1.93715727493495	0.924169397204735	14.6630492736076	0.198448132833754	0.351883879358513
B3GNT5	364.953848073259	0.610135715378129	0.195189000244233	9.10574905957225	0.61213173863618	0.776791257854782
B3GNT6	20.3856664961662	1.28821505949461	0.686793779635157	6.46722567790863	0.840444274218296	0.933368885036898
B3GNT8	413.675483657746	0.975406579547395	0.217200100494496	31.298279091648	0.000987555942336146	0.00442678808712464
B3GNT9	180.278667497195	1.71836144383595	0.377137362372411	33.3231554430853	0.000466315176994587	0.00230006964535225
B3GNTL1	91.6663106965569	0.913407707276447	0.403160714972581	5.42428399885961	0.908892702803814	0.972509722078794
B4GALNT1	51.6792765237868	2.09546161293665	0.602691513022209	11.574588824141	0.396453653872538	0.58074479621067
B4GALNT3	1831.94552218483	1.28196262882234	0.267252351901058	37.6656119651547	8.90790057021494e-05	0.000545879831475854
B4GALNT4	56.6080670367515	1.98803198590151	0.465115751969505	18.2869019139476	0.0751578031123952	0.166302940359285
B4GALT1	1169.29650717136	0.802377698825747	0.212433303437805	15.6633894230013	0.154094585273004	0.290961652953403
B4GALT2	1543.86195232148	0.648826603008546	0.143863127412003	28.0531624390167	0.00317719093718325	0.012126903026803
B4GALT3	607.532934451037	0.399422886846804	0.155561742865899	13.8269100411124	0.242719684477415	0.409212607626998
B4GALT4	409.222655138553	0.459566724576516	0.125751447722759	20.2719383224448	0.0417477969966019	0.1037471118108
B4GALT5	518.061649000536	0.669956754214332	0.245577940640484	13.2340454968497	0.27830400790431	0.452002857912619
B4GALT6	171.697829056834	0.739095938195784	0.438668067524351	13.8199006875452	0.243119822288315	0.40954947740885
B4GALT7	451.033019728652	0.369258486130679	0.164668872349783	13.4630490942718	0.264140377832197	0.434990729009834
B4GAT1	303.312628963286	0.40811290702746	0.148049104743264	11.2991174090101	0.418555140267954	0.60372736210602
B9D1	372.109284323006	0.597975063781926	0.222125793849507	15.7107340359179	0.152214034861001	0.288275269143182
B9D2	113.944014922254	0.926890901919301	0.236750392780191	31.9185287874526	0.000786027073469857	0.00363415775661866
BAALC	40.0344304231212	1.14158249388868	0.431036869349827	13.7850032953192	0.245119270287364	0.412056413901227
BAAT	56.8807829684403	1.19811916006631	0.347876440939057	15.7071323341805	0.152356429823642	0.288436503290102
BABAM1	954.784816696112	0.401397266995078	0.129114832499346	19.6997821855592	0.0496318905783114	0.119492527573473
BAC5	0.133259894912123	-9.96578428466209	7.2599705518247	0.542332147015053	0.99999789036097	NA
BACE1	683.685615158794	0.520525901639755	0.132089132381686	26.4223741442447	0.00561290529048368	0.0195665101553556
BACE2	483.886303395516	0.738497564260636	0.249450565447904	20.5790727083424	0.0380036120305381	0.096391588469702
BACH1	1874.87295975727	0.295636986843021	0.147809302040515	7.84245242077918	0.727343383809948	0.860453372498041
BACH2	628.769386182517	0.614564701308884	0.190759615252515	18.6293041683261	0.0680809246395515	0.153871290023816
BAD	93.4109824812752	0.828120325930954	0.291775990723478	16.4572354449382	0.124986981735409	0.247876891201451
BAG1	5432.36201321363	0.297040005969093	0.120025200943877	4.98113829303554	0.932076620446585	0.983808552449782
BAG2	705.193793525826	0.696650116093806	0.13484556130778	38.3202343195006	6.90722362046129e-05	0.000436007671455748
BAG3	1821.37091261359	0.663734523737989	0.114432110283079	81.577194334592	7.30593208869628e-13	3.45556867735073e-11
BAG4	1371.65206251316	0.255245514854492	0.120790629101996	9.11915730530961	0.610894467532266	0.775934570931044
BAG5	1463.84444631514	0.361144794129949	0.103687107484013	27.3235329743217	0.00410510742089326	0.0150197583845249
BAG6	5074.07973698868	0.323825641879891	0.125909835459995	6.35285483494658	0.84881432643669	0.938835146477074
BAHCC1	611.561265979782	0.724886504427945	0.233312774834375	12.6870248142314	0.314272482272282	0.493399198279226
BAHD1	1597.06054851412	0.703839269550519	0.147852743929009	42.7130950104719	1.21832658631103e-05	9.52213436290958e-05
BAIAP2	2592.43105762215	0.545986237520747	0.160234954466779	21.1946741570556	0.0314093577552344	0.0826089478410412
BAIAP2L1	1472.28221112075	0.40968338454985	0.153537294472734	19.2979118260979	0.0559510713173338	0.131716104214623
BAIAP3	91.4701208028876	1.22957298140008	0.464179906977163	18.5802174587909	0.0690576679525794	0.155572780811328
BAK1	439.224189739698	0.571450287594089	0.193123241973835	22.4549257690337	0.0210764752540928	0.0592204573831706
BAMBI	3283.55667552216	1.92777280924803	0.298101801927292	64.0883392406097	1.5986369768953e-09	3.59497058565441e-08
BANF1	4218.66367293826	0.617169879603402	0.143553786904592	24.6931973206218	0.010107123210153	0.0321465549426003
BANK1	137.806566627106	1.74152247736935	0.335086275516746	46.8922074546894	2.24734996271764e-06	2.1542271360037e-05
BANP	423.018391418841	1.42185413210304	0.211902354448668	78.8301278934692	2.48325638925051e-12	1.04676010433072e-10
BAP1	1672.46687510575	0.552698283028159	0.130473229745802	18.4568760305025	0.0715671351786179	0.159863024799186
BARD1	224.51405571288	0.518061765866544	0.239842908708654	11.6136203040556	0.39337520221459	0.577494859702861
BARX2	3059.95975709857	0.906893220886221	0.182113362036223	49.6608686766535	7.20210923020412e-07	7.91681936057735e-06
BASP1	226.705365415493	1.50421549744313	0.299946288381901	31.7726030598692	0.000829498268965199	0.00380458926050075
BATF	28.8349187506577	1.92781149462634	0.589842195714003	17.1123685614434	0.104595408416827	0.216197464525097
BATF3	138.253539085369	1.6053124798938	0.396148439199487	31.2360930306223	0.0010103329287105	0.00451079064493416
BAX	483.684226946089	0.574933793191288	0.153493465671931	18.6633435455711	0.0674108352847714	0.152678167621771
BAZ1A	3250.60482603611	0.792899917243955	0.146193530545572	92.2070577475909	6.15135193827446e-15	4.06372426899319e-13
BAZ1B	2991.97754126388	0.258633917336147	0.115919081166128	5.97850584397185	0.874794547260544	0.953749003449635
BAZ2A	3234.78377273698	0.335957585806092	0.18464138485242	4.70303860296542	0.944691097512859	0.989854013468909
BAZ2B	2428.1597578307	0.36352985908526	0.150769030211825	20.8122448405964	0.0353692554628394	0.0911673440348921
BBC3	90.6993971061731	1.52287767534819	0.343332898253275	20.0062784628425	0.0452546450432737	0.110767230682328
BBIP1	715.926395263564	0.278641054028888	0.204050766610949	5.53134765658473	0.902735953175486	0.969471629918605
BBOF1	8.22077914799331	1.90570446108251	0.766231481010754	14.215244987451	0.221311112964703	0.381813307228856
BBOX1	343.501029632298	0.900138753757756	0.352154535741025	16.1314861630563	0.136319276257345	0.26526540415467
BBS1	791.56644604134	0.374045493301862	0.168862036532684	4.31676878146868	0.959718376633899	0.99733532272074
BBS10	187.069134984219	0.944216222560195	0.208594038517265	29.8637266754603	0.00166456189866034	0.00692387648557127
BBS12	298.340157384534	1.33342365479961	0.241558835432627	39.4730904776614	4.40094019178895e-05	0.000294501972515296
BBS2	689.088934537738	0.506215575381925	0.115308203961432	31.2815724649088	0.000993625639042602	0.00445099221900164
BBS4	802.307443591296	0.484991185879737	0.276168813819589	3.13814721137356	0.988771232908773	0.99999999313501
BBS5	211.575199389008	0.710139050551404	0.259357112297598	14.3011712610792	0.216774125917836	0.375884841920695
BBS7	504.388987738594	0.641716187688889	0.186594127952483	17.4340272790744	0.0956766827149345	0.201757140766427
BBS9	190.990911833914	1.23911189570276	0.196182298096069	60.215250948444	8.45642132642839e-09	1.58353562552236e-07
BBX	1806.26531884428	0.421006172560158	0.146758694507057	14.6867804004252	0.197289969875746	0.350422743567208
BCAM	5254.93056370986	1.02808793077057	0.189649540605491	37.0458843882345	0.000113209604152714	0.00067149258583251
BCAP29	801.996196830757	0.717585531959445	0.230212052094826	14.7847284864675	0.192565811380908	0.343744028649732
BCAP31	4113.55139877031	0.352120846219884	0.13751503926193	19.3242119647751	0.0555163399994615	0.13079966494962
BCAR1	832.655946725947	0.615784067388766	0.188660323464887	22.3136619950392	0.0220528032268575	0.0614835937758339
BCAR3	219.979353499204	0.8835050071323	0.266933567832405	16.6140138319312	0.11982272675435	0.240023246174982
BCAS1	357.321624469126	0.813717065236137	0.196308972768592	42.0501370410759	1.58766536564851e-05	0.000120082092539233
BCAS2	1053.8455188458	0.555111489568115	0.148416004563713	22.4491567278186	0.021115544441474	0.0593054230486842
BCAS3	513.967213132481	0.390296435212552	0.173252697967657	15.763014207092	0.150159417525907	0.285349627815665
BCAS4	169.866765930685	0.848211469021251	0.285994659916664	20.72934437686	0.0362860292001341	0.0929359606398248
BCAT1	13.4915997652224	2.93085202889957	0.89177619551078	18.5349773351207	0.0699688828425625	0.157098620503097
BCAT2	681.111131010363	1.04514995855921	0.229043739313741	35.5478475070337	0.000201159173510443	0.00111075806715865
BCCIP	1044.9392769671	0.437700762230672	0.142377278656477	25.432704147038	0.00787530197958642	0.0259959796177403
BCDIN3D	258.98747952474	0.60917616511051	0.180687792715487	10.453169172893	0.490142774915872	0.671691952103646
BCHE	119.549718712446	2.11665081966298	0.381798939970008	48.6721763783084	1.08294775362137e-06	1.13342216094645e-05
BCKDHA	1155.69035318965	0.419168473723826	0.143157836824186	18.5444509769544	0.0697771876679995	0.156808002935816
BCKDHB	879.756287202609	0.778312135540154	0.172160388801946	27.7239812744044	0.0035676886854708	0.0133591078467852
BCKDK	512.892174976938	0.419568685727504	0.119307668711262	18.5167934471942	0.0703381373454066	0.157857332298129
BCL10	477.796084549169	0.649413059779374	0.182692071184308	14.668183183258	0.198197129315847	0.351569148568096
BCL11A	576.778484420999	0.678210340944228	0.147390316966794	36.4239212674396	0.000143842554653108	0.000828081038201565
BCL11B	1517.87083016115	0.829125902628884	0.159298009324666	70.9918889078577	7.91103526793683e-11	2.38265246059281e-09
BCL2	150.877661750525	0.598281136958203	0.348454583035678	6.69310056808081	0.823364497644324	0.923222774704419
BCL2A1	60.860352795569	1.56752504192705	0.496329547433866	26.2571577648648	0.00594155084817972	0.0205451017744934
BCL2L1	1885.00212402045	0.609643686839471	0.163468348276681	17.9286806110367	0.0832502970378524	0.179998952142471
BCL2L11	381.76584386597	0.53800606791923	0.165509895645891	20.8788751599444	0.034647880582689	0.0896174770039281
BCL2L12	280.589014836757	0.495345282515676	0.162930494954634	18.6272385295633	0.0681217783407983	0.153935863770198
BCL2L13	3730.19091209824	0.428853406676669	0.159548019116507	15.7293367028816	0.151480311803424	0.287236665022321
BCL2L15	54.5849617807409	1.10917193546927	0.4537193284876	11.3475013922978	0.414626578144689	0.599476960608305
BCL3	328.184288044437	1.48495183317008	0.24858685389099	45.0049919046905	4.84237770953124e-06	4.23844780492376e-05
BCL6	3784.80459350599	1.38348626528113	0.200807377237742	56.825712243529	3.58248427194356e-08	5.64374320526903e-07
BCL6B	253.978131298234	1.38211561231969	0.258822762495579	43.470516603923	8.99229170316254e-06	7.31402226765385e-05
BCL7A	524.365385681814	0.571688238360763	0.141779349494033	39.9521201632108	3.64559657285195e-05	0.000250187756629407
BCL7B	407.529923381992	0.554505767411344	0.128173697618178	23.4700504335286	0.0151621618755866	0.0450926051116154
BCL7C	1171.35466169888	0.580547233875867	0.176863267094862	9.73731039538433	0.554159686498232	0.727932950208806
BCL9	565.015516741768	0.48752014853395	0.127923850815525	26.377618553311	0.00570017434840897	0.0198158752494984
BCL9L	1949.07548310182	0.69036151467151	0.252178257122791	7.24688947530785	0.778751924648159	0.894836763535423
BCLAF1	4128.19178929137	0.474084498072899	0.139383087094637	12.4361929682519	0.331764355911572	0.513577136390771
BCNT	1024.32637622794	0.212716258253502	0.14577522506163	6.24010266368356	0.856873017616362	0.94350152641959
BCO1	46.0850235318376	0.825919249103947	0.483871208495526	7.19848932372662	0.782789123255791	0.897690270033063
BCO2	967.808562198667	2.23333265632534	0.622605853769027	16.0718959344085	0.138482688260688	0.268503433965032
BCORL1	426.452901392547	0.414971944588873	0.21016406532422	8.64974734475652	0.654186410806855	0.809010126517359
BCR	766.346857068203	1.09966978918438	0.264844582683459	24.0682868240922	0.0124483614597606	0.0382117664614131
BDH1	1147.87038635204	0.918375467208596	0.164555558191485	70.4933888260356	9.84296914430414e-11	2.9043898285139e-09
BDH2	800.783019304088	0.625498525548966	0.169901292072683	17.647913840596	0.0901180671351796	0.191991433872821
BDKRB1	12.8159920689443	1.93401847994707	0.872633902427126	5.41982964462557	0.909144248333857	0.972509722078794
BDKRB2	74.3359053940207	0.4943889719731	0.316371258561987	15.2528604702146	0.171211052555997	0.314641690801786
BDNF	92.7627618849612	0.787960824128858	0.254045835892813	15.3579727482536	0.166688219481585	0.30855314049926
BDP1	3160.81081476691	0.467236478234706	0.158051941223664	27.4280358172703	0.00395780802737552	0.0145895684398189
BEAN1	87.2436444048908	1.02643199831306	0.333435616889564	22.1571372903131	0.0231837519861576	0.0641573161336479
BECN1	2078.82504434339	0.309836333030058	0.0849507373500287	17.9463525021847	0.0828338020837487	0.179329351905603
BEND2	2.90110603447857	1.48591900755483	1.28252483424859	5.01253142438878	0.93055820321532	0.98307303215363
BEND3	317.458523935849	1.1626747399061	0.25610359211302	30.2086620623838	0.00146931030409095	0.00620346062168521
BEND5	121.558302493656	0.901891065572065	0.227877587373071	16.9212658649566	0.110226194961932	0.225173808422578
BEND6	14.9508450911917	2.06846034373339	0.620627048078063	18.1827204818935	0.0774365458319695	0.17007509940793
BEND7	503.39229888873	0.712248222170796	0.189930190405048	26.6144953290059	0.0052525900288638	0.0184655224385235
BEST1	10.3302221815143	1.89819151568046	0.76782007843047	21.6455996067369	0.0272671433823032	0.0734401379508124
BEST3	1.16576417967057	0.910893267810398	2.35879212536582	6.06161315749533	0.869221742164374	NA
BEST4	21.641989058494	1.29633342126975	0.546604989375181	12.2845989036273	0.342635512140254	0.52424352146055
BET1	918.643564835175	0.409732014068311	0.139887125429519	10.2124915452388	0.511380862212173	0.690742977322054
BET1L	1311.73308545256	0.492911425365215	0.139240570012591	21.8546209708834	0.0255240145859604	0.069620058195819
BEX2	1215.84202443538	0.918952466248194	0.187405334349533	23.6825255081725	0.0141401140071167	0.0425047228299856
BEX3	666.951411059426	0.607651583333401	0.160484161270771	18.3619322972332	0.0735535983760485	0.163471371462497
BEX4	86.875586053549	1.33876545224194	0.421759193126435	19.9978037758434	0.0453708028455431	0.110970661147712
BEX5	1379.93148212959	0.541578858606172	0.129513297025479	51.0414436551595	4.06373882358708e-07	4.7687986928629e-06
BFAR	1164.69401517088	0.475331033921917	0.106723229503924	46.1977755950093	2.98325212921425e-06	2.76365734030059e-05
BFSP1	21.1044433160509	1.44747737984109	0.627466973239026	6.04435483625542	0.87038841894484	0.951054848495489
BFSP2	16.3931718648412	1.35646575792472	0.664514204107649	13.0132296217114	0.292461607011127	0.467868909858452
BGLAP	75.4500802021635	1.27821539221054	0.355832029180041	38.7457011271626	5.85105468820412e-05	0.000377378043894445
BGN	3353.07691638277	1.44465556967943	0.240110552175153	30.8307754109214	0.00117178516400468	0.00511931900900482
BHLHA15	136.172499327187	3.58469241678836	0.564983743038786	99.6708449996361	2.07495810518394e-16	1.77153944327759e-14
BHLHB9	116.637118146371	0.838494887252362	0.322705574497694	6.98724154099062	0.800115763862393	0.909293888911834
BHLHE22	601.654658285691	1.85392861495656	0.368441291713165	53.974095678692	1.19327869199253e-07	1.62345525759335e-06
BHLHE23	215.829488146086	2.45039831342468	0.371157696913997	45.1363523018878	4.59145320444572e-06	4.05018406086525e-05
BHLHE40	1652.47878340768	0.503193666310762	0.142232888029773	54.2053195577002	1.08280405252082e-07	1.48620019443066e-06
BHLHE41	662.552188041111	0.838970713145501	0.195169626972188	23.1642141481947	0.0167558375579175	0.0490289530866221
BHMG1	2.56389708911372	2.55693010225579	1.98517208703777	6.18225244478421	0.860931110026668	0.946108586633616
BICC1	784.425679957055	0.86804168535061	0.23087974792013	29.8449331276108	0.00167589204148453	0.00696094593771837
BICD1	76.2227434909976	1.08406599552636	0.374542181520057	21.4449870352792	0.0290432781565831	0.0774474605051606
BICD2	6713.55526719782	0.281309228945565	0.0890143519173793	23.8199583682172	0.0135139748361171	0.0408357946870011
BICDL1	221.345411408272	0.911908832631592	0.205175535014399	20.7389255954944	0.0361789696128384	0.0927206892303589
BICDL2	2161.44440210926	1.24968247008691	0.211764433690413	51.6472522334753	3.15828903247774e-07	3.82660046394432e-06
BID	787.571903597717	0.298143504071961	0.159085669758504	9.64942200784054	0.562170033000657	0.735140252290767
BIK	13.5640794623426	2.13453243009207	0.725217015689581	22.7499993496175	0.0191658483919885	0.0547684979790352
BIN1	727.039657521339	0.967387670971314	0.228246476128123	40.3880186840378	3.07000641614094e-05	0.000214932450586601
BIN2	144.164160545953	1.32051525144154	0.39014089285049	24.4710440568738	0.0108870635497277	0.0342755380411663
BIN3	566.79379898504	0.493582849146772	0.148933523397482	10.7217281838753	0.466861938124951	0.649730708059099
BIRC2	1857.04616624343	0.374005554471707	0.133848564685724	13.1433690020554	0.284058294919391	0.458649778374134
BIRC3	2520.23609353513	0.736287024428241	0.202784038077447	9.34616380879186	0.589973025283283	0.759042620933074
BIRC5	543.582002589996	0.878691122204678	0.233761456270952	46.1818827758624	3.0026227957547e-06	2.78032383785209e-05
BIRC6	3157.96187883874	0.445844604153725	0.184064152623862	8.69852043972821	0.649697827211301	0.80548705975186
BIVM	811.170735595767	0.5109387084268	0.136827632721911	26.1394463984515	0.00618683086499326	0.0212184604423403
BLCAP	1471.33553128805	0.387333522594513	0.113418372934403	27.3669651677836	0.00404326069087174	0.0148257797380118
BLK	53.6871706289679	1.94796196208428	0.419542129385027	53.629992325027	1.37870198187248e-07	1.85196441551657e-06
BLM	243.669578091169	0.964164632595322	0.239522455346985	40.1833851904814	3.3281238277333e-05	0.000230755549016185
BLMH	4667.74298520629	0.828682744492074	0.152533465044179	70.6025788524249	9.38315453069551e-11	2.78031147998506e-09
BLNK	231.62788588603	1.35244218224579	0.256741195064182	52.1818483764597	2.52721818827138e-07	3.15495162797275e-06
BLOC1S1	1693.15635477863	0.430455305138772	0.196122747493107	9.02949335137959	0.619169849350169	0.782565129504238
BLOC1S2	1043.73133041288	0.500359073704003	0.229203916442824	8.8976603764084	0.631338285649908	0.791588993003111
BLOC1S3	380.138346221722	0.706611917924375	0.186385273563044	16.6498046245955	0.118669494729631	0.238107115047534
BLOC1S4	415.643777239103	0.293527933650496	0.141385290143926	11.5149481014059	0.401183409116226	0.585332694444811
BLOC1S5	564.828325016682	0.280347060826619	0.131426084547201	7.69721850747578	0.740142356262565	0.86931672027598
BLOC1S6	1829.74070769639	0.433079861845565	0.165304730409458	10.1480858054184	0.517118044446051	0.695508409154495
BLVRA	1724.84298027662	0.506681129968908	0.14284599711116	17.4750380876092	0.0945883508969763	0.19981764334485
BLVRB	741.167687387811	0.918017308678162	0.169377302537879	50.4251286950326	5.24856989424327e-07	5.97477032763321e-06
BLZF1	1787.14351274318	0.512800775799708	0.133354351901212	23.6193561188793	0.0144369883283584	0.0432551491194191
BMF	1168.91721304642	0.507021166627547	0.16538274996548	13.6965221738023	0.250243278082123	0.4185400356999
BMI1	1325.56220568647	0.668421374758812	0.191225649876611	11.746401360397	0.38300420469612	0.567062364642672
BMP1	1468.25397739299	0.903026304629148	0.142588197768883	92.9536559161641	4.38783794592071e-15	2.97678608661133e-13
BMP2	691.502764001121	1.16933387770661	0.154428095888208	176.772418692061	4.74956179634613e-32	2.58645731444806e-29
BMP2K	2354.22313133753	1.10697642808893	0.182446874617622	75.972685426813	8.81728037031062e-12	3.28474160719323e-10
BMP3	255.817096039411	1.97001081773155	0.503842738338167	17.7902380381045	0.0865771945830932	0.18585594434847
BMP4	1546.99743782259	0.726543906966334	0.213771870223359	21.9908715456887	0.0244440585417746	0.0671104149827246
BMP6	87.1237575335108	1.27249434512903	0.263857309289647	40.8757272976227	2.53163676724798e-05	0.000180950511611492
BMP7	1023.37349508532	0.534962471265885	0.140987004095566	33.4120297628354	0.000451055185575715	0.00223684738719298
BMP8A	445.83722079641	1.85951255812167	0.33553497386696	68.8595723149179	2.01133790050543e-10	5.53430164474379e-09
BMP8B	234.968840353858	2.52755285906653	0.496217687169089	37.6501938130534	8.96130214569631e-05	0.00054784481243359
BMPER	87.2409312806003	1.95731548505959	0.412336738666953	42.49762110387	1.32796293465175e-05	0.000102584155912678
BMPR1A	3509.38614430533	0.519913376573106	0.176259466882951	21.8151782644157	0.0258448182508355	0.0703617407020786
BMPR1B	236.617509164026	0.67791064242042	0.282498054823314	9.86020539234681	0.543003995221805	0.718195319661556
BMPR2	5153.63171676496	0.494499724205179	0.166834281311053	17.1976556764071	0.102163410572804	0.212456451608156
BMS1	2161.11211242054	0.335014421981218	0.112967245714159	22.8433463604651	0.0185959745358016	0.0534508260944175
BMT2	704.690945855232	0.51026001169338	0.175246789309063	14.963342036509	0.18418130814721	0.332801468734475
BMX	73.6345601941089	0.978756732760207	0.39041484232814	16.997992490244	0.107934982013834	0.221577376729164
BNC1	1806.941263556	1.0151606245434	0.18609005543847	65.5498008001215	8.49181147214802e-10	2.04422352870144e-08
BNC2	2693.753651176	1.07724659401127	0.21333555239481	62.8672018572727	2.70766985408148e-09	5.73678652890512e-08
BNIP1	470.502229729688	0.245557884134037	0.108055041586337	9.52936178911739	0.573150345008512	0.745010405881975
BNIP2	1101.61804211219	0.374306053617098	0.163810929307359	9.73960258167546	0.553951115085446	0.727736966247414
BNIP3	1270.01938295199	0.465224000365195	0.13986478462476	18.2106611834831	0.0768194950041647	0.169033089968212
BNIP3L	7932.971676896	0.348969894854696	0.192802616921627	3.22383628181922	0.98742461740573	0.99999999313501
BNIPL	1886.50351877441	0.622439140669904	0.156678403291876	31.3252031364919	0.000977849849202108	0.00439120167520023
BOC	2658.39682268366	0.656225115547886	0.129686659914917	39.3254141051312	4.66342479890508e-05	0.000310007740920945
BOD1	949.56152917894	0.311477730020846	0.12130260865113	11.6355024230759	0.391655233242325	0.575640914333621
BOD1L1	1917.8625531814	0.550605927403155	0.188439150954211	6.95373544316277	0.802817623476653	0.910655423939147
BOK	759.448602971009	1.0050531540026	0.221732300475249	34.8584689408822	0.000261476749427539	0.00139304469175449
BOLA1	567.863326929556	0.652329492075423	0.168984061824182	28.704500601387	0.00252221297190214	0.00994327316980166
BOLA2B	1617.06898537902	0.51949623339665	0.199793600194551	13.9475465670916	0.23590954720027	0.400315097400895
BOLA3	331.484755442305	0.699926337959872	0.206664574429926	20.793010603835	0.0355800466048583	0.0915701058936376
BOP1	644.54061421955	0.609111442076708	0.177240663425241	15.7401132343767	0.151056599176404	0.28662203755583
BORA	272.067108600075	0.357970667783989	0.204886991198491	6.90274505574484	0.806903809949176	0.913570056274998
BORCS5	270.67653469344	0.300376075911591	0.169566443475864	7.66986253591904	0.742536201556543	0.870712268752335
BORCS6	398.885112686531	0.466671828666985	0.168650877650329	10.2663533402177	0.506599691392429	0.686528694995557
BORCS7	642.615177023489	0.534106216821638	0.178389419361978	18.0977874995225	0.0793391575327545	0.173440890216716
BORCS8	472.133960394605	0.440503084922239	0.177084645887782	11.2494170178696	0.422610770713149	0.607143274089073
BPGM	968.840903099632	0.777677063146167	0.139972229732442	58.4017733047345	1.83399548104165e-08	3.13694184613822e-07
BPHL	771.448448930566	0.835054315630099	0.340337214075687	14.0978087436358	0.227628501115306	0.389742239035716
BPI	39.5298194576855	2.52560281634515	0.998586041009635	12.4339697040151	0.33192216956411	0.513663578690266
BPIFA2	4.26649558770378	3.05803144570486	1.16636126310779	11.704083232718	0.386292329411001	0.570087463949481
BPIFB1	2.12694425006342	1.72389793384563	1.65572045279773	4.46596813658968	0.954255919679664	0.994841544245126
BPIFB2	34.7972538163368	6.01517588021998	2.17337353826839	72.1064558914427	4.8500137196042e-11	1.54624883601749e-09
BPIFB6	25.0405065491821	1.57207476016248	1.06281944396833	6.23438440129797	0.857276485740493	0.943785200100292
BPIFC	804.696817275577	0.590891750691411	0.260794323997739	4.14746657198009	0.965402876691884	0.999088085891432
BPNT1	1038.05576541407	0.282005427611314	0.13267871699284	7.63508960137574	0.745570881779293	0.87208334476785
BPTF	2553.94978108409	0.470238205801562	0.160125860384023	16.2807765792695	0.13102308579659	0.257359066870228
BRAF	6398.80450214526	0.989719291840634	0.257631273571802	35.8312295159933	0.000180524484747288	0.00100870433809571
BRAP	1289.45295085136	0.446171717517739	0.11069258292359	54.4927584360171	9.59521609684428e-08	1.34259728566191e-06
BRAT1	781.887578244244	0.642406483899683	0.184513818771707	11.8812013838282	0.372638915963921	0.556541510470465
BRCA1	289.841172966638	1.163740778711	0.307296894619465	29.7362893201951	0.00174286762211716	0.00720497327001205
BRCA2	810.682478147158	0.577250262195773	0.180898318646695	13.5853420020509	0.256792867936721	0.426485286519699
BRCC3	949.595256058008	0.354616666305803	0.148699244169682	9.86166436004561	0.54287190199824	0.718117736455479
BRD1	1398.48775161468	0.473450346919569	0.132335371016515	26.196600276137	0.00606655319825284	0.0208984408260551
BRD2	5982.76142301454	0.220978771474678	0.0932409263138594	12.3913443978734	0.334957196865033	0.51693110904056
BRD3	1469.94306009366	0.292791072896528	0.107734933694998	11.1725865753211	0.428919917004752	0.613451689929639
BRD4	1970.00033527386	0.416013695730773	0.141178383087557	10.8754808604248	0.45375339021735	0.637742540421972
BRD7	2252.41969929011	0.200173849414651	0.0893681079456981	5.6152073378849	0.897766584390033	0.96687242927442
BRD8	2375.41162857543	0.283294319299784	0.0966045623547602	6.5179709442703	0.836669385511803	0.930958077213569
BRD9	1089.93736793426	0.354269193805533	0.154140333050352	6.34398364262131	0.849455408504373	0.939025134608155
BRE	717.952794189908	0.368139403776074	0.164207566575198	9.05059734413214	0.61722184789051	0.780984866437195
BRF1	1110.84583245797	0.664018280350964	0.191187466366154	18.1170730743002	0.078903557054098	0.172713500389247
BRF2	204.049138660108	0.519807188917594	0.2005804300952	8.19661477117307	0.695590605332265	0.838596009503968
BRI3	1035.94283236483	0.304911173434391	0.141487187234383	7.07459841750995	0.793010580091116	0.904182964593987
BRI3BP	1269.87562337069	0.86032544021087	0.141407841800462	61.4198304297391	5.04602447916535e-09	1.00268587012527e-07
BRICD5	7.1698400530925	1.45748591061932	0.891471158874374	8.95726866699786	0.625836754144472	0.787189260207064
BRIP1	273.446594285954	0.782692097738683	0.237610651283585	29.712708110526	0.00175774300149403	0.00725456037220467
BRIX1	1002.24037115564	0.574809457873102	0.219011601748936	7.51606739523646	0.755885272081196	0.880009958234473
BRK1	2027.89252682471	0.525407776961122	0.139660859878546	36.7770339302165	0.000125574077378078	0.000735093574982829
BRMS1	889.950288282483	0.42979796343699	0.149758843891128	13.1690199442795	0.282422094436589	0.456849934232725
BRMS1L	576.525563991698	0.485108298167089	0.164660472000329	15.6323025205236	0.155339716507087	0.292955816913262
BROX	2557.37139639068	0.574726516620871	0.166172982052676	18.2155343890008	0.0767123193211819	0.168834136756144
BRPF1	932.967649515248	0.346943511922296	0.120052917178957	12.5575636808337	0.323222859096241	0.503565869321128
BRPF3	870.954303897879	0.372716857684643	0.137458193159888	9.99140869635994	0.531160112670139	0.708487765911045
BRSK1	37.3692879027276	1.27377865543274	0.397693628368476	21.6402149390957	0.0273134731148772	0.0735182759051965
BRWD1	2014.6611474075	0.460619599249418	0.198675569201125	13.9985772836424	0.233072212221123	0.396736673485123
BRWD3	1312.32687402971	0.454463123929803	0.185976180204614	17.7668558213637	0.0871504328424193	0.186927195160944
BSCL2	750.161599392348	0.51440396229562	0.191889570286168	12.8841803966524	0.300962714870989	0.477676072621943
BSDC1	1335.36640080064	0.290098279022349	0.123735405275438	6.31859231403899	0.851283742272676	0.940083529980111
BSG	9069.96027963892	0.610279753006354	0.139883222479572	21.0438546393717	0.032919542521769	0.0858511813797844
BSN	15.9838159465789	1.35533222741099	0.641194261968513	7.99836670703351	0.713450130592445	0.850861596999537
BSND	9.49897440001492	1.75476214161085	0.882153412362204	3.75190566236432	0.976620480204042	0.99999999313501
BSPRY	295.590564563251	0.703231134327485	0.179884823356249	33.453514023375	0.000444100024336853	0.00220615665442881
BST1	387.867152189094	0.791073671466416	0.245483183717438	34.3310601173285	0.000319244346767119	0.00165827644831417
BST2	71.0645887794413	1.13914807633657	0.611693855459727	12.6510712223577	0.316741473082764	0.496269357787295
BTAF1	2517.88379972976	0.457190575559648	0.166459218824122	28.6873421128128	0.00253766226159562	0.00999440127226154
BTBD1	1633.03412524562	0.478151609133408	0.126441388524749	21.5490159587999	0.0281093081568645	0.0753257680612664
BTBD10	465.823435539198	0.456572027292609	0.169221081900229	9.19097058361842	0.60426990278224	0.770247894074351
BTBD11	385.254872906199	0.504079848877095	0.158413475366364	17.0606488793745	0.106094360805663	0.218578249066801
BTBD19	173.521378845355	0.574142301763274	0.225276344414896	15.5788048993239	0.157501775213002	0.295952930035138
BTBD2	2003.53005324333	0.254593407728623	0.123500003174889	11.6022467125412	0.394270860202361	0.578430432664728
BTBD3	3201.21234006035	0.713818618146724	0.10746090373993	132.918349531108	4.46421254484728e-23	9.56908708150297e-21
BTBD6	1079.8810008376	0.38661701140612	0.145632232052528	10.8113154849886	0.459203522117009	0.643025350415985
BTBD7	1454.07067879573	0.384526348987776	0.135710489402454	16.0872752867228	0.137921620104734	0.267647377780052
BTBD9	1004.91150696232	0.493432631883977	0.127479866555039	44.6148189750805	5.67032891709286e-06	4.85762998939218e-05
BTC	1133.39875736691	0.562471788540886	0.225090591405245	12.1271484018952	0.354162202338853	0.536905741849789
BTD	234.463306899747	0.797980336025661	0.172690508570615	27.2020416722761	0.0042829676684811	0.0155629908039681
BTF3	9717.2149476219	0.260012277716401	0.132299037544977	12.6720034465966	0.315302460271973	0.494437642775312
BTF3L4	1739.79841908729	0.427743215954541	0.131759374865129	15.7063373282065	0.152387875513012	0.288468931201775
BTG1	1787.67573660961	0.496380270106433	0.109942967647767	35.8017904001621	0.000182567744294247	0.00101842676627486
BTG2	1460.45969991128	0.717702460925669	0.131572487678903	46.4838402568633	2.65497749238598e-06	2.50512987073361e-05
BTG3	1052.39040880476	0.595830649164235	0.172957726448903	22.3194991067473	0.022011639295465	0.0614283268925656
BTK	196.40070167384	1.37464663113993	0.374406170534474	34.8619424359594	0.00026113245321616	0.00139157836547273
BTNL9	218.981933887025	1.38284774388215	0.372386657749452	26.0200697699033	0.00644543889840867	0.0219842475614601
BTRC	981.077796067203	0.230663021419077	0.111542058964954	7.72723414300964	0.737509392028461	0.867691039354283
BUB1	457.541903560283	1.01795919209537	0.248438227349791	55.2690245082854	6.91890159400428e-08	1.01167596674595e-06
BUB1B	720.902631679351	0.853669107243459	0.237996867468073	28.9486977839888	0.00231193463574883	0.00920616027187812
BUB3	2115.62481813541	0.429692393494105	0.107343575992803	28.7189833603642	0.00250924349755765	0.00990288249887179
BUD13	385.140580342418	0.307167565747324	0.126835388218177	13.9614737604531	0.2351326309692	0.399333056422658
BUD31	2198.03618713899	0.517175931417967	0.142548366899637	45.097709506143	4.66390423831309e-06	4.10541749662605e-05
BVES	6.34787394182641	1.82352408052633	1.13676123531898	11.0899899993425	0.435755299899142	0.620190261896434
BYSL	776.159251438046	0.697396262342273	0.191265596354004	27.5413723483888	0.00380379579810811	0.0141224767894012
BZW1	12598.2082661667	0.73430834090193	0.151710489266029	41.0008311237164	2.40924845979625e-05	0.000173433180480295
BZW2	2145.15991754884	0.692282160408243	0.14303506922453	81.1532412504673	8.82710589105556e-13	4.09809577416771e-11
C10H14orf1	261.937574657241	0.694697851310174	0.220085499057805	11.9173494797807	0.369887788062978	0.55345826835593
C10H14orf119	693.987294311545	0.22043960112039	0.122301874203379	9.54261705453393	0.571936121433073	0.743863988558933
C10H14orf166	3166.73285917458	0.324329301498788	0.158774778380455	5.4840098948581	0.905484261797295	0.971025727338001
C10H14orf169	418.355284514224	0.680119781185068	0.143678188558838	41.1994661569306	2.22679484834496e-05	0.000161801981245231
C10H14orf37	530.811803966092	0.94365636691018	0.211809891906346	38.5153845587668	6.40137376890684e-05	0.000408039481397355
C10H14orf93	282.147490698688	0.647564310211649	0.188727706658555	14.8432952740154	0.189783946260078	0.34005840224049
C10H15orf41	199.00082771822	0.542020999487132	0.222331235515357	10.8852203609128	0.452928739996547	0.637205780071946
C10H15orf52	988.223342166291	0.550411916176763	0.17077688176475	7.11931707149921	0.789340254499988	0.901764290294282
C10H15orf57	857.002056759793	0.386124288292917	0.167057223660472	8.9146031003126	0.629774705029992	0.790602790366253
C10H15orf59	60.4233150878957	1.13363448078718	0.413927768439683	13.9890040880836	0.233602524088581	0.397337266407294
C10H15orf61	70.4807720830026	0.947273449883915	0.278151360336902	10.2072321188325	0.511848557166668	0.691050427388849
C10H15orf62	855.658666954689	1.33131360412537	0.225045982794153	58.198407820641	1.99983804843569e-08	3.39753261702619e-07
C10H15orf65	12.4541582485088	1.86763551417943	0.737691182771737	7.66641218806939	0.742837731696878	0.871000610130622
C11H2orf15	0.0859033601223672	-9.96578428466209	7.25997055189544	-0.114149382477823	1	NA
C11H2orf40	176.897933190094	2.45620508223299	0.46348320702914	67.0096847871329	4.50446350881427e-10	1.15618388839616e-08
C11H2orf42	686.171635280538	0.512464160546874	0.18057135191804	14.3882046173906	0.212251753621051	0.370273643611303
C11H2orf49	748.000144148601	0.258582343188917	0.129356284207584	8.64634890049962	0.654499011578278	0.809098753560999
C11H2orf50	2.96558615765316	1.75252665905991	1.33000946600261	5.41238700993972	0.909563722264133	0.972708425237515
C11H2orf68	1980.75544722235	0.279664436214462	0.0846218509941598	34.1232925484391	0.000345275416483822	0.00177518611041912
C11H2orf70	0.0535975696265391	-9.96578428466209	7.25997055193951	-0.776175894820643	1	NA
C11H2orf71	0.857134415548266	0.139808662036329	2.50125722004067	8.16164298919993	0.698755075811639	NA
C11H2orf73	3.19143070166156	1.83493525900264	1.16289323756349	10.5380768131219	0.482732031332636	0.664670984373112
C11H2orf81	7.03106880248697	2.88071959078515	0.968144152065915	19.0649437460962	0.0599376643815823	0.138878104832624
C11H2orf91	0.395429222003732	-0.0739220946369468	3.71431768544928	1.83678015917174	0.998992411776686	NA
C11H9orf116	382.435186892347	0.485499069521395	0.261026661020339	9.22665348923164	0.600979982602669	0.767178514284159
C11H9orf142	2849.13666014404	0.773053841422591	0.231799694353529	13.9258414021103	0.237124181973666	0.401902350486826
C11H9orf16	1960.58431151822	0.78704377644358	0.173336560312572	23.1860597610526	0.0166369800639753	0.0487853635513643
C11H9orf69	649.114255283839	0.754333101737463	0.152934555339875	34.5346337193143	0.00029560259596117	0.00154744003793755
C11H9orf78	1453.96530083805	0.329770546656049	0.105962058890278	25.4477261645015	0.00783523580332413	0.0258976650592483
C13H10orf113	1.65083416356277	1.52440158012315	1.56588344938832	6.90684627939571	0.806576308594915	0.913427722677549
C13H20orf144	2.02560006147307	1.30963208099898	1.6723143286218	6.68753373112625	0.823793849144412	0.923222774704419
C13H20orf173	0.157426695768498	-9.96578428466209	7.25997055181298	0.633149531279571	0.999995241724494	NA
C13H20orf194	901.749957039727	0.47916442705924	0.120744507581605	34.2651350572295	0.000327289180433942	0.0016952569914045
C13H20orf196	156.506570201614	0.539157124590194	0.207949364288577	10.9083197235532	0.450975685110431	0.635389768498012
C13H20orf27	644.852571163243	0.381278585982381	0.150914625677379	18.0125500348037	0.0812898649524714	0.176689265256456
C13H20orf96	29.5292544711803	1.42551668663705	0.523305096476949	12.9201923237564	0.298573609804818	0.474931685794369
C14H8orf22	15.5346279084355	1.40984971582889	0.684300677727102	5.05948486155287	0.928251570854678	0.982537787203142
C14H8orf33	537.873463842415	0.315742176354521	0.131491263074379	9.28199824035221	0.595880195911345	0.763085678620675
C14H8orf37	320.975481185747	0.719943586554869	0.211522868840437	25.510644427028	0.00766952069613963	0.0254669038408895
C14H8orf59	1567.76711738622	0.547154253027916	0.202041305451683	13.4497580006361	0.26494798207587	0.435897517012061
C14H8orf82	206.726550545011	0.541691007106627	0.178717488134767	16.8928555077796	0.111085090686633	0.226475107987957
C14H8orf89	37.6035325673165	0.899836128856281	0.414102905785575	9.56358925433506	0.570015941316088	0.742085107034816
C15H11orf1	11.0990899121089	1.98041896357543	0.710141681328858	15.6236019453899	0.155689676891053	0.293478463811192
C15H11orf16	18.2637132562042	5.93786935476818	1.42353972112733	132.703710068433	4.93451114762171e-23	1.03568192826489e-20
C15H11orf31	2088.25038103906	0.79996398409328	0.227425927200517	19.5770067717754	0.051490380550219	0.123113762632771
C15H11orf42	578.802410961044	0.776499007941689	0.165030470294335	37.6500741843574	8.96171771195153e-05	0.00054784481243359
C15H11orf49	327.653630007531	0.980647944394867	0.212769918241394	44.1061761457718	6.96258345876671e-06	5.85025413305632e-05
C15H11orf52	119.137772660594	1.81365169069072	0.473183647951947	42.5208312852629	1.31570064709075e-05	0.000101687964473462
C15H11orf57	1083.05323739348	0.2868272827689	0.102714689296009	18.1162193889942	0.0789227944568291	0.172736843961617
C15H11orf58	3334.09077237296	0.429168065799407	0.136871773920571	13.0094899550519	0.292705602814874	0.468036282129743
C15H11orf63	0.0844193937671058	-9.96578428466209	7.25997055193951	-0.309090764610481	1	NA
C15H11orf65	17.0335895800812	1.92584856428257	0.64860871976993	13.2052634082844	0.280121529302156	0.453966757332031
C15H11orf70	26.7129784942569	1.47069280072265	0.498131872577584	19.0096763533679	0.060920036800221	0.140604561453339
C15H11orf71	195.096301230415	0.798418215864924	0.257171479655665	11.3301454549413	0.416033558200457	0.600907538650969
C15H11orf74	675.083893900401	0.422505531064735	0.155736323518803	10.155478559854	0.516458425205253	0.694976004293097
C15H11orf91	0.166864508121744	-0.12972141113639	7.25997055183537	0.515329826110552	0.999998388791739	NA
C15H11orf94	0.981307754650325	0.0676578823532081	2.77873172518879	8.09731447296789	0.704560917332113	NA
C15H11orf96	717.065997029399	1.20415893485519	0.242726610525985	44.1903961851127	6.73012383734718e-06	5.67386046856521e-05
C16H1orf105	25.9085997017314	1.39541651788216	0.733185181129412	4.81376359525757	0.939849095817516	0.987704652763803
C16H1orf106	906.096666711048	0.60425923247123	0.185853402343242	30.5541855498938	0.00129604685384158	0.00557583281683249
C16H1orf112	242.587342350416	0.651141228478339	0.179095177241981	19.6757401224707	0.0499909704967087	0.120170372767619
C16H1orf115	1194.76595581257	0.735835198096105	0.156901165540087	39.1171000651613	5.06004066069131e-05	0.000332100193069281
C16H1orf116	2020.22448765943	0.435969604232258	0.140011250553097	16.8671506337138	0.111867122556635	0.227631857442299
C16H1orf127	0.0427223308074673	-9.96578428466209	7.25997055191682	-0.895189987937743	1	NA
C16H1orf158	24.4791402438639	2.2174145491307	0.677797798361516	28.6629085226809	0.00255981953761705	0.0100659258125382
C16H1orf159	346.524667087751	0.384531977364827	0.200095668672025	7.52460210100793	0.755149549554663	0.879458313044153
C16H1orf167	0.0529891550071342	-9.96578428466209	7.25997055193951	-0.782069339575031	1	NA
C16H1orf174	548.835801223365	0.479187779924038	0.140975919245734	14.0034114920644	0.232804763025109	0.396448881862147
C16H1orf186	146.690533203429	2.43779391532318	0.468555334848819	45.469722412043	4.01086704822925e-06	3.58699334907994e-05
C16H1orf21	1275.54290434426	0.488323539985792	0.133629112537868	21.7110180571292	0.0267100682983765	0.0722100048495892
C16H1orf27	1013.13660703164	0.924154707930078	0.236185700127768	12.7916606641045	0.307160248730417	0.48537148864161
C16H1orf53	198.972663852821	0.398706581390105	0.220809213590702	8.97126458160517	0.624544850801446	0.786153195401908
C16H1orf74	108.884042245667	0.376369502041212	0.222925152545623	4.43599947739585	0.955387484230846	0.995248806729776
C17H12orf43	335.572055718309	0.542744944994214	0.154030126375848	19.0471457665121	0.0602524603675998	0.139460649450102
C17H12orf49	868.33660868681	0.243821527313248	0.127483948406382	8.99106874568105	0.622716766512862	0.78512781907705
C17H12orf65	212.18073161106	0.483782768595227	0.185912501018957	7.78425154069782	0.732490027118438	0.863823662606277
C17H22orf15	82.8764014584126	1.01525592306032	0.533302623453764	8.43544561369629	0.673847453524157	0.823768495392443
C17H22orf31	26.5801851275853	0.883937312411125	0.406754644061752	11.3125249756965	0.417464554639497	0.602715198583492
C17H4orf33	181.880856162038	1.04163275565593	0.298147707719465	3.71296399785768	0.977574098760637	0.99999999313501
C17H4orf45	1.94772045621052	1.90740690900809	1.60270189383094	17.7650673539919	0.0871944152475197	0.186983791439512
C17H4orf46	393.010988008981	0.915564051267866	0.227942490759935	18.1100166867088	0.0790626936143936	0.173005453261991
C17H5orf52	13.0715226854326	1.97667631063586	0.708736263077416	10.4758710726587	0.488156975504826	0.669790595808426
C18H16orf46	72.1181373217718	0.594377718937297	0.299297825470746	9.38439513321214	0.586456651822233	0.756256964964235
C18H16orf70	800.621885147303	0.491435548987567	0.132259293784076	32.138554637823	0.000724641104732457	0.00338765513207756
C18H16orf74	182.443669709169	0.736015123354596	0.262344804503258	15.1749951736314	0.174624932729415	0.319610300630533
C18H16orf86	1.28521403975122	1.83586997508852	2.26173414974543	9.18341675652835	0.604966520324075	0.770899975841753
C18H16orf87	309.961331079998	0.618419504393681	0.163327170551083	24.118294944252	0.0122435926561672	0.0377153567388951
C18H19orf12	606.27987551559	0.26285605373384	0.100839137703671	8.18857984944833	0.696318145822657	0.839222055280579
C18H19orf18	75.469003356181	1.16650489663482	0.345948525646629	14.5286625965927	0.205107344031849	0.361331733754267
C18H19orf47	157.748570970207	0.718936410919443	0.264616070441949	17.4605094951717	0.0949726701114903	0.200482381359499
C18H19orf48	381.210717223955	0.897105100797928	0.23421346176969	32.4484940199885	0.000646019232001432	0.00306706915777494
C18H19orf54	144.515771383919	1.13802639229665	0.219596370276898	36.2556485461259	0.000153440964454185	0.000875334652544555
C18H19orf68	164.023735179011	0.842016647935387	0.298836402272493	12.3339503608876	0.339071831502967	0.520699364138194
C18H19orf84	0.252515085840236	-0.0496716869793314	5.72317930137378	0.70873132176483	0.999991429132846	NA
C19H17orf100	9.79711028984659	2.61076308104114	0.898367903987454	22.2931167937405	0.0221982615906553	0.0618036165248188
C19H17orf49	524.966011351615	0.330771164703806	0.140524630078005	20.5210647135851	0.0386863268036229	0.0977129335265483
C19H17orf50	7.86386007233229	1.58751227668158	0.921364430090057	3.97253946492606	0.970713424114827	0.999793673211587
C19H17orf58	290.850324819079	0.995167095278097	0.266942836560717	14.8454333894753	0.189682992179876	0.339937971131577
C19H17orf62	1057.33066123303	0.388910075487986	0.13853845821267	8.46048778716573	0.671556154433101	0.822114645827361
C19H17orf67	154.449953597111	1.98010795073827	0.309605028368931	60.5330044025424	7.38082174219048e-09	1.40963201216489e-07
C19H17orf75	671.376273828352	0.559158468881756	0.143805696496011	15.757545959564	0.150373244648442	0.285594354455788
C19H17orf78	2.88488409575682	1.48286650547265	1.17139492200573	7.91402913713509	0.720983676159838	0.856601220056877
C19H17orf80	453.860321147477	0.350935595169316	0.18428634861278	4.22619989222164	0.962826725866273	0.998395305177846
C19H17orf96	51.0624753984157	1.68020905325732	0.472540263170498	38.8913938322909	5.52723156483756e-05	0.0003592522219352
C1D	1525.25686130232	0.59447679565974	0.194751792617157	18.2673995617614	0.0755798113893575	0.166980002158351
C1GALT1	839.83438306318	0.682391148027383	0.201662386382437	16.231116379043	0.132765331622592	0.259931804850514
C1GALT1C1	575.95754041197	0.409033925941871	0.195144898221791	3.48604578142937	0.98262092286532	0.99999999313501
C1GALT1C1L	0.0877551273330653	-9.96578428466209	7.25997055193951	-0.263864645029347	1	NA
C1H21orf140	0.272306651251833	-0.143137604360209	5.62281109953123	0.96287099737431	0.99995843583172	NA
C1H21orf2	675.503821076894	0.545013988874449	0.204591675902289	15.3298435570035	0.1678889912717	0.310035311624369
C1H21orf33	1160.4010346222	0.538447825482871	0.134726906445245	12.8915370582646	0.300473601517925	0.477051436691578
C1H21orf58	1.8357401501378	1.88370923997167	1.84979675776185	6.77572447393891	0.816944056933837	0.919176111411653
C1H21orf59	868.535308677703	0.317042857638295	0.132083906282364	6.3535005013544	0.848767620622232	0.938835146477074
C1H21orf62	25.6487839008901	1.65052413734609	0.481143395013114	24.6638192735131	0.0102071388058316	0.0324288299903343
C1H21orf91	3730.09431605112	0.795454055065312	0.164281932712031	46.3760448710034	2.77425811183144e-06	2.60114130736583e-05
C1H3orf30	0.335452720813574	-0.0739220946369468	5.38716391876212	1.50232559263139	0.999616737329867	NA
C1H3orf33	169.508945595942	0.829320591228005	0.302225871463123	14.8603852811004	0.188978204870685	0.339036759855706
C1H3orf38	550.373746909477	0.361048277551712	0.184396542678305	7.17796257195903	0.784493997116501	0.898839241875403
C1H3orf52	750.937422165884	0.702369865888961	0.159405012615111	42.8765066933003	1.14117904027995e-05	8.99593759100183e-05
C1H3orf58	3149.70576753845	0.639972577268112	0.139900175153628	53.066574630886	1.74590060496439e-07	2.28133276844536e-06
C1H3orf70	289.613611134538	0.746910086576385	0.24713329981199	24.7097882384425	0.0100510516642403	0.0320187573095302
C1QA	638.997155224287	2.0752745609863	0.501960776429439	22.2753270242586	0.0223249335143629	0.0621159754751181
C1QB	436.813349601101	2.2355615820649	0.565953930954596	18.9353010168629	0.0622648087843631	0.143216168058919
C1QBP	1224.24317877083	0.718773692760727	0.134114414367843	54.3633805778122	1.01318629280853e-07	1.40500279516855e-06
C1QC	594.435338809428	1.75977552922767	0.52774928041317	22.7849238076369	0.0189507515427419	0.0542692855080595
C1QL3	36.2196990874947	0.809075481348455	0.479328491165261	4.7656169090701	0.941983909310519	0.988570836142352
C1QTNF1	1083.32005623134	1.68389761488104	0.299361077753629	76.3769191057553	7.37288516030899e-12	2.79766973813683e-10
C1QTNF2	169.008032328535	2.1366921670841	0.371886611974072	52.8833846470446	1.88503405067802e-07	2.44568905905418e-06
C1QTNF3	497.30640170222	1.62925426561473	0.412784144097725	36.7795231613612	0.000125453739298801	0.000734602555400044
C1QTNF4	13.5865145885433	1.86482491456147	0.71115155686062	14.8997059516481	0.187134641684821	0.336718690418598
C1QTNF5	276.025795077047	1.13618867340988	0.33747922152626	15.2245712703932	0.172445071458309	0.316246085811729
C1QTNF6	751.552678626506	6.29304469339245	0.668032221094517	232.374248781738	1.35496583193194e-43	4.55020109126611e-40
C1QTNF7	448.540176441628	1.36043323330903	0.238938881546162	85.0801634471	1.52438219708693e-13	7.85544165961753e-12
C1QTNF9	50.488819590039	1.69636405006106	0.472482660628454	23.6625468010478	0.0142333796975211	0.042734389811336
C1R	2917.73677942372	1.37299035072845	0.279320281480278	69.8886113342576	1.28270393931757e-10	3.68690466095716e-09
C1S	4142.57031687943	1.34447123076276	0.295009314367476	61.0348204294825	5.95247453731484e-09	1.16443115973162e-07
C2	95.1792837573332	2.47901507750726	0.575933676720331	37.2705553479769	0.000103799477441418	0.000622086755195456
C20H5orf22	609.812548873689	0.486622717338764	0.166963417767564	7.74957442333471	0.735545468895625	0.865987241602077
C20H5orf34	213.633552879797	0.36945690918105	0.191633578177371	8.24120152403322	0.691548271930143	0.83582305387322
C20H5orf38	379.693014726081	0.882643428100269	0.279257999808318	11.318260024808	0.416998515463278	0.602085495382987
C20H5orf42	686.087851408354	0.592607654945852	0.14186443841581	28.8527671328278	0.00239244096050668	0.00949769025823365
C20H5orf47	0.600051170617363	-9.96578428466209	6.12601622160679	1.89753374243207	0.998824889207279	NA
C20H5orf49	3.81524736825507	3.1773559207827	1.22068406119185	7.4125124196145	0.764761611364764	0.885585155597048
C20H5orf51	2403.44398027707	0.453092960329373	0.134231743202722	14.4983519730729	0.206633085666467	0.363271097032864
C21H14orf132	100.810346658515	1.25684290670195	0.517328649976139	6.06967205576666	0.868675277633122	0.950354208481365
C21H14orf28	249.725973591732	0.548953382951405	0.198032319019071	10.587752188922	0.478417465876513	0.660656125004857
C21H14orf79	127.607508492086	0.813570230550337	0.25695892447722	17.4858707691253	0.0943026779535204	0.199381391194699
C21H15orf39	448.176355703035	0.825945287525155	0.215070446416194	21.5494442283425	0.0281055212685176	0.075325638206885
C21H15orf40	592.087983292505	0.296009503395327	0.221083387921206	6.06805166561657	0.868785239948288	0.950354208481365
C22H3orf14	21.559282653081	1.84840511263526	0.5406290852073	22.017219805411	0.0242401784666255	0.0666232923099218
C22H3orf18	76.5548235431194	0.602420027622559	0.268528153382748	16.6921409622495	0.117317542857599	0.235996740153996
C22H3orf20	7.40662010410786	1.87650699991737	0.914717188630118	11.94060476268	0.368124311555358	0.551556867454559
C22H3orf22	6.14757466663077	3.25686358350083	1.02967612017026	13.804079712059	0.244024781819514	0.410661933423652
C22H3orf62	257.754079364948	0.408458734943952	0.183731393679026	10.2342997009645	0.509443133574701	0.688910718013198
C22H3orf67	85.5629996017383	0.650136495641115	0.321031992590525	7.95534069524791	0.717298685318563	0.853834182695323
C22H3orf84	1.57509131133189	2.61482410771684	2.45095473413084	8.52189410137282	0.665930058458172	0.817545295821989
C23H6orf106	2814.69828495692	0.635395815109135	0.137814746349678	45.4134140275135	4.10356906010147e-06	3.66177205456087e-05
C23H6orf132	4167.00642269336	0.993643891002804	0.213331826236157	32.3375342450888	0.000673161703688779	0.00317523470506801
C23H6orf136	276.720895899377	0.624752438195445	0.239502305473487	16.5866253131222	0.120711636603174	0.241363378576694
C23H6orf141	178.763508670148	1.1023827521994	0.227801478770224	33.4122885891409	0.00045101146368553	0.00223684738719298
C23H6orf15	62.9951032395203	1.33718317392421	0.4749092663053	20.4088470788515	0.0400390058058746	0.100453981818275
C23H6orf201	7.77088825224466	2.18946929971673	0.981286085795951	6.153328489778	0.862940200574444	0.947386372874978
C23H6orf222	22.3788930136208	1.92344366467816	0.699895953624816	4.62558769481552	0.947936045100409	0.991648012609839
C23H6orf223	74.9550973700803	2.07411034943338	0.557566296055915	12.0206497143776	0.362093049274143	0.545155260391894
C23H6orf226	309.270283445123	0.401276271105732	0.211000934971239	7.93878803974826	0.718776407488286	0.854952603456039
C23H6orf25	71.3994636985645	1.16776254719743	0.379781264267613	21.0933884751716	0.0324163282870015	0.0848255322928304
C23H6orf47	876.540848421518	0.545999083660887	0.114853233755547	27.7867918776656	0.0034897817537678	0.0131063583516621
C23H6orf52	320.716116973018	0.524447692911926	0.178363933335329	18.9891225242719	0.0612890430269472	0.141391450417902
C23H6orf62	5544.69533650546	0.235603484580813	0.120136809419793	5.94088191602179	0.877279496472983	0.954856556527341
C23H6orf89	2449.24830622929	0.28589768784182	0.125915041397337	4.95673777899356	0.933243623444132	0.984601831017688
C24H18orf21	429.069967599431	0.33911077198686	0.163270950609112	5.781862688746	0.887515179437946	0.960703951353561
C24H18orf25	883.196306123569	0.422755624802692	0.136129138976735	35.9220194021434	0.000174363101770734	0.000978346459921612
C24H18orf32	1007.83057855334	0.423958931618985	0.191383751445257	7.43778002512391	0.762604542233771	0.883950924550898
C24H18orf54	268.890002528665	0.84838774803567	0.232818385580438	29.7872494591575	0.00171113597667188	0.00709125437967128
C24H18orf63	24.6357558734766	3.79022933964999	1.61025780003039	4.77387290637364	0.941621049357378	0.988368541545208
C24H18orf8	468.6196662622	0.399209199995497	0.15440762211034	10.5054041189475	0.485578390768102	0.667408273944613
C25H16orf45	17.4850213072969	4.13791669118481	0.912962637970327	61.9712519192734	3.98167579764788e-09	8.15312862264301e-08
C25H16orf52	613.023739013406	0.597606500450321	0.166725166436221	17.2144308182284	0.10169084247828	0.211643539723836
C25H16orf54	114.564045622288	1.54935537489077	0.451069634967796	24.9022594264595	0.00942175606989459	0.0303208693582984
C25H16orf58	707.489928868286	0.434673131398613	0.17778193373471	8.90575362749053	0.630591407217743	0.790939868007012
C25H16orf59	572.785116769242	0.928377363019513	0.285327932713398	8.85980926052167	0.634830835229289	0.794287537197898
C25H16orf62	903.716887245741	0.421946481975322	0.115897731576949	31.2279166311179	0.00101336539662208	0.00452232544330858
C25H16orf71	16.1267388149562	3.14054894603418	0.670814329691809	27.5077448358615	0.00384888108865438	0.0142614267670996
C25H16orf72	2425.86221535023	0.675539213723916	0.158111559752127	46.1605934348262	3.02876587049431e-06	2.80067019387746e-05
C25H16orf89	22.3503135093551	4.46508855657716	0.844201299702281	88.9204148471827	2.71254095685362e-14	1.59809905671473e-12
C25H16orf90	7.24590872172159	1.49621894314358	0.854577800462041	4.17870649696073	0.96439465431619	0.998488663985248
C25H16orf91	1004.61093846319	0.712898146747226	0.147482868107647	39.3102966626049	4.69114826737545e-05	0.000311542341593105
C25H16orf96	7.22559462152339	3.5280748310925	0.662573462667599	27.2274815769669	0.00424512297573255	0.0154367411727188
C25H19orf33	0.267304682832583	-9.96578428466209	7.25997055180101	0.875087896167649	0.999974511155331	NA
C25H7orf26	576.145606477622	0.377667313559985	0.169459380644665	6.80624071345858	0.814550401036536	0.918020809401788
C25H7orf43	568.746202011591	0.649561640425563	0.162753793972777	14.3213202745765	0.215720629451193	0.374799945055798
C25H7orf61	13.1508878864685	2.30946890072139	0.715194998815618	15.1660519852834	0.175020514155093	0.320153276414976
C26H10orf131	6.94037688975119	2.43934406040562	0.849220377715329	17.6297814465202	0.0905781356556599	0.19272368648184
C26H10orf2	499.614889482202	0.414166104380766	0.149888129638311	11.8854023557622	0.37231857026259	0.556186749126699
C26H10orf62	12.0753305135005	1.49542156555759	0.955828403846291	3.9525971014684	0.971283182041143	0.999793673211587
C26H10orf76	797.287905364511	0.218559456067759	0.0985947564679582	6.10758695403194	0.866090070479787	0.949344403769842
C27H4orf47	123.982328248283	0.577980240740222	0.227343129501549	8.19699311694313	0.695556340055604	0.838596009503968
C27H8orf4	403.782509436874	1.11777983771916	0.410427825413353	10.0887040861176	0.522426267837373	0.700636772540949
C27H8orf48	197.847735235169	0.953597901323256	0.238008934202823	25.7782716809778	0.00700120176152204	0.023597727382554
C28H10orf10	346.077679832745	0.803466126224861	0.328235083163114	13.2121476606696	0.279686045265115	0.453625865414699
C28H10orf105	0.3528847927055	-0.0266810031142791	6.88877367373553	1.097190256381	0.999919418129508	NA
C28H10orf107	317.807504653759	0.552004588987022	0.226053879595699	11.5686942926689	0.396919727869394	0.581174013286855
C28H10orf11	25.0409897299435	1.46886775091307	0.428164523852937	23.546868174683	0.0147848844985785	0.0441530513949695
C28H10orf128	62.7630750009486	2.26129537017226	0.45265676667368	42.705184884859	1.22218877621896e-05	9.54491536900612e-05
C28H10orf35	511.400962613052	0.433225695698542	0.17622404457768	11.3914019007416	0.411079018129209	0.595758551124608
C28H10orf54	4610.32432004692	0.35484984281471	0.138697793305845	12.266342085226	0.343959824375278	0.52567100283203
C28H10orf71	8.03253489946269	4.03638507473751	1.22586437293428	16.3901442839629	0.127253742753383	0.251326765608499
C28H10orf99	41.8427138438153	6.26463422747851	1.29763624156446	37.0813768939456	0.000111669256348022	0.000663483418807459
C28H1orf131	430.829948173117	0.405524011790768	0.159218117985746	10.8281421987769	0.457771410609994	0.641599621061545
C28H1orf198	3369.70927008265	0.322966910105308	0.123996884884672	13.0438005312034	0.290472273450617	0.465833002050022
C29H11orf24	368.054515415397	1.12737645317323	0.195702010046915	87.4731651509031	5.2040412787991e-14	2.94539965523941e-12
C29H11orf54	411.208300235608	0.620518456690784	0.225908260467135	13.6852524955683	0.250901532162235	0.419362502823465
C29H11orf68	541.138914435601	0.653557771551432	0.16246053840871	16.3196212330032	0.129673702695418	0.255130889132896
C29H11orf84	736.018320040918	0.322917018366806	0.184336613110478	5.70560667253841	0.892267273194717	0.963208855483545
C29H11orf95	364.806944088704	0.589907014602713	0.299634942758279	6.37957271731301	0.846876391761249	0.937696995780024
C2CD2	2600.20650106787	0.377668791826857	0.125358995208629	20.4395017079332	0.0396652631679664	0.0996900820221224
C2CD2L	586.86362978482	0.523122895233629	0.222731890569473	4.68701413860015	0.945372056484601	0.99014435046402
C2CD3	613.551145405463	0.704622512073939	0.188869673116417	13.7453500237975	0.247405950203378	0.415069316456941
C2CD4B	62.9313880127588	3.71657850021367	0.532822740784433	99.1277714553981	2.65756692777999e-16	2.24447202597154e-14
C2CD4C	26.4552586007833	1.73215359476859	0.57281864526244	6.56278412081883	0.833305283212014	0.929043343757517
C2CD4D	10.6653273839213	2.07611809364467	0.753609556700769	14.3022507229682	0.216717586090493	0.375851492695589
C2CD5	1265.1363067807	0.609136411979879	0.154109741262095	21.7775935808667	0.0261539874704364	0.0710019797280819
C2H2orf47	208.239913931229	0.482729955489037	0.186690157004821	4.17930581663825	0.964375133153203	0.998488663985248
C2H2orf69	256.873853320292	0.851060350777381	0.231984436592942	17.2808248254313	0.099838941026078	0.208829525872983
C2H2orf76	393.431425580962	0.543415560106849	0.206945613860455	16.5402439391129	0.122229721009105	0.243745709482626
C2H2orf88	17.36829005109	1.96088195964118	0.639999541467367	13.0554025047708	0.289719762568996	0.464811170953317
C3	10294.948673667	1.97250762687426	0.325542078699567	89.5717877124373	2.02236271608133e-14	1.21637571242755e-12
C3AR1	145.289842516438	1.69791946451048	0.59983849040211	12.7953863058925	0.306909027236778	0.485012548219124
C3H1orf109	295.093614971413	0.399782610686258	0.157487182050065	8.61385751160515	0.657486555096618	0.811547206483812
C3H1orf111	22.2446770278031	0.629914649531969	0.592657629447101	3.64643251060261	0.979143157985855	0.99999999313501
C3H1orf123	1075.51202521439	0.480872234705318	0.144304767883656	26.3837739911447	0.00568809537544924	0.0197906074521455
C3H1orf146	4.70046358072305	1.90171912548674	0.936602187891895	12.3435780784693	0.338379370264746	0.520061474558686
C3H1orf162	25.5285809919226	2.14761753455855	0.814608560275665	9.81753347455879	0.546871127105958	0.721557615091216
C3H1orf189	17.2227517186122	1.46579056173499	0.54923350977261	13.8028493091969	0.2440952653776	0.410711941719688
C3H1orf194	5.73116147458353	2.09076135909408	0.978037455150547	12.5961526988472	0.320537598461772	0.500440647839468
C3H1orf210	213.11224000054	0.668799148620831	0.184906249043349	19.8891379468342	0.0468844288922074	0.114008491159677
C3H1orf216	219.324277069003	0.7988781703414	0.187636936042282	13.3240489543327	0.272674373827849	0.445382553685166
C3H1orf226	541.985729360342	0.418571360439625	0.160837462943609	8.1311358025431	0.701510932213739	0.842657909453597
C3H1orf228	46.1654739535	0.658141144800214	0.512815303541934	4.62930987459833	0.947782768745488	0.991648012609839
C3H1orf43	1291.03010086473	0.223954243012281	0.117071657616637	2.73673303735188	0.993767601207358	0.99999999313501
C3H1orf50	518.94763014277	0.432161010799305	0.213824178214783	3.10428737268228	0.989274578483184	0.99999999313501
C3H1orf52	253.5252650808	0.704705798370554	0.17025904262418	25.5369492800933	0.00760123227766228	0.0252985181966662
C3H1orf54	270.951314926889	1.08593043183535	0.272621540886197	30.7172048838231	0.00122134297258857	0.00530362921437221
C3H1orf56	23.5249763579342	1.64444225747108	0.50726230739833	27.7631436633045	0.00351891984678339	0.0131964082795997
C3H1orf68	1623.88721412667	1.9889641656262	0.389306869811461	46.4566143721936	2.68461675182969e-06	2.52831704954434e-05
C4BPA	6.08989312484578	3.46225844564331	1.2442053212888	22.0722445570436	0.0238194909860346	0.0656910654089256
C4BPB	3.39873266038191	2.86889680349214	1.09062277699091	10.8006556682653	0.460111818746046	0.644049061601466
C4H7orf25	271.315141801329	0.470883823941338	0.157401260546361	10.2081378437635	0.511768005113657	0.691010615016508
C4H7orf31	0.876304958099172	0.958218495073866	2.90145072635947	7.15162658905669	0.786674860017401	NA
C4H7orf49	219.101776609211	0.375271793807939	0.19915553599493	13.7445506650816	0.247452208135691	0.415098741443924
C4H7orf57	376.901803045361	0.463316648954799	0.177323456388506	6.72011018318574	0.821275503360489	0.921476785678277
C4H7orf73	5059.87870574576	0.61845044702493	0.206030661211902	10.7633881546703	0.463293616053939	0.646685352952603
C5	16.2324352143869	2.19306359168661	0.685328150355164	8.230683842552	0.69250259590168	0.836525084300495
C5AR1	157.869654296146	1.6419807697605	0.479735222519478	10.3997239910278	0.494830091230585	0.67627562288578
C5AR2	768.966916925856	1.65011344055878	0.348036247343132	20.1290604840594	0.043601816135971	0.107492107344143
C5H12orf10	606.380130048486	0.331821249970203	0.152293086720192	12.2221003399536	0.347182387739428	0.529671986867701
C5H12orf29	698.435577884263	0.393279009669128	0.169029002285243	7.85141341440067	0.726548974685579	0.859816474271099
C5H12orf4	232.81000713976	0.506001899322563	0.195029681928786	6.74190776557862	0.819582621267564	0.920455958869099
C5H12orf45	656.088772025372	0.426720628947417	0.152453101124535	11.7655694745746	0.381520172251326	0.565581984606569
C5H12orf50	0.687207697475677	0.198254670357928	2.91444026383535	2.89539787665251	0.992037223141538	NA
C5H12orf56	456.466183537733	1.52826814017821	0.30065301247697	47.4985778200891	1.7536187463768e-06	1.74057458722888e-05
C5H12orf57	1315.93862217385	0.416475291493041	0.15836292660569	15.1621131033106	0.175194969859214	0.320437029922728
C5H12orf66	202.882252236887	0.508200907795077	0.188170331362617	6.84098659642638	0.81181061840113	0.916779069059767
C5H12orf71	2.49354423367146	1.39323390720391	1.16139417089608	11.1270170541982	0.432684398578372	0.617389557889357
C5H12orf73	193.797960848734	0.493460520675196	0.18999850182119	16.607227631876	0.120042457517014	0.240239916220731
C5H12orf75	305.309501570729	0.544468138550041	0.26024387166076	12.1998546934104	0.34880988415042	0.531329409932563
C5H12orf80	1.37989113358374	1.86909428244821	1.71840317592509	4.22349800598747	0.962917066133361	0.998395305177846
C5H22orf23	31.5374951602626	1.70548946930291	0.484422558291766	12.7619163217984	0.309170895783185	0.4875927034389
C6H4orf17	35.2495009394661	0.982617977870565	0.437453174764492	14.9227261863995	0.186061968202577	0.335207671433631
C6H4orf19	13.4351205781356	3.29056489641346	0.977720174664956	13.0270872695888	0.291558686542604	0.467017725983538
C6H4orf22	1.27312569353135	2.1494856569221	1.73240981013656	11.7391008583969	0.38357029968524	NA
C6H4orf3	3568.31837761082	0.320823803302945	0.147028437621749	6.41077844024971	0.844599445969066	0.936125982552985
C6H4orf32	428.655560013786	0.745721125912734	0.225149481900185	13.6560839258236	0.252611151533286	0.421555581600479
C6H4orf36	8.40266455262202	1.3310360321902	0.856775293004619	5.05015565932007	0.928713269056581	0.982703689645051
C6H4orf48	73.9593595857069	1.45113543853758	0.405839015920685	15.1452083032856	0.175945281717381	0.321407205922349
C7	335.933210460009	2.73036516598284	0.435058083585778	97.8694924134317	4.71283709485094e-16	3.75331836459098e-14
C7H19orf24	309.520395922326	0.651735913411708	0.193058809280981	16.4882555574999	0.123950508846435	0.246396882670364
C7H19orf25	548.77905309371	0.736916517502119	0.17518294936875	24.2812501877871	0.0115981952282771	0.0360747199219753
C7H19orf38	10.6018111158902	1.60608931937208	0.762117799535319	12.3858826401834	0.335347372015649	0.517255928863455
C7H19orf43	1554.43210337869	0.45397691789101	0.143230292643985	20.328888128104	0.0410290639072204	0.102465866220449
C7H19orf44	175.106375063388	0.760491465223387	0.219890802110652	30.2646299125603	0.00143979681122974	0.00609719755138043
C7H19orf52	421.667719665235	0.455567075875951	0.119931355954398	28.6587052586997	0.00256364996892125	0.0100770548622306
C7H19orf53	1952.59247631691	0.358551819168469	0.140617227080026	10.8723550898575	0.454018198338412	0.637892244496246
C7H19orf57	84.5684267474709	0.957416255521816	0.264403823242089	18.4466305622606	0.0717791822244611	0.1602619970165
C7H19orf60	1112.80951283427	0.489946733144269	0.169639342392203	16.6298919123278	0.11930994280384	0.239106429038649
C7H19orf66	292.536537166831	0.942962569581159	0.274049865513941	33.7653682560242	0.000395061528598446	0.00199851738381373
C7H19orf70	1412.81755496097	0.452674840102285	0.16934980487472	11.4232855065897	0.408512747712593	0.593020414528893
C7H19orf71	277.225113997288	0.710564906720778	0.21533416480422	15.9332376895528	0.14362756158476	0.275877191455799
C7H1orf35	961.645146843185	0.48385105819826	0.184084452268842	12.9586137042741	0.296039009174796	0.471899399751488
C7H5orf15	1107.83891692302	0.435033342120874	0.181684382555835	3.78685459238534	0.975742226477703	0.99999999313501
C7H5orf24	2286.46291089643	0.571990731476041	0.162729592070236	19.6271001791016	0.0507246308177704	0.121600307715319
C7H5orf30	433.03879337508	0.588692972688219	0.226991834364521	9.04414720444618	0.617817217252379	0.781517792033525
C7H5orf45	230.231455539895	0.476990327846798	0.280022494448188	2.21876608352426	0.997567893145116	0.99999999313501
C7H5orf46	1354.20511835298	1.30871672808213	0.477227457463089	23.104456394237	0.017085050991463	0.0498114154864692
C7H5orf63	229.584774897875	0.431675845843141	0.194313062030375	4.07475554448234	0.96767895346591	0.999522607110522
C8H8orf58	828.664556140985	0.476232482758153	0.186224116595211	5.16585129045819	0.922869001842401	0.979657948375878
C8H8orf74	0.459918467938453	0.139808662036329	3.71190846304358	2.93438495303121	0.991564883482036	NA
C8H9orf152	265.659156925574	0.837181919208331	0.18794128061323	49.9800705190563	6.31125353099311e-07	7.03737949064639e-06
C8H9orf24	5.46834346581611	2.45086878285703	1.0576599355156	10.0064526706807	0.529806820821691	0.707239806064413
C8H9orf3	8947.2444983143	0.627863584834284	0.152050310207372	45.1275844669854	4.60779379190697e-06	4.06134895508021e-05
C8H9orf40	248.055294034496	0.751671158020081	0.188057790544733	18.9874811701735	0.0613185966519483	0.141429329600596
C8H9orf43	13.9044323433437	1.21770160481301	0.594820023401429	13.941563341292	0.236243906173301	0.400719263038813
C8H9orf64	230.79661943329	0.448023232138205	0.210876295773049	6.72375976097703	0.820992497380161	0.921334130740415
C8H9orf72	990.279468575356	0.583225604156692	0.134624476890846	43.3192360265691	9.55556720600701e-06	7.68296582736772e-05
C8H9orf84	83.1958529300873	2.72805575057355	0.583173302517282	57.8206523323627	2.34840316956046e-08	3.89769155382816e-07
C8H9orf85	289.449732190844	0.703117162115822	0.258618263572229	7.43852383282052	0.762540956826514	0.883950924550898
C9H6orf120	496.062368391935	0.490900194822232	0.152240241367552	15.2125316335747	0.172972429009924	0.316928248380992
C9H6orf163	11.8151807063712	1.59511718242096	0.696600809718897	8.85183161123112	0.635566814812235	0.794764212229363
C9H6orf203	248.183796954584	0.477565716582524	0.172789142359833	13.3231119759221	0.272732560480632	0.445431495592467
CA10	39.0407264632584	1.37313352335243	0.386434714727161	26.0817652969253	0.00631052471855487	0.0215912315425645
CA11	261.677324548578	2.1034044196534	0.296917590418027	73.6944412988719	2.41124845859088e-11	8.19295871705695e-10
CA12	4134.18166001492	0.429708901941587	0.166535058544939	12.9526134641596	0.29643385911667	0.47231107285638
CA14	1.88065708339432	1.78237862122915	1.70603111820436	11.885610305944	0.372302717233763	0.556186749126699
CA4	550.331814182251	4.262129041722	0.670833718438462	82.4300793966539	4.99200132375306e-13	2.39485320648334e-11
CA5B	217.962388698257	1.1077200327981	0.316621394654233	17.1962862310284	0.102202072365511	0.21249298896839
CA6	190.773175819144	0.99760907582501	0.377501042940436	7.09311859897133	0.791493190247493	0.903046222553609
CA9	49.1184208784331	0.935303200409215	0.364022329000515	13.8387295563801	0.242046060520139	0.408389388161135
CAAP1	606.097060930244	0.385689608444033	0.165445891686493	18.1503136879646	0.0781577010245266	0.171413629435247
CAB39	3728.81575145479	0.591819140217811	0.112538838648704	74.4025393242039	1.76453671296409e-11	6.18840624573154e-10
CAB39L	358.155064493784	0.7948102708744	0.267121137731385	23.7915425040446	0.0136412535682108	0.0411648372241843
CABLES1	582.423832510509	0.359437239083726	0.167171068526815	7.42827248959406	0.763416868426576	0.88441007670361
CABLES2	445.524397796439	0.330846926403308	0.14561279728247	7.19629401943018	0.78297166716696	0.897848507298793
CABP2	2.52333547142149	2.42179281282451	1.82100522121444	15.2828574151548	0.169910332503862	0.312821938013552
CABYR	293.822141401287	0.434445064554061	0.220017261232858	6.0573779602891	0.869508498652986	0.950770057032679
CACFD1	551.740512602147	0.573355111158464	0.193734835886688	21.4390085916226	0.0290978149241746	0.0775723568281548
CACHD1	1044.4895327454	0.508938698105853	0.158823969416552	26.6227245855722	0.00523766155360245	0.0184177386812453
CACNA1A	60.0157221055301	1.40195419707101	0.378142413570228	21.8911375962483	0.025230309024563	0.0689496129846629
CACNA1C	283.118574313421	1.25145555957141	0.236757724054127	51.7085255307906	3.07868750043873e-07	3.74592236994806e-06
CACNA1D	55.4799434646032	1.51274061628681	0.487078168631414	23.9258164689963	0.0130496081363075	0.0397185127399487
CACNA1G	310.5995746369	1.52864743224028	0.331674841954031	66.5472374138433	5.50761363600061e-10	1.37683507632477e-08
CACNA1I	29.0897016144339	2.7503457274018	0.679363632569828	43.6503011262327	8.36537134433401e-06	6.87693939227439e-05
CACNA2D1	1209.7222034197	0.980340024034293	0.207466836759119	21.4677265456165	0.0288367052761898	0.077011008393307
CACNA2D2	108.000822117828	0.858040379687022	0.259141083171535	23.8629216477167	0.0133236603227091	0.0403939861333531
CACNA2D3	171.121531337273	1.49989749985942	0.238699209083938	68.1869231818396	2.69751924961629e-10	7.27607970020331e-09
CACNB1	181.756922257201	0.604893114390683	0.212701106956474	16.8887638163592	0.11120926035837	0.226613611140857
CACNB2	574.92738098663	0.748953239619784	0.151996920801403	26.8836850440467	0.00478477709069309	0.0170937009929743
CACNB3	766.122004536121	0.513942631603796	0.138353694572533	21.2760602963473	0.0306212147179682	0.0808671533754137
CACNB4	66.6821881930576	1.90615279979222	0.520790477000942	18.9231345309126	0.0624873001482898	0.14359678497809
CACTIN	929.151763326025	0.477440931458971	0.165376185919937	17.5232231817593	0.0933233844012201	0.197621951897024
CACUL1	1822.55435121846	0.267477935433362	0.115024701718226	10.3451035667348	0.499637925860503	0.680151949878948
CACYBP	1660.26681085661	0.794351883353586	0.18578944160836	24.1280724005084	0.012203930408325	0.037616183845394
CAD	1329.2349977201	0.601483128386983	0.181255071666102	18.2549217428839	0.0758509142641515	0.167500325638154
CADM1	1714.82021079022	0.488461474916239	0.121018713432258	31.2857983899131	0.000992086900965294	0.00444508760674888
CADM3	609.770589111599	1.37178254875545	0.303620639767872	61.4478069456889	4.98577906120716e-09	9.91692618995687e-08
CADM4	172.520379088888	0.915695025001493	0.216403395663952	51.4477028805172	3.43193618597184e-07	4.11362773415506e-06
CADPS2	476.270497967632	1.47220741777162	0.283015428885942	46.6451238124382	2.48591718887197e-06	2.36379166770086e-05
CAGE1	84.7565093640734	0.893356429316421	0.251654630103878	18.7757658631921	0.0652392673316646	0.148750254324512
CALCOCO1	3116.68313883791	0.658647623025147	0.174755679939593	13.9639587165273	0.234994211789481	0.399232577853815
CALCOCO2	2509.50786500414	0.857589591189554	0.167741100503832	45.5972407770477	3.80851077390355e-06	3.42885091972219e-05
CALCRL	752.279973904313	1.00476967946193	0.259458513473507	34.4851253012267	0.000301189658988799	0.00157472565424466
CALD1	18253.975076806	0.357529879813176	0.133152805357567	10.36485349695	0.497897482272907	0.678718379698045
CALHM1	1.69861827413429	1.83586997508852	1.58266426477506	9.12186613536555	0.610644517913034	0.775754187106199
CALHM2	636.372946550848	0.524730255815587	0.18254883278178	23.3841668980767	0.0155946775346402	0.0461473281899642
CALM1	12963.8246896402	0.371900674512956	0.104025382590606	20.4013956852241	0.0401303385156657	0.10062139080089
CALM2	17046.4297322573	0.63132920454463	0.212567124944969	11.7012918928756	0.386509784662422	0.570249134673982
CALM3	2451.18213538941	0.396862967405881	0.133447963481712	16.8246154341959	0.113171529133377	0.229613648223584
CALML4	199.268008117302	1.10726499840864	0.234429198296697	32.6056245034833	0.00060939777092901	0.00292073160952632
CALML6	5.85742784977569	3.21092466232683	0.932911456286806	22.432044683496	0.0212318287742137	0.0595904886434923
CALN1	139.31180849393	2.46211092357565	0.456657626573776	41.6382617038126	1.87061888379922e-05	0.00013939016231387
CALR	14046.1984147486	0.592916115179377	0.142767761376226	19.5181797660019	0.052402964232898	0.124718559689188
CALR3	0.979085744341653	2.271061327687	2.17980567677519	10.5166248959542	0.484600108531512	NA
CALU	3093.9312851327	0.975345801792744	0.228071817047193	28.0969730440122	0.00312842894101494	0.0119701319279358
CALY	17.2477803138606	1.68009644021819	0.56979497436794	23.0243479952065	0.0175359037523402	0.0509636412384109
CAMK1	347.332840259892	0.85602857962295	0.207709931760198	47.4661299414982	1.77708266798799e-06	1.75953015613218e-05
CAMK1D	1296.20324408483	0.489758862583595	0.10899913149508	45.7681693259784	3.55301322536799e-06	3.23058048185648e-05
CAMK2A	10.5220808016499	2.85362978035503	0.898507652132393	26.8024546043302	0.00492156753775803	0.0174770293123522
CAMK2B	76.5795422033596	0.480189813298881	0.352618358824842	2.07974517810391	0.998195513421028	0.99999999313501
CAMK2D	2217.33612643651	0.771293105286165	0.16753007587352	25.8913184565652	0.00673590768647662	0.0228334125125871
CAMK2G	1563.23224325487	0.358800517142163	0.120773927714274	12.8971475620628	0.300100947645744	0.476659730905721
CAMK2N1	280.767810977082	0.812776273262388	0.208524371616498	36.4013035380762	0.000145097611778707	0.000832926432971274
CAMK2N2	42.6165322582412	1.15710881995901	0.416916679905026	10.3761166964588	0.496905934724945	0.678053558828728
CAMK4	88.1324438593266	1.28574413699354	0.32990882480731	16.8033706260342	0.113827883033151	0.230421115952345
CAMKK1	968.098909861384	0.629825134831329	0.175104120098855	40.8816540364881	2.52570292974289e-05	0.000180654555666985
CAMKK2	319.04685181728	0.909590012503739	0.282535131303625	13.9589258054505	0.235274622845139	0.399506857888648
CAMKMT	73.1299478112302	0.3497238188046	0.282860017956885	4.95831520337657	0.933168529260063	0.984574158038488
CAMKV	19.4713734656932	1.58564568460452	0.575157379600576	22.843725172964	0.0185936945782678	0.0534508260944175
CAMLG	584.624214499647	0.285196148748948	0.118961345711162	12.381182349535	0.335683383034018	0.517576100761588
CAMSAP1	1725.85196125992	0.777159280541661	0.170979744901615	43.4344194041766	9.12364376608334e-06	7.40363665899369e-05
CAMSAP2	3666.33556653879	0.416045855823058	0.0916833105501268	52.7445771512653	1.99773055182687e-07	2.57367473713296e-06
CAMSAP3	2697.63579900597	0.896531743150208	0.207147755375923	41.4067663095585	2.05089733878874e-05	0.000150870867029041
CAMTA1	742.031881135032	0.49486315323962	0.139602844951869	37.3923327054422	9.90241950819178e-05	0.00059845186163934
CAMTA2	1875.79892000384	0.391389193309879	0.189783948342789	6.02285356498777	0.871835047523249	0.952016278590177
CAND1	4012.89539596834	0.473659065344925	0.124956325618012	31.1122599398336	0.00105721856608841	0.00468688600398579
CAND2	203.452332699977	0.994822448368649	0.292318928097815	11.7609935069072	0.381874149443925	0.565913289147272
CANT1	709.129301408941	0.361179905462975	0.117795943757416	24.7849996246812	0.00980054125917478	0.0313396454262994
CANX	10395.8148310252	0.384030573428042	0.115305063779821	18.0431704700399	0.0805842964999147	0.175534377316409
CAP1	8005.09625926319	0.315056444411497	0.111531501622974	13.4575526772769	0.264474140062557	0.435331218701124
CAP2	198.950126561156	1.03508381491535	0.231193912422373	37.987980705443	7.86026116408065e-05	0.000488514503994636
CAPG	2510.95327613961	0.676813300296422	0.168227442103857	23.1217148952862	0.016989353690648	0.0495898142130766
CAPN1	4354.08071798082	0.619397130765194	0.131702949202138	24.3488654070336	0.0113399564507588	0.0354081485396467
CAPN10	501.65078935669	0.772400743754904	0.18302359726508	26.3729423306116	0.0057093670040884	0.0198444084466754
CAPN11	68.1695811739661	2.74059400874631	0.526650956162941	33.862607782418	0.000380881959764966	0.00193309587085751
CAPN12	1506.32999446712	1.84389688045082	0.3276515582595	44.1606584763113	6.81131564768606e-06	5.73032146076102e-05
CAPN14	27.9818975678454	5.48484937373152	1.40833795390803	141.38452749055	8.5150893870434e-25	2.25750705341497e-22
CAPN15	750.313463539118	0.297749275124453	0.204275042425662	7.25495761371712	0.778076614248488	0.894322059354979
CAPN2	3505.7374958098	0.388116688900731	0.182239890959642	10.3744363647747	0.497053814629759	0.678118851037647
CAPN5	546.3570627525	0.814829294295267	0.266860655197181	18.330573924853	0.07422034013447	0.164644460351143
CAPN6	187.913276581977	1.84742731950528	0.420572730862971	49.147179386183	8.90407585491354e-07	9.50759005832819e-06
CAPN7	969.83105744972	0.258883589539338	0.121145888866014	11.1809138752615	0.428233794107946	0.612774853879767
CAPN8	743.202821391484	2.40422755794679	0.400260632434254	37.7443319333061	8.640081048484e-05	0.000531569444414975
CAPNS1	3382.64997468642	0.458219475853001	0.164922221904427	18.1113799930029	0.0790319261357215	0.172956911014299
CAPNS2	1444.33015469222	0.592435398609347	0.253138459495593	7.87046453085702	0.724858331543112	0.858608005658811
CAPRIN1	5969.62160143493	0.329074590530739	0.11181488386853	16.3733228881005	0.127827478060773	0.252360949975164
CAPRIN2	783.701889344993	0.474785049446891	0.247026054286201	3.17915952205243	0.988139882034429	0.99999999313501
CAPS	108.829263469113	1.12935497067565	0.392039792401909	15.0969228098219	0.178102623460069	0.324338650403932
CAPZA1	5363.77209557352	0.309343131327182	0.140696104126216	12.716725183474	0.312242612651933	0.490977491655527
CAPZA2	2371.12649799943	0.514978408647178	0.150440906342353	9.66874074645506	0.56040714367889	0.733843084291022
CAPZB	797.027013585409	0.584855985082824	0.194026575532026	6.17078980769105	0.861728913298797	0.946626992345094
CARD10	524.102008441027	0.397328534265724	0.222728466195269	7.47898978529855	0.759074254955208	0.882479485852637
CARD11	199.355475031644	1.48843566593825	0.368365503965891	38.419734621446	6.64458753803165e-05	0.00042140948789361
CARD14	445.119411638621	1.94918560681723	0.306699773454001	96.4885715587363	8.83028466497978e-16	6.76507246063413e-14
CARD19	401.50162061991	0.900587102078853	0.187824399619248	44.794537307224	5.27290556490936e-06	4.56766011295609e-05
CARD6	348.149655781889	1.00457782659153	0.223442130774597	52.8760962963262	1.8907913638798e-07	2.45158012810902e-06
CARD9	180.36542080555	1.3009859317405	0.289314627590584	59.0189588145462	1.40982328257975e-08	2.48500631154012e-07
CARF	399.368825074978	1.0410071890927	0.199067889166557	24.9100098809137	0.00939721544604232	0.0302660636224915
CARHSP1	2685.55025620251	0.42454233909979	0.156317277234864	10.2597227927263	0.507187422862071	0.686857792043344
CARM1	920.683704463044	0.348525962131596	0.157451381702464	6.84443008557895	0.811538268102196	0.916586327708505
CARMIL1	1125.80635528076	0.398371447559089	0.178599917692091	12.3026326044728	0.341330553752968	0.522795658395261
CARMIL2	62.7727728754163	0.893921111897486	0.302786494574464	22.8296993047013	0.0186782867863444	0.053626218361079
CARMIL3	55.1744950399968	1.29835355474738	0.367735890580267	25.5108876429288	0.00766888663153254	0.0254669038408895
CARNMT1	1000.74453029799	0.712195103330728	0.147224828916102	52.3722507783235	2.33409042155916e-07	2.94302802903601e-06
CARNS1	16.0271252389749	2.10230536234683	0.645947127120318	16.2032241830563	0.133752373286149	0.261394429616161
CARS	2628.38647608663	1.07779121744132	0.196541610007386	44.9073096010903	5.03770742320464e-06	4.38654999438852e-05
CARS2	780.382692017266	0.789379861729355	0.227467595270334	12.1012427102785	0.356081466465586	0.538963752089474
CASC1	73.8055627669954	1.31704382116258	0.408028203315249	24.6996859164553	0.0100851587964753	0.0320969617106586
CASC3	2205.78902936668	0.109836492769458	0.0887508117834446	7.92865397721459	0.719680311355892	0.855506701681998
CASC4	2358.84371025588	0.369201465805794	0.130784095803213	21.875101422677	0.0253589004128113	0.0692446787393597
CASD1	1082.56091109607	0.755684028325442	0.187905683376982	17.7372520001695	0.0878809593439128	0.18813360070341
CASK	1916.12532579575	0.407219229707605	0.111540239792265	14.7195478662599	0.195699525303959	0.348088783134663
CASKIN1	64.7051566435193	1.26619798105772	0.354138672489598	13.0720156879933	0.288644580609854	0.46366749189842
CASKIN2	836.777135151315	0.570923200293139	0.205763054785845	14.71995093523	0.195680024319927	0.348084824756971
CASP14	4293.76471746384	0.509981098971874	0.264596460088473	4.81225835923419	0.939916521700252	0.987704652763803
CASP2	770.444941352441	0.358014187308423	0.131775606748653	20.1435031046699	0.0434110535357384	0.107100442964564
CASP3	897.616691879448	0.25798577666735	0.143988721227897	7.46376700593601	0.760380083044615	0.883099792107093
CASP6	622.365563773776	0.465146939074009	0.172957943532326	9.3677721748399	0.587985246189797	0.757520315935111
CASP7	290.796241509458	0.287288633375186	0.19247625938263	7.23387448015995	0.779839901697725	0.895565003552502
CASP8	563.960073396874	1.11221642691086	0.256375783626067	23.4565479811235	0.0152294055392233	0.0452391703095695
CASP8AP2	941.507083880613	0.438984686546975	0.185328767853617	13.6527692379623	0.252805970141777	0.421775895701472
CASP9	385.048492037424	0.220235847675074	0.179845387112694	10.3583087463798	0.498473982810944	0.679326136498762
CASQ1	11.6494849644378	2.39412955594855	0.645068303448654	21.8620891532919	0.0254636905483884	0.0694931465338585
CASQ2	119.229080964865	3.05128012941467	0.444800631504856	63.4579284526129	2.09882028364928e-09	4.59664455383145e-08
CASR	64.78504926991	2.14651341768727	0.544470351275901	18.4401232543508	0.0719141509764052	0.160518248368626
CASS4	61.9995571924596	0.861524404617876	0.367438205498972	13.2142082412118	0.279555789938138	0.453524123306243
CAST	8187.266852445	0.55380203135046	0.0953102614185284	66.706106175155	5.14014498056014e-10	1.29623005273224e-08
CASZ1	5333.37166220085	0.898988984526154	0.19610569220644	25.8541897681224	0.00682196447872408	0.0230746621255349
CAT	3143.97735693595	0.851487137503038	0.209522492710836	26.9185689708968	0.00472715784691051	0.0169389122278854
CATSPER2	64.6768903143272	1.32579480889818	0.274718997415051	40.3495271462138	3.11700500318875e-05	0.000217844376723032
CATSPER3	6.60049536834435	2.43641782371798	0.912653179094978	8.59858173494575	0.658890404003136	0.812682587552594
CATSPER4	232.376421369883	0.989923206283129	0.338384545899087	35.0524620591171	0.000242911920522169	0.00130653909436429
CATSPERB	6.68033691570756	1.55572552383169	0.875239801799846	8.8891811458609	0.632120746515734	0.792095471582389
CATSPERD	73.9672158930445	0.480531356402902	0.240770258480243	9.01264821209168	0.620724788348771	0.783808659732404
CATSPERG	131.576255895452	0.837386607158417	0.264255528767353	3.8709174339657	0.973541858493616	0.99999999313501
CAV1	6108.19670631612	1.01832687984266	0.259111813128419	21.6401074837769	0.0273143984032111	0.0735182759051965
CAV2	1551.71209150552	0.972808712366365	0.22884836525051	31.0546795210326	0.0010797326037602	0.00476885844655071
CBARP	550.796686954704	1.25337172582954	0.200819744739983	50.8585806050344	4.38451378857337e-07	5.10066791720351e-06
CBFA2T2	658.708210444013	0.515082742989232	0.146701353948797	26.7382829696078	0.00503227119607346	0.0178136388492066
CBFA2T3	519.042757846002	0.77240859991038	0.216650553167975	34.4286946750941	0.000307683794000366	0.00160443083988441
CBFB	2368.53748252207	0.476869663735712	0.151815373355312	8.27053655832742	0.688884130623564	0.834053980767588
CBL	1698.41835855922	0.393151662188905	0.179715089170218	7.00835639316489	0.798406380130656	0.908105568910674
CBLB	802.690251991624	1.06026936626422	0.250869272791544	40.4729494543543	2.96875878967224e-05	0.000208568761691443
CBLC	289.334893520589	0.564643105444231	0.243782999314459	8.62257907143714	0.656684824014579	0.810955045297239
CBLL1	793.012370295474	0.533855928709688	0.138916110846802	15.7484250539666	0.150730461428029	0.286084030455291
CBLN3	54.3972233365558	1.45599707991808	0.414254123153109	26.2192374621216	0.00601953448152037	0.0207719815496068
CBLN4	200.817179373495	1.29353258894128	0.347460769833595	18.6965122957931	0.0667635406336517	0.15155684770476
CBR3	757.232194367592	0.844168671027617	0.230003927738207	17.3037487655823	0.0992063376673664	0.207894799548598
CBR4	1207.84499565571	0.469532723545366	0.165332179236328	8.38301231482836	0.67863865314729	0.827516958500651
CBS	2588.91545586017	1.2175939050451	0.213730781407782	37.3994660644903	9.87512570731927e-05	0.000597160587865474
CBX1	2522.46641232552	0.293793954322266	0.0883675330563194	21.3750410895651	0.0296872964072181	0.0788351916421479
CBX2	569.065866101889	1.72412445502858	0.318490903024602	49.8448039096883	6.67459531308069e-07	7.37720356353609e-06
CBX3	4337.80123852883	0.512464373335248	0.159850189280624	22.5132762490778	0.0206850876586305	0.0582751441881635
CBX4	811.351243603796	0.361912924910839	0.133655505240642	18.4308680031201	0.072106502760775	0.160805082913874
CBX5	4827.90599764948	0.457185551390154	0.17060760753791	15.5193638884077	0.159932842657693	0.299348522685541
CBX6	754.199281950041	0.831907105022941	0.180094665337932	30.1913671850675	0.00147854832031138	0.00623509211091546
CBX7	1108.15947557832	0.977057382302689	0.182989864065507	66.5775056209011	5.43564185483691e-10	1.36391964798392e-08
CBX8	421.300292158294	0.374595464808019	0.141322813268302	12.8107586925345	0.305873928959216	0.483908992614717
CBY1	167.083025781737	0.347386096962692	0.241850076683532	3.01215430397826	0.99056428357012	0.99999999313501
CC2D1A	1087.75089790635	0.445496949026314	0.167473260072104	12.1913092113288	0.349436338191857	0.532069689999983
CC2D1B	2308.31199837126	0.24975824963412	0.104188570627279	8.40419348960006	0.676704245648616	0.825857894946939
CC2D2A	413.823452006007	0.564885829590967	0.155594118309489	31.4580809124478	0.000931288615003575	0.00421313906562152
CC2D2B	7.95147861656254	2.03479058241386	1.00931074069638	16.5778636527094	0.12099717926148	0.241838326052928
CCAR1	3717.00749041904	0.714486798353522	0.179356922711155	18.2165005063015	0.0766910873342276	0.168824289161734
CCAR2	4579.77143592728	0.476739188922916	0.130479267804882	19.867507751591	0.0471911368908258	0.114671275592529
CCBE1	101.516218208458	1.6309265255753	0.486489593505289	24.4117430324577	0.0111047001774277	0.0348203643812584
CCDC102A	516.812020232629	0.786072975335509	0.19516948275871	30.513056439638	0.00131558314289348	0.00565195836805134
CCDC103	18.6539820623351	0.815197230396139	0.507154623360029	9.10040235329464	0.612625143558465	0.777218487442357
CCDC106	581.158567162895	0.914121416944315	0.197462114939401	21.3913903517764	0.0295355917003195	0.0785646749358368
CCDC107	293.64917788118	1.10333393183666	0.209276793426929	56.2465840624153	4.57815537166684e-08	7.01484810522549e-07
CCDC110	2.09675494372611	0.701482889795658	1.3194475478973	4.71093162400857	0.944353844836825	0.98974177475252
CCDC112	411.056907108112	0.413554179917182	0.176529852044866	17.1235042866456	0.104275065201862	0.215668064950967
CCDC114	122.677176276302	1.25593928700462	0.3251655264055	33.9350411113615	0.000370643755123675	0.00188970081505858
CCDC115	656.77034393179	0.815709350886981	0.189524803983308	43.8445909581229	7.73632243430322e-06	6.4227095479512e-05
CCDC117	1480.93805630805	0.554512987081808	0.136301256052584	26.7765450851945	0.00496598089673252	0.0176248459306942
CCDC12	1559.95624620364	0.299134077134687	0.0922910694977846	28.3506545079804	0.00285992985159476	0.011074514727087
CCDC120	1397.39023074975	0.347063615991695	0.154494859347845	9.29539731440877	0.594646140875437	0.762047535686849
CCDC121	40.0565959212748	0.979812854524659	0.384532835678652	9.76782489390939	0.551384603753782	0.725233264640966
CCDC124	1190.71861211136	0.406815684272344	0.173047842307325	13.7388946410512	0.247779697840802	0.415592535735813
CCDC125	447.804290250948	0.754806275504548	0.185206114182495	15.6829377300203	0.153315816792602	0.289953106115462
CCDC126	193.197119727846	0.531864770062924	0.213499493014315	9.90253603021262	0.539174895997875	0.714537949188449
CCDC127	628.960577346673	0.24467674761919	0.123995125793852	7.06478076268922	0.793813410580879	0.904822447801897
CCDC129	286.337774384734	1.76126025982991	0.303930937308312	50.0132599067493	6.22513877516339e-07	6.96061715764524e-06
CCDC130	270.875650596762	0.325561933638409	0.190453342049888	5.53750459301483	0.902375470658833	0.969300745047962
CCDC134	362.744656992426	0.609385155219893	0.183428022926682	16.4678746163161	0.124630673953191	0.24740723640225
CCDC136	104.716391179207	0.310334580565878	0.338830379964621	3.81213642122719	0.975093584130994	0.99999999313501
CCDC137	520.312863230018	0.50723287263059	0.184502621976086	10.1491330788489	0.517024584563709	0.695429129130452
CCDC138	604.383610683696	0.65054382391089	0.221438450631735	14.4310991739111	0.210049813823363	0.367641912676072
CCDC14	241.315180898478	0.732204771084834	0.378963722382796	6.6654053305873	0.825496445259828	0.924000215295832
CCDC141	22.8371079997521	1.99722456941362	0.676104392667992	23.1695674574365	0.0167266378103985	0.0489648445796482
CCDC142	244.708831394299	0.470824780836446	0.227313849280857	5.51873511475418	0.903472233430182	0.969765239683329
CCDC146	107.332018594269	1.47350687974827	0.337904431932679	39.909021571971	3.7079711797598e-05	0.000253949392593407
CCDC148	8.17751561614212	2.41296233659948	0.842102106787568	12.760053587774	0.309297106232963	0.487715400961651
CCDC149	456.11457835114	0.372923104973165	0.180666246427484	7.63797138619947	0.745319739011623	0.871992069524166
CCDC15	179.346515619642	0.714259257899753	0.283678838946812	3.11885255960874	0.989060025178321	0.99999999313501
CCDC150	24.0834716478176	1.24701527695148	0.487267939525675	8.69716578645432	0.64982255000676	0.805492129196321
CCDC151	18.9174970988097	1.18681574322857	0.519397277723167	20.3783158372399	0.0404144407295749	0.101206881215536
CCDC152	0.654472961025956	0.983668248766676	3.32415175103019	4.94508705561589	0.933796766841558	NA
CCDC153	5.63917682607616	2.72699832938828	1.21345932769403	17.7460909432761	0.0876622843868092	0.18772530216918
CCDC154	125.24103007035	0.814501877222231	0.363383667738171	9.876875542547	0.541495203191366	0.716764344311052
CCDC155	648.854990257032	1.38593295436311	0.315324187146734	39.779112821239	3.90240364196305e-05	0.000265640307371329
CCDC157	66.2693546870245	0.987402158675147	0.330048652023054	19.6204318334798	0.0508259683602326	0.121799766471257
CCDC158	104.860781406438	0.760950093872258	0.446272209348426	6.19695892691487	0.859904478907947	0.94557167272642
CCDC159	77.1687335246818	0.937570082122534	0.339325015750563	6.93995172524995	0.803925267765125	0.911498748144016
CCDC160	27.0346636393793	3.52133447300714	0.751616128141519	51.8820761273694	2.86385676274039e-07	3.52067418623893e-06
CCDC167	587.967169479064	0.400305340419102	0.178388436895313	13.5372528007457	0.259664198855786	0.429836833942264
CCDC169	0	-9.96578428466209	NA	NA	NA	NA
CCDC17	142.203298004828	0.957981076809017	0.258514559766675	24.4229218373458	0.0110633612271556	0.0347274755204795
CCDC171	80.855271552325	0.823051401012354	0.336781765362936	8.69500170878018	0.650021790319661	0.80563997374367
CCDC173	37.2679403816839	1.07253176437058	0.474845878725251	9.11683604409353	0.611108658858047	0.776092779604373
CCDC174	646.751870459831	0.337222056589035	0.115292838103295	17.6305601293353	0.0905583363371815	0.19272368648184
CCDC175	1.74730971101305	1.49559997733846	1.41222218304294	7.16880814017972	0.785252902147532	0.899242802658089
CCDC178	0.108567284716581	-9.96578428466209	7.25997055193951	-0.0744065920827808	1	NA
CCDC18	896.317528594072	0.681120588757024	0.208040002539164	17.8967750718604	0.0840069096427051	0.181425518191853
CCDC180	6.88181983826657	1.93041695929801	0.846957694499976	7.20666686821031	0.782108703339979	0.897165286854383
CCDC183	239.105056239893	1.07024147746389	0.300882589191526	22.6088305067206	0.0200587789538264	0.0568364979806847
CCDC184	78.2655547906949	2.43163258948978	0.499538215272727	39.5105046959202	4.33678012470096e-05	0.000290831644625042
CCDC186	2797.32300352366	0.45304796800082	0.165087543582636	24.5023664645375	0.0107737449650231	0.0339612308041693
CCDC187	391.139662815983	1.05778618015662	0.309842140766263	20.5690010483438	0.0381213514550711	0.0965565192291925
CCDC189	113.505879769234	0.71888909827518	0.257486962328716	14.5757234045995	0.202755829371141	0.358204928189314
CCDC190	81.9747848321835	2.55422612468562	0.494835788236294	41.5910477804541	1.90607207299392e-05	0.000141717513648541
CCDC191	141.155219799428	0.539987166236313	0.185998030083815	10.2972160041266	0.503867204445669	0.684089169304097
CCDC22	429.888897151472	0.42986976207056	0.171189627019652	9.36272657501399	0.588449323175711	0.757883876290421
CCDC24	123.904040596689	1.04476413993105	0.361611343496522	6.97270542383563	0.801289543016363	0.909844068877808
CCDC25	2145.1876613475	0.181567791942218	0.0937660263311231	13.4512628284454	0.264856455274996	0.435853701187186
CCDC28A	350.068606299927	0.410254487544849	0.193753398881101	5.94265463477404	0.877162949713397	0.954812796895417
CCDC28B	342.902339704548	0.500943093958673	0.198589855375791	15.6944998875247	0.15285672571009	0.289220599711955
CCDC3	3943.34748270206	1.07977561902324	0.188073889538664	71.2630842234566	7.02378898314925e-11	2.13457502596492e-09
CCDC34	382.864757909485	0.835299022405205	0.211178706561126	24.403000081689	0.0111371332117334	0.0349046659018847
CCDC36	44.934614955341	2.34255705939306	0.374637754277777	63.1611364607086	2.38546406897231e-09	5.09952807224943e-08
CCDC38	20.809218985675	1.97207077595484	0.484387770917707	22.786178645913	0.0189430652952864	0.0542549854491436
CCDC39	286.084487089712	1.543629318212	0.339092956689656	32.7172360292216	0.000584621562022181	0.00281470486336558
CCDC40	11.3974892173025	1.15422406760748	0.771744065950716	7.14882642161783	0.786906305862578	0.900362019126921
CCDC42	0.348529292705715	-0.00990848823820228	3.82167460280973	1.43075842163034	0.999698110104303	NA
CCDC43	500.318225381034	0.49240415624602	0.157927540949587	18.5071343797465	0.0705349839302205	0.158210997574308
CCDC47	2581.19183644353	0.249432723395422	0.122258337233719	9.76678358160319	0.551479249763916	0.725310404927751
CCDC50	476.988973588338	0.356653248193221	0.186376556323163	3.83974919691281	0.974372276384766	0.99999999313501
CCDC51	379.390742934025	0.518352757326192	0.168480129889467	17.150233118677	0.103509597934512	0.214459114527761
CCDC53	702.674357746727	0.411153892805823	0.159684939138208	12.1179562851256	0.354842483242446	0.537734746905238
CCDC54	0.080828484731005	-9.96578428466209	7.25997055193951	-0.320428218155982	1	NA
CCDC57	257.498303648694	0.289877484604198	0.216855183510348	5.14656050847134	0.923861336438536	0.98009415080068
CCDC58	448.929089003687	0.755923428496767	0.178750972172636	23.8603100575413	0.0133351563707818	0.0404105979417781
CCDC59	615.682353653038	0.425800803003405	0.181699640252435	7.15484488022634	0.786408750999356	0.899946039864033
CCDC6	2546.09419073269	0.516993941971326	0.126717619327403	14.2575062607061	0.219070695267674	0.378888878879688
CCDC61	699.009911358474	0.480559238357867	0.178222258862633	18.4317764269359	0.0720876028299272	0.160780729402281
CCDC62	219.245150899453	2.15067100535964	0.285012935278398	68.6747902658172	2.18032982095638e-10	5.94471793808525e-09
CCDC65	10.1024510148561	1.05743050888281	0.704370124541416	9.31388906195335	0.59294348432791	0.760753156687118
CCDC66	409.927283339303	0.93363965171425	0.211550389691257	23.0035850054255	0.0176545656037667	0.0512567496181981
CCDC68	63.9684536351279	1.21480673760364	0.330541444446793	32.3449285978307	0.000671318922126471	0.00316777633768765
CCDC69	86.2606909529079	1.48630601562584	0.360205069816942	33.5849217400133	0.000422752061573326	0.00211838629411613
CCDC7	14.3955301496434	2.77739076597814	1.06561807531345	2.76399130400711	0.993491539112045	0.99999999313501
CCDC71	491.97659286163	0.655549922147518	0.145417360540472	24.884571528509	0.00947799003702996	0.0304775009984227
CCDC71L	737.827654277123	0.384893311053653	0.14540058415517	11.6372612398653	0.391517172092651	0.575521959618795
CCDC73	246.292446119876	0.525854852081936	0.277709580635182	7.09342857933814	0.791467760745485	0.903046222553609
CCDC74B	13.9066135764934	1.41597594315909	0.726647218354886	7.93583487030784	0.719039877826373	0.855149008282587
CCDC77	480.367898345482	0.881679323709316	0.153180277616979	48.6049455392906	1.11333869305466e-06	1.16111083469764e-05
CCDC78	98.2356458274827	2.24093686299181	0.987607306279598	3.62223843210444	0.979695128836654	0.99999999313501
CCDC8	1313.26546220006	0.985200225714301	0.213777183384719	35.5095448360819	0.000204119634139072	0.00112494707556569
CCDC80	7548.69496677	4.51361400766943	0.654427005600064	88.4982158500724	3.28076934987527e-14	1.91052663672361e-12
CCDC82	1178.88695073483	0.787449752936238	0.190865283025401	30.7219500888541	0.00121923225384953	0.00529788886840934
CCDC84	303.970973330217	0.725695361859478	0.195123846431038	17.5475959110406	0.0926891661877863	0.196382125080726
CCDC85A	136.114461495208	0.556981228979986	0.218022525691083	10.1265009688776	0.519045527018246	0.697402528933758
CCDC85B	493.623469426572	0.693158938648648	0.186159520159119	21.7277854539794	0.0265689928346761	0.0718961370703585
CCDC85C	1701.48611573785	1.31707432356553	0.227485534098894	50.6781180946813	4.72564829136361e-07	5.44720179763646e-06
CCDC86	536.664026612439	0.53966029581807	0.165240212934099	25.021290559024	0.00905148293811392	0.029316561601038
CCDC87	0.922310581396662	1.01572738403159	2.48168900364365	8.46577770781927	0.671071902184008	NA
CCDC88A	723.539365018266	0.590683059242608	0.233741788419263	16.6584125187871	0.118393546405006	0.237742831025957
CCDC88B	90.4435154648355	2.20601690157939	0.414008519570919	49.1217050713562	8.99813721989624e-07	9.59277602347562e-06
CCDC88C	574.769029804025	0.442778450552421	0.170706393177914	14.4817925927139	0.207470346309826	0.364329789767882
CCDC89	87.9233283547337	1.65943794809784	1.43819951043805	1.98649080131963	0.998542796535465	0.99999999313501
CCDC9	1171.49518169728	0.452866786957322	0.185036175359527	12.1066834743215	0.355677848852574	0.538474188634045
CCDC90B	999.351256127175	0.412333932841285	0.183200229140035	2.76367096253853	0.993494833197691	0.99999999313501
CCDC91	815.66906495345	0.406626408639715	0.202578851518798	7.25893551599478	0.777743418780068	0.894081823955304
CCDC92	297.073879921126	1.14169133674982	0.238176117683708	30.7244751135388	0.00121811053797143	0.00529529864715995
CCDC93	916.042525201075	0.48334937617905	0.0971375239660779	59.6093759596281	1.0957229115976e-08	1.9889838689892e-07
CCDC94	421.720788904991	0.607916352111491	0.16464861203899	12.8356859499997	0.304200479405272	0.481790242063891
CCDC96	58.0067250470627	1.4370618551479	0.394672952969538	23.6134422380858	0.0144650799312332	0.0433135526132291
CCDC97	1030.7874906237	0.411055803043332	0.144871604184677	11.9227433204537	0.369478318211167	0.552968776174464
CCER2	283.538159437772	1.09793282009245	0.273114038200467	24.8323751417835	0.00964579681366102	0.0309036232319716
CCHCR1	655.395970659307	0.705515772237065	0.221566084379061	14.2547997386405	0.21921365578299	0.379103591998238
CCIN	6.33171204162147	2.39796119366722	0.9786783019691	13.554812716763	0.258613032094742	0.42869551490555
CCK	10.1179779985938	2.85570890782842	0.966600031791181	16.9538106883759	0.109249300771856	0.223660248044313
CCL16	9.59885078020332	3.358776715251	1.22757466831783	12.7034022200002	0.313152083076779	0.491984508531308
CCL17	0.621530084245932	0.137648252956717	4.06491791372097	3.35112292084011	0.985224848946896	NA
CCL19	43.0072580634876	4.6286044723027	0.870582879888345	27.281210899969	0.00416624603859158	0.0151990218263814
CCL20	86.8781556797912	3.65542072479861	0.67789486428715	66.9693845315288	4.58412166224726e-10	1.17051099100802e-08
CCL21	739.984858309642	2.06837589804779	0.478381643753094	28.8179720999829	0.00242230454119215	0.00960578905736679
CCL22	20.7991885213668	4.15197702321453	1.08742642724781	28.3039159096284	0.00290767055261324	0.0112299509228683
CCL24	180.127490049458	1.65410236106209	0.542171308047261	19.5711251904433	0.0515809710584657	0.123245695513296
CCL25	42.9135649555479	1.90471886420798	0.323587725264503	43.6946759848898	8.21739370181614e-06	6.77378886005112e-05
CCL26	1706.31694193436	1.93763279695152	0.434603224816136	63.3720754113926	2.17802110471611e-09	4.71374299021751e-08
CCL27	1938.29623227248	1.6811241413575	0.339588854479419	52.0795909480833	2.63739367791505e-07	3.27221953302403e-06
CCL28	7.2558769331507	2.93220287060507	1.18650100461682	23.0153655913022	0.0175871467289597	0.051097825442222
CCL5	27.3099212187231	3.56259222583294	0.634954105964739	41.0027331138782	2.40743346671941e-05	0.000173426445909651
CCM2	679.871582689688	0.415959921577878	0.127003848745943	14.8114533123276	0.191292442096544	0.342122440600325
CCM2L	169.780697507223	1.34404121291848	0.267864418120038	45.2969928815727	4.30200198350354e-06	3.82697739362529e-05
CCNA2	656.263754377932	0.860880190177914	0.16066028155418	46.6261705664363	2.50521872264254e-06	2.38091422448326e-05
CCNB1	783.231827329543	1.12598919231836	0.2649100168372	61.5673986193398	4.73620502241153e-09	9.47664299866632e-08
CCNB1IP1	131.007413563864	0.836854874804475	0.253961929301029	9.48985121853951	0.576772248039169	0.747836809893258
CCNB2	280.58486329302	1.21522519812379	0.222717196175588	55.5422742466945	6.16540327710102e-08	9.15451073178397e-07
CCNB3	278.969186010363	0.723605153931219	0.211590971973877	24.2847390417866	0.0115847355125875	0.0360410202350571
CCNC	1624.6353106789	0.470736929318564	0.196029449624252	11.5335601833832	0.399704059552805	0.58402009397603
CCND1	6082.85358430969	0.484860911697777	0.119597437333009	27.6198489268213	0.00370054480295146	0.0137746678800423
CCND2	7775.36617822932	0.821766935187207	0.178985622270468	36.1239007461807	0.000161391412650974	0.000914218603740363
CCND3	1077.26802074968	0.985484640945006	0.203632490484949	53.9629577655638	1.19887366924284e-07	1.62996663708326e-06
CCNDBP1	1619.568434593	0.418524843216225	0.102119750701198	28.0331851557896	0.00319966801730276	0.0121940818764202
CCNE1	75.2539856633569	0.712186405345456	0.296725278156555	9.06430261334663	0.615956843252087	0.779775976042115
CCNE2	211.713570668624	1.02537589568169	0.286578984672701	22.2237476950163	0.0226960212149594	0.0629979517096318
CCNF	306.587974902254	1.17640991325114	0.280138679070702	37.2640810127683	0.000104059586130645	0.00062346018464061
CCNG1	4260.33255126157	0.781833785942206	0.224597409716569	16.169102890904	0.134968198952306	0.263208888955672
CCNG2	999.910628898268	0.327656313482258	0.137525951465586	12.7568684882874	0.309512994459023	0.487903092266849
CCNH	517.254472337802	0.486842773040794	0.162072006152869	16.8469019357931	0.112486468409375	0.228650776648177
CCNI	5597.84382083042	0.476390394059031	0.135106478183158	25.7844494523537	0.00698645029865884	0.0235637741994772
CCNJ	453.887334744716	1.08865005453488	0.26224171197907	41.636219071903	1.87213916956762e-05	0.000139451874778625
CCNK	512.963871189102	0.452171265584908	0.120079056948883	25.0678828170993	0.00891034451044908	0.0289385124985555
CCNL1	2121.26864183963	0.460729132053426	0.13839616299846	14.2110010617095	0.221537060914713	0.382137680024874
CCNL2	4015.88024699146	0.230009057899699	0.134849642465051	10.2807949860073	0.505320417498986	0.685175039851082
CCNT1	1554.69332202949	0.365631097698446	0.130551569810924	13.4170843301986	0.26694088306484	0.438353044243966
CCNT2	2863.70280742658	0.682712949585738	0.137651993684947	22.5528291418218	0.0204236556658788	0.0576514763255523
CCNY	2846.52028402527	0.444064670800683	0.105659600010092	36.5337654842465	0.000137897028893014	0.000798645367969344
[truncated: 20,405 more rows]
