# Supplementary material for: Time-course RNA-seq analysis reveals stage-specific and melatonin-triggered gene expression patterns during the hair follicle growth cycle in Capra hircus
Source: BMC Genomics. 2022 Feb 16;23:140. doi: 10.1186/s12864-022-08331-z (PMC8848980; doi:10.1186/s12864-022-08331-z)
Supplement: Supplementary file 4 — Additional file 4. Differentially expressed genes in the melatonin-treated group. [file 12864_2022_8331_MOESM4_ESM.csv]

	baseMean	log2FoldChange	lfcSE	stat	pvalue	padj
A1BG	62.5747558239035	0.673461292347125	0.302195792639647	10.581323076121	0.478974972003427	0.999999965386961
A2ML1	11.6165416376216	3.31175154992383	0.641683835704431	47.0651965406081	2.09394360203518e-06	0.000100011218934098
A3GALT2	47.7172072351318	0.57791941973079	0.409574632757085	9.06473999273152	0.61591647381367	0.999999965386961
A4GALT	83.7051548153236	1.2601174338744	0.419853287788783	14.3554742261674	0.213943869236233	0.724236617724169
AAAS	577.182051894068	0.503145587005939	0.16794643225153	17.7134626741573	0.0884718755823867	0.435891228770708
AACS	1488.8176995587	0.511121772400635	0.129224115560635	37.7526265605387	8.61232582304953e-05	0.00241415024994257
AADACL3	413.397016751832	2.64403119910166	0.606663325535736	30.5626095838879	0.00129208029046539	0.0218808571048003
AADAT	465.792331573856	0.779687329898876	0.183413051558292	27.2669849404049	0.0041869923972923	0.0539565398781387
AAED1	552.057378006307	0.76277344874311	0.237452210719103	13.1547167993516	0.283333633604722	0.832900992242862
AAGAB	1052.99406009564	0.330102580962442	0.124306422773994	12.1147780184256	0.35507788451545	0.914874416748546
AAK1	479.308505338005	1.32296082257997	0.405941960329944	8.19739066500858	0.695520335018998	0.999999965386961
AAMDC	579.092931131683	0.643210417354611	0.257796071815541	12.7370009513119	0.31086191530532	0.867556484098437
AAMP	1987.36945784768	0.227914212576008	0.12485765711285	4.81890513209743	0.939618451733355	0.999999965386961
AANAT	1.9305938114771	1.81765421749866	1.47580731495041	14.5463698329882	0.204220078632155	NA
AAR2	530.810115713503	0.443116411767875	0.137398224853717	13.4778740498295	0.263241668500046	0.800876554227568
AARD	40.7886607855307	1.43565623244786	0.549686444572697	37.8511810896832	8.2891698343411e-05	0.00234388694305253
AARS	2745.01017636336	0.59467403609792	0.115063796592931	29.3558401331258	0.00199842002255862	0.0308430660422813
AARS2	251.693112496686	0.314035010021376	0.192481417360346	5.29505955142633	0.916039219170531	0.999999965386961
AASDH	588.690969699744	0.215233296823447	0.178875054341301	4.07469633447727	0.967680766895418	0.999999965386961
AASDHPPT	1992.82478924552	0.43982236173991	0.214950291250011	4.20931800163771	0.963388928495269	0.999999965386961
AASS	1676.32652206778	0.46128875499541	0.187636895686204	11.9266394623298	0.36918271350167	0.927910701694748
AATF	572.551118183374	0.239294120278659	0.207456637865752	5.13833669774652	0.924282206099957	0.999999965386961
AATK	559.669782383462	0.622574739189935	0.265291248850158	7.91515931559104	0.720883001093805	0.999999965386961
ABAT	59.9005131177443	1.39853204320184	0.381797092309463	14.4068574294903	0.211292055548666	0.719467912975713
ABCA1	3693.9047412371	0.575540658756422	0.278920662603373	11.4532630765284	0.406107793100612	0.96467758964677
ABCA10	1908.53490621449	1.61486025742226	0.219997554132365	98.3999959394796	3.70189184418139e-16	1.27799697736494e-13
ABCA12	2464.52163545771	0.768471828595178	0.226346304891855	13.5570891795096	0.258476985897304	0.792457013584814
ABCA13	6.16655876232664	2.37431416335956	1.18238068893874	9.65770176629098	0.561414339530175	0.999999965386961
ABCA2	516.842570469619	0.774501804720137	0.269952958946771	8.64397647426557	0.654717222764682	0.999999965386961
ABCA3	225.11382423866	0.659106099363009	0.234394935577538	5.85280310543413	0.883002790396125	0.999999965386961
ABCA5	1839.88337472822	0.513216285366505	0.201803094045072	13.445488757211	0.265207770491412	0.803570625502917
ABCA6	1387.51617126171	1.13675185674927	0.429670436158427	16.0187570151439	0.140435960069245	0.571974127068279
ABCA7	130.115061004201	0.998522158644599	0.314414069905719	16.8614577669781	0.112040954703304	0.50336573211224
ABCB1	225.362673495323	0.676746255893175	0.300430207093512	4.6825175004401	0.945562242122793	0.999999965386961
ABCB10	917.837586996331	0.356323122097931	0.167582561225916	5.70018450258959	0.892601247229166	0.999999965386961
ABCB6	830.452092637574	0.44319330512411	0.137970537920432	14.9374787676315	0.185377113666419	0.672290977281201
ABCB7	826.543595227244	0.30122950880372	0.151972116335801	6.25737575538784	0.855651169296818	0.999999965386961
ABCB8	947.182309290572	0.591966649617129	0.212274690966602	13.4706488306142	0.263679395117508	0.801341025038197
ABCB9	321.518267573605	0.63671963740854	0.180266458160875	17.9231954272159	0.0833799462836053	0.419844059101532
ABCC1	1076.45370120789	0.460207356616646	0.151698473633324	18.1408823691794	0.0783686876865901	0.403807027048107
ABCC10	356.83322804325	0.49777068315695	0.308426489111844	5.50123548133854	0.904488963851015	0.999999965386961
ABCC11	2502.13957930278	4.58599981976169	0.682245634134119	60.4749132624455	7.5667556002836e-09	7.02351965577267e-07
ABCC3	933.7399137321	0.38533454352472	0.127338445649497	22.4882235132599	0.020852291036003	0.171686771132413
ABCC4	1003.63044645606	1.65086847923465	0.273476494986925	49.6501584158974	7.23406685778306e-07	3.90005390760151e-05
ABCC5	1064.39509980475	0.738094774942617	0.16595482330437	21.0828876307326	0.0325224107740402	0.232464947043793
ABCC8	69.5264633473652	1.16486964052536	0.316002107959158	31.0137538286062	0.00109601682488755	0.0191787345133086
ABCC9	366.365069966119	1.03628393406581	0.291456309877149	18.4282386631422	0.0721612314432864	0.386506583557784
ABCD1	381.381390820339	0.831070349461369	0.196777573581609	30.52378352338	0.00131046044571689	0.0221539868134166
ABCD3	2283.05165932666	0.84933799560753	0.20316567391688	6.59876512068467	0.83058383942773	0.999999965386961
ABCD4	543.234943767212	0.462402336013889	0.175490622049986	9.46403521575462	0.579140794132714	0.999999965386961
ABCE1	2959.57848580843	0.565774740550985	0.247700397744503	5.35279258185562	0.912885170144083	0.999999965386961
ABCF2	870.139089549195	0.568300721808725	0.153514121056112	8.4489874640376	0.672608639179165	0.999999965386961
ABCF3	1416.29172791803	0.172931305194931	0.112061437053982	4.58110497496654	0.949746958259623	0.999999965386961
ABCG1	924.20644469467	0.654307201647033	0.321529655041716	13.1215762796919	0.285453598800265	0.835520849490857
ABCG2	321.010187264063	1.24769476690888	0.260261932158977	33.6260638049397	0.000416276543864037	0.00877973186511953
ABCG5	6.50954034130342	1.24398304385198	1.00776994687842	3.57547207292993	0.980734279626081	0.999999965386961
ABCG8	25.5218986749997	1.99841613018279	0.609629784250783	20.6088861063124	0.0376570378032701	0.254819528848951
ABHD1	137.817880837554	0.703472778181503	0.260081239333098	9.33969723563058	0.590568049807047	0.999999965386961
ABHD11	494.159297010058	0.567135003708029	0.237940444061578	7.31583683845344	0.772960051924891	0.999999965386961
ABHD12	2324.43120071079	0.289656623659064	0.185939205370002	3.35956810269261	0.985070216277019	0.999999965386961
ABHD12B	286.236482381888	0.569115571138996	0.243498239633414	13.030450938642	0.29133981187652	0.842869019326384
ABHD13	1593.14528220266	0.410568113564567	0.187163433143088	6.00170516801143	0.873250455088292	0.999999965386961
ABHD14A	150.159212531775	0.5658478109386	0.294764145220515	12.1217414950267	0.354562253713496	0.914725203500711
ABHD14B	1799.89269596558	0.50038011372554	0.132983450524383	20.7127720180579	0.036471893508649	0.249421152546377
ABHD15	67.013579002454	1.42232786300907	0.549258020492843	9.78279814223299	0.550024099504166	0.999999965386961
ABHD16A	1067.99245807809	0.321925222056901	0.128716583725628	12.360382500059	0.337172896217857	0.898427657654027
ABHD17A	1156.85246622033	0.324504648486337	0.207562541562268	3.3135896961773	0.985898867272668	0.999999965386961
ABHD17B	1040.63869830184	0.564855166044547	0.252388411451197	4.12316376047079	0.966174583170154	0.999999965386961
ABHD17C	700.388424375332	0.460603492970727	0.18638381465151	6.65373096959092	0.826392040251302	0.999999965386961
ABHD18	386.924599522082	0.731691090149622	0.264887847568206	3.81565994943168	0.975002290705379	0.999999965386961
ABHD2	809.406943684568	0.713650212592746	0.296878192993203	6.35467179141227	0.848682876540036	0.999999965386961
ABHD3	469.192597734608	0.639843262432558	0.220887206551359	10.1749348648798	0.514723763775526	0.999999965386961
ABHD4	780.843062023906	0.453480821686702	0.181402369788658	6.08665235366868	0.867520383005149	0.999999965386961
ABHD5	4249.30957043427	0.675636079488919	0.186975120584788	18.1033706353779	0.0792128347201303	0.406128105289071
ABHD6	296.122308597475	0.476353539555432	0.160818144472798	20.7685379093671	0.0358499142189328	0.247094435026325
ABHD8	297.746650331112	0.491496315127958	0.224429563315863	8.51601215742943	0.666469407562645	0.999999965386961
ABI1	2948.39281963466	0.245671096627215	0.14561876512935	3.62756697206873	0.979574407909179	0.999999965386961
ABI2	60.6715170462005	0.657352653197523	0.441290660243551	3.91106722567247	0.972446594290998	0.999999965386961
ABI3	84.7875245224463	0.980538989510695	0.509100536672785	9.67063123429887	0.56023469408335	0.999999965386961
ABI3BP	2965.92969239053	0.712880113589732	0.226387179990088	24.6813497842585	0.0101473450830139	0.10307173806209
ABL1	2082.36056627546	0.496823178288125	0.204240072638077	5.99182644653342	0.873909059502352	0.999999965386961
ABL2	354.642725810503	0.942346146202181	0.486274886305569	7.01748414989862	0.797665835946518	0.999999965386961
ABLIM1	6896.55863748966	0.455171889018038	0.147139331597239	10.6452881163449	0.473440242648422	0.999999965386961
ABLIM2	327.302647571124	0.662123473074854	0.250331748518211	9.74872842112802	0.553120914011493	0.999999965386961
ABLIM3	341.264618208469	0.65802588521989	0.210599607629561	14.8635225325017	0.188830587695033	0.678321364180699
ABR	2964.29260638149	0.326791464809567	0.134928266574216	8.30874484191463	0.68540899162312	0.999999965386961
ABRACL	1106.63693676349	0.772723840276238	0.217923267059382	14.4793692629316	0.207593092922387	0.713540066816897
ABT1	1108.58696895327	0.488086772371518	0.102122511605115	22.6709713564126	0.0196610341646017	0.164284428998315
ABTB1	1549.07044286449	0.640891899431023	0.175987949901521	12.6583478439595	0.316240738488365	0.874014782580625
ABTB2	918.148215123617	0.428364043323824	0.186770121020354	10.6104373807244	0.476452451665688	0.999999965386961
ACAA1	1988.01077480848	0.420748193571991	0.171008505751264	7.39411002275631	0.766328942071298	0.999999965386961
ACAA2	2407.12675554674	0.409155822210439	0.152306488962181	19.5982813463639	0.0511639004644505	0.309976364944414
ACACA	2155.10255188952	0.648001138454733	0.228281013559441	12.4210781379358	0.332838204652636	0.893968632765627
ACACB	123.506395190567	1.03411889114899	0.380622626371829	11.8340856618538	0.376242889431522	0.935756771768642
ACAD11	521.265041386987	0.373140084266058	0.254074469545499	1.52347336125877	0.999589735087821	0.999999965386961
ACAD8	1062.00495548984	0.735041644085462	0.153106771276435	25.1338421987453	0.00871410871443089	0.0921915221949307
ACAD9	2944.29512816128	0.785391273601507	0.125372477733121	49.3617202105545	8.1495702403588e-07	4.33424981594001e-05
ACADL	386.708614542804	1.34257424627401	0.331191747048216	25.2114644216858	0.00848843391170833	0.0907801100622807
ACADS	454.949473491546	0.343264602193938	0.270505270794288	3.60843435927984	0.980005652792696	0.999999965386961
ACADSB	750.778029180643	2.30771106569916	0.368196923854911	148.30438493098	3.30835051742972e-26	4.06885759262388e-23
ACADVL	2971.46323613864	0.33276724692043	0.127072630145373	13.4534538569777	0.264723233039796	0.803025093226007
ACAP1	1087.57333216847	1.04049740236595	0.384455508157772	3.09609843970247	0.989393910505435	0.999999965386961
ACAP2	1092.17405172926	0.60932218188837	0.304676871519364	6.73112155916817	0.820421095903351	0.999999965386961
ACAP3	1084.32350465532	0.509573627784011	0.21033379337758	11.4759734054211	0.404290983401162	0.963317168997761
ACAT1	3798.85988695339	0.651645007381864	0.213445915333912	16.8365648276761	0.112803777123162	0.505408179924767
ACAT2	955.173221582627	0.713463713868143	0.168338143056938	45.0407423951371	4.77277571299018e-06	0.000201975656946711
ACBD3	1924.08278673997	0.127688368441531	0.100271886528736	3.78703933476902	0.975737527307035	0.999999965386961
ACBD4	473.737817992429	0.48751547126605	0.191471190274778	10.707699785352	0.468066220354326	0.999999965386961
ACBD5	1310.67495008716	0.387077566673395	0.139788469221888	6.47850523028558	0.839608402371828	0.999999965386961
ACBD6	348.536143142397	0.338043553498399	0.166844042439656	14.5122449728619	0.205932665231494	0.709816602982192
ACCS	271.632749465269	0.528873578077136	0.277017770401904	5.71437414910804	0.891726141045948	0.999999965386961
ACCSL	6.47022106420646	2.5168323284101	1.09111118965429	6.56105657220618	0.83343549338815	0.999999965386961
ACD	442.733131096921	0.24124529124795	0.166826394972116	9.43956297537272	0.581387439477498	0.999999965386961
ACE2	271.804147092263	1.06848946334583	0.38937948161425	17.5311796039523	0.093115931601526	0.451180751661217
ACER1	1377.98407269839	0.895656667506447	0.207570904854574	42.2109090592725	1.48905584873718e-05	0.000540672658045638
ACER2	253.772663003682	0.970483330822656	0.335447648036837	10.5956125237605	0.477736215225896	0.999999965386961
ACER3	947.197452521971	0.891310787694242	0.293770037336334	6.86140304766741	0.810193699078737	0.999999965386961
ACHE	255.113468462515	1.09651883157351	0.311966022282652	19.5950187550177	0.0512138464659866	0.310183462837084
ACIN1	6063.81737183122	0.511212264064107	0.195885428866369	6.02940460657987	0.871395096636283	0.999999965386961
ACKR1	99.4099825199107	1.38310837534075	0.593958077853044	13.8535260897315	0.241204728684176	0.766763780016701
ACKR3	911.850265472272	0.977733320261334	0.255604118012167	54.8212619077342	8.35601056401214e-08	5.6699853751252e-06
ACKR4	376.107568051411	1.41453046022913	0.409280460602481	33.4211769643503	0.000449512512694478	0.00932087168050783
ACLY	4034.56007072477	0.393853949060607	0.0833317058118114	29.0241315182752	0.00225047204854168	0.0338827765655725
ACMSD	4.16233756926454	1.9660992568682	1.22768269454861	6.57383808319943	0.832471127425801	0.999999965386961
ACO1	1190.01684907639	0.652338436312596	0.184294880452895	15.0944485758662	0.178213737854967	0.657090113080391
ACO2	2216.0804795106	0.23276341228263	0.110336753611693	7.69328940114394	0.740486525588239	0.999999965386961
ACOT11	31.1835537416389	1.72518163276167	0.65984243283746	9.51331699687313	0.574620695109071	0.999999965386961
ACOT12	23.6606083957884	1.87083262542485	0.980899753467312	1.54018695036933	0.999567379638864	0.999999965386961
ACOT6	192.821821363766	0.519042594275673	0.229872791307776	6.42962211916262	0.843217524619209	0.999999965386961
ACOT7	1066.5083313583	0.566196862503393	0.185472732931829	8.94427691513107	0.627035929198968	0.999999965386961
ACOT8	422.855693440789	0.521701982130712	0.214906659185652	6.68731663494924	0.823810584683973	0.999999965386961
ACOT9	826.678442519863	0.238940201803357	0.196381321651351	10.2516741118438	0.50790117905586	0.999999965386961
ACOX1	2873.85205221071	0.409880553660198	0.134779864483215	7.92848311842613	0.719695545754996	0.999999965386961
ACOX2	332.894919396434	1.07607512143318	0.220302596905551	54.9318947555753	7.97551924937929e-08	5.44938429823908e-06
ACOX3	1305.37525192303	0.385169893453352	0.152969400347264	6.52786084592418	0.835929397094078	0.999999965386961
ACOXL	8.08048877732566	2.79944892966034	0.904087777395269	19.6431302738262	0.050481771886476	0.306977845235499
ACP1	1485.58733477323	0.273971812612964	0.14724075282668	6.36724608946963	0.847771812733116	0.999999965386961
ACP2	403.169037872474	0.852754407129475	0.358287231796892	10.5657531773832	0.480326237763066	0.999999965386961
ACP5	1087.82146923964	0.591040788147506	0.282299582536669	10.749153253453	0.464511527877984	0.999999965386961
ACP6	509.599557260729	0.741489998179684	0.186283275720396	46.6544024643096	2.47652171854569e-06	0.000116586110951058
ACP7	1686.82765124413	1.0262766268064	0.227891088773993	27.8474297156123	0.0034161229908279	0.0463923176076683
ACPP	1029.04363340331	0.82490474614998	0.254191542888369	19.9970880121832	0.0453806258216573	0.286661777462906
ACRBP	14.049240545457	2.23952205661817	0.844237226297285	8.10559660149841	0.703814562820871	0.999999965386961
ACRC	511.286259907019	0.792955954362228	0.182705711582028	32.2428049119001	0.00069720967186212	0.0133200892455367
ACSBG1	6270.10237012714	1.16853471688006	0.203668146235919	83.4116750674773	3.21860527923238e-13	6.88431681355813e-11
ACSBG2	38.1134783232433	1.41272435738596	0.532500231473512	11.0040647403072	0.442922808927576	0.99965541342263
ACSF2	1605.0282881418	0.635493549441948	0.134453967687523	32.2644291489308	0.000691647568222197	0.0132267540818758
ACSF3	327.881964411495	0.992496402447439	0.400096958875884	5.16304468158751	0.923013819693945	0.999999965386961
ACSL1	5918.74795955461	0.69200889767852	0.148641922986581	45.6073407690765	3.7929214268078e-06	0.000167347775418663
ACSL3	3315.71420174466	0.435181630816207	0.168430060852509	9.39419096604331	0.58555610048052	0.999999965386961
ACSL4	1556.36369810202	0.449593301340873	0.2089848142061	10.8908770562584	0.452450102696041	0.999999965386961
ACSL5	2623.32474383441	1.00135374576885	0.250648135926852	39.6166717469449	4.15968591582154e-05	0.00129516296600532
ACSM1	101.456273959428	1.95174861954315	0.337440313619581	57.0431313551548	3.26701223770226e-08	2.49179328734516e-06
ACSM3	712.818501382734	1.09233887688411	0.434127362429764	25.6268513969987	0.00737218714503579	0.0820995464855768
ACSM5	129.92425108249	1.91791555218499	0.458977556522574	34.1184449958938	0.000345906866077313	0.0075897528908093
ACSS1	1160.71860340621	1.02500401646673	0.218498985045245	41.7690080609857	1.77579713699101e-05	0.000628491655786133
ACSS2	1472.92237730768	0.976312641987488	0.226166714310153	31.0710698549794	0.00107327700519349	0.018890827288191
ACSS3	1546.66622397531	0.449116376936635	0.234469279450122	2.74810517965722	0.993653467042799	0.999999965386961
ACTA1	19.6180890949152	3.62282656247616	0.903092581110277	25.1561104807163	0.00864879052542802	0.0916976831677654
ACTA2	7585.14114273998	0.753461321570479	0.264359466247664	11.3616346798487	0.413482709856736	0.973034293776711
ACTB	45668.3415643198	0.342356738065066	0.129713082622223	8.80747306985961	0.639658149762941	0.999999965386961
ACTBL2	2916.88952352626	0.924686651360305	0.434117574195946	8.91721319764281	0.62953381699244	0.999999965386961
ACTC1	18.3901899460005	4.70323961885133	1.32909808586942	25.2863752016411	0.00827591787260008	0.0891371165282017
ACTG1	58727.2241983138	0.378349008329197	0.157808623823727	5.64800367670659	0.895788430769501	0.999999965386961
ACTG2	2397.33342961383	1.89503055962999	0.419762585623923	28.6048775678659	0.00261319427146045	0.0380447227987811
ACTL10	2.60857926442171	1.64539671589984	1.49789271298493	5.87798984718424	0.881379735962184	0.999999965386961
ACTL6A	641.233858182281	0.459510230450671	0.142664218949052	17.209999225753	0.101815500008583	0.475783759004725
ACTL7A	0.113930825971858	-9.96578428466209	7.2599705518811	0.0994849732872893	0.99999999977379	NA
ACTL7B	0.0524093953986055	-9.96578428466209	7.25997055193951	-0.761350258220656	1	NA
ACTN1	6369.84866927534	0.380028157862042	0.131611266207536	7.44054154956552	0.762368444589514	0.999999965386961
ACTN3	33.2236548673475	1.31526965720564	0.510958124426537	6.09215189568181	0.867145328988616	0.999999965386961
ACTN4	10598.6431324884	0.504542735882025	0.161908302234079	12.445355525055	0.331114482960312	0.89171613554064
ACTR10	1594.77876359001	0.463728093624645	0.194785168838316	4.35806336071954	0.958249265051036	0.999999965386961
ACTR1A	4406.33087913261	0.24229376125164	0.102639238669964	5.77321789909695	0.888059054442207	0.999999965386961
ACTR1B	951.600167759675	0.264694592479227	0.134305268274321	6.15339899159852	0.862935319681564	0.999999965386961
ACTR2	6397.02464599329	0.250957841677172	0.114416631996954	4.68788559781069	0.945335152490014	0.999999965386961
ACTR3	3629.59610341422	0.364427294115167	0.17814515735446	7.24142398640504	0.77920901689958	0.999999965386961
ACTR3B	245.843183670267	0.568210741401755	0.190049140675804	18.8628151740641	0.0636009094230443	0.356563730947768
ACTR5	432.399209892936	0.22609769292658	0.127417753406037	7.0206724174713	0.797406943183544	0.999999965386961
ACTR6	763.917712180368	0.693551245353968	0.291548831151444	4.62077253425235	0.948133929651775	0.999999965386961
ACTR8	589.491349851146	0.432724922124755	0.123541385681912	14.6649346543191	0.198355925198448	0.695890157970236
ACTRT3	23.2893251853153	1.13619806328027	0.535564926839299	6.43000380329056	0.84318947940624	0.999999965386961
ACVR1	1519.38152736225	0.708153071314955	0.158335874912333	23.3822124349662	0.0156046540185357	0.140277926805274
ACVR1B	2413.71960301417	0.433122507457691	0.166443972594603	12.4833631310808	0.328427517370159	0.889090203165495
ACVR2A	1312.05542171004	0.394000718343177	0.189657956056078	10.859336374345	0.45512187989527	0.999999965386961
ACVR2B	826.040110819984	0.498481924087902	0.281012821239431	7.04482778442059	0.795441718559443	0.999999965386961
ACVRL1	843.502684609461	0.611003702502886	0.266576603135236	11.5012986431841	0.402270226680173	0.961177561561153
ACY1	342.100832424386	1.55156467044022	0.230758452004034	58.6687327388431	1.63686092693203e-08	1.37650210769951e-06
ACYP1	276.49980159635	0.647741416622324	0.209609490338009	20.7654115463575	0.0358845245666864	0.24724638460198
ACYP2	208.156305328686	0.650733212892599	0.356565746530234	7.43123047731206	0.763164224495572	0.999999965386961
ADA	204.205101054284	0.695793715966794	0.309161507369629	9.83299929949919	0.545468729477611	0.999999965386961
ADAL	504.725531779101	0.438215633887815	0.263475275080796	2.6763836724225	0.994348842092515	0.999999965386961
ADAM10	2736.15411381773	0.35559095137149	0.142838295859751	8.69609992910716	0.649920681322256	0.999999965386961
ADAM11	60.1291135579724	1.28585258446323	0.335125878078674	26.6403232161634	0.0052058724811885	0.0634599508314313
ADAM12	565.169707858137	1.28117728875009	0.410030153797337	9.57926033544811	0.56858189500622	0.999999965386961
ADAM15	1257.22093867618	0.472739716939751	0.156746139945315	9.97018517525959	0.533071005443203	0.999999965386961
ADAM17	1965.33938826925	0.195297723461832	0.116773867978732	10.1602001594856	0.516037285062262	0.999999965386961
ADAM19	429.623401832536	0.930637896723057	0.411605136980404	5.55666064831416	0.901249463425564	0.999999965386961
ADAM22	56.7398523351731	2.0526974748201	0.568543247977762	15.4194578208583	0.16408780144264	0.62539604043933
ADAM33	2618.35976390972	0.756595365532708	0.197647435470204	40.7763893368077	2.63316171021504e-05	0.000870846321573305
ADAM8	153.534395018279	1.26910322369646	0.58256802217242	13.8237053605746	0.242902567000807	0.769080726217518
ADAM9	1125.74291675495	0.674774602333136	0.198800740444666	19.8876666678992	0.0469052335761559	0.292366546186758
ADAMDEC1	73.7605920739812	2.87694126672907	1.02572209962084	21.8101200746589	0.0258862281993016	0.199760470002297
ADAMTS1	2406.93177541182	0.519437821633943	0.185908879855588	12.7843927516558	0.307650726273912	0.862784522733386
ADAMTS10	447.015249158853	0.709524075177618	0.276354704524234	7.87473572803856	0.724478976093174	0.999999965386961
ADAMTS12	284.246464223116	1.19127145467637	0.363935964867477	13.6958428624718	0.250282920193493	0.781594729855616
ADAMTS13	43.0132851928787	1.94123075229627	0.53181163554103	15.5762969240913	0.157603734222859	0.609380627703026
ADAMTS15	335.117591901845	0.96222146958221	0.28385070679125	25.3526144376681	0.00809222577146659	0.0880258810010611
ADAMTS17	429.600182459248	1.26416806636681	0.298428346291225	29.3082458944182	0.00203283167664358	0.0312028562659847
ADAMTS18	277.368472260243	1.93989471142157	0.353440979135078	45.4790104720649	3.99577597007361e-06	0.000173957698095373
ADAMTS19	25.3551783120664	1.51904761347042	0.440192762076012	28.5049114900496	0.00270766495823588	0.0388631882189392
ADAMTS2	989.010798666419	2.47457820502057	0.599668034331426	23.4425499151405	0.0152994134256401	0.138546643989759
ADAMTS20	38.9686547734252	1.78828110611906	0.536269463130506	13.612003714929	0.255210940949654	0.787771120942321
ADAMTS4	80.4884266693963	4.00651318094926	0.780284568554556	25.1994821725711	0.00852290418481233	0.0908524965052747
ADAMTS5	964.030641125274	1.27526555532238	0.349211142714104	23.8812684576008	0.0132431619331159	0.125030738545854
ADAMTS6	124.825608830196	1.22920397164455	0.35978699762976	15.1675886684355	0.174952491302763	0.650237259473033
ADAMTS7	320.710634395523	0.778358341222834	0.355391844863561	11.1003505355367	0.434894944882356	0.992899825211654
ADAMTS9	580.451772283375	1.52596790312705	0.299547430454286	54.8637269260373	8.20787945534313e-08	5.58874228104644e-06
ADAMTSL1	168.134444141696	1.96764745169517	0.351196219617158	41.3141467994352	2.12772701755881e-05	0.000731982731669968
ADAMTSL2	382.009408283477	1.36355483800592	0.3985225339844	24.4219745946143	0.0110668584530176	0.109379025935952
ADAMTSL3	505.003081967565	0.750137107794336	0.220128384188018	32.452366037301	0.000645091577433742	0.0125188481861353
ADAMTSL4	1477.1602832615	0.667897907889821	0.303300916333698	19.5476850361946	0.0519434383840452	0.312395107724225
ADAMTSL5	264.159719618177	0.830565544125804	0.301701720029181	9.89489571163693	0.539865478709687	0.999999965386961
ADAP1	376.82830140766	0.413026065351969	0.20880660991717	7.22983328484145	0.780177371061239	0.999999965386961
ADAP2	181.419279064308	0.709960404069844	0.357206788945368	10.6256359621578	0.475137823913446	0.999999965386961
ADAR	1886.13757388748	0.448386805143863	0.215494215473769	18.1413362210817	0.0783585231433981	0.403807027048107
ADARB1	1589.93477990158	0.518412060520409	0.185099442284915	7.74292732892923	0.736130185001115	0.999999965386961
ADAT1	421.828270311118	0.404978813687865	0.19668674041705	9.68828198898956	0.558625148154231	0.999999965386961
ADAT2	107.90629989442	0.712202824633943	0.217783869683528	17.9053391746028	0.0838032293183025	0.420810790959684
ADAT3	17.7823511241676	1.29905793571371	0.562908753827744	6.88009834009537	0.808708569426689	0.999999965386961
ADCK1	112.646197545501	0.659461334784999	0.26686526684913	13.1680836170934	0.282481703496833	0.83198024719308
ADCK2	420.148858374109	0.335044264225039	0.180596805224379	7.8642346557599	0.725411442563621	0.999999965386961
ADCK5	1212.90773174366	0.480138415434783	0.212260547658686	7.54885066201223	0.753055887822661	0.999999965386961
ADCY1	84.9419764705566	2.14730020518024	0.585082113948668	15.1654650423768	0.175046501392347	0.650286021219294
ADCY2	355.079218739194	0.688221195057993	0.239082981912972	10.9230936034996	0.449728616140762	0.999999965386961
ADCY3	417.189975817997	0.977520379912385	0.242543362551393	12.1893087676547	0.349583088436184	0.910906263682455
ADCY4	299.939488533103	0.771094848411979	0.281899445099798	9.73730369383196	0.55416029631478	0.999999965386961
ADCY6	951.937923957872	0.64258977983136	0.211878163429166	6.2855584030101	0.853647673334499	0.999999965386961
ADCY7	1834.18851428761	0.648303057544446	0.213385787729354	7.04078828469318	0.795770824571268	0.999999965386961
ADCY9	407.361496847812	0.485782974200403	0.207472397152199	12.9555233589379	0.29624232631319	0.849749256467025
ADCYAP1R1	133.487251103445	1.65406071054752	0.4497704863697	18.0356125984059	0.0807579454655306	0.410846652241652
ADD1	3564.90807770009	0.74804427709482	0.207966133004727	11.9464558224054	0.367681411894764	0.926350235848774
ADD2	93.2236016582233	1.5438824645451	0.515445945274466	14.203524527948	0.221935541817017	0.73733709131779
ADD3	2708.95655008923	0.532602017732174	0.189124536045731	8.75776251687262	0.644240739228589	0.999999965386961
ADGRA2	1143.91485877682	1.12706550894671	0.332775548706382	11.8205307474347	0.377283514411481	0.936089393557026
ADGRA3	2995.22856117442	0.583444877760856	0.247314641387535	11.8328976252918	0.376334028815728	0.935766370547935
ADGRB1	86.5115758270186	1.13375302583308	0.595384971126318	2.90567637133705	0.991914558849169	0.999999965386961
ADGRB2	66.2338551006766	1.26536639871055	0.38016051053211	16.9624654865773	0.108990762933984	0.495691819199803
ADGRD1	196.34897722541	2.26075087965922	0.436872201289814	23.307690999618	0.0159895511544286	0.14299597892136
ADGRE2	19.9559950778607	3.36169580638203	0.856971228098216	22.9791252751576	0.0177953200300991	0.153049085468658
ADGRE3	9.13959859026227	3.84817696056123	0.947270199699409	21.8377774349902	0.0256605551017965	0.198330087703516
ADGRE5	652.512988978017	0.396016477558431	0.377383433310623	11.457664848268	0.405755308255679	0.964305912542904
ADGRF1	16.2974560050101	1.82670293458275	1.16308165405934	6.3828158471253	0.84664042941948	0.999999965386961
ADGRF2	1190.29574519086	0.582544312185754	0.230518877726224	16.3196646381613	0.129672201448603	0.549222897138531
ADGRF3	0.34787483954372	0.242900487354251	6.19550950575596	1.0013973849706	0.999949251244428	NA
ADGRF4	1184.92589522881	0.562449889294379	0.194226846118751	8.72554760942484	0.647208844229792	0.999999965386961
ADGRF5	1419.37872800919	1.02438318347135	0.19248590534677	53.5869848115819	1.40380026311962e-07	9.14701376743971e-06
ADGRG1	4333.50754272589	0.449210420602965	0.155164052131194	17.497620002018	0.0939936820001825	0.454002865586547
ADGRG2	345.714825828428	0.944215862462748	0.188392671361319	25.0953340181985	0.0088281698211875	0.0929484888931662
ADGRG3	45.4676837287052	2.01253306098254	0.781454075003241	11.966818981594	0.366142501848674	0.92596737583578
ADGRG5	30.3548863501921	2.55116963912788	0.69873194569021	23.4158609320656	0.0154337310820776	0.139442130501893
ADGRG6	935.75895195073	0.445300223338634	0.233059796145419	8.64707599790495	0.654432132439128	0.999999965386961
ADGRL1	1474.91792679303	0.582593734046196	0.261884698361197	8.53956755408507	0.664308947556957	0.999999965386961
ADGRL2	4005.08445874105	0.403011039986974	0.199055428528112	6.03397764761098	0.871087561906469	0.999999965386961
ADGRL3	1152.93668420691	0.484773580468838	0.216247495923292	16.304963797721	0.130181493184172	0.55052373177083
ADGRL4	280.265976450774	1.13816525136372	0.348673169929154	15.8039938624836	0.148564939732025	0.590244721207438
ADGRV1	102.925757307116	1.31909160955763	0.437792671957989	4.16068754348345	0.96497842235663	0.999999965386961
ADH7	0.17185126349664	-9.96578428466209	7.25997055176832	0.68046189681472	0.999993066493368	NA
ADHFE1	85.3252112473573	0.608687193478917	0.383756873840427	5.11951893475901	0.925240355395706	0.999999965386961
ADI1	1231.92456497709	0.542952669959454	0.264893255166487	7.24440538248217	0.778959712958173	0.999999965386961
ADIG	129.15236719678	1.85310076262405	0.353690240876157	67.4018857033959	3.79768219096959e-10	4.72979684518352e-08
ADIPOQ	66.325545226588	3.44500735919896	1.27178816366862	9.51895162708507	0.574104262244077	0.999999965386961
ADIPOR1	1649.52432139668	0.183541252754976	0.145392575375955	3.66792385375845	0.97864455502575	0.999999965386961
ADIPOR2	1180.23486176394	0.366016619698194	0.136616740612313	10.2024562822035	0.512273374906884	0.999999965386961
ADIRF	2663.44983135395	1.12577545380078	0.260526490212479	37.7550043297895	8.60438555914058e-05	0.00241415024994257
ADK	1427.97314363441	0.956697356083573	0.224380406083683	13.5560395748232	0.258539706012993	0.792457013584814
ADM	611.55482192415	1.19775518135589	0.257942098721302	24.7204458073252	0.0100151884552547	0.102272381122212
ADM2	426.382737674836	2.6524122173662	0.452405923527576	61.1467156795145	5.67352270440541e-09	5.39340965107679e-07
ADM5	30.2023987618023	1.16940055396765	0.541555125150005	9.39037937992958	0.585906485786635	0.999999965386961
ADNP	3231.21609269087	0.317869027255007	0.184674875020528	4.54110576152789	0.951342522624775	0.999999965386961
ADNP2	896.611716121477	0.42272480219182	0.132862735973433	10.5244203679812	0.483920926652331	0.999999965386961
ADO	1747.8664922796	0.405425258712861	0.161848370187959	3.49388180214032	0.982460807779902	0.999999965386961
ADORA1	35.0331907894766	2.18180442586193	0.529271769744934	17.6637715467324	0.08971738559773	0.440154254248849
ADORA2B	492.115511932161	0.553749129236503	0.179857066684736	6.77830432109204	0.816742157507942	0.999999965386961
ADORA3	111.716646917781	1.09347353221115	0.484900967489886	13.776600194566	0.245602540404075	0.773235463154413
ADPGK	595.884349745169	0.265469987945626	0.147101560833993	10.5072993780766	0.48541309745951	0.999999965386961
ADPRH	72.9381016436383	0.798277120657537	0.478229200753076	1.73489061912687	0.999232077568498	0.999999965386961
ADPRHL2	817.038022295757	0.286197100124381	0.141883161218728	8.83971855092454	0.636684212703778	0.999999965386961
ADPRM	201.029916708065	0.954337608045047	0.277662283434739	13.4871271079549	0.262681855777154	0.800020994214987
ADRA1A	136.796125117399	1.23164600718267	0.415264427105656	14.9668741743995	0.184018474804347	0.66970881213241
ADRA1B	48.6283228791722	0.930476656156081	0.545565549199633	6.28025610355144	0.854025549430099	0.999999965386961
ADRA1D	401.019659059243	0.936488646891318	0.371359162899855	10.945783738066	0.447816492015174	0.999999965386961
ADRA2A	150.075513486964	1.07539605211963	0.471619967927011	17.1429927398097	0.103716470284429	0.480785088870904
ADRA2C	37.3464542027247	1.44727944980859	0.439912079389925	21.0862841965795	0.032488062770747	0.232443693872686
ADRB1	59.8486797905409	1.73376265222683	0.555374626728093	11.1452187889827	0.431178777139203	0.989819875938549
ADRB2	106.529709404236	1.05134303072308	0.362653628081806	22.5382885191609	0.0205194037731336	0.169548295545006
ADRM1	1950.86342171551	0.313641952483868	0.144985625643434	10.1973475896873	0.512727933029679	0.999999965386961
ADSL	720.772837580594	0.285330937244562	0.129864928424935	10.5906716849868	0.478164387888756	0.999999965386961
ADSS	489.681865028833	0.408903526295304	0.161846294750929	12.0774333773637	0.357851046796388	0.91812709397889
ADSSL1	153.726824729084	0.631126357639302	0.220516356238343	13.7833136340745	0.245216387694368	0.773229521248285
ADTRP	3038.65394950877	1.01914807628775	0.325274252145274	31.6401091720268	0.000870986427205792	0.0159286904410368
AEBP1	5956.86467648507	1.03923134498851	0.330564748276815	17.2989662227462	0.0993380286107271	0.468658289859
AEBP2	1829.88119834242	0.386347923154188	0.147711225262329	6.28316416877072	0.85381835557049	0.999999965386961
AEN	380.003406725275	0.603352117672211	0.194020906665241	15.3201584308617	0.168304044882337	0.635434956867733
AES	5669.72233430905	0.219072622261075	0.156097843537101	5.47716363948393	0.905878318552799	0.999999965386961
AFAP1	912.751778133732	0.436588761926436	0.199249377757674	6.06193437651928	0.869199981065402	0.999999965386961
AFAP1L1	140.255553967201	0.806609300782308	0.23922833713516	29.8398363756707	0.00167897758134321	0.0269046586691137
AFAP1L2	1743.56864999902	0.660689648336559	0.2262650336892	12.7348565357777	0.311007747431025	0.867594337106281
AFDN	11023.2480206207	0.477241246512271	0.176606576535044	12.8332019179736	0.304366961723728	0.859264565814458
AFF1	2840.82395924538	0.391981689530685	0.17356194523923	13.8741986575652	0.240032931770714	0.765231996074897
AFF2	12.6640239158878	2.10331869342066	0.773528639590067	14.9129269584036	0.186517984395444	0.674687664877491
AFF3	383.914934549442	0.798807887565505	0.239317189068364	23.8578297407842	0.0133460832214328	0.125477413106238
AFF4	3118.95006957693	0.390364138105811	0.177795338907897	7.1776595734101	0.784519129925987	0.999999965386961
AFG3L2	1748.18263720911	0.235818469312939	0.0882713942054058	8.70299347188694	0.649285974852656	0.999999965386961
AFMID	93.7200256259271	0.805957546260612	0.364864804706172	2.95093150283731	0.991358570063127	0.999999965386961
AFTPH	1839.21145153797	0.381863611394089	0.146795549155336	5.45239237389842	0.907296856098451	0.999999965386961
AGA	510.836133652606	0.5619532287755	0.132862586878073	25.7850931510989	0.00698491496153576	0.0791757814591594
AGAP1	815.347107602135	0.763645962473862	0.229220185358079	18.807167948463	0.0646439539934138	0.359441572953489
AGAP2	100.488846367083	0.911218355489213	0.252750892030973	14.5745555886711	0.202813927020902	0.703875212683829
AGAP3	1635.36652402076	0.581541798168526	0.1745552359803	10.4676555388985	0.488875247056397	0.999999965386961
AGBL2	45.7634346795802	0.692643376179748	0.292846428626156	12.9427884045712	0.297081184857967	0.850445672917525
AGBL5	229.415973376678	0.671012440508269	0.244389933454779	5.08446965619441	0.927006810548565	0.999999965386961
AGER	50.7186006161219	0.928409932704352	0.387767450897648	14.871366484151	0.18846190555569	0.677856585180929
AGFG1	1280.12368671178	0.419225379238781	0.177889941949205	3.15835881588606	0.988463083778212	0.999999965386961
AGFG2	477.773873783364	0.363788885744454	0.17917717326541	5.45453578719435	0.907174561985406	0.999999965386961
AGGF1	1454.20373991179	0.336362631890184	0.128620171253159	8.68643084098119	0.6508108102745	0.999999965386961
AGK	368.171232147762	0.329645878893688	0.152537233450101	9.04882956751214	0.617385018546147	0.999999965386961
AGL	604.772967033214	0.309280196387956	0.200335642951422	3.4718874137439	0.982907717185799	0.999999965386961
AGMAT	13.9492111282772	1.7109096122142	0.523668095131084	24.66288049736	0.0102103502192371	0.1034498840504
AGMO	166.46034752213	0.689623481709995	0.374351938370811	5.67855445879957	0.893928314488434	0.999999965386961
AGO1	2453.94884319114	0.312600185521476	0.168843522769134	6.04320350476746	0.870466075355006	0.999999965386961
AGO2	3238.09190906044	0.521258868063184	0.208224521567175	9.48010211171027	0.577666520154267	0.999999965386961
AGO3	1474.44773745028	0.537272310543498	0.22163276411386	8.32017620005439	0.684368192023838	0.999999965386961
AGP	19.4640418266986	4.75230206775339	1.13609179078815	52.6479828475954	2.08007162509716e-07	1.27911404495818e-05
AGPAT1	1064.90970336308	0.435228065829735	0.172145099513468	9.98030230001439	0.532159845853133	0.999999965386961
AGPAT2	2285.21400352045	0.345950356668508	0.169387985788848	6.45377184216187	0.841438859171435	0.999999965386961
AGPAT3	1858.46998268859	0.389007454337734	0.123203859605701	17.9386101017436	0.0830160509724994	0.418440023318863
AGPAT5	1578.8274597626	0.684037334189042	0.179493020178992	37.5279537792655	9.39595607171439e-05	0.00260047290547392
AGPS	908.394637534773	0.724714232834896	0.197293393460431	26.9215957986542	0.00472218977243672	0.0589614532626965
AGR2	49.5316124221975	5.43529122442118	0.865731288903996	88.0748740266473	3.96968642922881e-14	9.76443619429557e-12
AGRN	3961.4201519526	0.539568629640688	0.230810566770036	10.7273351885199	0.466380977853974	0.999999965386961
AGRP	1.57009481692073	2.08869435511827	1.92878474024146	14.2089780150368	0.221644830459911	NA
AGT	85.5337633239071	1.99704952068575	1.40225542563282	1.28015306096796	0.999825642814172	0.999999965386961
AGTPBP1	520.699437279378	0.66344045352174	0.168339226660627	42.8088752108859	1.17250562663831e-05	0.000441158044378368
AGTR1	251.135681797889	1.19750567589582	0.291773117324905	25.3365659730329	0.00813637143954425	0.0882621373689922
AGTR2	0.300055163512304	-9.96578428466209	7.25997055171166	0.843046881262339	0.999978958150485	NA
AGTRAP	436.340850190323	0.259903169091931	0.16012155906343	4.73136878201922	0.94347496555842	0.999999965386961
AHCTF1	1903.05010226682	0.435442574269301	0.157663448322892	12.18821527312	0.349663322173139	0.910906263682455
AHCY	13943.4664384182	1.17645793392407	0.327397432674979	8.39189878939567	0.677827260849017	0.999999965386961
AHCYL1	2447.97692415045	0.33398505688717	0.103852747763607	13.1254847765615	0.285203000762553	0.835520849490857
AHCYL2	1492.08564305388	0.568976304343961	0.162346174982314	32.4887524440978	0.000636437275115633	0.0123998145541836
AHDC1	747.488885503267	0.768058045369999	0.236730044479023	10.9537109257251	0.447149365225326	0.999999965386961
AHI1	569.735169932974	0.315882022637754	0.240665813971335	8.70382415772235	0.649209486364513	0.999999965386961
AHNAK	86141.3932995506	0.747229850365542	0.24021016532022	13.9918361064937	0.233445548685632	0.755052647017793
AHNAK2	5440.48719721967	0.524890887901153	0.184184370994704	7.88043335189082	0.723972749366245	0.999999965386961
AHR	1618.04959512345	0.905600164654051	0.279603674292183	14.2485308295466	0.219545058225596	0.733226652738723
AHRR	69.257677779226	1.31505112492274	0.480038165778411	10.5062581361189	0.485503905654103	0.999999965386961
AHSA1	2285.85430704876	0.620434593166438	0.169768898230139	18.309131276292	0.0746793273116005	0.392820048874011
AHSA2	341.657756224634	0.58612396685709	0.177920784144076	22.196734172754	0.0228926547984422	0.183046939522611
AHSP	6.65354764479607	1.79494048743696	1.01078548684023	6.61632500819175	0.829249181359427	0.999999965386961
AIDA	1798.0025068016	0.51111573942787	0.206957311575332	14.3364742757753	0.21493089228067	0.725954359474601
AIF1	294.792767517833	1.10401423525562	0.485764331186559	19.0547156573804	0.0601183896968238	0.344507820597327
AIF1L	1589.94232188743	0.42551400418	0.178045442853587	10.7791911100805	0.461943207221706	0.999999965386961
AIFM1	708.353099577669	0.48549456039894	0.134104770429169	14.9834447870317	0.183256090565788	0.668228880810435
AIFM2	321.98920986055	0.580553781455062	0.295390921594295	8.7937111631183	0.64092707457996	0.999999965386961
AIFM3	31.0605834101606	1.35841900157495	0.460747999295297	14.9861991839277	0.183129609890333	0.668204054037081
AIG1	550.022848739933	0.768290809568491	0.208869826948125	17.0206499271153	0.107266247624769	0.49100433628279
AIM1	8846.57669346065	0.557074703417466	0.203962011537511	16.6304464714126	0.11929206699385	0.521882902246548
AIM1L	2445.77580232499	0.620685997463411	0.219972713987225	20.0330512460334	0.0448894597833213	0.284911875521129
AIMP1	3227.33064388957	0.584038529164457	0.245592431051697	5.55477433321494	0.901360640300454	0.999999965386961
AIMP2	732.373151746695	0.389571115648919	0.164223505236279	7.30273989043422	0.774063861789986	0.999999965386961
AIP	692.660695017427	0.337925855075761	0.179829291814422	11.568407342883	0.396942424457926	0.957469113567426
AJUBA	3797.40636872692	0.379982298411648	0.0999475234272307	25.1757136785564	0.00859167495591403	0.0912396005302085
AK1	246.542633158563	0.755293719758403	0.328305821674422	15.4254929361675	0.163834341545816	0.624911697548727
AK2	2175.89705006354	0.414867147323574	0.139784540741477	21.9253535557414	0.0249579587976987	0.194581106664467
AK3	2004.29515768107	0.547479320767978	0.201440570689614	13.1771298815176	0.281906164053097	0.831135387159917
AK4	2325.63826197406	0.808083783729208	0.227007203978727	28.6919890382244	0.00253346924128901	0.0373435263895768
AK5	7.03466200431306	2.04767187461122	0.999668789743925	5.57731958113342	0.900027604022717	0.999999965386961
AK6	242.715641288035	0.576424862502112	0.388681230974846	6.08343694977162	0.867739436448449	0.999999965386961
AK7	7.91519548033593	1.38050544160371	0.668801759828592	7.59531405285665	0.749030584354956	0.999999965386961
AK8	84.0185693477968	0.952677600308941	0.268147372724123	16.9419740677043	0.109603737448582	0.497068989516754
AK9	3.0256576102101	2.68396877883944	1.51614918364957	6.68808191191275	0.82375158811398	0.999999965386961
AKAP1	988.806162480002	0.357104300614413	0.184364267181928	11.5930832316205	0.394993306001933	0.955226530110119
AKAP10	1060.19279820068	0.279015066711195	0.0973955949677578	17.1836202350535	0.102560253687508	0.477562866082058
AKAP11	2552.42661805571	0.276827441771392	0.198456274799884	4.05411395765975	0.968307217197568	0.999999965386961
AKAP12	1059.8329850996	1.02521695755148	0.297797429488024	10.8787240271518	0.453478711995728	0.999999965386961
AKAP13	3949.87590361419	0.530079961006421	0.233150905440605	9.1337690963345	0.6095462608388	0.999999965386961
AKAP17A	1025.93243552512	0.43610593737097	0.178556472069279	16.2103767879245	0.133498674553928	0.55822076452873
AKAP2	2193.48941521504	0.558415551292441	0.19725384986747	11.1158850272631	0.43360651674935	0.992050255240765
AKAP3	53.7092775184687	1.21632117652689	0.620120397265511	2.66933325701268	0.99441410728847	0.999999965386961
AKAP4	249.791552703833	1.94487016390069	0.313890369480497	47.6150978721484	1.67185871528681e-06	8.2453222554922e-05
AKAP5	116.104113143428	0.650837196982851	0.247660539699435	15.4121262652279	0.164396137276495	0.625930857105478
AKAP7	90.1487489263166	1.50111871902693	0.305553127834521	35.0610394875221	0.000242121548959607	0.00565180052245213
AKAP8	1429.2903190292	0.365998623551699	0.145935137524413	9.5754999890213	0.568925939564766	0.999999965386961
AKAP8L	1362.23948048465	0.791134187657652	0.184594740047215	20.054178981193	0.0446031684182103	0.283861949590408
AKAP9	4134.77234445379	0.380363851683093	0.160076504559837	13.4565778469475	0.264533367004689	0.802572864002202
AKIP1	339.840561856489	0.361870295924229	0.240414597280162	5.15754057720568	0.923297386950258	0.999999965386961
AKIRIN1	1679.98752965243	0.351210374199982	0.119171216621806	16.0191357871234	0.140421956496423	0.571974127068279
AKIRIN2	1403.57134465674	0.312177684702974	0.144047552425631	8.01524849467887	0.711937240299661	0.999999965386961
AKNA	278.852005871283	0.528777001993539	0.36723955571425	3.54647166493265	0.981360445027166	0.999999965386961
AKR1A1	1413.49423579089	0.442694014624696	0.15770467409349	17.4831112850317	0.0943753781605863	0.45517614986373
AKR1B1	490.587268123375	0.546384768187163	0.30989379055214	9.03992482525388	0.618206962066608	0.999999965386961
AKR1D1	75.5715945960182	5.49027884592645	1.14531471975424	61.6936116730538	4.48627330971089e-09	4.37034090042034e-07
AKR1E2	20.3537924961939	1.4937475592268	0.547778874309076	23.5154754922437	0.01493798450112	0.136403554066375
AKT1	3736.31253330809	0.287549822948716	0.15412150017098	4.44152509495916	0.955180149236112	0.999999965386961
AKT1S1	775.034083401022	0.357749205949595	0.141484291944623	12.9879361123313	0.294114631625417	0.846633663125359
AKT2	1797.2348826061	0.387330697714722	0.139155721081206	6.02450675767733	0.871724090506515	0.999999965386961
AKT3	1210.93100495386	0.683859468409272	0.22411893264261	14.3781713430407	0.212769359961233	0.722085772388116
AKTIP	2488.60186551357	0.57616257026997	0.203575963740096	6.41555080392175	0.844249954561151	0.999999965386961
ALAD	503.599472526759	0.829875024493318	0.205545064400288	19.1110493418016	0.0591290343141844	0.340324404712525
ALAS1	1392.08918461279	0.623493074367775	0.159630270648747	39.2553328035897	4.79331753845262e-05	0.0014646413435042
ALB	1.29036643778124	1.81765421749866	1.80362956276677	9.94435473829968	0.535399348981401	NA
ALCAM	4233.28117977727	0.311361104453338	0.186980112784726	7.79825331788345	0.731253951761138	0.999999965386961
ALDH16A1	407.333227792974	0.458488100789258	0.167301736578932	13.3287392400414	0.272383238584614	0.816787553604136
ALDH18A1	889.277300515581	0.78056496603292	0.177303683796092	29.1778007792731	0.00213010633808105	0.0323178354053654
ALDH1A1	2030.29379603448	2.53569536159916	0.324035671453025	130.754329601246	1.22484452031721e-22	1.00427043628342e-19
ALDH1A2	108.438273899533	1.69018992746974	0.608490773390958	5.20540188023938	0.920812205038784	0.999999965386961
ALDH1A3	1434.12606599058	0.608889278331431	0.17319101220724	31.3454736253419	0.00097060355660625	0.0174517726708273
ALDH1L1	11.249444991222	1.2950523249449	0.581966461674772	7.54302505294095	0.753559329859504	0.999999965386961
ALDH1L2	735.187119854374	0.772087379088668	0.353240348570418	8.55965599331574	0.662465383740848	0.999999965386961
ALDH2	9116.97012383953	0.747570503837162	0.234005470483958	11.5057168108448	0.401918259818152	0.960873225209767
ALDH3A2	6516.55951227644	0.439989160146516	0.122723505765156	24.5195806515468	0.0107119436784823	0.106999811017855
ALDH3B1	129.031232793597	0.774286005382882	0.391049988286062	2.81572956810646	0.992943725573048	0.999999965386961
ALDH4A1	1033.73264426535	0.502396128773941	0.164938610219403	9.68254140409175	0.559148513946097	0.999999965386961
ALDH5A1	413.090913461952	0.478399014378297	0.157403727477941	12.6372303037145	0.317695376028869	0.875432256912946
ALDH6A1	2335.12777717719	0.418073662560776	0.191325504688043	5.24742478369228	0.918594116557254	0.999999965386961
ALDH7A1	2737.38336733127	0.480448051297401	0.126035909975619	14.4517264340714	0.208997244919727	0.715766706517844
ALDH9A1	1463.8072204625	0.319788703592231	0.14321693774958	20.9609649872639	0.0337777320100172	0.237809735417931
ALDOA	12212.6617016641	0.509962961275815	0.138360126992283	12.4909109853088	0.327895608361814	0.888630194733881
ALDOB	4.29482961545065	2.66984670472016	1.13778677711081	14.2608555248167	0.218893883376337	0.732425410147858
ALDOC	241.065519785354	2.01114424509975	0.363816861693234	37.2923566972721	0.000102928282349694	0.00280141457825349
ALG1	265.719253004772	0.251184226176385	0.233586545832357	7.89303058617571	0.722852775083983	0.999999965386961
ALG10	1124.93091185142	0.551869868078832	0.188936197492474	6.78100479863173	0.816530726060751	0.999999965386961
ALG11	712.591118970086	0.240510946228618	0.154772026930635	3.25079947239959	0.986978844445744	0.999999965386961
ALG12	903.90817868351	0.451217898394448	0.174062739026902	10.3868473329838	0.495961959515507	0.999999965386961
ALG14	516.780705185702	0.573248120521059	0.247397796130627	3.9274347960615	0.971991792251927	0.999999965386961
ALG2	1313.70498669833	0.395598770565726	0.199303825633057	6.02608253830175	0.871618286964987	0.999999965386961
ALG3	272.544065833028	0.615678563573116	0.211551274838266	14.0445570963579	0.230537750795979	0.750171730122678
ALG5	359.807553242969	0.589102156251655	0.249189143459625	13.9246550932205	0.237190703171912	0.760789130790741
ALG6	344.19750593179	0.906298059419624	0.235850644011767	9.78126927933948	0.550162978434407	0.999999965386961
ALG8	229.60436117564	0.364553789618721	0.237428979218575	3.97601482412455	0.970613392717589	0.999999965386961
ALG9	550.76316307274	0.475536816724665	0.166293364979041	9.21494870005375	0.602059001739717	0.999999965386961
ALK	30.4416553604017	1.53033779146944	0.551548679932065	13.9989756536593	0.233050163948553	0.754145884916893
ALKBH1	333.502884750977	0.370838032616228	0.144785991632975	12.0257932367733	0.36170755021128	0.922581726756585
ALKBH2	80.584003299455	0.550201223296756	0.28677843431715	3.74598698412592	0.976767109667641	0.999999965386961
ALKBH3	229.646591104049	0.713118262438225	0.17595640966368	24.9209473840414	0.00936268670324413	0.0971212171567939
ALKBH4	504.053176773163	0.358635768061327	0.194142832352173	3.44793331833847	0.98338562332577	0.999999965386961
ALKBH5	2400.68041604634	0.233493801964104	0.122237482641335	4.31848944272355	0.959657812377329	0.999999965386961
ALKBH6	273.427031359896	0.775171707855917	0.207618598187764	16.4960127878931	0.123692455544777	0.532724915782476
ALKBH7	402.362334241873	0.490430974346241	0.225697669691909	8.58991032295995	0.659687088199011	0.999999965386961
ALKBH8	241.613971360274	0.559290789589802	0.266083142059025	4.50964831486067	0.952575557868959	0.999999965386961
ALMS1	1120.2841479586	0.70841835441996	0.259765132779639	9.61705710602291	0.5651259748274	0.999999965386961
ALOX12	810.166511166366	0.575922804639754	0.277512693413655	12.8715762494506	0.301801972681929	0.857449025624577
ALOX12B	385.395467999468	0.965754653623355	0.305013721218067	13.8425328038375	0.241829599599888	0.767659761401289
ALOX5	317.022348771254	1.07534979536734	0.400857314713107	17.9212628849345	0.0834256665517632	0.419966811564491
ALOX5AP	190.711721330504	1.39868698613518	0.45132850275011	21.0941356567297	0.032408792209407	0.232243340530484
ALOXE3	523.050520289458	0.50762616487314	0.222652541944143	8.66978391760534	0.652342946757486	0.999999965386961
ALPK1	215.803000657896	0.621877644998622	0.279201377791557	5.33460646977915	0.91388548657871	0.999999965386961
ALPK3	227.006994110052	1.6207086136662	0.297208376503737	70.4903449597905	9.85610368844871e-11	1.40542324913981e-08
ALPL	171.935949468244	0.866132876856183	0.293539417124644	10.4528393515361	0.490171648524781	0.999999965386961
ALS2	1252.22128558624	0.354453926826924	0.175615077004373	6.08091544623625	0.867911098990275	0.999999965386961
ALS2CL	807.230900760284	0.621231317211066	0.226123415830142	17.6059293375267	0.0911864464227706	0.444370206217751
ALS2CR12	0.191180843100782	-9.96578428466209	7.17840982906874	0.882026108007562	0.999973456943552	NA
ALX3	31.9900590607875	1.20945433499355	0.437072191099798	16.7598378440055	0.115182971201115	0.511226350545093
ALX4	140.8989473808	1.66573770255546	0.370325430000338	27.5342118338425	0.00381335338024422	0.0504649028835415
ALYREF	1110.15195051395	0.400652154772516	0.172835293288154	20.2913701652091	0.0415012767327085	0.271226211739036
AMACR	165.406879656092	0.814436332983679	0.27483294446358	10.2365325141508	0.509244883646827	0.999999965386961
AMBN	4.42133115784041	3.05135950604108	1.26373870480814	12.2384800984364	0.345987086568045	0.907293961818495
AMBRA1	1414.31022995363	0.374940061624192	0.142918744502364	9.64528665730336	0.562547545408057	0.999999965386961
AMD1	2033.25118011665	0.563947424422915	0.189166290622494	12.6841720878127	0.314467913966783	0.871931747363442
AMDHD1	54.2925177395776	1.05072982830556	0.396453648195418	8.68889230575599	0.650584224228417	0.999999965386961
AMDHD2	883.990276707299	0.776997709926066	0.209837612520451	20.6374108830221	0.0373281565726723	0.253378221813399
AMELX	0.20459291786469	-9.96578428466209	7.25997055181292	0.599378187171425	0.999996429861598	NA
AMER1	486.71246026044	0.334498279752872	0.200580847412409	4.42777407062601	0.955695032052499	0.999999965386961
AMFR	3806.04144603806	0.156006381970644	0.108381506410442	3.44759089830734	0.983392388565749	0.999999965386961
AMH	5.33252502892751	2.34570119556208	0.913755479469324	5.61710550922896	0.897652623147952	0.999999965386961
AMHR2	87.5587201551892	1.51704341846682	0.435838168990079	10.3461402062345	0.499546517173953	0.999999965386961
AMIGO1	131.906655996913	0.877197671854213	0.350813200372978	14.2805768329342	0.217854984263895	0.730190832966261
AMIGO2	385.610255343807	0.511665767020554	0.235332701660897	6.59791811357445	0.830648109711897	0.999999965386961
AMIGO3	84.7081150147712	0.906119665942012	0.379449724999052	4.61495455793585	0.94837242439867	0.999999965386961
AMMECR1	1073.16610138731	1.07179952823026	0.24836626804645	20.4322601846717	0.0397532632800442	0.263832956096024
AMMECR1L	1406.51292734695	0.541552768803827	0.130150981658947	18.4452468421047	0.0718078632882404	0.385653693718885
AMN1	612.989972305869	0.376291811455931	0.195867922905278	7.75217838046467	0.735316324465504	0.999999965386961
AMOT	917.422650027155	0.472811732608291	0.162183511867521	12.2169620065158	0.347557886493916	0.909112761234119
AMOTL1	4475.89157861457	0.427169946550318	0.185264316674566	8.8007650773427	0.640276688920037	0.999999965386961
AMOTL2	2303.56772567252	0.416225704544728	0.155331465502775	18.1466254841598	0.0782401495928796	0.403779088300206
AMPD1	3.81913683544593	1.60866745037806	1.10273680196971	11.1076575017612	0.434288669770071	0.99234615275673
AMPD2	1020.22999741205	0.398792330740283	0.161883976409738	13.255475936898	0.276956148402755	0.823375572710162
AMPD3	1114.04804017181	0.390354880773623	0.257412230947589	5.5979818091771	0.898797777930486	0.999999965386961
AMPH	12.7730505991496	2.20043508540107	0.690039730316121	20.4837141516742	0.0391318393799658	0.261029266209819
AMT	465.113194887934	0.62470286992276	0.175926304427267	16.539011928164	0.122270264772999	0.528460573338689
AMTN	3.03764719485937	2.52989349617038	1.83319639576967	3.37096689520362	0.984859757313446	0.999999965386961
AMZ2	1060.96448447397	0.265547928072096	0.145485366246259	11.5454457654016	0.398760934269009	0.959053250544532
ANAPC1	979.531291388673	0.322194415998271	0.157806416836234	11.1253235346828	0.432824617603263	0.991745559910329
ANAPC10	158.984910209019	0.323956404395861	0.254127229142533	3.7281745631318	0.977204734147599	0.999999965386961
ANAPC11	937.509866222999	0.242151302565468	0.199739299235017	2.91265118633385	0.991830564255979	0.999999965386961
ANAPC13	820.475628158495	0.338290082878028	0.178396431588081	14.5596722819809	0.203555493306117	0.705453504275761
ANAPC15	1134.27006066352	0.305189992098084	0.149093874330111	6.20836965342352	0.859105560911974	0.999999965386961
ANAPC16	1517.26734902783	0.569275861733875	0.235713255827056	6.35659526522608	0.848543666339451	0.999999965386961
ANAPC2	1548.50509023983	0.334508155795098	0.173291980871789	3.54483310601745	0.981395410901773	0.999999965386961
ANAPC4	667.659136957872	0.762479588587127	0.150954301961355	27.5291812248457	0.00382008183462052	0.0505087780713298
ANAPC5	697.58468872549	0.314057590876759	0.150452197472504	7.02966939831538	0.796675746029288	0.999999965386961
ANAPC7	1137.9965914969	0.228169879637768	0.103704770712755	19.5774489741505	0.0514835753847135	0.311337982919604
ANGEL1	230.580009455584	0.505436974005396	0.199699761443567	10.7364611634827	0.465598630086491	0.999999965386961
ANGEL2	1170.94684957895	0.420172480560397	0.191121084195309	8.95194855256341	0.626327820733393	0.999999965386961
ANGPT1	66.0116005841694	1.07578021790469	0.436075508384075	12.1877888309928	0.349694614919064	0.910906263682455
ANGPT2	114.296128913299	0.797726159823741	0.344722300831153	8.63577073348	0.65547188829465	0.999999965386961
ANGPT4	176.127001655737	1.70935576582778	0.478990936968407	26.1670589706955	0.0061284399141518	0.0715699944395722
ANGPTL1	330.148269781092	1.31628551753201	0.508297419278082	19.717361649748	0.0493708124874646	0.302842533705838
ANGPTL2	1423.62887407901	0.870974407406507	0.36211791484334	12.6820998309793	0.3146099288212	0.871956926668108
ANGPTL3	0.760727614526259	0.205558451082241	2.56821761465651	6.76044510282634	0.818138068562974	NA
ANGPTL4	666.526352225806	0.916226202076655	0.303786217711417	20.5406098504855	0.038455049641559	0.258684237569161
ANGPTL5	148.477020202953	2.10985253574663	0.519161348007223	51.129901729473	3.91702444943163e-07	2.27372292377332e-05
ANGPTL6	12.7836202220606	1.9734950028177	0.839090125758888	7.13922265116611	0.787699460578264	0.999999965386961
ANGPTL7	4.77790330769095	2.22921117804007	1.17436380860956	7.67066318616693	0.742466218840224	0.999999965386961
ANGPTL8	82.9319322124264	2.35633165199594	0.392279275488015	65.326224942256	9.35602671372509e-10	1.01717068327449e-07
ANHX	1.860153041415	2.3620968082589	2.0339149566488	6.9310426115221	0.804639990796797	NA
ANK1	55.8778312630742	1.16522947997398	0.441048343171614	7.66000383078671	0.743397525659759	0.999999965386961
ANK2	772.551032578266	1.17048378081569	0.321436303769259	8.5915475521852	0.659536680617442	0.999999965386961
ANK3	1776.74632286697	0.284172694089235	0.186990154325188	5.16602924694678	0.922859814400194	0.999999965386961
ANKAR	43.2081945615041	1.07101070289036	0.350379671028799	20.0074535521128	0.0452385601141358	0.286116394668233
ANKDD1B	3.85142258842643	2.62483372900472	1.10776662038568	10.1570021891155	0.516322513658704	0.999999965386961
ANKFY1	2045.87877024404	0.3196292172122	0.172966509405778	2.49441816824765	0.995865712485267	0.999999965386961
ANKH	1774.78486152352	0.67248082448075	0.130853412047782	24.9479805011032	0.00927786133598625	0.0964956423729056
ANKIB1	1234.17364629646	0.379736866123987	0.158764638456581	8.8397178941845	0.636684273283075	0.999999965386961
ANKLE1	65.4547512118307	0.794712730598415	0.314011784042697	13.6576467616514	0.252519335059483	0.784880030848288
ANKLE2	1048.41318744228	0.390094176930481	0.187199250319496	9.4769153625096	0.577958884345748	0.999999965386961
ANKMY1	43.8754200776047	0.824952140465677	0.384844980151921	11.5987584295315	0.394545787877405	0.954904817428224
ANKMY2	797.337081338202	0.279710761773521	0.14961542120419	4.90619414239552	0.935624199206036	0.999999965386961
ANKRA2	530.663830526857	0.426354665485249	0.170976000234384	6.45779945466461	0.841141390773207	0.999999965386961
ANKRD10	2054.795924726	0.468832897054583	0.12068635771378	28.5980670084342	0.00261952827200343	0.0380702195985846
ANKRD11	4048.82301159532	0.380863224857278	0.236984704485668	6.99954809844348	0.799120096047209	0.999999965386961
ANKRD12	6049.91196393599	0.544610712681712	0.198700256278773	22.3841620333851	0.0215603965019041	0.175533919058531
ANKRD13A	3060.62789400921	0.56647819675503	0.122223814700014	30.1415809277832	0.00150545666031206	0.0247422031588065
ANKRD13B	263.712799155646	0.848813071312311	0.214477672237088	15.5556471035292	0.158445284306911	0.610967329221762
ANKRD13C	717.835732192023	0.521335868673365	0.189822358576169	13.8567567541107	0.241021322615026	0.766454037882753
ANKRD13D	458.123303716655	0.508984487606955	0.158798321688126	12.9253215301184	0.298234386481065	0.851517158614974
ANKRD16	262.44052062989	0.473862237144881	0.209426926798671	4.97625724239015	0.932310990443232	0.999999965386961
ANKRD17	2327.36817803785	0.31774359546041	0.153358592894678	5.41224776701756	0.909571560282059	0.999999965386961
ANKRD2	19.2286432767614	0.881901800897519	0.551103551784407	7.93940044801263	0.718721764279112	0.999999965386961
ANKRD22	1520.75725134026	0.548842830492614	0.234027157551111	11.3698458810772	0.412818912444788	0.972053435334274
ANKRD23	124.40147952864	0.920077431812291	0.261325840750127	39.1542823589143	4.98689488670963e-05	0.00151907302756458
ANKRD27	1340.61067851089	0.372615789467245	0.131523617871443	10.246842812526	0.508329786778301	0.999999965386961
ANKRD28	893.477974137441	0.427302392363197	0.156858186247258	8.67270053359988	0.652074543916806	0.999999965386961
ANKRD29	262.635402608916	0.411498443473243	0.188244271204278	8.03336671586698	0.710311799250577	0.999999965386961
ANKRD31	47.6426370000917	1.40304238841335	0.648175224066615	6.57467913111748	0.832407590323404	0.999999965386961
ANKRD33	24.0725737867457	1.75578926212925	0.53079763012765	12.5678721514265	0.3225040903576	0.881359845262805
ANKRD33B	235.273874211391	2.24284520550294	0.5280009581326	25.2583506743617	0.00835482211710357	0.0896924111404059
ANKRD34A	34.0730771262846	2.83346443145885	0.752883226288394	17.2482587127367	0.100743621316057	0.472233882442341
ANKRD35	2142.44298923783	0.443929068175961	0.204059050169999	6.35172338110942	0.848896157688022	0.999999965386961
ANKRD37	52.8671268293185	1.16967311541464	0.389875105078023	21.4864363427679	0.0286677594302036	0.215225982906397
ANKRD39	274.745124207994	0.439058690116432	0.186263881406554	15.3096087739871	0.168757092207675	0.636560320620938
ANKRD40	921.54615918755	0.226490328110771	0.12600411096431	1.98518304616459	0.998547279154872	0.999999965386961
ANKRD42	319.397079686374	0.217344216795692	0.151732905696596	5.63812075548447	0.896386573570305	0.999999965386961
ANKRD44	577.35541061611	0.706853727679891	0.229020311242297	25.3162218137837	0.00819266286923722	0.0885427191568264
ANKRD45	169.358071696186	0.924305283024451	0.348473472071952	9.00115573870301	0.621785646166255	0.999999965386961
ANKRD46	1081.35551980931	0.278572282514853	0.153134214112836	12.2527511081001	0.344947779044369	0.906138352160606
ANKRD49	526.232434119628	0.620099502929843	0.217735580328663	5.23768544277004	0.919111181279457	0.999999965386961
ANKRD50	920.184573614994	0.423284048330837	0.173473446235465	11.9686008467889	0.36600802495928	0.925827074919333
ANKRD52	1534.38298644622	0.501459442892557	0.241261696812171	4.15361362565812	0.965205934961422	0.999999965386961
ANKRD53	4.96704194526463	2.96750129483981	0.854788587830947	23.4335086039927	0.0153447920502024	0.138766000902519
ANKRD54	595.576871853929	0.371858211955301	0.14682605842852	3.45259559913734	0.983293324301032	0.999999965386961
ANKRD6	257.850059593953	0.452735756888505	0.207661684159557	7.86990701871542	0.724907839600751	0.999999965386961
ANKRD61	34.1803519043501	0.945078360363468	0.52176106198366	4.71972120626265	0.943976855293092	0.999999965386961
ANKRD65	39.1200733728975	2.14659352011135	0.466582482510539	21.8754586745244	0.0253560290548989	0.196878647038047
ANKRD66	90.9198070011498	1.47469595178736	0.433013059044528	16.2023845030228	0.133782182716026	0.558931165920587
ANKRD7	11.9328721686807	1.60053356294404	0.729107686392178	6.69181997847005	0.823463301764279	0.999999965386961
ANKRD9	140.26833487604	0.738150889268745	0.293456887465182	11.6268195399453	0.392337212975465	0.952079378089925
ANKS1A	1941.07431102393	0.478034050319044	0.157842573565878	11.2819105149827	0.419956947693599	0.978021136381847
ANKS1B	10.2124459385647	1.64460008713058	0.758238940428543	11.2942856277619	0.41894852761499	0.97724859250922
ANKS3	270.169315258878	0.43500669432502	0.238128615837167	3.2883053009607	0.986340861711351	0.999999965386961
ANKS4B	218.445049643835	0.979694062208692	0.254119862797358	18.6814231245133	0.0670573191318903	0.367666181632025
ANKS6	134.248383207985	1.05527835331743	0.322523818329244	17.5151747048616	0.0935336462102965	0.452224837868849
ANKZF1	698.074890646497	0.523297750894265	0.202931727846534	10.1032871920614	0.521121053828773	0.999999965386961
ANLN	1019.86908670284	0.949903400302473	0.229330711807778	20.8840817667682	0.0345920845602056	0.241641121752121
ANO1	364.889472283713	1.40397309881735	0.361188424365293	25.0230031407028	0.00904625777366484	0.0946663599723745
ANO10	1100.65201990866	0.441822067841613	0.181590844432074	6.99728840523846	0.799303049259386	0.999999965386961
ANO2	53.8318333160477	1.81414101662356	0.448585265233562	14.5943911834797	0.201828887115715	0.702066261386431
ANO3	385.699526552528	0.528340110578701	0.358713687544423	4.6895659254962	0.945263953288638	0.999999965386961
ANO6	1953.55540622908	0.537689384894869	0.183165048535256	11.1211389253463	0.43317118965769	0.991963536609336
ANO7	35.92650279003	1.13293534415596	0.424147314333476	9.99710247415055	0.530647805124314	0.999999965386961
ANO8	1000.9915891079	0.683187387892516	0.286594997504805	6.50504411571461	0.837634505039963	0.999999965386961
ANO9	1604.4103404508	0.56732662740243	0.218870252543589	15.3327864871379	0.167763037032397	0.634366072775461
ANOS1	757.645977814111	0.872989435047554	0.270987101444737	17.0421029772917	0.106636342558305	0.489112171062417
ANP32A	3706.67088778544	0.271034535131957	0.160798338270191	4.83741118062972	0.938784026579636	0.999999965386961
ANP32B	4735.0816691975	0.338712319689783	0.129483369416325	13.2149280559861	0.279510298424514	0.827222687982791
ANP32E	3810.67465611893	0.286999327158784	0.140802267229385	8.93316345503945	0.628061694587673	0.999999965386961
ANPEP	3269.51621395808	1.41488250679029	0.391712679877382	24.7945055772419	0.00976930402745375	0.100177365634307
ANTXR1	4540.72360600154	0.58418231668568	0.235943138141188	17.6700164863291	0.0895600198692472	0.439549930662568
ANTXR2	1323.44941079899	0.954420121137569	0.319905777123268	12.8534124039646	0.303014228442469	0.858887934149515
ANXA1	18857.9649444406	0.889886091405694	0.313025458047492	6.36568629461362	0.847884955849629	0.999999965386961
ANXA11	2280.40351702795	0.489912249997181	0.160186280645818	27.3228589318787	0.00410607436333362	0.0533567197404241
ANXA13	60.3543650246521	0.924990322254893	0.380666365563712	11.4926621964294	0.402958724885386	0.961491668278722
ANXA2	34050.4435144289	0.465312638307941	0.182248028932174	11.5912044889592	0.395141516998295	0.955467531517874
ANXA3	790.347026057201	0.473148225860713	0.225964177265343	13.0160854770842	0.292275370493969	0.844427358769685
ANXA4	3379.73734073418	0.489047376070979	0.23053708393729	9.38549713438795	0.586355333454661	0.999999965386961
ANXA5	4606.62829928956	0.483429811186667	0.296891936243841	14.4833196274162	0.207393027786272	0.713226144840661
ANXA6	1411.94682831438	0.854091627565096	0.293063683744294	26.9255498217791	0.00471570738402596	0.0589553303067744
ANXA7	3230.656885814	0.592584703090331	0.183384195840499	12.9606830399199	0.295902918994306	0.849544447033843
ANXA9	1092.13981594695	0.558965841002852	0.303073135885709	6.44435239887696	0.842133630450648	0.999999965386961
AOAH	67.0453597623093	1.88157083878198	0.63897007865869	12.7410823321186	0.310584485551812	0.867056035530962
AOC1	49.6667930002266	5.10470662247705	1.42541331690684	9.99165035492268	0.531138366075037	0.999999965386961
AOC2	135.475662508717	1.42405992890496	0.334659027653566	20.7376183013697	0.0361935600927404	0.24836996646326
AP1AR	1099.2619947826	0.496242336362575	0.199669125319339	11.9236180853604	0.369411936509223	0.927910701694748
AP1B1	1533.28237419919	0.305831185971104	0.144765576777503	12.3869113694019	0.335273859738107	0.89615851832742
AP1G1	3150.14686744037	0.269728701669365	0.15325991472582	5.15422405570428	0.923467971200389	0.999999965386961
AP1G2	761.432598564472	0.561333191596391	0.174675086420683	18.6552480261601	0.0675696669404684	0.369651350029063
AP1M1	843.298114706221	0.355569180879576	0.170990211645517	4.93670856107343	0.934192924744134	0.999999965386961
AP1M2	959.306679073414	0.485540927930156	0.1476436671885	23.8589059884138	0.0133413408561882	0.125477413106238
AP1S1	1410.60177345542	0.574058845373403	0.217044870249051	5.99685413414466	0.873574072211823	0.999999965386961
AP1S2	1758.52923466005	0.528672158460606	0.189606384178925	8.24663792494323	0.691054817365775	0.999999965386961
AP1S3	361.846746167141	0.500228820555407	0.261732557669129	2.4947352290518	0.995863360599388	0.999999965386961
AP2A1	1428.64565350747	0.202977730570893	0.117616910717389	10.6179557120158	0.475801950243835	0.999999965386961
AP2A2	1650.8648249133	0.223723610045642	0.162248621445777	12.5200006845189	0.325850859443093	0.886386460243265
AP2B1	2503.4288000316	0.370422330572813	0.137079255496731	9.65882673320544	0.561311680194927	0.999999965386961
AP2M1	5614.16907716321	0.431575267794291	0.162578145149137	5.49367413660036	0.904926533921769	0.999999965386961
AP2S1	1501.8291558124	0.496614247485811	0.188099129021415	8.48820490051673	0.669017974461525	0.999999965386961
AP3B1	2270.07015083178	0.410261367153096	0.185618022328325	9.39064035632867	0.585882494283251	0.999999965386961
AP3B2	1.80488134911193	1.13153222325064	1.7875427453524	4.3754754749157	0.957620020804905	NA
AP3D1	3824.0999532399	0.283739649103089	0.115439591881199	6.70351046637973	0.82256051193663	0.999999965386961
AP3M1	2434.03327230832	0.304683871794253	0.173497324389356	1.5877077941683	0.999498686890866	0.999999965386961
AP3S1	1005.0134936355	0.531050996826875	0.290304195872536	5.6761270136862	0.894076723787415	0.999999965386961
AP4B1	777.291841420869	0.421813191392923	0.128563570840915	15.7660220723094	0.150041906621939	0.593233803196003
AP4E1	2537.92744597861	0.382460032131374	0.171363681423051	3.28486132346131	0.98640032063498	0.999999965386961
AP4M1	528.171544124316	0.236335158631133	0.16036594906787	2.19895512914417	0.997665955720795	0.999999965386961
AP4S1	374.566489659106	0.814439841173039	0.281416078175834	5.94472147442008	0.877026998962611	0.999999965386961
AP5B1	528.519469278835	0.468760576397485	0.216322964363313	7.86089419571113	0.725707918418957	0.999999965386961
AP5M1	1506.52131644452	0.358056137986701	0.211007139682411	4.53996729600755	0.95138748150056	0.999999965386961
AP5S1	192.359164299963	0.947373842589707	0.253763227604906	16.7662742014681	0.114981758004697	0.510862730642679
AP5Z1	973.957281887672	0.363568470321475	0.165485686404395	6.17012968476899	0.861774794377143	0.999999965386961
APAF1	977.858701115007	0.523963073133582	0.199086821978774	10.463287789576	0.489257281289296	0.999999965386961
APBA1	138.190811996129	0.832270073030818	0.359458340408742	4.38329459598367	0.957335559006829	0.999999965386961
APBA3	542.857915047097	0.397620410181928	0.161568278957423	4.6510989712869	0.946880102905283	0.999999965386961
APBB1	705.612601393757	0.312179275181772	0.166550253888738	7.2656149267213	0.777183583210597	0.999999965386961
APBB1IP	303.29308164254	1.03327089597618	0.420995449207037	12.0423727173664	0.360466641897268	0.921419340803417
APBB2	1636.12875425231	0.326693956866973	0.181772918480303	7.30166400575973	0.77415446284378	0.999999965386961
APBB3	499.253162612322	0.951914758617113	0.252569178591669	10.6159108608785	0.475978838124812	0.999999965386961
APC	1358.63432070234	0.51496315817328	0.192670821801717	10.5033501884554	0.485757547800128	0.999999965386961
APC2	108.788945650327	0.758643363930457	0.383101200319751	7.59858779096419	0.748746307050514	0.999999965386961
APCDD1	8894.93415027767	0.615534130605785	0.154959045505594	16.7747827308509	0.114716224583841	0.510283447135706
APCDD1L	749.41493052123	1.69208733164697	0.384229282011797	21.234069594041	0.0310255447347732	0.225700801955958
APEH	1215.49615285357	0.314278969253438	0.120874719054567	4.97828277823373	0.932213787784455	0.999999965386961
APEX1	3268.82802083253	0.457217079784554	0.160683281511308	7.17450670111805	0.784780593712949	0.999999965386961
APEX2	319.064984090571	0.395129689049652	0.156797483559125	10.7507998564557	0.464370575230853	0.999999965386961
APH1A	2053.73779896089	0.308408256382714	0.106237459329476	17.1704385327674	0.102934167588613	0.478285371855663
APH1B	365.660687194984	0.545090411413678	0.229636515197631	8.27161003574997	0.688786573533584	0.999999965386961
API5	2873.08156820999	0.368503301269956	0.157390245634893	3.97748429896808	0.970571030634223	0.999999965386961
APIP	645.049682178211	0.674027389855645	0.250417385089711	14.9338607157147	0.185544887697239	0.672651492281921
APLF	327.752053734779	0.880253425705001	0.268086533859535	16.156121797704	0.135433168970733	0.562200647483647
APLN	136.30831819777	2.02903681217621	0.346386505628083	72.196493689087	4.66184784449405e-11	6.94968499120863e-09
APLNR	295.351391837675	1.41625225313642	0.378892316894354	20.3038897269276	0.0413431529417385	0.270642236722398
APLP1	375.246162200638	0.56497457253727	0.158823763490625	28.2139128437404	0.00300177412212102	0.0420892328056892
APLP2	11182.9514192833	0.299106221924388	0.131997623568387	9.18393669204374	0.604918569914288	0.999999965386961
APMAP	2260.78813517925	0.355493371642841	0.0973885015947582	21.1028830023877	0.0323206864028236	0.231865281456348
APOA1	694.590206898764	1.17419775729288	0.320155050796431	52.1382607994558	2.57361157087667e-07	1.55826241512957e-05
APOBEC2	218.402877447104	0.385837210511865	0.234857788000758	5.25625554799643	0.918123729190005	0.999999965386961
APOBEC4	0.0244079520482625	-9.96578428466209	7.25997055193951	-1.66022058163915	1	NA
APOBR	609.386614472024	1.06225383858792	0.430130540557969	7.6194945588685	0.746928838045656	0.999999965386961
APOC2	8.02703558734055	1.89691632368921	0.936624093413773	13.2616765837434	0.276567024409781	0.822718957873874
APOC4	0.912139882794644	1.20493276073353	3.110033444974	4.88200126340227	0.936746095540734	NA
APOD	13837.771575625	1.37673416954309	0.264567109223795	67.8154301348964	3.17170931345502e-10	4.10611157040578e-08
APOE	3013.01476288134	0.750575405177789	0.264719908451862	18.2800036486511	0.075306834873171	0.395140128100286
APOLD1	124.026106759686	1.47211030010415	0.375581569331241	17.6184741405538	0.0908660684495504	0.443541749593865
APOM	152.308713395176	1.04562993052652	0.230716488393491	16.1812010503837	0.134536057737546	0.560454587043325
APOO	485.46119544326	0.546733682835941	0.271175143843096	8.1050158757435	0.703866906818103	0.999999965386961
APOOL	484.727011403992	0.800275701933119	0.261331247114108	7.24999088310472	0.778492411809045	0.999999965386961
APOPT1	637.616967552706	0.382843054408163	0.133963715706841	12.4046083833133	0.334010862707107	0.894848979761804
APP	16157.4276381789	0.258215532071712	0.113943377446142	12.5115273467383	0.326445599633291	0.886897212423566
APPBP2	2786.21468616307	0.258263701175882	0.147129729561889	2.38961296407382	0.996591250874778	0.999999965386961
APPL1	2960.98174504054	0.469284163060703	0.190775086424602	2.74959549415019	0.993638399901144	0.999999965386961
APPL2	1681.02825492957	0.452320051755293	0.125816725115096	18.4003907560871	0.0727431389248853	0.387818880456216
APRT	928.247003830488	0.629061224546791	0.302820005935815	14.6132700714863	0.200894829245278	0.701017724366518
APTX	288.032249242666	0.556823003404406	0.214629101649877	10.1898062590753	0.513399190007257	0.999999965386961
AQP1	8688.38881742113	0.70275766791935	0.26471835480359	9.03166949408342	0.618968976847177	0.999999965386961
AQP11	42.2318775853679	0.951995997202117	0.457059427159329	9.9800104459498	0.532186124236235	0.999999965386961
AQP3	5144.65451950693	1.44702436943372	0.246336226413744	91.3823337294021	8.93103236121489e-15	2.51064078291409e-12
AQP5	232.491340482974	2.6268597984234	0.50483622410205	75.3560333356619	1.15813680905301e-11	1.88345587839216e-09
AQP8	663.757191092505	2.74556970859881	0.62760584413078	22.0304774436461	0.0241381911497705	0.189992838974353
AQP9	1208.10186376869	1.07109294753239	0.326452785303478	6.31765593240567	0.851350980245734	0.999999965386961
AQR	1580.66352880922	0.726272632834093	0.276700317817813	7.24852890944169	0.778614755769077	0.999999965386961
AR	700.340500822967	0.755833362587773	0.238351347160228	33.9315748169349	0.000371127523446766	0.00805187145136215
ARAF	803.830487953144	0.337093535465192	0.114346496009439	12.3513593297471	0.337820373072251	0.898729752502002
ARAP1	1678.52268927146	0.446166624269069	0.193952897440971	5.38090967884744	0.911326374463176	0.999999965386961
ARAP2	2962.09849307598	0.640652314201804	0.23593177417153	16.7598825691858	0.115181571969149	0.511226350545093
ARAP3	487.95279036498	0.710631718413486	0.279943316149786	6.37131058320995	0.847476814439495	0.999999965386961
ARC	278.186036908221	1.09884397239706	0.308432032331115	15.2062643056864	0.173247462760284	0.646041988288207
ARCN1	4382.83946789539	0.385103342432847	0.141772000074299	5.75316133983631	0.889315826861578	0.999999965386961
AREG	403.199922694548	0.537233059314043	0.22703749667004	10.8650536389969	0.454637038114342	0.999999965386961
AREL1	1281.99486914461	0.28228930550196	0.136306813761338	12.0764558087462	0.357923817595319	0.918145436123051
ARF1	6964.95047900179	0.34679798337107	0.132209299687494	3.7628487981234	0.976347772186648	0.999999965386961
ARF3	4219.54721110062	0.377351097084648	0.108686296432243	15.3334949700354	0.167732726157523	0.634366072775461
ARF4	2049.10158736126	0.512516566560383	0.143773609119012	10.6726864289096	0.471077841276247	0.999999965386961
ARF5	937.404321793386	0.344407925127173	0.197600952331579	6.59801578669294	0.830640698851995	0.999999965386961
ARF6	5840.11892094362	0.315693756927401	0.0953017722997574	11.9230205530746	0.369457279590322	0.927910701694748
ARFGAP1	1070.71499160078	0.399835721796676	0.20640838430992	3.30593731744239	0.986033656561434	0.999999965386961
ARFGAP2	2424.19473600574	0.29017254612227	0.135391726079841	6.98153334573198	0.80057699012202	0.999999965386961
ARFGAP3	806.325284692988	1.0155536336946	0.253610930519157	21.7905194342844	0.0260472752036754	0.200531409021097
ARFGEF1	2509.4626004691	0.218451345465809	0.144509572207308	4.81228118446978	0.939915499591122	0.999999965386961
ARFGEF2	1756.37355295043	0.302755682259089	0.147837256290227	6.19893455459231	0.859766303231265	0.999999965386961
ARFGEF3	409.517683351605	1.57695001995933	0.311238434870618	28.2780192064629	0.00293445197459764	0.0413343922377469
ARFIP1	1340.3359353586	0.371858588523975	0.210503700839734	3.76656655081416	0.976254649911513	0.999999965386961
ARFIP2	972.420439781845	0.684449194189314	0.206785555173629	25.0103675886797	0.00908487690466501	0.0948897068630563
ARFRP1	1644.18821236799	0.254066863699656	0.144147307755494	5.15058423242817	0.923654941596332	0.999999965386961
ARG1	60.4053186122165	1.61189743236523	0.388831391717892	33.7870681999665	0.000391853228514479	0.00836321890532313
ARG2	107.944761756678	0.771867647825254	0.358447808499624	6.66548498470513	0.825490328313339	0.999999965386961
ARGLU1	4714.86442644883	0.602289865696159	0.148785995224969	22.2001947974566	0.022867376335298	0.182952021713678
ARHGAP1	1794.69016968564	0.329925079668312	0.136720991075709	9.64477181890874	0.562594548201002	0.999999965386961
ARHGAP10	1368.78032377025	0.294284327891783	0.109880166966971	8.6277900057608	0.656205734591677	0.999999965386961
ARHGAP11A	465.710302183246	0.91283886007215	0.20668128195692	29.507620582613	0.00189239846292136	0.0296485803768842
ARHGAP12	1093.73012241459	0.315024319485617	0.140260720825029	9.24163185919446	0.599599412053029	0.999999965386961
ARHGAP15	48.9489236060537	2.21695526596471	0.65423363000669	13.787053074417	0.245001492453345	0.77299011840579
ARHGAP17	1193.01177554901	0.354772319053358	0.113558489544283	9.07625969839847	0.614853246843522	0.999999965386961
ARHGAP18	924.968275611712	0.635413446796057	0.201183160429441	13.5226961131845	0.260537935605659	0.796513117816815
ARHGAP19	469.79177267348	0.585275057124335	0.168641971727545	13.2866699136205	0.275002486996239	0.819675695109361
ARHGAP20	183.57056502344	0.667191635832794	0.275037613350202	13.2784023186682	0.275519326741142	0.820612532991558
ARHGAP21	2095.25547484878	0.550346785958252	0.173937399883349	20.8282068611026	0.035195196532963	0.244465611498639
ARHGAP22	71.7197406645101	1.28990731452364	0.434342099813559	15.99190914145	0.141431516436699	0.573664743204931
ARHGAP23	1832.88780247849	0.507463971128516	0.19499594064068	12.5125795643589	0.326371706411721	0.886890383331376
ARHGAP24	551.145494228947	0.458792942088157	0.230411596071856	7.66336734969951	0.743103748723472	0.999999965386961
ARHGAP25	283.71286393472	1.09967486515192	0.245675270427505	19.9573735896191	0.0459286965202967	0.288176533098213
ARHGAP26	357.907613591461	0.446030365675834	0.171367048422474	15.0160751599885	0.18176218350485	0.664693597288319
ARHGAP27	1893.75845599914	0.431564689417453	0.151877479141663	16.1367072604128	0.136131077639477	0.563717875797482
ARHGAP28	808.728346480212	0.526998211541521	0.269285469917074	7.57744557978003	0.750580683480912	0.999999965386961
ARHGAP29	2898.46427537128	0.401462989971282	0.163707497447943	6.76742201236459	0.817593228826032	0.999999965386961
ARHGAP30	826.925708784727	0.559917251688189	0.354195027788633	8.54075708426421	0.664199808901495	0.999999965386961
ARHGAP31	1225.09610907068	0.677458068340274	0.23794844546009	11.5047110221257	0.401998369627704	0.960947997756798
ARHGAP32	2005.86534404418	0.420214813940904	0.198822205592663	12.1699452174453	0.351005560355484	0.912084739308675
ARHGAP33	115.797143951335	1.03404172237523	0.3677388158325	8.20720478759961	0.694631270693383	0.999999965386961
ARHGAP35	2520.71181659901	0.517153510258806	0.195731995421461	11.3522695830113	0.414240480452815	0.973643743258344
ARHGAP39	818.285331772446	0.335024628466225	0.210540168974648	5.97406852957192	0.875088857741487	0.999999965386961
ARHGAP4	244.458927092541	0.59681266370374	0.382189015533936	4.04715604572783	0.968517220950952	0.999999965386961
ARHGAP42	1118.71062443993	0.485317347699542	0.209848141690545	11.6343508282836	0.391745644425608	0.951579412254586
ARHGAP44	32.4327984033439	1.07682447015276	0.395740508463667	5.23737064259791	0.91912786400789	0.999999965386961
ARHGAP45	465.498223359741	0.834283118875102	0.373423385602867	13.9321046592146	0.236773206815333	0.759821129111567
ARHGAP5	3982.94355585031	0.325375347480008	0.221515356495493	3.34015564124957	0.985424025186161	0.999999965386961
ARHGAP6	180.332903133801	1.02355535357271	0.276016752772645	16.9221203085674	0.110200451920192	0.498855415892694
ARHGAP8	167.698598111956	1.05708901134552	0.330957996927707	20.1866306057499	0.0428459283981011	0.277160479624534
ARHGAP9	108.531587645787	0.725684857226942	0.408278124470603	9.0408955693884	0.618117357629846	0.999999965386961
ARHGDIA	6250.90520914582	0.283743616397625	0.15474139267293	4.04869798632137	0.968470759073864	0.999999965386961
ARHGDIB	857.161172460615	0.636452001728725	0.38012116874345	15.4042229114345	0.16472904775635	0.626505257392628
ARHGDIG	72.8904497424596	1.3856667114338	0.345140193049052	25.7771288856135	0.00700393381376277	0.0792210327555945
ARHGEF1	1849.6205915238	0.305721957784411	0.198247835553418	2.25495807119449	0.997380923309877	0.999999965386961
ARHGEF10	1369.62163606253	0.46980610007219	0.184928407886035	9.67522858133151	0.55981537302871	0.999999965386961
ARHGEF11	1199.50548206921	0.41702893057415	0.215771577190759	6.88464980384322	0.808346357280496	0.999999965386961
ARHGEF12	5521.81253418255	0.383773442255991	0.21683094036772	6.12785221327636	0.864698718338984	0.999999965386961
ARHGEF15	358.410489969921	0.300630354631226	0.159086425501695	10.6884214949392	0.469723382296227	0.999999965386961
ARHGEF16	251.761328145287	0.565203065417386	0.192618942702983	18.9932030527965	0.0612156257800544	0.347387651926218
ARHGEF17	1254.31361530925	0.544760777624845	0.226479262957247	4.00555146640966	0.969754349188061	0.999999965386961
ARHGEF19	1357.86371035776	0.544355723928109	0.261692799432183	5.78053576932376	0.887598745907889	0.999999965386961
ARHGEF2	1189.86218580425	0.397504160714491	0.189189564379658	8.19608784588871	0.695638325807944	0.999999965386961
ARHGEF25	645.025366906941	0.687851839667247	0.26056387635033	10.2610481540716	0.507069923717021	0.999999965386961
ARHGEF26	527.782745391516	0.654701345532726	0.272864433697311	5.21576077158852	0.920268559391046	0.999999965386961
ARHGEF28	1029.41899478302	0.603609199839127	0.201268550844986	7.91664894773584	0.720750294373968	0.999999965386961
ARHGEF3	743.00796705049	0.559005266974075	0.201599731612264	14.9830930614267	0.183272246657888	0.668228880810435
ARHGEF33	11.5547398233298	1.6487724627122	0.854658349799322	4.73653207947817	0.943251635177513	0.999999965386961
ARHGEF37	2412.53838094601	0.236972262060099	0.276181495579538	0.729432068281426	0.999990045536915	0.999999965386961
ARHGEF38	9.19785599522014	3.26016385074085	1.05441563874352	18.1693713287827	0.0777328933282348	0.40263960908476
ARHGEF39	301.466442606333	0.547375707420111	0.192279770190528	15.1673513284242	0.174962996013653	0.650237259473033
ARHGEF4	977.274483289812	0.861836342777156	0.207008360614592	25.7996710915208	0.00695022995830846	0.0788734862281395
ARHGEF40	1251.98374412455	0.550513786646868	0.292211328906708	5.31069553542744	0.91519121054633	0.999999965386961
ARHGEF5	2529.61753231365	0.3170555136447	0.182429615187226	13.8985094149583	0.238660343089961	0.762891200669955
ARHGEF6	1073.45821963798	0.611549009270668	0.22460241003426	25.7399592402042	0.00709335044030926	0.0798072898595801
ARHGEF7	2454.59622640773	0.622977990064833	0.216588555969443	9.32624113802535	0.591806441279771	0.999999965386961
ARHGEF9	3.45766780566185	1.83213576825474	0.961527168390289	10.8931085362632	0.452261352190042	0.999999965386961
ARID1A	3332.93726240345	0.272718369767376	0.155210981972993	5.69896397274238	0.8926763525501	0.999999965386961
ARID1B	2361.01574962377	0.282978615954175	0.119166289263111	15.675756595918	0.153601523368048	0.600655332107145
ARID2	1108.45167891674	0.396066023228137	0.214609675655645	5.1251094616506	0.924956411490805	0.999999965386961
ARID3A	645.274883167247	0.638353491608426	0.240002563760879	15.7471853470711	0.150779067998242	0.594357071328007
ARID3B	100.674865032194	0.984874142133851	0.292482905230137	12.459810790974	0.330090888898086	0.890184593161423
ARID4A	1526.74806646134	0.313538215050179	0.175429055453206	10.4584993561548	0.489676245615063	0.999999965386961
ARID4B	2163.48215847906	0.238580184423786	0.091606961166435	16.0484420771587	0.139341992498388	0.570175031895048
ARID5A	195.8914055441	0.882467047557737	0.336732179271979	18.5451188780967	0.0697636905928088	0.377267177308218
ARID5B	2239.60762259865	0.59499779799012	0.170338953185976	18.334750237716	0.0741312357223746	0.391717093594223
ARIH1	2652.99402278761	0.270941218703902	0.159063970559241	6.20956536299644	0.859021724817084	0.999999965386961
ARIH2	1508.95700639518	0.308245288410602	0.0839437964448487	24.2408472132926	0.0117551474863305	0.114740968371037
ARIH2OS	60.4514172813658	0.530686927635892	0.276971384173242	8.12537858716013	0.702030509956441	0.999999965386961
ARL1	3121.37797111972	0.522813954762812	0.184479799360969	4.54093854923315	0.951349127541187	0.999999965386961
ARL10	404.750836972723	0.459560747224001	0.18382316697775	10.4538724514834	0.490081209885508	0.999999965386961
ARL11	5.04131709437877	2.47159730856894	1.27905825155386	18.0687007900854	0.0800001409857498	0.408788048381611
ARL13A	1.95112569085071	1.95225971688069	1.31246112884736	6.28110169956449	0.853965315840346	NA
ARL13B	376.342432067117	0.614088769142595	0.191735585284284	15.4337617815386	0.163487587435883	0.624075411360484
ARL14EP	781.392760145345	0.466469758699881	0.220263961446032	4.8182379857563	0.939648408315016	0.999999965386961
ARL14EPL	6.91645323631809	2.00016123110118	0.78284012188593	12.4744651286604	0.329055293174333	0.889576966279091
ARL15	1883.19670429028	0.633234199571662	0.272312764585325	9.5635504541018	0.570019492718955	0.999999965386961
ARL16	582.988209253865	0.339192020762768	0.147658733526336	3.89488073084431	0.972891627183672	0.999999965386961
ARL2	606.330880716771	0.638623278483059	0.189236712739815	21.7125610502153	0.0266970570988523	0.204103365192051
ARL2BP	1824.87225629617	0.327736902297277	0.197007633525106	3.87745003130436	0.973365617511449	0.999999965386961
ARL3	1059.81016181703	0.412713153738982	0.208084262585739	5.18776391542207	0.921733149149815	0.999999965386961
ARL4A	1126.3993087053	0.776605567944081	0.169014043404634	34.613991359016	0.000286857661202327	0.00651822754865981
ARL4C	1348.43314720592	0.266797733095394	0.16031777174565	3.51149993593356	0.982097187541173	0.999999965386961
ARL4D	730.126637103487	0.597323330145696	0.26651333476079	7.63557647231335	0.745528456321504	0.999999965386961
ARL5A	3901.45989016632	0.357453346875423	0.180294932148427	4.21093637091337	0.963335266495327	0.999999965386961
ARL5B	1320.21366887229	0.440495004356077	0.211535087937998	13.5078924542855	0.261428680322021	0.798096235629472
ARL6	233.830320240106	0.713187772743835	0.209718588237398	15.70906224681	0.152280116206083	0.597759450768661
ARL6IP1	4248.87159220598	0.435723987590698	0.150295693489802	12.8419249135889	0.303782610258683	0.859203483959646
ARL6IP4	704.410723315439	0.347060838958051	0.206095940756668	7.04554655038885	0.795383139928614	0.999999965386961
ARL6IP5	1331.32583045591	0.445434338404501	0.134948708088909	24.7987921300291	0.00975524902112518	0.100177365634307
ARL6IP6	927.81137992685	0.478847201446212	0.187167705612497	7.2643626722251	0.777288575124479	0.999999965386961
ARL8A	423.20833470243	0.659441636820989	0.190103995791131	15.9722432337813	0.142164472766655	0.575501439025352
ARL8B	4309.52022691014	0.420363372277735	0.179871136182903	6.77056711111914	0.817347416995225	0.999999965386961
ARMC1	1615.0681465386	0.266023618020084	0.150172828037239	5.84039239620972	0.883798521970837	0.999999965386961
ARMC10	971.032280392413	0.53649916019828	0.196367688643066	8.26072877916408	0.689775241922306	0.999999965386961
ARMC12	124.993860126208	2.31631068963765	0.381776034864871	75.1524192439246	1.26717340329765e-11	2.03940492146792e-09
ARMC2	88.9555554073022	0.818508905583286	0.268263048435501	22.3405728869939	0.0218636200980949	0.177342257333187
ARMC4	10.6854769509564	1.55924679501725	0.756569127297001	9.26336300926971	0.597596916266247	0.999999965386961
ARMC5	534.445893615411	0.361394666092084	0.159341876605984	5.11071463980943	0.925686308607996	0.999999965386961
ARMC6	354.359275665816	0.656986151369031	0.177746492564296	20.0145968192581	0.0451408930068466	0.285837435972296
ARMC7	573.13635349093	0.5388734822103	0.24972047859532	4.5905198687982	0.949366882225022	0.999999965386961
ARMC8	1164.90998973028	0.121961310654218	0.138711399187244	5.62536441787336	0.897156021659352	0.999999965386961
ARMC9	169.666006278726	0.423791782470287	0.225242648880427	12.1417188590007	0.353085537835082	0.913731640738601
ARMCX1	677.144697606095	0.411461053808055	0.167132468608061	16.1080416064661	0.137167035208034	0.56539022178963
ARMCX2	635.198080472488	0.614681933985866	0.189012921788552	15.5757706933607	0.157625134414494	0.609380627703026
ARMCX3	3316.01539148003	0.544708313889919	0.139116214115236	14.8166118019076	0.191047420507013	0.682831899529198
ARMCX5	422.824808467239	0.43599716367804	0.229237876700021	5.54191194678702	0.902116997880127	0.999999965386961
ARMT1	451.16147670799	0.567213119444664	0.229453429125878	5.10439440469753	0.926005520197248	0.999999965386961
ARNT	1650.30227893742	0.246514208541518	0.137723339867687	4.13595392087808	0.96576982217787	0.999999965386961
ARNTL	561.319088308866	0.427761434267062	0.163687663426263	20.5149050097345	0.0387594778439096	0.259248790703981
ARNTL2	37.2128237871274	1.85356298577112	0.452616873850596	25.3392419248892	0.00812899462753194	0.0882307536020814
ARPC1A	4769.65959671142	0.331986294227139	0.137656556302451	6.08774958349079	0.86744559424314	0.999999965386961
ARPC1B	3585.91729187197	0.393264378634617	0.258258555319646	12.5875777637156	0.321133021449212	0.87969062392934
ARPC2	5815.97468083982	0.41345830561137	0.209326250349438	7.71185543445085	0.738859232946802	0.999999965386961
ARPC3	3346.40701991128	0.59150232261226	0.256702031564019	5.82478592294467	0.884795368651063	0.999999965386961
ARPC4	3003.68063722661	0.388348466179434	0.189141423272956	6.7953376946449	0.815406983473692	0.999999965386961
ARPC5	3996.82730491244	0.500620991555578	0.192725844014493	11.6878378463621	0.387558884753857	0.945849402726826
ARPC5L	1902.39628686538	0.276598724487196	0.189185595803016	6.59855370254178	0.830599882610599	0.999999965386961
ARPIN	1015.24337720311	0.322708157897542	0.128826206022554	14.3317927783439	0.215174626782912	0.726154399902958
ARPP19	3597.67806956231	0.342800618299896	0.179983480395624	2.82566889097086	0.992834848949632	0.999999965386961
ARR3	2.02911709978572	2.57675402490735	1.36362408935322	12.918067700856	0.298714200438094	NA
ARRB1	1320.44965476834	0.358237308853695	0.296582539013279	8.32516023815771	0.683914253793378	0.999999965386961
ARRB2	297.868286804548	0.404816355441026	0.244326868148874	8.47354414980163	0.670360796910988	0.999999965386961
ARRDC1	924.229198369254	0.381734913738675	0.178594225626318	6.24198756779049	0.856739910971853	0.999999965386961
ARRDC2	819.803318242241	0.397414786089693	0.202979626253834	9.12511877090594	0.610344396167872	0.999999965386961
ARRDC3	5219.43662115216	0.572124093418464	0.225830340756883	5.39468029874456	0.910557533411254	0.999999965386961
ARRDC4	3201.17578673209	0.590821982938198	0.203744047793548	13.6079748704564	0.255449528161863	0.788103317007155
ARRDC5	107.562700498718	1.09213097714176	0.410274074055601	16.1880237017353	0.134292866512348	0.560005161098482
ARSA	462.932679431202	0.887390518188238	0.245177234970386	18.0492870725417	0.0804440025880615	0.410310285880734
ARSB	682.797915520719	0.649325946945181	0.295603457513271	7.88211560228279	0.723823244295995	0.999999965386961
ARSE	149.746430203272	1.12449727215863	0.296310317557169	43.6469150252492	8.37677043414737e-06	0.000331666174251815
ARSG	144.936604005969	0.982258037523761	0.430743951308507	4.3290368724987	0.959285326082077	0.999999965386961
ARSI	48.5912010172303	1.06008257844053	0.525824790246882	4.00740773981562	0.969699828989668	0.999999965386961
ARSJ	279.064680496291	1.09980395207915	0.219940658609161	33.0136979000733	0.000523480388591946	0.0105560208713129
ARSK	173.29747057595	1.78655109689301	0.376245262731779	28.5798340533167	0.00263655833376475	0.0382330102371575
ART3	16.8206678273542	1.75564065248234	0.857993023664856	4.69469802253315	0.945046154433644	0.999999965386961
ART4	8.9948015096835	1.6246804622028	0.813885537696465	11.0705165961474	0.437374673623765	0.994503079298605
ARTN	24.3625974723782	2.25242203678006	0.60329065801673	9.19967512528524	0.603467233717168	0.999999965386961
ARV1	665.738260604688	0.319112063613841	0.169653398599547	7.30206340833564	0.774120830176461	0.999999965386961
ARVCF	302.357047297862	0.519835741045244	0.250910807036684	5.15892139274115	0.92322630295474	0.999999965386961
AS3MT	275.622173099776	0.573895262646555	0.178079636587715	17.5360556633078	0.0929889933656814	0.450809906738083
ASAH1	2409.32087093283	0.606803768628789	0.153528162084636	30.1907242432125	0.0014788928283656	0.0243936739954554
ASAP1	588.347100588681	0.504553905128009	0.236182793818874	6.06285106940885	0.869137870059114	0.999999965386961
ASAP2	1188.94434102875	0.379157915070852	0.12638101892652	14.5312947415352	0.20497526445284	0.707511321926053
ASAP3	1840.22316891324	0.40687325053931	0.184849118936892	12.1376271891793	0.353387681701977	0.913731640738601
ASB1	1181.66417851337	0.541519959967936	0.295235566190385	3.63269978988973	0.979457669874197	0.999999965386961
ASB11	298.025833762812	0.719802124313675	0.250617782850762	16.9174366328503	0.110341626955544	0.499217960165189
ASB12	40.2287698558378	0.794942229801036	0.362890540068185	6.42412882403875	0.843620921334443	0.999999965386961
ASB13	777.341861329411	0.831995109841215	0.237687872190547	13.9648359429419	0.234945362360197	0.757001461590572
ASB14	30.9221585607282	1.63587520739408	0.647190531664804	9.91243752433661	0.538280291141169	0.999999965386961
ASB2	85.7176508679976	1.23253669153804	0.441915869709123	22.1679736268034	0.0231037478580831	0.184343557154147
ASB3	735.733962004831	0.275418988543973	0.182591911651784	2.55444055472503	0.995402890106361	0.999999965386961
ASB6	539.410659576625	0.356313370958921	0.172773627203443	4.78736082323206	0.941025382969211	0.999999965386961
ASB7	571.949869386204	0.559714727361525	0.188738464539988	6.60040918033616	0.830459061105721	0.999999965386961
ASB8	1025.00251795306	0.484425087416261	0.12708222767483	14.7067861552527	0.196317742857278	0.691694964538622
ASB9	53.8831101662025	1.24760151604194	0.303559199603206	21.1549973688948	0.0318003335744692	0.228967056011125
ASCC1	856.555859325278	1.30565682032806	0.210684399846678	76.1277330911377	8.23264319693776e-12	1.40871263329862e-09
ASCC2	1487.50030342881	0.324334807362314	0.111438027680326	14.3532900738452	0.214057155425958	0.724295653053446
ASCC3	1832.83108408172	0.766490730959229	0.214948465334621	22.0252649109759	0.0241782420250331	0.189992838974353
ASCL2	406.013637911022	1.03818115533274	0.290440960595114	11.7922738222215	0.379458239236815	0.937709309519282
ASCL3	0.445878538785233	0.431987316911192	5.11658015584899	2.51245047022107	0.995730401155468	NA
ASCL4	21.4116024526182	1.18766350657441	0.463474015021729	6.19748923251925	0.859867395318705	0.999999965386961
ASF1A	493.876960258906	0.698923069556928	0.220099301642098	7.42622370465887	0.76359181034398	0.999999965386961
ASF1B	192.371285788489	1.3071305657292	0.219149399987506	33.6485336181269	0.000412780899009113	0.00872470733695093
ASGR1	39.3530647607832	1.97923430210099	0.784138660253865	24.2916631372386	0.011558066643282	0.113266750700449
ASGR2	18.2145307313931	2.10625111806478	1.18684747379002	17.7243576756126	0.0882008191478724	0.434991408318755
ASH1L	3389.89144454477	0.391804004751031	0.211821422091876	8.51884880964064	0.666209309869299	0.999999965386961
ASH2L	781.416111065326	0.305904000506206	0.120327587005251	5.41840055588824	0.909224873245008	0.999999965386961
ASIC1	14.2410522350743	1.47745130090423	0.64190588213025	12.2227153592078	0.347137460441508	0.908688244749593
ASIC4	282.756073406266	0.970034798288608	0.485745487426478	5.53360874891865	0.90260364920585	0.999999965386961
ASIP	2671.5539436232	0.381602528339734	0.384846533467967	2.5706712890227	0.995271549561419	0.999999965386961
ASL	1186.73032411518	0.871057042216202	0.27430684347172	19.6446554244566	0.0504587204566322	0.306977845235499
ASMT	6.02486042201034	1.61754727293558	0.943291232078161	7.33738345919468	0.771140487131614	0.999999965386961
ASMTL	640.695978742441	0.174208770178214	0.174821196215822	7.36874538576154	0.768484109892937	0.999999965386961
ASNA1	1842.14151053074	0.413675508916249	0.15234137290574	8.21277349285663	0.694126612202082	0.999999965386961
ASNS	1516.52596745261	1.44394594604839	0.241615083180936	44.8586694044445	5.13785281751627e-06	0.00021284772156439
ASNSD1	994.884924764294	0.560905118937821	0.216165663324261	6.86527797339153	0.809886233769768	0.999999965386961
ASPA	416.63030886453	0.955196965104147	0.389740382621361	20.0220513860264	0.0450391741180385	0.285620647210687
ASPG	120.890204020311	1.03507810334837	0.320891446882693	9.94043876795064	0.535752583812046	0.999999965386961
ASPH	1587.07807012032	0.36881527752648	0.183727150006579	15.1230691310258	0.176931817987141	0.653682968897529
ASPHD1	0.268050073770978	0.389828857113777	7.21300554461737	0.937986840985516	0.999963633417285	NA
ASPHD2	143.437666967204	1.12727134348599	0.280412756487408	28.2954169102226	0.00291643385187592	0.0412577896025983
ASPM	621.86067743318	1.04447587906918	0.258002101764733	34.6704453809081	0.000280791075798918	0.00639514674718878
ASPN	1538.53802359032	1.13778175617689	0.360625249271823	18.0297228603325	0.0808934956574873	0.41111973918769
ASPRV1	18138.0788272681	0.641449251914314	0.197576880471576	15.7841708058834	0.149334481977397	0.592049679723735
ASPSCR1	926.858410287671	0.461954363619097	0.151667423749802	11.245752633451	0.422910593070071	0.980909317589917
ASRGL1	814.430780082284	0.76621851186567	0.558988218680174	17.0853389372929	0.105376498954526	0.48539296498763
ASS1	1176.31762859186	0.926492726080911	0.236210856174373	33.2900974170616	0.000472118858879439	0.00972812031940273
ASTE1	251.179632685484	0.465610122978195	0.282198190149526	3.66574305211697	0.978695507115836	0.999999965386961
ASTN2	91.2603126882985	1.19499862200257	0.34553893570882	19.2490393512803	0.0567670583537735	0.332063666553375
ASUN	599.107693370937	0.444626453207254	0.177175024501445	7.10562491234361	0.790466385174558	0.999999965386961
ASXL1	2068.45115709783	0.321285744976914	0.168539986864638	4.37920091750527	0.957484634514219	0.999999965386961
ASXL2	1729.49835905486	0.483778427513656	0.20330023498069	7.59208631713545	0.749310782771932	0.999999965386961
ASZ1	0.213299396193175	-0.1524088290885	7.25997055178526	1.34820279353668	0.99977466558498	NA
ATAD1	1724.16533391813	0.569013396866336	0.195674962734038	3.89386261112838	0.972919462318671	0.999999965386961
ATAD2	668.423922749028	0.430140995213739	0.228942446235095	7.37357461451461	0.768074245471695	0.999999965386961
ATAD2B	1585.56253420211	0.526188620331418	0.257911256033635	9.53509224925489	0.572625361545847	0.999999965386961
ATAD5	290.99215545218	0.801058617779944	0.261076090636076	15.532255674323	0.159402997663339	0.613122007040497
ATAT1	342.804845086784	0.63957647988666	0.253942589856221	6.10482061980872	0.866279482884172	0.999999965386961
ATE1	873.436443316653	0.379988660236485	0.145658002362221	17.4677710006668	0.094780415154662	0.456123504380885
ATF1	1008.21317684265	0.56791864388532	0.259578874509811	4.75914160951271	0.942267576108524	0.999999965386961
ATF2	1264.80338957292	0.426616203276021	0.187102119998332	6.05166843362372	0.869894612237457	0.999999965386961
ATF3	377.989515991632	0.946886465429063	0.289574036345376	27.6508479267392	0.00366050606300579	0.0489344010243396
ATF4	11300.75257958	0.348437428844601	0.13452458633476	10.6218032152489	0.475469200399778	0.999999965386961
ATF5	930.783933007483	0.552091050662726	0.252306003606599	5.56451610564642	0.900785774615293	0.999999965386961
ATF6	1619.07311884431	0.441330962056769	0.179504773069191	10.4947979813402	0.486503809152912	0.999999965386961
ATF6B	1360.30794753985	0.297109959938724	0.166734111136474	6.04119264158317	0.870601654048967	0.999999965386961
ATF7	1832.42041244229	0.445086972567709	0.199320103784605	10.7392702671517	0.465357928493713	0.999999965386961
ATF7IP	2093.96216146819	0.359295128184374	0.167403612456096	5.5757076087292	0.900123222926458	0.999999965386961
ATG10	282.053868238185	0.444387286792334	0.170361512812677	13.0786405012969	0.288216606834462	0.840226131746451
ATG101	802.881186243359	0.321662815000872	0.174608786189938	5.0425934868378	0.929086283949704	0.999999965386961
ATG12	1331.54352793236	0.475986876269801	0.186961033972658	5.67978030879397	0.893853328336531	0.999999965386961
ATG13	1685.22747034635	0.380196408745965	0.132267098147629	10.5923799074924	0.478016335483248	0.999999965386961
ATG14	931.620015988866	0.329221384326187	0.14293314417728	7.60617615318631	0.748087036680935	0.999999965386961
ATG16L1	1245.3128193344	0.499200375337772	0.14033605283626	18.9304940629186	0.0623526298411229	0.351871250362379
ATG16L2	281.330833559766	0.552592623557398	0.283555691026801	10.2875289571326	0.504724299597713	0.999999965386961
ATG2A	1852.56179363435	0.476865834547379	0.200805094825263	17.0624084374152	0.106043063008984	0.487550325675419
ATG2B	1515.56804538547	0.382760820158235	0.205025113266622	4.53687925141173	0.951509304201009	0.999999965386961
ATG3	1271.17775497474	0.272418200658386	0.176585052360261	1.94217873855831	0.998689011770762	0.999999965386961
ATG4A	368.571562822643	0.488921752856794	0.170868644464083	12.1121017378208	0.355276180331506	0.914954294581608
ATG4B	1558.75753294723	0.332244231373546	0.154968088135277	8.01706444107265	0.71177440713901	0.999999965386961
ATG4C	471.19952130466	0.624170239068807	0.257388119521602	4.61039829080738	0.948558738591075	0.999999965386961
ATG4D	970.63734364783	0.342026049502651	0.14644384732497	9.86274499050637	0.54277406841098	0.999999965386961
ATG5	1120.94418479394	0.473260480250753	0.217711996371124	3.57239784489616	0.980801315019011	0.999999965386961
ATG7	506.992570884334	0.317589430377071	0.169207982284246	9.75089314594612	0.552924025996134	0.999999965386961
ATG9A	849.869408324782	0.397586415830531	0.17005891368711	6.41101872883047	0.844581857115624	0.999999965386961
ATG9B	2538.35959403973	0.63247634786702	0.286295464704631	13.8787238594615	0.239776993507873	0.764862247779813
ATIC	723.496738039596	0.379629889049436	0.171030920029564	4.4011270019966	0.956682419017788	0.999999965386961
ATL1	115.140338394622	0.753287768903599	0.358442230588433	4.31255840688254	0.959866336164933	0.999999965386961
ATL2	4316.32603065199	0.323383021477176	0.208267718063581	2.24146252544233	0.997451839719607	0.999999965386961
ATL3	919.55988179579	0.624658843439965	0.324400905500121	4.18813307955548	0.964086827750055	0.999999965386961
ATM	1068.98076499276	0.471121552231876	0.274265577052943	6.64348102051275	0.827176844000178	0.999999965386961
ATMIN	1013.72224264897	0.273495494296129	0.164542803815659	4.86510980185324	0.937522651812713	0.999999965386961
ATN1	1831.58729164705	0.486532963267532	0.213688792728375	4.83191126965272	0.93903271054371	0.999999965386961
ATOH8	183.818614269064	1.11517066564892	0.292105046296522	44.9957960915041	4.86044240577415e-06	0.000203372967951877
ATOX1	2099.52891827199	0.614853823433732	0.239769138121497	10.8630326112894	0.454808400380329	0.999999965386961
ATP10A	274.260782658351	0.71266572226661	0.286211970721574	8.71112394851394	0.648537284832069	0.999999965386961
ATP10B	746.976548284052	0.622001696269041	0.275822633649388	8.19063742587923	0.696131865287794	0.999999965386961
ATP10D	1057.57906974967	0.404918649557814	0.191630169295514	10.960593513754	0.446570530921333	0.999999965386961
ATP11A	1463.70717836997	0.447507872180056	0.176991215222229	8.11468227437314	0.702995403649241	0.999999965386961
ATP11B	2704.10651842515	0.305964725260231	0.174922215091388	5.99199438699122	0.873897876699262	0.999999965386961
ATP11C	684.680842241533	0.623693409288853	0.208985862740603	10.273434465049	0.505972286135743	0.999999965386961
ATP12A	295.15253381755	4.31908379836456	0.990668326764157	40.594839475547	2.82917162068421e-05	0.000923257697376847
ATP13A1	1234.50571549235	0.331386980675208	0.141697781521965	7.2762231694623	0.776293535180433	0.999999965386961
ATP13A3	2194.96224077145	0.394917363647661	0.163736455070444	9.18112264503617	0.605178094882217	0.999999965386961
ATP13A4	809.093749022843	1.53180383107951	0.297680752487379	42.2889583701423	1.44338650959596e-05	0.0005302313427734
ATP13A5	385.087315392104	2.13107790277385	0.359261356983351	75.1389128806207	1.27475762445652e-11	2.03940492146792e-09
ATP1A1	9465.86334018174	0.540764687561003	0.116904948723505	36.4315496035008	0.000143421662568585	0.00370374209452049
ATP1B1	2050.46231671091	0.668849374115991	0.216085547932575	13.1081575058151	0.286315130809402	0.837379999661891
ATP1B2	335.279114118528	0.660239804351679	0.2018341338166	33.5811394254242	0.000423352285062745	0.00890159165988306
ATP1B3	2278.75752871463	0.545915073651997	0.190218669171892	12.5963938133625	0.320520866573351	0.879196605891181
ATP23	433.017264675481	0.611670158749115	0.213561113143302	9.12974076775299	0.609917934560162	0.999999965386961
ATP2A1	10.2140303678333	1.16257004212143	0.645083665607112	10.4418706468499	0.491132260051506	0.999999965386961
ATP2A2	4785.83454229156	0.28444268410658	0.141697820711753	11.7612917136881	0.381851075654441	0.940198381722735
ATP2A3	309.442190886404	1.0387063966138	0.403041635095321	12.2129831718739	0.347848826057735	0.909630458360679
ATP2B1	3334.82942472442	0.331210957989775	0.135519115835883	10.9332344426233	0.448873561536222	0.999999965386961
ATP2B2	545.667280649811	1.93891441203332	0.608136337875242	5.90616844186354	0.87955097657698	0.999999965386961
ATP2B4	209.888837425916	0.778955014514066	0.382100115084507	8.47679896503541	0.670062730727589	0.999999965386961
ATP2C1	3344.99230833472	0.355533608526197	0.148340187502692	3.72051078551226	0.977391335141968	0.999999965386961
ATP2C2	673.667633627238	0.468702246038384	0.319168426735385	9.28590674609507	0.595520195977524	0.999999965386961
ATP4B	14.913258717044	1.37678587841317	0.834833826637228	9.08832007296914	0.613740173358235	0.999999965386961
ATP5A1	12763.7784026886	0.484645549973692	0.155753300961051	14.7896182695295	0.192332327341302	0.685089186953395
ATP5B	10966.0529727604	0.497860857161701	0.121788245299094	17.3347163889905	0.0983572701922191	0.467048275139777
ATP5C1	4346.83249019761	0.440742761913374	0.244121001882323	6.33696719204943	0.84996161431682	0.999999965386961
ATP5D	3824.11352951818	0.379145558037	0.179959846381115	6.89771921202964	0.807304868232199	0.999999965386961
ATP5E	7142.98882105627	0.352380352641803	0.306787747245725	5.46879222353652	0.906358982665671	0.999999965386961
ATP5F1	7097.90916510674	0.639110537782246	0.288069851481433	6.83647438515902	0.812167271415431	0.999999965386961
ATP5G1	1202.63730167045	0.651592803769504	0.198669692205848	16.9977825007522	0.107941196550077	0.492822938680373
ATP5G2	6473.46397325698	0.363879903714193	0.16720785990331	6.48439747261796	0.839171026591085	0.999999965386961
ATP5G3	3952.35336458078	0.451174071880812	0.198352330713856	10.9342189319159	0.448790592197002	0.999999965386961
ATP5H	4353.12088836797	0.409083881732874	0.164838687847321	11.0694421972574	0.437464104807842	0.994503079298605
ATP5I	6482.89605336481	0.570993503932704	0.30679452222187	5.11234118434481	0.925604033521661	0.999999965386961
ATP5J	2475.19770452663	0.404197782670111	0.216311345944056	7.49255686536833	0.757908749225066	0.999999965386961
ATP5J2	3902.09507547088	0.345491350274691	0.22700016097784	8.42681926481657	0.674636303917117	0.999999965386961
ATP5L	4366.06480115255	0.547736487237535	0.279137515345773	5.64697543661885	0.895850744747495	0.999999965386961
ATP5O	5291.56311946329	0.617474674957159	0.301048407921524	5.41728295573353	0.909287898373889	0.999999965386961
ATP5S	498.30198055246	0.540204465827844	0.255624968669344	2.32649256009705	0.996980456268756	0.999999965386961
ATP5SL	671.088598770117	0.369260033180688	0.126259435191519	11.0587384322243	0.438355558494901	0.995581261865673
ATP6	0	-9.96578428466209	NA	NA	NA	NA
ATP6AP1	2083.14763221769	0.21472506343172	0.0929824787705096	9.60101396931589	0.566592369459112	0.999999965386961
ATP6AP1L	1.732102344318	1.96654635144531	2.31581919540852	8.86026151843862	0.634789110670761	NA
ATP6AP2	3587.76152033483	0.307761219494673	0.143380657741086	3.51151782268948	0.982096815819963	0.999999965386961
ATP6V0A1	2506.23960241078	0.375160277768079	0.124930571992959	16.7910867525715	0.11420887093686	0.509383989640874
ATP6V0A2	1533.78917402212	0.254422117199292	0.159218376546291	5.35733967891912	0.912634087667287	0.999999965386961
ATP6V0A4	392.113961943243	1.04114902407636	0.379307365135898	6.56194139312538	0.83336880717845	0.999999965386961
ATP6V0B	2672.26774713347	0.345525476020847	0.168236194233915	4.54122700138169	0.95133773328913	0.999999965386961
ATP6V0C	3446.66044494955	0.265648126459093	0.162151815297642	3.79403193310065	0.975559221596566	0.999999965386961
ATP6V0D1	3227.79201007895	0.523711991227983	0.163277986488883	10.2690464029678	0.50636104697894	0.999999965386961
ATP6V0D2	150.051681918539	1.55116195113455	0.475389836226982	28.4580694107003	0.00275305640057589	0.0393139650584415
ATP6V0E1	6596.23995867165	0.466321385561434	0.226372081449932	5.98165604711767	0.874585405619879	0.999999965386961
ATP6V0E2	217.498288755508	0.597356619882838	0.247817204562283	9.89450932141921	0.53990040957677	0.999999965386961
ATP6V1A	3619.1239143503	0.515407600197824	0.202139618668938	4.66915256619893	0.946125188132678	0.999999965386961
ATP6V1B1	5491.72498518004	0.336377037573563	0.196438713944947	4.80877836909724	0.940072236153459	0.999999965386961
ATP6V1B2	2545.67936090019	0.190893269709307	0.109832069203323	5.59497483868688	0.898977236542688	0.999999965386961
ATP6V1C1	1375.81191219595	0.395227461309787	0.163671737379614	7.68065334632018	0.741592598156964	0.999999965386961
ATP6V1C2	4506.55422197031	0.776641826764431	0.274431086882137	12.389150227464	0.335113908225004	0.89606788348517
ATP6V1D	2748.47367670318	0.430586200760974	0.179603215450356	7.2482425294603	0.778638718691715	0.999999965386961
ATP6V1E1	5126.09837068512	0.49103747791856	0.210988453234676	6.24229219924791	0.856718393547362	0.999999965386961
ATP6V1E2	12.1908336644683	1.28506258670317	0.627830101964155	9.97278894477586	0.532836464011437	0.999999965386961
ATP6V1F	3338.84421282173	0.351966257069132	0.222969390813273	5.52995685601445	0.90281728693082	0.999999965386961
ATP6V1G1	3823.76123999816	0.357036096521739	0.222290265445176	3.36685945799377	0.984935825535336	0.999999965386961
ATP6V1G2	10.1922365755434	2.28340872689176	0.825663375946655	9.73020713565714	0.554806143516207	0.999999965386961
ATP6V1H	1792.55505689433	0.373164745374175	0.129116698026053	6.74681362881432	0.819200757989976	0.999999965386961
ATP7A	925.997454750577	0.680295664931645	0.43719247934431	5.05433749735516	0.928506519552719	0.999999965386961
ATP8	64.4493467128828	3.33284958144815	2.02884786695603	4.02156761580392	0.969281865110379	0.999999965386961
ATP8A1	951.962473523916	0.641911532711503	0.220758045643598	12.7456753977634	0.310272473029678	0.866402969246206
ATP8B1	1097.30081758073	0.369869213973381	0.166017419094257	9.03404710442101	0.618749508414218	0.999999965386961
ATP8B2	1945.17419429014	0.39449002208427	0.206226504100881	4.79590940226086	0.940646016743336	0.999999965386961
ATP8B3	180.593458116755	0.851631228133573	0.204756790355485	33.8909511501096	0.000376843256517167	0.00813602164543037
ATP8B4	107.876271700844	1.46114918674485	0.539133381357882	5.018057517947	0.93028894244061	0.999999965386961
ATP9A	3137.21025688655	0.373862153748001	0.19151963280381	7.26046926262381	0.777614907216082	0.999999965386961
ATP9B	1130.34730489931	0.289927085706529	0.101649612988009	16.8086496685868	0.113664485498067	0.507784476730252
ATPAF1	980.987013661504	0.294293034068467	0.118896319890483	10.5430562209724	0.482298830987867	0.999999965386961
ATPAF2	278.895407744959	0.389152475836647	0.199608777329513	8.09689901261032	0.704598348023512	0.999999965386961
ATPIF1	2803.23462062884	0.350672520510631	0.241809172775433	5.42985694913705	0.908577467683551	0.999999965386961
ATR	545.009123952481	0.372043282337159	0.19882431854521	3.08234458744568	0.989592249875928	0.999999965386961
ATRAID	1268.44680575351	0.476858146997453	0.158518171939299	12.8026167950331	0.306421868529592	0.861767996641919
ATRIP	268.134110350139	0.392760129877669	0.261048132986851	4.84488421774603	0.938445181627188	0.999999965386961
ATRN	1744.69553091439	0.378384486199359	0.158852840004479	7.6625475179012	0.74317536253853	0.999999965386961
ATRNL1	373.106947964875	1.23957462025788	0.33115850877373	13.5546882381763	0.258620472697363	0.792576493028922
ATRX	1358.87109049954	0.45469713232608	0.16790976675971	10.278784947747	0.505498402594518	0.999999965386961
ATXN1	1214.13363132337	0.430826857980302	0.199896836984226	9.42370596114057	0.582843861935866	0.999999965386961
ATXN10	3066.56128701698	0.309682370536597	0.114582850852798	7.49782549420127	0.757455707754625	0.999999965386961
ATXN1L	1388.0584493862	0.468038223395533	0.209533346376391	6.06943711736255	0.868691223602896	0.999999965386961
ATXN2	941.059925995545	0.206850745448877	0.116935788607716	5.30936343800698	0.915263636160761	0.999999965386961
ATXN2L	2468.16841113492	0.418741852613483	0.217030128475797	2.73648992570384	0.993770025000454	0.999999965386961
ATXN3	2110.72877272501	0.336362308776364	0.211603880812702	3.78931611833445	0.975679565190385	0.999999965386961
ATXN7	1144.09512629334	0.461350763533724	0.245984849791682	5.18311750952472	0.921974765753866	0.999999965386961
ATXN7L1	382.143118836915	0.477974644899656	0.182398928015055	15.9933614676354	0.141377512434531	0.573664743204931
ATXN7L2	125.647704990225	0.307280861143626	0.252062992967475	3.26943475804563	0.986664474882323	0.999999965386961
ATXN7L3	1516.66473328615	0.482605124089053	0.169958263948716	5.66279434471835	0.894889976088337	0.999999965386961
ATXN7L3B	4156.46082947184	0.22114197289255	0.0982771602615841	8.63083780416787	0.655925497264201	0.999999965386961
AUH	375.696440978065	0.557708469025367	0.133423183068	36.8111453678119	0.000123934818882939	0.00326041359088032
AUNIP	3.3592965010622	3.14403459296724	1.57740384950352	15.2030170764515	0.173390101719443	0.646282031612093
AUP1	1862.45666078426	0.284757083339887	0.148527703171009	9.94337065948446	0.535488110316426	0.999999965386961
AURKA	177.383943226394	0.897802606133702	0.277229327023682	18.0907584907848	0.0794984466294772	0.407007102532892
AURKAIP1	790.893804062006	0.321501869567905	0.19717431028548	8.5187771855812	0.666215877463828	0.999999965386961
AURKB	258.962276673803	0.98563218168038	0.202198008931804	41.2612098114845	2.17290551198692e-05	0.000744920464544924
AURKC	145.031687872987	1.06296834039947	0.432655174513378	4.42779151711056	0.955694381108305	0.999999965386961
AUTS2	458.054734767278	0.743029872680902	0.222001684870741	26.1843747101535	0.00609209205936701	0.0712300579585407
AVEN	628.1213872805	0.39411981481506	0.160082265440349	12.1212643683865	0.354597569194372	0.914725203500711
AVIL	45.8778768571596	0.862626868837774	0.338102695848069	16.4882445133552	0.123950876566971	0.533370948848644
AVL9	1209.38454533318	0.294545182973702	0.183743499679451	10.0856896826311	0.522696190842669	0.999999965386961
AVPI1	901.215149978873	0.627715395186435	0.262869891928588	7.63299895998642	0.745753037233319	0.999999965386961
AVPR1A	103.273552958328	0.882873232475918	0.354183905231467	14.8897715702668	0.187599066803002	0.676382867500865
AVPR2	10.2375398562586	2.2572259263533	0.858854164098213	5.34720555713375	0.913193143375181	0.999999965386961
AWAT1	359.850865914113	1.60385972918871	0.379176785060974	39.9542961516341	3.64247489277434e-05	0.00115313443657475
AXDND1	93.7092570757955	3.2602357363935	0.57046052131802	67.1449921318018	4.24695380030635e-10	5.22322230515177e-08
AXIN1	1067.92510560279	0.475358290065571	0.168603137448875	6.16658417904171	0.862021101787224	0.999999965386961
AXIN2	928.936878683488	0.395920814777755	0.190439486865836	11.6961271245391	0.386912323148192	0.945209273111127
AXL	2059.56562607355	1.0233625631846	0.235309714038678	29.6996236650449	0.00176604976194923	0.0280940397862869
AZGP1	117.973597386181	2.83731444551141	0.656295838992395	37.646881847368	8.97281424457831e-05	0.0024938847274691
AZI2	1129.4601941509	0.465919095354765	0.182641813185216	9.84115103232313	0.544729921861475	0.999999965386961
AZIN1	2742.81937520966	0.466439869720285	0.175663418486059	14.2843788798809	0.217655131070346	0.729963312055836
AZIN2	25.2092328571085	1.1199139105206	0.523740986005742	6.8548469923353	0.810713482204079	0.999999965386961
AZU1	0.742846502690665	1.78273544391833	2.83371968147923	7.59887011416606	0.748721787297471	NA
B2M	13057.9692061238	1.07985196076328	0.306484961160038	32.9605108255265	0.000533970523940643	0.0107000732893116
B3GALNT1	106.682096691227	1.05686067223357	0.342293160315527	10.5796155199341	0.479123089285203	0.999999965386961
B3GALNT2	869.042503131748	0.219973555799095	0.0881554351633339	13.2548013507931	0.276998505686253	0.823375572710162
B3GALT2	71.1138458826111	1.36652257289361	0.501904100279948	9.11816847364548	0.610985710280042	0.999999965386961
B3GALT4	436.642051706406	0.733029671837955	0.196526934216625	23.2994646544479	0.0160325819503225	0.143014119500655
B3GALT6	157.113693503319	0.335991128020994	0.251615333697747	4.07071855904275	0.967802445949985	0.999999965386961
B3GAT1	92.3644569082687	0.481696140820387	0.367617936446453	5.77263493163156	0.888095683827442	0.999999965386961
B3GAT2	11.0870006198577	1.24630383618892	0.634171009576947	12.406855811345	0.333850687849988	0.894682345175686
B3GAT3	694.644166576077	0.531568809378872	0.188552916814609	6.32321042443357	0.850951938125042	0.999999965386961
B3GLCT	495.216059034756	0.713162421440172	0.184504315673933	24.0104141346027	0.0126893692229404	0.121273145978155
B3GNT2	1470.16380783164	0.421211061508495	0.193388041962799	7.59902722858214	0.748708141643495	0.999999965386961
B3GNT3	82.0269582740286	1.25385724681846	0.490364217805776	21.3867955424342	0.0295781543754105	0.219655610497829
B3GNT4	6.76460834619835	2.70819289203533	1.17765623349899	8.02792590927515	0.710800098510134	0.999999965386961
B3GNT5	357.251672507316	0.419584339617035	0.207624559204356	5.45218659194688	0.90730859266318	0.999999965386961
B3GNT6	19.018984946106	1.8299041166786	0.725705005679772	8.74824220914587	0.645118033998425	0.999999965386961
B3GNT8	371.812346243991	0.429311194702838	0.256831176273986	6.34654630874019	0.849270337907239	0.999999965386961
B3GNT9	179.639339854576	0.802569126124293	0.371454700345393	13.9677432230931	0.234783521348546	0.756949132423837
B3GNTL1	79.0327387060469	0.933723070169247	0.40329557232673	10.9863401086498	0.444408375000868	0.999999965386961
B4GALNT1	52.7616461803693	1.11462111507214	0.61383145214043	9.4092121159693	0.584175535815469	0.999999965386961
B4GALNT3	1847.4644454117	0.74549141402451	0.221446715920998	14.5351401467125	0.204782423055648	0.707291518872346
B4GALNT4	48.0122867854095	1.30959109993637	0.42802982132739	18.1550417621747	0.0780521185548035	0.403231711452198
B4GALT1	1121.72407847169	0.722475059701827	0.228628412767849	7.52846207831141	0.754816603064117	0.999999965386961
B4GALT2	1458.90414634272	0.37410361679316	0.135408038478709	6.90014455028182	0.807111366481618	0.999999965386961
B4GALT3	581.64547562945	0.549884541825009	0.137355175130596	19.1160159026255	0.0590425141176345	0.340216279006387
B4GALT4	411.85319743693	0.573472142412034	0.164157894600355	21.911158435014	0.0250706151776976	0.195150144567537
B4GALT5	486.317600449186	0.46429460157971	0.239310714967381	7.18123434086755	0.784222552290249	0.999999965386961
B4GALT6	118.731275958217	1.29360786150168	0.347880547170549	27.6850403255323	0.0036168254840605	0.0485152637187066
B4GALT7	437.793383157222	0.326529719045298	0.15892523778151	13.0974902226533	0.287001301384173	0.838546638253563
B4GAT1	299.565822447826	0.508160482095622	0.144880386096317	16.2404133170614	0.132437693756391	0.556757179213059
B9D1	352.416055292448	0.813368139159044	0.241973878259379	19.0281714744256	0.0605896933739988	0.345560534629385
B9D2	114.999375660121	0.590746839938841	0.310482918655864	6.32554146967425	0.850784332836655	0.999999965386961
BAALC	41.626031707351	1.09607734334046	0.455375263229912	5.40370717855888	0.910051620303352	0.999999965386961
BAAT	66.8326742059779	0.944123529493566	0.663633491595419	1.76004260497837	0.999177443266436	0.999999965386961
BABAM1	946.447350325548	0.331876830759158	0.163345949085666	13.4615510885445	0.264231312003278	0.80252257410102
BAC5	0.0806291260824222	-9.96578428466209	7.25997055193951	-0.332594449317664	1	NA
BACE1	621.876129171213	0.552963106443226	0.206190711675135	4.15420743145194	0.965186872911655	0.999999965386961
BACE2	452.019036193266	0.794725137808505	0.294815201252691	3.2112474748879	0.987629093478272	0.999999965386961
BACH1	1761.07391657037	0.213521348382727	0.151908711381662	7.60784395980062	0.747942077523246	0.999999965386961
BACH2	605.893627231465	0.496841095682675	0.217358416467507	9.90735674643798	0.538739291247136	0.999999965386961
BAD	84.1615718735837	0.781671325679032	0.342040678771086	6.85387032386353	0.810790869748718	0.999999965386961
BAG1	5354.08425084277	0.284844461934879	0.128129999141751	4.96447861827846	0.932874653427374	0.999999965386961
BAG2	754.841824740972	0.560558462432726	0.253042749792049	6.04062954479991	0.87063960783675	0.999999965386961
BAG3	1900.04531600843	0.409694836576116	0.134794856497584	17.3438443006099	0.0981082052112154	0.46632204399669
BAG4	1199.37055288771	0.181955475419394	0.146638418081644	5.23246872271432	0.919387396172054	0.999999965386961
BAG5	1482.49650232289	0.302575341444561	0.174255971371383	1.60301290463724	0.999474876499465	0.999999965386961
BAG6	4718.76649975268	0.243410414524164	0.105722900257146	8.23399652554269	0.692202069208463	0.999999965386961
BAHCC1	556.08318803023	0.686823312944282	0.222296016853076	13.8363799714866	0.242179858528179	0.768028244338036
BAHD1	1494.23062705808	0.366126475809859	0.169418191089085	11.4103163620805	0.409555575563507	0.968658006723401
BAIAP2	2291.8773178162	0.670268200754381	0.226098154723096	12.4103275041582	0.333603356412576	0.894487920355182
BAIAP2L1	1346.39562596	0.284510219227533	0.165290991003972	11.740491522119	0.383462427733077	0.941456475724454
BAIAP3	57.9955426254396	0.861306587630052	0.30680623125459	11.8409357258299	0.375717644569871	0.935142171154063
BAK1	439.570070223195	0.480150706217456	0.189039648696949	16.5849710956654	0.120765503782709	0.525641137676655
BAMBI	2913.0786307084	1.10179955284228	0.219031333551459	36.9508686894892	0.000117436515077051	0.00312708490349959
BANF1	4427.85669549438	0.372070487291829	0.176247592673972	11.4267841592414	0.408231672087115	0.967721842772309
BANK1	118.231515944356	1.32231484912293	0.536811322325753	10.3149264131117	0.502301568344752	0.999999965386961
BANP	416.091574930291	1.24234083062209	0.237160788043453	75.0969141877372	1.29863124806083e-11	2.06084400801137e-09
BAP1	1563.06251873022	0.220638698188477	0.140455966463207	2.47432230169869	0.996012805320664	0.999999965386961
BARD1	223.158241637354	0.892654374126295	0.326525220869175	3.77121782116279	0.976137805733273	0.999999965386961
BARX2	3155.11784864618	0.75770797753558	0.168424678302647	17.6175312539157	0.0908901144077134	0.443541749593865
BASP1	253.313383839017	0.517496367118295	0.21399579591799	7.1185415556522	0.789404092480135	0.999999965386961
BATF	32.0559758517135	1.46485637223227	0.534787805372606	37.9654456046312	7.92938515009851e-05	0.0022613687099078
BATF3	156.325254570726	1.64539541444692	0.515003557785469	26.9427365644744	0.00468762966969972	0.0586788655472971
BAX	509.835847679975	0.286532057198861	0.216353681104971	4.46801310960399	0.954178073225498	0.999999965386961
BAZ1A	2939.35977712294	0.398540342579365	0.165353774923777	10.4459921849768	0.490771220545282	0.999999965386961
BAZ1B	2893.01506552235	0.305311407290315	0.134307593385789	4.72790252135019	0.943624601779538	0.999999965386961
BAZ2A	2941.46284341101	0.394943723242606	0.234558241118637	7.09579356013887	0.791273712681129	0.999999965386961
BAZ2B	2114.13362632145	0.178433050929336	0.18583018370785	2.31151171994497	0.99706781568269	0.999999965386961
BBC3	77.4100027491912	1.76437204709133	0.312719389913621	37.8471627193208	8.30210996700688e-05	0.00234388694305253
BBIP1	738.400745467372	0.500211054437762	0.263750489769463	5.46282005680905	0.906701095555191	0.999999965386961
BBOF1	7.02304219839226	1.53574220993432	0.998372462552131	4.71771437203512	0.944063062034303	0.999999965386961
BBOX1	344.449180135929	1.20786564366498	0.270489610660608	43.8243786953287	7.79952409430263e-06	0.00031005865682361
BBS1	697.08183210719	0.470921014144347	0.204914694072866	8.05898548865065	0.708010443516138	0.999999965386961
BBS10	162.837762739405	0.367307710698266	0.267623036158946	5.27551688420237	0.917092599293179	0.999999965386961
BBS12	245.578660240796	0.442480045723181	0.171764757311793	11.3979966304153	0.410547509115856	0.970263484328021
BBS2	556.339633655479	0.492942048120289	0.199970505751395	9.5558706930035	0.570722504314266	0.999999965386961
BBS4	676.1500136721	0.435067432735835	0.132510101755436	10.3335537335494	0.500656781652872	0.999999965386961
BBS5	226.35974194139	0.985682020448547	0.309327981544565	4.62591436961742	0.947922603686196	0.999999965386961
BBS7	404.424006982817	0.676060668126375	0.297443628369147	4.48282657630182	0.953611753044325	0.999999965386961
BBS9	190.182936410176	1.09287446563541	0.218263474350155	32.2762549046233	0.000688624083347844	0.0131944933905734
BBX	1668.70849227469	0.322774598603597	0.145026243889834	11.6914552311047	0.387276653783131	0.945512406097327
BCAM	5520.84556970493	0.549828950114759	0.187937323571599	12.0740417144399	0.358103563052877	0.918163987596521
BCAP29	795.010486628783	0.608451387325176	0.265060087860567	7.57592600717129	0.750712387807894	0.999999965386961
BCAP31	4110.84714326633	0.261631389029557	0.124464115855578	7.27513017767922	0.776385290720713	0.999999965386961
BCAR1	765.320508127439	0.611572575430347	0.234251202819468	7.00029421696956	0.799059674522268	0.999999965386961
BCAR3	224.233497505064	1.00142531240951	0.261208435560461	17.100023256184	0.104951537502514	0.484228922620039
BCAS1	342.216974832378	0.557000945225516	0.257018952415351	10.3334622014579	0.500664859095889	0.999999965386961
BCAS2	1138.60793810328	0.488076442019979	0.169530051568333	6.13114212923051	0.86447221663733	0.999999965386961
BCAS3	475.078026555584	0.362859280878128	0.205247389444902	6.84643249586816	0.811379826774486	0.999999965386961
BCAS4	152.220428093007	0.679364504593954	0.24999032537407	17.0259838269504	0.107109335802174	0.490732831179319
BCAT1	8.81610652050529	1.91652211967577	0.948285587737189	10.2856061343813	0.504894489941392	0.999999965386961
BCAT2	630.027354309757	0.933934113198103	0.24864430740417	49.5879760973203	7.42240222888195e-07	3.97978286266864e-05
BCCIP	1044.83831303441	0.384533227004487	0.171310130401144	4.89769147655966	0.93601979081951	0.999999965386961
BCDIN3D	241.0406043049	0.35579485440807	0.158055582029136	7.43060253616585	0.763217864017486	0.999999965386961
BCHE	107.954659342504	0.961750368474129	0.347344803550656	23.2709564373169	0.016182547365195	0.143846011251696
BCKDHA	1067.5576465342	0.466124915627892	0.154868157698165	6.3805091618982	0.846808274426528	0.999999965386961
BCKDHB	800.857077138058	0.488903477769752	0.163340927073426	24.363494056974	0.0112848062754633	0.111031208944284
BCKDK	489.583001441955	0.430332203422845	0.159826484778889	8.93256808135158	0.62811664606531	0.999999965386961
BCL10	478.993131814904	0.454723331688569	0.213850452254216	13.2468194687593	0.277500036501754	0.824248410306643
BCL11A	533.89045504147	0.469474291359037	0.21791515748573	8.9976676041382	0.622107632616018	0.999999965386961
BCL11B	1364.47316715351	0.61644457568244	0.159007145013903	18.0397445927922	0.0806629683985496	0.410601278393393
BCL2	133.298487469532	0.832508034069514	0.35146313688999	4.96734152013244	0.932737897590707	0.999999965386961
BCL2A1	70.0743326544336	1.79859124057272	0.567821071947503	20.7376825576138	0.0361928428139457	0.24836996646326
BCL2L1	1886.07540087223	0.505585079508318	0.135730990996674	15.9025133822352	0.144788799151607	0.581935046916935
BCL2L11	372.081400106773	0.614018190416907	0.223847307877119	7.18183057177379	0.784173073410682	0.999999965386961
BCL2L12	271.465893366784	0.376284801619189	0.206886711587311	11.8402678972661	0.375768832931202	0.935142171154063
BCL2L13	3608.13023298438	0.36530927420544	0.147282292835234	7.96663308366544	0.716289644669555	0.999999965386961
BCL2L15	72.1414252392266	1.31501083310393	0.460918150829743	21.1640545871683	0.0317106904020977	0.228898733942137
BCL3	302.78122937171	1.05946565471635	0.297524725133523	19.1413461641851	0.0586030120649587	0.338377368372728
BCL6	3418.35327608901	1.06974586673364	0.184590499625295	64.3458122776732	1.43025447794434e-09	1.49705040515898e-07
BCL6B	226.578101142104	0.607569750099425	0.24295412323269	13.9737352896356	0.234450221858225	0.756684825128223
BCL7A	482.227038812788	0.467986951860599	0.189483600622137	12.67233075331	0.315279993738988	0.873007438061065
BCL7B	396.626033392028	0.310869320421941	0.179609428500199	2.33131255715091	0.996951946630311	0.999999965386961
BCL7C	1177.28477063801	0.417275748322715	0.238021640863738	5.29492404333905	0.91604654816553	0.999999965386961
BCL9	485.238973038183	0.389572261209677	0.226787205569043	3.71484766676605	0.977528572977127	0.999999965386961
BCL9L	1753.25523929921	0.680717735415454	0.318214749077359	7.18471806899765	0.783933398454914	0.999999965386961
BCLAF1	3869.79437352488	0.471606325179363	0.18232130339733	5.74074480438742	0.890090311768492	0.999999965386961
BCNT	1055.63618800643	0.318946745170035	0.149155027093316	10.3454169016774	0.49961029599576	0.999999965386961
BCO1	56.7407294131657	1.0868621381597	0.407312636135361	9.14758948960656	0.608271207635886	0.999999965386961
BCO2	1044.63535229361	1.40763560133478	0.52719380376765	21.7729503058513	0.0261924199685398	0.201333765680049
BCORL1	391.481919310602	0.694348622381375	0.300882588071201	9.59630026498445	0.567023358093457	0.999999965386961
BCR	702.879445807911	0.739680653360123	0.231338948681342	20.7179473375024	0.0364137570724715	0.249396957309116
BDH1	1201.58501386972	0.711318138679881	0.179744005343975	46.4362021207775	2.70705275955943e-06	0.000125932350360781
BDH2	811.101341210792	0.643705980679086	0.242384524740536	11.8021632244208	0.378696295120414	0.937142141954242
BDKRB1	12.642100586623	1.76670431211383	0.721927291363762	12.4530968390468	0.330566056474291	0.890957246856745
BDKRB2	79.4069245403993	0.929335313920646	0.402861601957483	12.4936683940913	0.327701429307542	0.888346704217359
BDNF	93.4829845691828	0.727449735884061	0.262609348310564	10.2928797819578	0.50425080232284	0.999999965386961
BDP1	2748.8021090047	0.467623936004704	0.221033947109481	7.84370266967801	0.727232578294888	0.999999965386961
BEAN1	84.1916971352976	0.941889133045404	0.344704762373157	22.0372346434352	0.0240863635234368	0.189966407737639
BECN1	2086.83900110951	0.314596546032037	0.129258227564648	3.89175395426435	0.972977053392212	0.999999965386961
BEND2	2.9994906325114	2.78252578214383	1.81913731128889	9.06396144871044	0.615988332262023	0.999999965386961
BEND3	280.694516497951	0.913290924183827	0.201117667967377	31.0408238630731	0.00108521926212611	0.0190430298261178
BEND5	120.324301143426	1.08688686951679	0.22312661582024	31.3478081898843	0.000969772353594476	0.0174517726708273
BEND6	13.1303300467159	1.62828022298677	0.729271826592075	6.81310855911477	0.814010063307777	0.999999965386961
BEND7	467.625551836336	0.549297297421263	0.207002655808165	16.6677058744199	0.118096236171246	0.518906519152139
BEST1	9.6664455175293	1.54049652526566	0.681494530582947	13.7174125569232	0.249026445681718	0.779688527943491
BEST3	1.22154063912687	2.11609559877529	1.75651115149275	11.3673644261795	0.413019454620407	NA
BEST4	18.3934424253829	0.999940095259962	0.674303818969751	2.5519159148256	0.995423079686829	0.999999965386961
BET1	905.327367385913	0.394098442770091	0.166361710132366	8.20340966628277	0.694975122166068	0.999999965386961
BET1L	1290.61784259517	0.56063628686478	0.152461981748837	14.9165318407065	0.186350124783296	0.674452410425914
BEX2	1273.82420758829	0.911220109584425	0.178625126410717	34.0041351090267	0.000361128206334298	0.00787390364856776
BEX3	728.755454163698	0.485493131551579	0.215878282825618	8.11867403496325	0.702635380088869	0.999999965386961
BEX4	66.8371452834035	1.13769139571051	0.513520722071065	12.1791436869756	0.350329380369446	0.911848502219412
BEX5	1417.18044899867	0.567714427825064	0.202316520396809	5.91007703535354	0.879296241363789	0.999999965386961
BFAR	1133.3065653134	0.394679945117832	0.119588026483427	22.1405685985588	0.0233065765241657	0.185453624279229
BFSP1	20.5173937520199	1.07585110237723	0.517626864497477	11.5798301251691	0.396039486611264	0.95620746877965
BFSP2	20.8968533775283	1.66696707651349	0.895071841547322	6.39714677582492	0.845595868742724	0.999999965386961
BGLAP	67.7219359405561	1.28853508706201	0.331649598121869	15.7521722131608	0.150583620850858	0.594037356855451
BGN	3951.42763621688	0.915070207204491	0.236554514621496	20.821010377971	0.0352735734443401	0.244837170454224
BHLHA15	125.302646997247	5.02148299030329	0.811686111712435	39.685708156883	4.04836529788667e-05	0.00126651402753281
BHLHB9	113.438745650631	0.627156483684968	0.310956861627282	3.83982501061706	0.97437027740244	0.999999965386961
BHLHE22	594.517503776356	0.882940983985642	0.35388749076873	11.073789206878	0.437102322304354	0.994503079298605
BHLHE23	202.578613878778	1.16917166969243	0.295300715487957	21.5067241014693	0.0284855998609019	0.21435550059764
BHLHE40	1475.48340404796	0.307759613175806	0.162404839488568	5.95126005649075	0.876596434392333	0.999999965386961
BHLHE41	602.777160884749	0.592194057237836	0.19436612764963	18.6124407639934	0.0684150833777945	0.372935674974947
BHMG1	3.26689501076125	3.37437092645121	1.54307660886015	13.6591537743084	0.252430821361647	0.784852852386552
BICC1	736.690449138101	0.549818519691108	0.246924141740511	10.0206122321478	0.528534021731811	0.999999965386961
BICD1	70.982237878507	0.788351923208756	0.34873008345314	11.4244235211168	0.408421310166953	0.967721842772309
BICD2	6596.50593083162	0.262406030100236	0.11386151881614	8.4020579437414	0.676899344837369	0.999999965386961
BICDL1	169.919431757371	0.648112786640985	0.225891080902004	16.7841239912769	0.114425305686791	0.509887039244716
BICDL2	2123.11295508879	0.66262339508513	0.176440163585296	14.7551016513736	0.193985256090675	0.687419749568216
BID	763.884914292225	0.412885968022418	0.215029816240854	2.25495975614996	0.997380914365864	0.999999965386961
BIK	12.9967767679255	1.34643888917654	0.739749990191955	10.4929172865329	0.486667978701618	0.999999965386961
BIN1	683.150369064751	0.726064782715516	0.25444927877549	23.5495794467968	0.0147717313040489	0.1355142790681
BIN2	176.474306520954	0.932250558401564	0.40774072435913	25.3661019363867	0.00805530102762485	0.0877697749842757
BIN3	582.060491656099	0.394416066769433	0.142786638350865	9.36453150604808	0.588283306560666	0.999999965386961
BIRC2	1716.52933590581	0.326620656562911	0.14227579097446	7.02460709283065	0.797087280416813	0.999999965386961
BIRC3	2480.36885989808	0.786905141605756	0.220242708574938	19.8184969222999	0.0478928394696235	0.296923533422574
BIRC5	550.138382773078	0.686128716161026	0.261204095994361	17.5919777656208	0.0915439070010367	0.445670708057001
BIRC6	2753.96437163857	0.589121568964349	0.231699824413458	8.23147323569458	0.692430986348057	0.999999965386961
BIVM	803.030545801396	0.303821905397532	0.131844189865089	13.167321126487	0.282530252187622	0.83198024719308
BLCAP	1363.35851671109	0.538931530849238	0.138195732426683	21.2326711345017	0.0310390949309394	0.225715931282714
BLK	50.964514841533	2.02553160983786	0.519760276667035	18.5546349788685	0.0695716392144515	0.376832016642438
BLM	235.089574407152	0.687921656930251	0.225042597229054	13.2905177863689	0.274762176304422	0.819207591714913
BLMH	4600.66949275493	0.512368620616669	0.187650744065125	10.6611490328257	0.472072031480169	0.999999965386961
BLNK	250.784450812708	0.909088859505255	0.291659639742301	12.6434635829347	0.317265548878384	0.875056796795269
BLOC1S1	1778.02923864029	0.5179816492253	0.246931899282225	6.54188268544851	0.834877870062308	0.999999965386961
BLOC1S2	1122.57218122542	0.669536783515604	0.238350718964635	8.89749906338972	0.63135317193334	0.999999965386961
BLOC1S3	368.000135462413	0.355095541673951	0.170210501487822	6.01286158518997	0.87250471174265	0.999999965386961
BLOC1S4	391.240549483238	0.398787684697138	0.198361825612542	8.42367567973071	0.674923716793144	0.999999965386961
BLOC1S5	533.94478879396	0.384878783967953	0.140041375318359	10.4393955495132	0.491349123629495	0.999999965386961
BLOC1S6	1633.17338920426	0.429396227098109	0.207314256397138	2.17654275397115	0.997773331085527	0.999999965386961
BLVRA	1724.33147908909	0.282305268600111	0.119477041595531	11.8427172899188	0.375581109607348	0.935142171154063
BLVRB	725.912786527856	1.02293110356075	0.28951947847252	26.3828253298157	0.00568995536165688	0.0676899065454852
BLZF1	1854.53186668622	0.492236075505071	0.17919771472862	3.88322955582765	0.973209058064163	0.999999965386961
BMF	1069.39775060423	0.596881155662029	0.205291566075968	8.43956000229758	0.673471126178041	0.999999965386961
BMI1	1285.22841281986	0.59143109458965	0.219170127494313	9.46442805798262	0.579104740522436	0.999999965386961
BMP1	1275.43636923885	0.724612268485746	0.195872068435804	22.6836622437903	0.0195807155490742	0.163821990040256
BMP2	733.554101638622	0.656174580760056	0.223872889076962	15.6587793144467	0.154278716051721	0.602186021591718
BMP2K	2228.41124984978	0.561245444458273	0.172832115290105	23.2267062759956	0.0164179339110423	0.145200945393928
BMP3	258.147523475416	1.1641070613619	0.429161072997496	17.8083014659744	0.0861366131228176	0.428570486227764
BMP4	1468.11354110283	0.698499115445878	0.206325587087964	17.9896838441817	0.0818202938776783	0.41428285594259
BMP6	90.6268194738467	1.04174921320871	0.325526287098024	15.4537061687565	0.16265367526201	0.621736406722191
BMP7	948.635406172872	0.470283486947057	0.134598650282035	12.0165074279725	0.362403688418033	0.92292899433784
BMP8A	374.874948261532	0.943470509943817	0.388155177069657	13.8034282208779	0.244062100575218	0.771139051881686
BMP8B	191.120933335732	1.16685365219378	0.42678856004935	22.013525143812	0.0242686717646891	0.190453285224348
BMPER	80.9892751998788	0.985993837670245	0.296852782919096	17.9694659153916	0.0822918219832575	0.415932912770728
BMPR1A	3361.57154224734	0.41821838465362	0.236976411098268	2.22933921809022	0.997514326954422	0.999999965386961
BMPR1B	210.976195058963	0.369957060414977	0.32258201020282	2.53999503380368	0.995517544564925	0.999999965386961
BMPR2	4577.7398502819	0.4250817816908	0.206975039316824	6.89342203046681	0.807647536390174	0.999999965386961
BMS1	2046.23392831382	0.263111859599385	0.114824762099485	13.5573074253358	0.258463945801977	0.792457013584814
BMT2	670.47853157533	0.371509982632474	0.216032706412455	5.36301398205762	0.912320218117742	0.999999965386961
BMX	69.9907855751544	0.715175214345027	0.334198052114868	12.1605250533725	0.351698877183982	0.912731949453203
BNC1	1746.53858396275	0.595269296879242	0.209955430512245	14.64622671992	0.199272354415781	0.697954498669074
BNC2	2622.97917490544	0.669597758943061	0.230669491392848	17.8254745691972	0.0857195684864302	0.427576595355126
BNIP1	455.403951321573	0.298051897718483	0.119446488043487	10.5946397009631	0.477820507385388	0.999999965386961
BNIP2	1058.11471932851	0.317443533661441	0.154139650226421	9.08445464639721	0.614096913793035	0.999999965386961
BNIP3	1182.10072424108	0.356110357988871	0.170568579477941	7.27311433240197	0.776554487678933	0.999999965386961
BNIP3L	8054.00348071902	0.380626821185411	0.252842090166492	3.76658525321284	0.976254180845184	0.999999965386961
BNIPL	1976.13483777252	0.582772214420603	0.161722053642567	17.2999762754995	0.0993102034555434	0.468658289859
BOC	2567.98376096511	0.586228854837095	0.203507665945525	12.5423086874905	0.324288456259623	0.884396055156842
BOD1	928.562588428148	0.457564272678077	0.147883673427539	20.5853204679378	0.037930742132302	0.25630704473044
BOD1L1	1687.55035213419	0.438074990501568	0.209807979934571	5.10034999890678	0.926209384665229	0.999999965386961
BOK	726.35730103019	0.450069465347814	0.209674716457585	7.90364080493947	0.721908690728055	0.999999965386961
BOLA1	636.68102318166	0.604911808209776	0.227085900042411	6.44391373245389	0.842165954605847	0.999999965386961
BOLA2B	1801.86183100225	0.301993851764682	0.227990526478721	8.1679358825495	0.698186066289529	0.999999965386961
BOLA3	340.191278550118	1.04311080972325	0.27459396476816	24.5352665632619	0.0106559215293504	0.106765388927983
BOP1	592.208315013711	0.377552576050576	0.160595182760115	12.0224050359392	0.361961462613321	0.922865724449979
BORA	258.943078087794	0.616367376139243	0.241517814870253	8.82263811613194	0.638259627108794	0.999999965386961
BORCS5	272.037962030695	0.341619599227754	0.16292910369421	12.5056490463689	0.326858610937163	0.887529149444114
BORCS6	389.928486882069	0.259090369896042	0.157831607224869	3.2709117878581	0.986639337105286	0.999999965386961
BORCS7	659.6326417923	0.685860764597514	0.254198673629093	8.51652803461792	0.666422107420357	0.999999965386961
BORCS8	510.495921498084	0.23453558608169	0.212781352173421	4.66338838410661	0.946366908243098	0.999999965386961
BPGM	987.075742412178	0.379671797649822	0.133908733425595	10.0611377750109	0.524896299190789	0.999999965386961
BPHL	821.807079559485	0.977465102118863	0.29224102479644	10.6435359656587	0.473591491662136	0.999999965386961
BPI	65.9243877455448	2.9810881193445	0.808023058386001	24.2474762710628	0.0117292588258932	0.114601963841075
BPIFA2	6.27182278200415	2.34025724591131	0.961552290373375	3.87099100472307	0.973539877889791	0.999999965386961
BPIFB1	1.96590106932501	1.22403618282004	1.72270591037024	4.40665998887309	0.956478522301821	NA
BPIFB2	51.7208405299189	7.84455174278344	2.21593501972555	76.3253521685679	7.54313637768147e-12	1.30205120736856e-09
BPIFB6	27.1162908100568	1.65425718816429	0.612893264089342	10.8435827161676	0.456459065634515	0.999999965386961
BPIFC	656.55204578132	0.641895906330209	0.253154393568731	12.0802373356912	0.357642368724427	0.917799495534594
BPNT1	1025.68483525867	0.505288017731561	0.17977777205795	10.2078751745137	0.51179136556687	0.999999965386961
BPTF	2339.88082739485	0.530088585414165	0.182546299084356	11.8297490724127	0.37657563051278	0.936089393557026
BRAF	5808.70851251322	0.772358376569984	0.293402889809838	7.66997668136548	0.742526224702451	0.999999965386961
BRAP	1163.85855406581	0.431230898463177	0.13494874012362	20.0880406686397	0.0441477890795111	0.282333504552038
BRAT1	657.776404136282	0.502275358933847	0.244997283942337	10.2125940839632	0.511371745396414	0.999999965386961
BRCA1	266.783137779318	1.07395887018076	0.292631034183209	26.3166111403788	0.00582122391055618	0.0686728999608416
BRCA2	638.880460065649	0.599080136726635	0.182631377303829	13.0011079650744	0.293252999463268	0.845840106712469
BRCC3	904.627894416772	0.373737331357462	0.195739594075669	6.41114643881656	0.844572508541176	0.999999965386961
BRD1	1286.56880261372	0.315929330722079	0.125459884615447	12.747208987985	0.310168341260524	0.866235114862986
BRD2	5707.66576795605	0.233773677413167	0.11969782697489	4.51768412949968	0.952262402029699	0.999999965386961
BRD3	1285.85154245212	0.356388059120066	0.14620599617809	10.6649747164528	0.471742268790745	0.999999965386961
BRD4	1881.92488047261	0.319097489297411	0.11733559915507	6.0277070631285	0.871509167487215	0.999999965386961
BRD7	2136.77429034644	0.357746598038014	0.111903183134705	6.52552584629603	0.836104233169679	0.999999965386961
BRD8	2205.31122403043	0.140618156968492	0.112316329998682	2.82753586433756	0.992814265472004	0.999999965386961
BRD9	989.189465922781	0.390744445152984	0.212734097006077	2.31119602985342	0.997069636364629	0.999999965386961
BRE	723.934961600191	0.520803691955463	0.173671378109698	9.90757287131493	0.538719764235231	0.999999965386961
BRF1	952.449564575161	0.545764942799132	0.267121492496304	4.34590826249331	0.958685086664536	0.999999965386961
BRF2	192.297807516823	0.612495448018232	0.167737582669782	19.1482046431175	0.0584845178360682	0.338166691584493
BRI3	1024.70350459358	0.408012388221901	0.21239138133725	12.876237369389	0.301491422480975	0.857146214756474
BRI3BP	1085.45660290276	0.591350019527721	0.149008179451108	26.7244745222214	0.00505640214719295	0.0620489933828147
BRICD5	6.64603209284478	1.95180713470567	0.906472715500966	9.59658604159878	0.566997226847494	0.999999965386961
BRIP1	269.610460716366	0.406269428012685	0.223084926098365	5.11546352148781	0.925445954513763	0.999999965386961
BRIX1	1016.24834448582	0.571800501776881	0.254503536336102	4.65981864173301	0.94651628044683	0.999999965386961
BRK1	2109.58859273482	0.58425352613484	0.174445653473752	13.9643439391843	0.234972759255118	0.757001461590572
BRMS1	863.997502134377	0.353180853887108	0.140468693016941	10.7124549804246	0.467657854363134	0.999999965386961
BRMS1L	524.678852020603	0.559601513264852	0.197584605374917	9.69129838334641	0.558350187947947	0.999999965386961
BROX	2457.153541555	0.453661864155221	0.187306333460316	5.39558504042054	0.910506895677822	0.999999965386961
BRPF1	854.295936490954	0.298230051637002	0.144899132455238	6.82120911855236	0.813371974228581	0.999999965386961
BRPF3	828.579824146763	0.521730233770773	0.211175501652873	9.80531792413893	0.547979438231787	0.999999965386961
BRSK1	30.9812468916379	1.06686018881255	0.467701455050439	9.02718740306528	0.619382704555707	0.999999965386961
BRWD1	1731.2155155257	0.577810705436997	0.255815896358558	7.67808868307077	0.741816944913762	0.999999965386961
BRWD3	1183.20500974267	0.355962380702931	0.214760534525293	7.03373986026708	0.796344630564868	0.999999965386961
BSCL2	669.111280114833	0.493254129415511	0.151224916841477	25.2285093236388	0.00843962776087794	0.0903563629371905
BSDC1	1385.87841528788	0.357319646245804	0.138624532083791	8.20830818229791	0.694531287372651	0.999999965386961
BSG	9702.95377206304	0.416997602207818	0.15964387333496	13.5627309033715	0.258140048924552	0.792338150481568
BSN	14.4082207016187	1.82081573203593	0.668374491148947	9.23737761847883	0.599991502674577	0.999999965386961
BSND	13.2412171845031	3.24606787413731	0.873672191542053	9.7483764906315	0.55315292466117	0.999999965386961
BSPRY	290.098284162064	0.915523990606735	0.200142439243434	37.1813086270928	0.000107441875938475	0.00289622086947578
BST1	429.432120860334	0.835975723368808	0.282601167993624	9.84774006156243	0.544132933117525	0.999999965386961
BST2	77.7329343075348	2.40779823985852	0.625947566886663	32.4682685382456	0.000641295252751434	0.0124574609907628
BTAF1	2158.38343072322	0.393964439668323	0.230402665060459	7.22126097399041	0.780892668667809	0.999999965386961
BTBD1	1508.51665494905	0.546247061619995	0.16167371428809	9.93667191385362	0.536092429563698	0.999999965386961
BTBD10	462.720614991874	0.429607686255758	0.19884415376693	6.17374396864682	0.861523502717993	0.999999965386961
BTBD11	393.988457397261	0.401043184742302	0.164092970820355	11.3511397208449	0.414331952258462	0.973643743258344
BTBD19	173.609425706979	0.502044022593946	0.245785298196633	6.81282919523665	0.81403205430564	0.999999965386961
BTBD2	1943.61388129859	0.249654233299819	0.148016761676635	6.71482077183651	0.821685359045864	0.999999965386961
BTBD3	3090.04788546647	0.466081333474617	0.216217504098635	9.11157963378764	0.611593698883944	0.999999965386961
BTBD6	993.189645199214	0.36629638044136	0.135407320828027	8.63282151583655	0.655743090187895	0.999999965386961
BTBD7	1399.09634353066	0.355630160245843	0.193605092544415	10.2230209628582	0.510444972071395	0.999999965386961
BTBD9	948.42853583771	0.424667081841321	0.158349536817506	10.453647178042	0.490100930002108	0.999999965386961
BTC	1213.8364211112	0.710405962282477	0.262360208227048	11.9758253580349	0.365463097561367	0.925200416031464
BTD	246.976227940631	0.42653003858744	0.229504265666946	7.7559025420253	0.734988520242759	0.999999965386961
BTF3	10060.1164432079	0.509091492580813	0.220792764146413	4.62983484603376	0.947761129156375	0.999999965386961
BTF3L4	1796.20281845213	0.477480253344463	0.147807710302887	9.91709537829217	0.537859592483279	0.999999965386961
BTG1	1781.22305263168	0.419761115436992	0.170578547255597	7.56521669322188	0.751640050387233	0.999999965386961
BTG2	1563.53350853029	0.366424969734067	0.101076312571249	27.2482884100978	0.0042144091642315	0.0540765106617357
BTG3	1032.93296734254	0.464974165332368	0.216127495072479	6.6759927856229	0.824682646797818	0.999999965386961
BTK	211.041182006465	0.813329592042616	0.445727814309273	13.6321997748388	0.254017388055821	0.786342232068703
BTNL9	185.833661799107	1.05512942351731	0.498238292355698	11.8889183081203	0.372050586359437	0.930452025155784
BTRC	915.982519781097	0.255008579028547	0.138095124209246	7.50509771897754	0.756829987372157	0.999999965386961
BUB1	445.588701727848	0.736974640369199	0.223390537756422	24.5903046796573	0.0104615399688079	0.105288787341333
BUB1B	668.316392942346	0.723795050823276	0.210719756842753	25.9258569765382	0.0066567847083185	0.0762913276006356
BUB3	2090.35905113024	0.265694953678037	0.130947682635295	7.18970157634868	0.783519539837609	0.999999965386961
BUD13	376.128520299499	0.250555460161317	0.136786677832723	7.89066341988479	0.723063307111306	0.999999965386961
BUD31	2294.11776760229	0.294279312253735	0.144296650172327	7.30746997699396	0.773665403377882	0.999999965386961
BVES	5.482316380325	2.94097885861841	1.28745593324114	13.1130103175134	0.286003354057684	0.836818552232236
BYSL	730.623952971326	0.606259532160489	0.150173235659734	20.9954247827482	0.0334184860725941	0.236125303029266
BZW1	13418.9048654233	0.600069678200829	0.246195416873735	4.87418936227027	0.937105924666131	0.999999965386961
BZW2	2121.97348982695	0.515538846393411	0.18499618585496	12.248410416819	0.345263688328501	0.906363241585945
C10H14orf1	242.298939900389	0.808299515917611	0.181018223491472	45.4163140818283	4.09874332955213e-06	0.000177263892832806
C10H14orf119	732.894349244675	0.407257485722135	0.193886606215461	4.75295286636606	0.942537925812158	0.999999965386961
C10H14orf166	3324.8618634065	0.517275787761317	0.220362762178938	6.84967696713943	0.811123001070078	0.999999965386961
C10H14orf169	402.66504366801	0.236394460670463	0.144991421583511	8.19837906291775	0.695430815001225	0.999999965386961
C10H14orf37	498.746960372411	0.752207102749234	0.209627225814199	16.2471195521036	0.132201777263351	0.556463438072348
C10H14orf93	265.886574182547	0.422546010968946	0.199057079164281	5.3540887287503	0.912813638850463	0.999999965386961
C10H15orf41	193.75980076656	0.706250382837843	0.195785479162496	25.1466667384092	0.00867643426233968	0.0918636688271801
C10H15orf52	855.623641521976	0.599795212179669	0.28176183308659	1.89167378289807	0.998841902919402	0.999999965386961
C10H15orf57	887.264445041138	0.485296889617155	0.162803547915304	15.4996375551244	0.16074636538412	0.61720331278609
C10H15orf59	54.6884893407371	1.09085637329554	0.57186407350164	3.77939774533564	0.975931402878825	0.999999965386961
C10H15orf61	66.1033676261432	0.811534012542644	0.282762364312575	9.14209245277277	0.608778341483781	0.999999965386961
C10H15orf62	815.846782218118	0.564731159250484	0.215606976755356	10.1794476249217	0.514321697918595	0.999999965386961
C10H15orf65	12.9554260287032	2.43403284994705	0.835274283547552	7.66326172124704	0.743112975850449	0.999999965386961
C11H2orf15	0	-9.96578428466209	NA	NA	NA	NA
C11H2orf40	177.064278315957	2.62744377352919	0.51605183124684	46.5188080558901	2.61738424828768e-06	0.000122339399614739
C11H2orf42	614.351970144646	0.454482508515781	0.210187658876741	7.79141133146362	0.731858129296407	0.999999965386961
C11H2orf49	715.577546428615	0.443694719271983	0.114114361380095	18.9987419631192	0.0611160952082722	0.347387651926218
C11H2orf50	1.2041876823018	1.87229135329766	2.23892425452318	11.8912001846542	0.371876724259124	NA
C11H2orf68	1799.50927105352	0.286527148609244	0.0996257517268539	18.2689775379683	0.075545588107533	0.395820681253233
C11H2orf70	0.113134245347068	-9.96578428466209	7.25997055193951	0.00542562173901473	1	NA
C11H2orf71	0.624140213884079	-9.96578428466209	4.10723540703219	1.31155482616572	0.999803376245382	NA
C11H2orf73	4.13424277678654	2.05668754664271	1.12501493757923	9.2156520209858	0.601994161071826	0.999999965386961
C11H2orf81	6.01294526145372	2.05234504937784	0.911910987129452	14.0687984600096	0.229209932304423	0.748867541393759
C11H2orf91	0.248876554779932	-0.131223878791989	7.22189530859338	0.649715854749189	0.999994553459866	NA
C11H9orf116	391.44456388803	0.506926995366515	0.220465002440749	8.22170318355035	0.693317086906561	0.999999965386961
C11H9orf142	3034.29159567214	0.538310902122829	0.201430577670447	7.80881361095919	0.730320806689228	0.999999965386961
C11H9orf16	2264.0825095777	0.317425048017854	0.23295714400708	3.21727792605702	0.987531431348601	0.999999965386961
C11H9orf69	632.696636214126	0.669786209101815	0.190113751455509	10.4236431692196	0.492730184086724	0.999999965386961
C11H9orf78	1548.89020372636	0.372791647692012	0.171017484312394	9.65427041309391	0.561727493393612	0.999999965386961
C13H10orf113	1.34198540853344	2.22499310755259	2.40312962605908	8.11623882403848	0.702855025135948	NA
C13H20orf144	2.119284261694	1.84638808538718	1.80069107808992	14.5754738718873	0.202768242278624	0.703875212683829
C13H20orf173	0.0941439890574833	-9.96578428466209	7.25997055193951	-0.138530576423971	1	NA
C13H20orf194	766.69250200832	0.489931397864041	0.184276226266273	10.1277313108735	0.518935597371207	0.999999965386961
C13H20orf196	153.76221155115	0.62384135796164	0.237789681222114	5.30948128675016	0.915257230122451	0.999999965386961
C13H20orf27	638.0784893904	0.340010972516518	0.218019418466653	5.67138530372983	0.894366318565995	0.999999965386961
C13H20orf96	29.3780145005327	1.51848948361578	0.48945256293692	12.806628617564	0.306151795003162	0.861497929654257
C14H8orf22	12.5550439830599	3.08062966214973	0.754396650713229	14.5959605928821	0.201751109552635	0.702057909644798
C14H8orf33	514.52449965688	0.404272047323351	0.149669793698501	12.6518282482072	0.316689354465269	0.874517698171144
C14H8orf37	305.456642231206	0.544788947927677	0.239824371058407	6.63631230572241	0.82772488139797	0.999999965386961
C14H8orf59	1785.39060693344	0.424890279271469	0.265596338925089	7.40018186288182	0.765812147969546	0.999999965386961
C14H8orf82	199.708472553823	0.499920871164092	0.205310418780634	8.28415674195026	0.68764599515639	0.999999965386961
C14H8orf89	35.7157415806884	1.23953865085479	0.413551704030197	14.959098857478	0.184377072439231	0.670641780306691
C15H11orf1	8.19163322736487	2.63283008959287	0.887467310151891	14.786541505433	0.192479214814148	0.685089186953395
C15H11orf16	19.1503205979994	5.1949574398239	0.950868059858096	102.871505235776	4.81378050562878e-17	1.82164563057237e-14
C15H11orf31	1967.27100211026	0.34891755262417	0.268575261032401	2.99835399718938	0.990747621147265	0.999999965386961
C15H11orf42	479.956238103661	0.986702735882276	0.310287134774593	8.40791788367903	0.676363957164865	0.999999965386961
C15H11orf49	312.034581158935	0.87634596412737	0.196452351326425	32.587414362632	0.000613536038783184	0.0119892375086152
C15H11orf52	99.8436393358453	2.18307536075062	0.525846938644771	14.2656032755819	0.218643430706561	0.732209909707916
C15H11orf57	1121.19489432309	0.350370435519832	0.15997565114264	4.20451494060364	0.963547897914825	0.999999965386961
C15H11orf58	3334.93644371485	0.450497509714504	0.180281048300932	5.13329403408693	0.924539632106659	0.999999965386961
C15H11orf63	0.0495466288713143	-9.96578428466209	7.25997055193951	-0.836065288881908	1	NA
C15H11orf65	16.6414247432014	2.38945958100827	0.758174982475399	7.85779853601869	0.725982603459723	0.999999965386961
C15H11orf70	19.1950782243883	2.30287529454102	0.523451562273005	22.5588526306641	0.0203841141417083	0.168892041297068
C15H11orf71	191.432761866211	0.773690779637467	0.224618135387718	17.8744244940411	0.0845405204120447	0.423628306765525
C15H11orf74	902.478144786532	0.681116917062757	0.247023088082585	5.6468583882592	0.895857836971613	0.999999965386961
C15H11orf91	0.165401970080496	0.362938410962079	7.25997055187808	0.500564728941541	0.999998618304001	NA
C15H11orf94	1.13441342651799	0.420604862116934	2.51715476716416	7.92103865842037	0.72035915003991	NA
C15H11orf96	678.57999221032	1.32603023248145	0.304996810466509	31.1459750635038	0.00104424814193913	0.0184365900082695
C16H1orf105	23.4725966605764	1.24129666289409	0.618894941418429	7.23586442030688	0.779673665930772	0.999999965386961
C16H1orf106	852.380687409271	0.683691652018981	0.178505707983978	17.4422280909852	0.0954581868674624	0.458041014673963
C16H1orf112	260.701196023996	0.471397197372919	0.268254062585018	3.62285042648813	0.9796812880138	0.999999965386961
C16H1orf115	1055.91560409793	0.489685073666044	0.174917548960824	8.86386735912345	0.634456436561607	0.999999965386961
C16H1orf116	1969.76067753667	0.430336251696417	0.143686749209055	13.6898146912936	0.250634904374865	0.781863292372953
C16H1orf127	0.0684666987421914	-9.96578428466209	7.25997055193951	-0.471278291433041	1	NA
C16H1orf158	24.6137492951163	2.792127881492	0.787092880201764	15.9984784757511	0.141187375717437	0.573551853709275
C16H1orf159	291.354520117865	0.613229241867686	0.223150393004022	5.13359925713462	0.92452406447517	0.999999965386961
C16H1orf167	0.0660568341717131	-9.96578428466209	7.25997055193951	-0.524004893453217	1	NA
C16H1orf174	518.210276342873	0.225147840150099	0.166209504298746	3.51006510277847	0.982126989211426	0.999999965386961
C16H1orf186	151.830900824964	1.47923918577069	0.418235694497555	24.4932712710018	0.0108065340993349	0.107616891703802
C16H1orf21	1166.99899986023	0.419517064631878	0.171676623734351	8.78458182986009	0.641768738059911	0.999999965386961
C16H1orf27	888.590714502112	0.629777169358181	0.198481151630724	10.9718164622606	0.445627431186615	0.999999965386961
C16H1orf53	196.748819011007	0.577719430585891	0.233961356699709	13.3233372141284	0.272718572309825	0.817241523291949
C16H1orf74	111.014509618977	0.505671815380419	0.231200965821937	6.61520520570525	0.829334419681255	0.999999965386961
C17H12orf43	321.321383601237	0.355703612415942	0.174988005474534	6.03353788872806	0.871117150508408	0.999999965386961
C17H12orf49	840.113338332654	0.322041801472843	0.152337282968191	8.6322347435912	0.655797046115632	0.999999965386961
C17H12orf65	226.418768476498	0.408160138020403	0.275780762349038	7.7825567758477	0.732639549457686	0.999999965386961
C17H22orf15	85.4394182416675	1.16598494211031	0.449052676662199	5.69652873219985	0.892826125788339	0.999999965386961
C17H22orf31	24.9782926940292	1.08207777207877	0.447914154312755	10.2012043317803	0.512384757548294	0.999999965386961
C17H4orf33	184.773950608316	0.768194556959334	0.273267362889164	12.7697605179391	0.308639788633102	0.864084269229478
C17H4orf45	1.50034492529437	2.00484861462502	1.80375467781857	9.74057324562844	0.553862797561061	NA
C17H4orf46	373.365697863317	0.664706896175671	0.283857644539296	5.50455304405216	0.904296646114606	0.999999965386961
C17H5orf52	11.4031405700019	1.29510444774545	0.701629820289931	6.04201048797498	0.870546520334688	0.999999965386961
C18H16orf46	71.3510070956348	0.496155449284728	0.286246480511627	3.83795829276056	0.974419467599755	0.999999965386961
C18H16orf70	731.169478441583	0.276762438692724	0.178414220302431	6.57111211907443	0.832676993044732	0.999999965386961
C18H16orf74	189.757062396594	0.712023761919867	0.291234626787021	12.8305680581653	0.304543553125189	0.859553648651387
C18H16orf86	0.690883526971471	1.36237739704713	3.31832997420677	3.43630015041975	0.98361441801773	NA
C18H16orf87	305.184421335428	0.849557974132835	0.283122343964662	7.74451065969953	0.735990934802447	0.999999965386961
C18H19orf12	569.433077014998	0.483765155363286	0.150584726778988	13.4416623927951	0.26544076506729	0.803714936912469
C18H19orf18	50.1071483183254	1.1694961176516	0.41267173474092	17.0737946439374	0.105711626968894	0.486481149554234
C18H19orf47	146.475725835195	0.806851062180546	0.257894020522198	19.5519106954251	0.0518779252611608	0.312395107724225
C18H19orf48	386.217996089199	0.576359007413698	0.225551403082972	10.4088317053144	0.494030107585715	0.999999965386961
C18H19orf54	127.018841274886	1.04616862576774	0.312200501370236	14.1471945500818	0.224955365769679	0.741610267652159
C18H19orf68	167.623666321461	1.00512880374091	0.413868141680917	4.51306840225635	0.952442429866441	0.999999965386961
C18H19orf84	0.171746168159019	0.814240767553677	7.25997055179656	0.792657663412513	0.999984687405852	NA
C19H17orf100	6.14276057744231	2.31314543389028	1.04519881223726	2.14546444250266	0.997916107452804	0.999999965386961
C19H17orf49	536.705178987941	0.397939772390334	0.17610065971984	14.2837341182577	0.217689012833011	0.729963312055836
C19H17orf50	8.01459283902749	2.46403719098502	0.989687059487212	15.9893639629552	0.141526198951266	0.573743828381337
C19H17orf58	243.581720016478	0.728182482661151	0.237113037056881	13.9137910102013	0.23780054603084	0.761875471311441
C19H17orf62	975.566628293586	0.382613758421108	0.238166216166783	2.263970988474	0.997332758039293	0.999999965386961
C19H17orf67	187.619039263199	2.05319456458845	0.450442483432262	13.7491184577432	0.247187961405087	0.775660134672188
C19H17orf75	623.016592470611	0.309789705218342	0.155202859311769	5.52137853029006	0.903318161136572	0.999999965386961
C19H17orf78	2.12434515024932	2.66984670472016	1.60961825657694	15.8851662952095	0.145447868706227	0.583294125475081
C19H17orf80	406.221568205279	0.423858343377782	0.149958069079934	4.67836636368429	0.945737465128456	0.999999965386961
C19H17orf96	44.0547957627651	0.973027137572922	0.43010493954658	12.3016029994387	0.341404973371944	0.902425831469213
C1D	1546.71961291934	0.51989855770938	0.257828866806505	6.59879909212606	0.830581261492809	0.999999965386961
C1GALT1	714.787679087876	0.536401837309937	0.22559711800779	10.8199735850718	0.458466383317907	0.999999965386961
C1GALT1C1	594.133410839351	0.510808864491173	0.1968775978291	7.78514995921279	0.732410755210325	0.999999965386961
C1GALT1C1L	0.0267328260096029	-9.96578428466209	7.25997055193951	-1.58709645982132	1	NA
C1H21orf140	0.292062845346324	-9.96578428466209	7.25997055167963	1.06170668385693	0.99993174161572	NA
C1H21orf2	577.655221456133	0.756043536132865	0.226728399074685	11.8672592077594	0.373703247711329	0.932859635730499
C1H21orf33	1070.01415888749	0.308736551013629	0.137364238871226	13.9033075660104	0.238390132366092	0.762463108869336
C1H21orf58	1.39751053845342	1.54282755609606	1.9901433151276	5.6925827414676	0.893068589390221	NA
C1H21orf59	871.062442825098	0.29147454216389	0.122199641266991	8.80637043422007	0.639759826158444	0.999999965386961
C1H21orf62	21.9599529457663	1.82370238752964	0.659379611617105	13.8555298988269	0.241090959438623	0.766551607664119
C1H21orf91	3716.74361530029	0.532997922991912	0.232311102008355	12.3374312723768	0.338821367308402	0.900068523456319
C1H3orf30	0.303718761718403	-0.00699987643884488	7.25997055176142	0.951632876086592	0.999960851040091	NA
C1H3orf33	167.006891806869	0.885890681043086	0.354319408062668	8.28897648068511	0.687207684058649	0.999999965386961
C1H3orf38	500.358092792584	0.434434229086866	0.197584409862232	7.89882216002081	0.72233753446526	0.999999965386961
C1H3orf52	751.278258827861	0.55077827411015	0.189238344440367	7.48701635792753	0.758384910161261	0.999999965386961
C1H3orf58	2872.11907868767	0.499146960369769	0.212940540503891	6.89857697336242	0.807236441278351	0.999999965386961
C1H3orf70	283.430563355918	0.358478809350486	0.208473388509575	7.34494278056462	0.770501062134866	0.999999965386961
C1QA	701.034900544744	1.41990052203498	0.664441547454245	9.00645768658785	0.621296228510178	0.999999965386961
C1QB	509.871476428347	1.12564276285429	0.607068505366439	11.0301947902075	0.440737127299682	0.99756443420786
C1QBP	1220.90408951213	0.379076285731276	0.161079448734125	9.9405382583368	0.535743608604615	0.999999965386961
C1QC	660.744279190376	1.00679704811606	0.657852620480078	7.48018446821396	0.758971687751575	0.999999965386961
C1QL3	31.4871267180952	0.821351598056904	0.568450182285843	8.06072055508332	0.707854455381349	0.999999965386961
C1QTNF1	867.73565883731	0.865504956259979	0.317534796238736	18.2128703392332	0.0767708930019866	0.399338522995795
C1QTNF2	132.653937494248	1.04625114998095	0.446187548525426	11.2402011990428	0.423365024094977	0.981616230015429
C1QTNF3	526.773418996274	1.7966500538323	0.441241196738286	19.8764420449983	0.0470642319085017	0.293171875750395
C1QTNF4	14.3946553244567	2.04320047375302	0.625722745711379	12.2465117932724	0.345401924609587	0.906363391447854
C1QTNF5	347.178480334307	1.05990629517259	0.475099817905096	12.4626110094687	0.329892839412765	0.890184593161423
C1QTNF6	399.579178295135	5.39170240790258	0.884767048378086	62.3803072630633	3.33927373345461e-09	3.28551142634599e-07
C1QTNF7	426.21436548615	0.871916306825645	0.267990648590767	33.9354144074069	0.000370591693342146	0.00804912068607809
C1QTNF9	42.9903190014856	1.43507887521543	0.398743463719163	34.06816772838	0.0003525229282069	0.00769916335322461
C1R	3139.59598228667	0.866447182229938	0.376541503507052	22.2941357982517	0.0221910260972783	0.179259035936881
C1S	4081.95478677398	1.01471993356012	0.372496061097602	16.6546747289581	0.11851330388324	0.520094735462623
C2	95.0771528325624	2.53575976724404	0.599997341571988	15.3759661433763	0.165923779273622	0.629789898255194
C20H5orf22	560.136077294368	0.200130165251091	0.151667248348595	5.5740908815423	0.900219076345683	0.999999965386961
C20H5orf34	184.100051302338	0.289938382628751	0.210373767907214	3.61714528882908	0.979810071261185	0.999999965386961
C20H5orf38	351.289577111043	0.850572319726789	0.220614737548644	14.5478847934457	0.204144306662951	0.706871664000272
C20H5orf42	576.065131087281	0.597725269914247	0.218662642359096	5.9150242507726	0.878973442554366	0.999999965386961
C20H5orf47	0.749756387479277	0.863058446256246	3.09568418953981	2.78538421945092	0.99326884868142	NA
C20H5orf49	4.59969051995864	2.77991383992205	1.21275262755819	8.56571597040036	0.661909056095726	0.999999965386961
C20H5orf51	2309.80220120649	0.254243115777855	0.155441277710237	4.74271662081401	0.942983448590512	0.999999965386961
C21H14orf132	105.398279128916	1.54329142649369	0.571137430861292	9.11820838366839	0.610982027639696	0.999999965386961
C21H14orf28	222.174954856976	0.34736746628597	0.215960496126322	11.3512744588296	0.414321043527913	0.973643743258344
C21H14orf79	118.286467365479	0.648625970675397	0.367793300162272	4.29000806767408	0.960653039955851	0.999999965386961
C21H15orf39	392.86897768561	0.513773307894426	0.275967344872439	6.16261682600856	0.862296477296751	0.999999965386961
C21H15orf40	553.2303298316	0.318143480271815	0.142617787121799	15.2844834061114	0.169840055375154	0.639090082712416
C22H3orf14	28.2293216406007	1.39677064573492	0.459479423076667	7.73740753598287	0.736615497641486	0.999999965386961
C22H3orf18	67.9217295899375	0.705998182010051	0.385561381552605	8.12281102358111	0.702262175853228	0.999999965386961
C22H3orf20	6.40360475265629	2.42106632605006	0.96017497341635	11.7263160298415	0.384562821579373	0.942186681465407
C22H3orf22	4.07332409574623	1.47952062968364	1.40160707314086	1.48046385607972	0.999643192751097	0.999999965386961
C22H3orf62	232.483383319577	0.688174813356651	0.254481897219525	10.5622481205118	0.480630646848783	0.999999965386961
C22H3orf67	91.643119039347	1.16659056829692	0.287528544269979	25.7457620517779	0.00707931967861249	0.0797406139872562
C22H3orf84	1.07858845559017	0.504410030999503	1.9326906220481	6.28706642093363	0.85354012314404	NA
C23H6orf106	2741.8638642369	0.416563157388621	0.122747395167442	13.7036107407694	0.2498298908021	0.780709296145479
C23H6orf132	4119.24563977135	0.421724341025215	0.222020811022686	14.1945607027102	0.222414011591566	0.738391138229356
C23H6orf136	244.326121480737	0.718759851584337	0.205154713000171	13.1964020518331	0.28068278405778	0.829071723910085
C23H6orf141	182.425658554769	0.6550329138594	0.25987980165368	8.06660831541569	0.707325009145812	0.999999965386961
C23H6orf15	71.4249075626407	1.63055138287102	0.404105418144493	24.4003934544132	0.0111468201424433	0.110003574103811
C23H6orf201	12.1599348086624	1.90079033403294	0.652389289199033	6.50941129364861	0.837308717405482	0.999999965386961
C23H6orf222	25.7873540133997	1.75430124019517	0.550246461351703	10.9395371861697	0.448342513178962	0.999999965386961
C23H6orf223	68.8487578475165	1.14571224955884	0.48634061899754	8.94773846095984	0.626716423105162	0.999999965386961
C23H6orf226	319.817684349955	0.277315470029477	0.198813043000289	9.52254153167229	0.57377527669277	0.999999965386961
C23H6orf25	64.2217425651688	1.11042693768281	0.36789762598304	19.1483811152528	0.0584814717602617	0.338166691584493
C23H6orf47	859.095909570804	0.274900672752359	0.12512279376233	7.98985158624544	0.714212623079565	0.999999965386961
C23H6orf52	287.431789375662	0.50604989963511	0.243454612916952	4.40139235501709	0.956672653902702	0.999999965386961
C23H6orf62	5160.70591449649	0.313738818080902	0.122123026544132	7.49620868830505	0.757594759939045	0.999999965386961
C23H6orf89	2452.43889893838	0.280612918869303	0.122813556934526	6.81366297825082	0.813966417558532	0.999999965386961
C24H18orf21	413.884161171953	0.327672821999739	0.225112667165876	7.26379984452905	0.777335758785553	0.999999965386961
C24H18orf25	829.859744097707	0.304674919758959	0.141857943569883	10.526799199988	0.483713746762789	0.999999965386961
C24H18orf32	1034.749849901	0.492953101694909	0.231407803444343	4.65975270232968	0.946519037279493	0.999999965386961
C24H18orf54	241.470254021581	0.612148565666673	0.301993564843009	5.87025161491141	0.881879556102397	0.999999965386961
C24H18orf63	14.1016803610205	4.0449617217533	1.2895758860801	14.7387032632645	0.194774450418932	0.688975666968136
C24H18orf8	436.416809409443	0.291416560956633	0.157714076644991	4.93622287968793	0.934215847264632	0.999999965386961
C25H16orf45	10.4945796393148	3.98914389448217	1.10170982555577	45.2757866334329	4.33915409025806e-06	0.0001856214656263
C25H16orf52	560.203907301408	0.456858153977505	0.210799145412042	4.65877168801978	0.946560042093571	0.999999965386961
C25H16orf54	118.739174153159	0.924106090603859	0.46686597271706	16.0278608056984	0.14009970552333	0.571638838247317
C25H16orf58	643.328020045963	0.460436013648587	0.171752246573262	9.1298354588609	0.609909197762079	0.999999965386961
C25H16orf59	558.58262524492	0.474474718221138	0.211001322683876	9.0421035778453	0.618005852809648	0.999999965386961
C25H16orf62	836.883501974716	0.317983425668766	0.135032366297806	11.1655523410565	0.429499931580059	0.988040642229646
C25H16orf71	18.7835583606982	1.61630095536948	0.588933088418847	15.6244899535123	0.155653929240053	0.605686774685737
C25H16orf72	2258.50043973512	0.492375825198967	0.162330697554269	18.8183113282616	0.0644338690104091	0.358840042474248
C25H16orf89	15.035137686564	3.34187605562143	0.709375200286706	45.2902921704897	4.31370714441086e-06	0.000184934921977597
C25H16orf90	8.23258155471216	1.66661560073475	0.912368232966849	7.6407284139938	0.745079408202538	0.999999965386961
C25H16orf91	982.772695247917	0.292849123888243	0.168121359418208	4.53885750859996	0.951431283662982	0.999999965386961
C25H16orf96	6.23996283309606	1.77373064008286	0.82052333402327	16.9264929845417	0.110068790644441	0.498603513421112
C25H19orf33	0.198179070297213	0.205558451082241	7.25997055178638	1.24106032770218	0.999850567374734	NA
C25H7orf26	533.449275534537	0.312753367990353	0.15013321098972	6.85564824906663	0.810649984795595	0.999999965386961
C25H7orf43	483.621149279044	0.552672195716782	0.200095286527061	8.47056067089034	0.670633988463132	0.999999965386961
C25H7orf61	13.309566749962	0.838136884400998	0.622881457647059	5.61085485426571	0.898027650011838	0.999999965386961
C26H10orf131	5.07694483289168	1.61359178165557	0.860527713634525	7.46889464344162	0.75994045546282	0.999999965386961
C26H10orf2	490.409351767685	0.477238977145259	0.159294239600091	12.8623234892618	0.302419089145926	0.857884196248814
C26H10orf62	12.7588513814747	2.26068168218173	1.02672706494409	7.89057128468494	0.723071500762586	0.999999965386961
C26H10orf76	754.816091791132	0.314388045904065	0.115998519486652	6.32108117078815	0.851104962077845	0.999999965386961
C27H4orf47	115.194490152309	1.19990451165541	0.35065685039986	7.93177478403544	0.719402017809762	0.999999965386961
C27H8orf4	421.048443358856	1.12132145360228	0.267020481800403	24.6120249630964	0.0103857572829569	0.104967093895236
C27H8orf48	166.160647320903	0.276818677027334	0.226350848953886	3.48010145901026	0.982741724523372	0.999999965386961
C28H10orf10	435.281961873225	1.05135698895126	0.258370378732168	20.5086291317821	0.0388341387078201	0.259483253477923
C28H10orf105	0.524564057172849	-0.0538205211111497	4.50579372932217	2.95580850321365	0.991297088415788	NA
C28H10orf107	278.282116639385	0.426695780218398	0.252400494192165	6.74594649430213	0.819268276916403	0.999999965386961
C28H10orf11	26.2930344287308	1.36485855673187	0.456251937487034	12.3108183721181	0.340739254294143	0.902425831469213
C28H10orf128	63.6558459458442	1.21079692132335	0.445208984288415	14.8605468150252	0.188970601980193	0.678446178756839
C28H10orf35	481.831304319232	0.327569402006072	0.234240033820356	3.97813424785011	0.970552281338804	0.999999965386961
C28H10orf54	4500.33420385225	0.495046416549696	0.182632988859958	11.7429801600097	0.383269431070996	0.941217504631857
C28H10orf71	7.26308237070596	2.86340734062457	1.00893629863318	23.7441934790909	0.0138558497311043	0.128854163992755
C28H10orf99	62.3954063257054	4.04013150582878	1.2161449105558	43.1656201077184	1.01631448246138e-05	0.000392137968350491
C28H1orf131	410.058471775366	0.40847475235453	0.204103504636086	5.53133126330272	0.902736912058155	0.999999965386961
C28H1orf198	3277.47692475983	0.297950322121905	0.153748923231084	5.96006036194831	0.876015796548123	0.999999965386961
C29H11orf24	339.136594496376	0.785426260480584	0.263674799411369	18.2565668398228	0.0758151224923837	0.396462923307235
C29H11orf54	385.564642270613	0.851565936943726	0.313375747361594	7.75113018683402	0.735408569757714	0.999999965386961
C29H11orf68	514.162820113663	0.387020480006967	0.185213814665243	6.45540306319191	0.841318410112487	0.999999965386961
C29H11orf84	725.498034138519	0.628581362344469	0.260641382525309	2.31063708919726	0.997072857908136	0.999999965386961
C29H11orf95	325.058964529233	1.31996193982311	0.389792828246798	8.82128980787519	0.638383977189757	0.999999965386961
C2CD2	2501.49280891714	0.353266486790449	0.144607678146742	13.6687884048785	0.2518654732902	0.784413105765948
C2CD2L	523.727112399854	0.341678720888048	0.191238237500182	4.60525984858469	0.948768374653715	0.999999965386961
C2CD3	538.124761877344	0.668631797031907	0.222009594703197	9.90054520728808	0.53935481670156	0.999999965386961
C2CD4B	51.79314947547	4.31235658202664	0.718770814289817	55.3204049069129	6.77055909622113e-08	4.72450574097303e-06
C2CD4C	29.3182415034646	0.726177679591946	0.552816681599988	1.84566604041555	0.998969112383189	0.999999965386961
C2CD4D	8.40749792998223	1.84498674928102	0.869858517391573	4.17436719913286	0.964535793537464	0.999999965386961
C2CD5	1140.58215006578	0.392099389695412	0.143518121425751	8.58390871361496	0.660238388488909	0.999999965386961
C2H2orf47	201.673714475448	0.347865587424356	0.228537360789384	3.25462099353558	0.986914797008586	0.999999965386961
C2H2orf69	270.978215659111	0.748767217180005	0.24866312174313	6.8729232845709	0.809279055034712	0.999999965386961
C2H2orf76	418.16976268792	0.723974986486874	0.337109503234773	6.5965311150228	0.830753332754959	0.999999965386961
C2H2orf88	10.806860330548	2.13608585901365	0.721901512866636	10.3172010836891	0.502100610455351	0.999999965386961
C3	10772.1779299459	1.34024196934503	0.624839088648088	12.6537950694018	0.316553972226977	0.874389256805509
C3AR1	157.08924977017	1.12166521952383	0.603752860010343	17.2118590028984	0.101763169757742	0.47565217446386
C3H1orf109	287.903994695344	0.417803122165553	0.201236390018004	6.97843927795572	0.800826834089323	0.999999965386961
C3H1orf111	13.2044114557194	1.79446436737905	0.822748956639256	10.2074155741537	0.511832240934299	0.999999965386961
C3H1orf123	1039.79500927336	0.303517558872232	0.175199426002307	8.34681044396365	0.681941332440244	0.999999965386961
C3H1orf146	3.9144992704453	1.65711732945945	1.00033221967914	6.37350675778364	0.847317314530752	0.999999965386961
C3H1orf162	49.6331423677142	1.64044391632565	0.801915406598646	10.4918238326316	0.486763438542861	0.999999965386961
C3H1orf189	18.7055512262888	0.898057570114331	0.45082845395918	8.87202224785025	0.633704034638728	0.999999965386961
C3H1orf194	5.02621784043586	2.30806931264836	1.08964691924152	14.4678641095426	0.208176620754379	0.714425554633719
C3H1orf210	217.335844271788	0.474576414441311	0.237082317439814	8.1942458973831	0.695805130386813	0.999999965386961
C3H1orf216	203.98014800025	0.696871418037247	0.228970568236869	10.9905545960037	0.444054927047767	0.999999965386961
C3H1orf226	435.922669846146	0.485552616595366	0.188533327152613	14.0222219627273	0.231766283409538	0.752516697493246
C3H1orf228	46.2133198618231	1.20182503846043	0.298992986868665	24.6616352564423	0.0102146114803296	0.1034498840504
C3H1orf43	1338.00496222563	0.343885740354619	0.160956026115561	4.37284489542202	0.957715458282375	0.999999965386961
C3H1orf50	524.778647218462	0.297511313996543	0.192151403379285	2.92446454164542	0.991686898411571	0.999999965386961
C3H1orf52	236.807312548062	0.471584892062323	0.243673706960813	3.55438297382534	0.981191001811409	0.999999965386961
C3H1orf54	319.507387783179	0.832026510723878	0.430982102673253	9.33084234176903	0.591382949956104	0.999999965386961
C3H1orf56	21.4742152517872	2.0776653263818	0.470927186178873	25.145978866177	0.00867845107987233	0.0918636688271801
C3H1orf68	1518.10542944774	1.18149193198773	0.421612777597279	8.47567494779071	0.670165668238428	0.999999965386961
C4BPA	5.86986067090686	3.49250820291121	1.18168649861951	19.4391579849555	0.0536518118217355	0.319441947143792
C4BPB	3.14707108491307	2.58991065774904	1.36779047662854	3.91248250709435	0.972407458665254	0.999999965386961
C4H7orf25	269.078591624672	0.422002129812394	0.16751334350586	9.53157662694701	0.572947427573682	0.999999965386961
C4H7orf31	0.130160614558461	0.362938410962079	7.25997055187809	0.299286801117901	0.999999911143068	NA
C4H7orf49	216.641052141262	0.492070639177263	0.232725865192682	5.5276242459102	0.902953617865079	0.999999965386961
C4H7orf57	357.957774595582	0.393464999863328	0.286847164657485	3.05866058679749	0.989927701098685	0.999999965386961
C4H7orf73	5183.14068642639	0.685594649075358	0.26719383005397	5.57442254828311	0.90019941618514	0.999999965386961
C5	25.1172758307175	1.19408721138813	0.48240027454055	10.8224303727118	0.458257313431338	0.999999965386961
C5AR1	188.947972961215	0.908453297262287	0.586683063144369	14.2943702929288	0.217130605793987	0.729456470603325
C5AR2	935.658294808894	1.35457886840203	0.331591755279751	35.3686995480959	0.000215376952223281	0.00514343163331277
C5H12orf10	608.293144118744	0.385800050135276	0.208601814334852	5.48316619012411	0.905532870543814	0.999999965386961
C5H12orf29	692.306336157635	0.51944914752593	0.189880790457941	6.66720053505554	0.825358563890532	0.999999965386961
C5H12orf4	205.483343887816	0.38127811605545	0.221370590882861	6.3973073223483	0.845584149436534	0.999999965386961
C5H12orf45	643.275225601872	0.300170962859841	0.213701942928253	2.46717014998399	0.99606422469835	0.999999965386961
C5H12orf50	0.662010113836163	0.958112609352991	3.54503049691292	4.58431633102539	0.949617510447492	NA
C5H12orf56	359.235592569216	1.01687999292907	0.488000644575133	4.58682279716385	0.949516337102264	0.999999965386961
C5H12orf57	1404.95482194529	0.522222910532488	0.214277372991164	15.3349234225835	0.167671626456628	0.634264180202522
C5H12orf66	174.392612692875	0.420082608793036	0.220347948864385	8.6855237838468	0.650894305376506	0.999999965386961
C5H12orf71	2.87731071863914	1.24949910219493	1.32623154802067	5.69981938688568	0.892623717411239	0.999999965386961
C5H12orf73	220.92534545479	0.52733374316855	0.262801539239731	8.69235250000338	0.650265684936209	0.999999965386961
C5H12orf75	285.585050016462	0.611180927128233	0.229864865609551	23.1264048766222	0.0169634350639838	0.148424399817285
C5H12orf80	1.18181317231775	1.57699582579501	2.16131037392367	6.84092703660166	0.811815327768717	NA
C5H22orf23	41.6623857904273	1.2288122054528	0.591466438372859	1.16615347015187	0.999890522263336	0.999999965386961
C6H4orf17	35.2270864574032	1.08350839969524	0.360719951734264	14.0786100119091	0.228674150667621	0.748393846318905
C6H4orf19	9.16033749732425	2.33484191216155	0.793338851698358	14.7216201167393	0.195599283473946	0.690175721202601
C6H4orf22	2.16907845150584	2.40248028963398	1.89804735121494	8.96531560369507	0.625093980007566	0.999999965386961
C6H4orf3	3660.70993715903	0.440746885910096	0.185653806881761	5.15377486436387	0.923491058999189	0.999999965386961
C6H4orf32	374.878929699148	0.814606152045797	0.258396552292257	10.0620845327268	0.524811406579951	0.999999965386961
C6H4orf36	7.06294825823499	2.39701613311646	0.739433233521455	11.6121689629694	0.393489430038278	0.953699347739036
C6H4orf48	75.5245171160862	0.723958236631592	0.463632854540353	5.14937722377169	0.923716887094887	0.999999965386961
C7	197.453397065832	2.01806448241228	0.67383044336666	39.5536738468634	4.26389371882547e-05	0.00132342114509539
C7H19orf24	311.154279417695	0.574339779087034	0.291670961936711	6.48780575164767	0.838917804738345	0.999999965386961
C7H19orf25	560.444781309034	0.444700278764462	0.165205016194238	6.53303482026075	0.835541713783794	0.999999965386961
C7H19orf38	10.6435280428335	0.974529047084246	0.950052190817498	8.01246527100542	0.712186772482848	0.999999965386961
C7H19orf43	1599.60935622402	0.381770952263918	0.207024717427457	4.59611635968344	0.949140137564002	0.999999965386961
C7H19orf44	162.569497937158	0.779180367423125	0.305596764025532	14.2316463286472	0.220439552793952	0.735122687455172
C7H19orf52	416.774877184189	0.518867392410327	0.15382909255097	12.1535415551468	0.352213405477542	0.913156178259167
C7H19orf53	2047.93109846539	0.278657813837969	0.196611998760229	6.47075387793126	0.840183014622812	0.999999965386961
C7H19orf57	79.2918754106782	0.932824027917423	0.309775995075013	10.862938014398	0.454816421947025	0.999999965386961
C7H19orf60	1149.52127985963	0.478129613348666	0.240763011416045	9.91679011559046	0.53788716112513	0.999999965386961
C7H19orf66	303.150815741088	0.780924047532895	0.28934671749107	29.8085875694653	0.00169801590944753	0.0271213937224907
C7H19orf70	1512.46026529791	0.335704889240228	0.212098643995273	6.52596959817726	0.836071012635365	0.999999965386961
C7H19orf71	274.226762430386	0.794584260819676	0.298353065622384	3.99006493878255	0.970206744984437	0.999999965386961
C7H1orf35	966.842200958483	0.559677648571813	0.246558533343073	7.02555937310723	0.797009888208757	0.999999965386961
C7H5orf15	1048.83691146529	0.618521191734146	0.237545342250483	6.10439931833264	0.866308318728549	0.999999965386961
C7H5orf24	2131.56990760079	0.509018546846701	0.201360961758871	4.48332571998833	0.953592596871617	0.999999965386961
C7H5orf30	412.458696196602	0.452880247051605	0.195497794987677	16.3593604823461	0.128305353766308	0.545901135440739
C7H5orf45	195.746881172601	0.255516176150159	0.314639409729185	0.830261308429499	0.999980550467142	0.999999965386961
C7H5orf46	1117.14669044192	1.34103519192023	0.332489621162408	15.7854440565781	0.149284955026298	0.592049679723735
C7H5orf63	238.312261213605	0.472875915240059	0.222360673756972	5.72640669091464	0.890981264992401	0.999999965386961
C8H8orf58	754.954976612968	0.574359379615831	0.228880418451495	10.3054797032685	0.503136458054416	0.999999965386961
C8H8orf74	0.375083233104119	0.431987316911192	7.24403147594838	1.5571746143192	0.999543711223919	NA
C8H9orf152	257.270362183553	1.19156660576361	0.221513553931024	52.6239217063509	2.10110048032893e-07	1.28402034943828e-05
C8H9orf24	4.22935675657905	1.95178119025717	1.05168145905376	8.65003764783395	0.654159706715714	0.999999965386961
C8H9orf3	9285.37411279	0.348537986309371	0.146693612849883	3.41435679669758	0.984040156662	0.999999965386961
C8H9orf40	228.907474270874	0.597452656606926	0.202291753057705	7.74288608460432	0.736133812102939	0.999999965386961
C8H9orf43	13.7057372788764	1.27888288391308	0.672358495969518	10.5332943780606	0.48314824359841	0.999999965386961
C8H9orf64	272.865174903284	0.551440299451536	0.296541108050738	5.74733738833527	0.889679436378855	0.999999965386961
C8H9orf72	1081.88609229432	0.420686448770175	0.202278440828985	6.84245703324052	0.811694337615004	0.999999965386961
C8H9orf84	71.3880712995165	2.01504185286821	0.616613663808383	24.8465348140053	0.00959999823865202	0.0989569226507042
C8H9orf85	306.058867905469	0.578064754942964	0.204091888797284	8.78047417100549	0.642147406253034	0.999999965386961
C9H6orf120	469.861548904881	0.383160049181143	0.123212615755586	12.2596918518639	0.344443019800466	0.9056239266545
C9H6orf163	10.3448999629461	2.23803657902653	1.04116249384156	4.11622266122819	0.966392966011731	0.999999965386961
C9H6orf203	233.670621949507	0.435701539436136	0.223555873808487	2.87981603868542	0.992220659308057	0.999999965386961
CA10	48.805069449362	0.823360416571206	0.487026278552547	7.66020014236403	0.743380381759103	0.999999965386961
CA11	235.304410506054	0.985975863482425	0.307342738762273	23.7896579458974	0.0136497346041188	0.12778281519498
CA12	3871.58627817466	0.794988203934838	0.316054828836349	3.35846751834674	0.985090430428935	0.999999965386961
CA14	2.20069665086144	2.23164258983074	1.17205472385898	7.83594878246444	0.727919615057744	0.999999965386961
CA4	510.687183892028	3.14129265303779	0.599543244061796	54.5935870956877	9.19662614415329e-08	6.1764917837764e-06
CA5B	201.825345258497	0.821829046988017	0.238696737649178	34.2302835618441	0.000331621783171568	0.00734870883924563
CA6	218.295744293752	0.871785901042206	0.358647298011489	10.688348761477	0.469729639259431	0.999999965386961
CA9	40.4193864681855	2.25944405997556	0.370665005348354	21.2396732584322	0.0309713034710849	0.225472922569001
CAAP1	574.465689056403	0.341391940179843	0.199100308215	6.31888658800108	0.851262608828975	0.999999965386961
CAB39	3636.87897351084	0.497197440234426	0.173541615944715	6.61472031461676	0.829371323802076	0.999999965386961
CAB39L	304.601349442983	0.868412726741909	0.319256131428873	13.2003584731366	0.280432097068017	0.828675207721777
CABLES1	542.03460088785	0.439847904418557	0.160835277445939	19.581130278484	0.0514269543944635	0.311091180010529
CABLES2	415.739189191775	0.334019662955195	0.13386163689715	14.3069471412089	0.216471729744304	0.728530276041856
CABP2	2.37669562640601	2.20461981377008	1.46392861215189	5.75899845975309	0.888950795119709	0.999999965386961
CABYR	244.380118715728	0.474993511949028	0.263032091046744	6.2880254890834	0.853471705243479	0.999999965386961
CACFD1	472.962301036753	0.828027031881386	0.215414962618361	18.0749293868344	0.0798581921923928	0.408466166670336
CACHD1	959.805494742825	0.371158536361056	0.118807529540783	13.2906284619351	0.274755266505383	0.819207591714913
CACNA1A	51.0303418087447	0.775089157067927	0.366533646897448	9.34595323926129	0.589992399814218	0.999999965386961
CACNA1C	242.166673066669	0.905415364745257	0.328524222244575	14.588972457873	0.202097610869166	0.702435628983488
CACNA1D	40.0826833461395	1.40062628002974	0.46659022966303	16.449770064189	0.125237511992897	0.537028494442414
CACNA1G	215.597639927879	0.846780002393858	0.280347166213488	19.5112598526214	0.0525112675713879	0.315323992453393
CACNA1I	12.3823951058648	2.00298330447586	0.83739378977888	6.41466723128167	0.844314686032289	0.999999965386961
CACNA2D1	987.322819488609	0.452358285914263	0.21293939503185	12.8263594569905	0.304825869747409	0.859677015767337
CACNA2D2	104.050823837679	0.620409214659205	0.302216957689088	8.0402578830533	0.70969310428138	0.999999965386961
CACNA2D3	168.747822883581	0.732402873099069	0.363187641672703	12.918606584237	0.298678537136611	0.852290640048469
CACNB1	174.885287563571	0.683172305550035	0.263031854659226	8.13364656297199	0.701284290737051	0.999999965386961
CACNB2	485.322551541157	0.829635809411066	0.232379288422696	18.8261831087973	0.0642858307835035	0.35866645255395
CACNB3	749.622871535827	0.31584881147593	0.193507210403095	3.57742677687668	0.980691574743354	0.999999965386961
CACNB4	52.6537750070811	1.71260408420709	0.444671663708395	19.5607282733185	0.0517414610136012	0.311938869431877
CACTIN	872.39177272169	0.463181182768866	0.150088168654954	5.56688985791618	0.900645436152092	0.999999965386961
CACUL1	1688.45376808681	0.300112379861918	0.156491466776777	5.57789386313652	0.899993527360254	0.999999965386961
CACYBP	1728.71513179685	0.595052154461522	0.250710635897328	11.0281786205884	0.440905586043303	0.997632662205119
CAD	1156.43698929726	0.550399441279857	0.194368613109102	15.9914555716188	0.141448385711471	0.573664743204931
CADM1	1635.07027163841	0.287123820593891	0.14325938586139	6.90711780664259	0.806554618719846	0.999999965386961
CADM3	588.774926840024	1.10715699861942	0.343364062323656	14.2848061163382	0.217632682325503	0.729963312055836
CADM4	173.268481652873	0.429383527326413	0.240421567900825	7.54330665292287	0.75353500083577	0.999999965386961
CADPS2	569.945188600545	0.610174696370154	0.270129678957534	13.1239869306731	0.28529901879057	0.835520849490857
CAGE1	77.6555538099505	0.793496840276863	0.42003515461643	5.85791263272677	0.882674411950749	0.999999965386961
CALCOCO1	3089.07672608895	0.558555502266402	0.183765067848612	10.4415671557741	0.491158849401513	0.999999965386961
CALCOCO2	2561.99721655423	0.612354175795723	0.169043059560052	24.0289887075326	0.0126115404856263	0.120763938528542
CALCRL	705.749831403818	0.854479008634206	0.278687677576877	13.9161248484683	0.237669439951088	0.761579423442032
CALD1	18150.9371988444	0.393968001385699	0.141253057124638	8.33361339768214	0.683144144233314	0.999999965386961
CALHM1	4.25216857429782	3.03221576976956	1.13745011578602	15.2772368383383	0.170153441037933	0.639350661207646
CALHM2	549.646495739979	0.610634439595161	0.184252446489846	12.3538519057202	0.337641433652991	0.898729752502002
CALM1	13794.0010872414	0.375925872421713	0.177702923924477	7.85434540648714	0.726288934707325	0.999999965386961
CALM2	18542.1071175826	0.644006779690029	0.2635709916135	9.53128827802004	0.57297384461178	0.999999965386961
CALM3	2407.20482786866	0.30946682175819	0.147236472071957	4.57787496073161	0.949876956085597	0.999999965386961
CALML4	243.056597033105	0.543366093817836	0.19248237553634	13.3651975057867	0.27012775963785	0.813027539638056
CALML6	5.54626045602062	3.64352121275085	1.02559641240475	21.1588656169676	0.0317620193223088	0.228907092956062
CALN1	81.7603909223508	1.33631816327382	0.476549647917626	21.7943537958154	0.0260156975459048	0.200523656995031
CALR	14879.3690220303	0.547879633418936	0.191889976567555	23.2904035718689	0.0160801050206533	0.143308109871565
CALR3	0.620906138129808	1.01659331248695	2.43718211813886	4.16368625983061	0.964881694100776	NA
CALU	3009.91892841211	0.749502528880264	0.267439217541696	17.6216503830578	0.0907851071468967	0.443541749593865
CALY	18.2948120073547	1.35376952081695	0.639696103436212	16.3673409575142	0.128032031092838	0.5456821112941
CAMK1	342.033355031786	1.04455994051201	0.300616442619094	20.8869269375948	0.0345616295098939	0.241641121752121
CAMK1D	1185.04206154309	0.668905071486639	0.197076640284442	12.1892612565734	0.349586574261388	0.910906263682455
CAMK2A	9.53074478258429	3.27594563874936	1.07397674271521	9.4781373005209	0.577846776441092	0.999999965386961
CAMK2B	77.6712192789609	0.916763465174407	0.294956813496602	20.8118110464677	0.0353739968157503	0.245361124194689
CAMK2D	2085.21857484895	0.510827305238721	0.181896012565284	16.0412860564162	0.139605058123464	0.570895331203976
CAMK2G	1352.47867991296	0.430521971015495	0.103246178194748	25.5702526864292	0.00751560553532334	0.0832529834134371
CAMK2N1	289.044142343239	0.535488954985813	0.228682099152188	13.7251120656528	0.248579061806702	0.778783438661405
CAMK2N2	42.3514256852266	1.6362578953967	0.412282034089221	26.4899393634309	0.00548357541488356	0.0661998754687599
CAMK4	81.9072554006131	0.346753527805186	0.456261978653205	3.70902362119733	0.977669135168722	0.999999965386961
CAMKK1	942.656017419061	0.647084729956188	0.187568060970875	16.4707258257872	0.124535332351635	0.535300626914696
CAMKK2	282.881388546901	1.12126538191775	0.351007991793637	6.28294826609442	0.853833742686063	0.999999965386961
CAMKMT	74.736817004623	0.926261745517609	0.386029414248789	6.88664868706354	0.808187203129339	0.999999965386961
CAMKV	15.3217327446194	1.72008598642573	0.52746651264157	18.1918546231781	0.0772343452293911	0.400765730537451
CAMLG	585.673936497645	0.36395137049396	0.191690569962802	3.70125142809212	0.977855808012966	0.999999965386961
CAMSAP1	1541.64399186297	0.295129973015876	0.170803391771962	14.4678475080731	0.208177463678715	0.714425554633719
CAMSAP2	3403.74990727812	0.330585221373673	0.122709468779822	14.5414920161091	0.204464195279981	0.707111628880608
CAMSAP3	2569.25057759813	0.463607486111678	0.21357625147502	7.41931366545714	0.764181565353434	0.999999965386961
CAMTA1	739.3817121649	0.546755939358912	0.182557232216981	6.07710004940043	0.868170651559118	0.999999965386961
CAMTA2	1554.17624589331	0.461131583894471	0.250454636331756	5.68551229530226	0.893502341980673	0.999999965386961
CAND1	3764.15307098162	0.314688647973458	0.160142402536317	9.28145102041731	0.595930600297582	0.999999965386961
CAND2	178.256890636995	0.668482422288882	0.299566991194356	7.14532943980959	0.787195228579616	0.999999965386961
CANT1	680.297906843812	0.428497639954856	0.159675211222481	5.20568695740303	0.920797271291999	0.999999965386961
CANX	9979.47354523731	0.471853265234931	0.149836285721019	10.8699535417386	0.454221700419097	0.999999965386961
CAP1	7830.67446302399	0.200301387526774	0.140358266664774	2.15419991603005	0.997876683763816	0.999999965386961
CAP2	162.550800813599	0.773889841388548	0.247037757128741	23.0285948916255	0.0175117247445339	0.151737437042245
CAPG	2537.94831383847	0.621520370721743	0.275289878952932	9.47065924919821	0.578532911437223	0.999999965386961
CAPN1	4137.7418510907	0.300113163811329	0.124953505260392	7.81228482605013	0.730013913228101	0.999999965386961
CAPN10	445.852510099014	0.352283817788233	0.188331942298657	2.94785053557388	0.991397252061418	0.999999965386961
CAPN11	49.1646258654764	2.40090616707657	0.525835744038032	33.1188229135672	0.00050333407298911	0.0102532172756519
CAPN12	1125.64299466154	0.959460460806062	0.277004627944849	20.1421154810715	0.0434293486302742	0.279114925938646
CAPN14	15.0222412564901	4.01957235814876	0.887085739340185	66.1330830807417	6.59311005358953e-10	7.45627699049051e-08
CAPN15	660.262922698647	0.503972056675918	0.246870500122929	3.32985083609179	0.985609491512101	0.999999965386961
CAPN2	3582.52915900684	0.507282990502904	0.194061451064225	22.4457142920934	0.021138889540677	0.17315828014176
CAPN5	518.405541665907	0.804602087232083	0.256142814319219	8.80510273154397	0.639876722215622	0.999999965386961
CAPN6	151.945003084441	1.51657293540003	0.413185998921369	28.6067650956557	0.00261144143523729	0.0380447227987811
CAPN7	836.362617339592	0.253607411225201	0.138997101733219	8.09500075256881	0.704769359764643	0.999999965386961
CAPN8	675.669360364534	0.843540166304801	0.383503951646082	9.02628147828955	0.619466327973219	0.999999965386961
CAPNS1	3421.6016714624	0.510740754147408	0.196278897175606	18.8230047363353	0.0643455672732329	0.358785516968198
CAPNS2	1555.44081395833	0.608227179958632	0.256143746074868	4.76006341045235	0.942227244185218	0.999999965386961
CAPRIN1	5785.46622820034	0.252639864395032	0.136117337139239	4.82675053026571	0.93926552269216	0.999999965386961
CAPRIN2	685.836912497788	0.346577613671758	0.295269791732629	2.60676000681201	0.994969820507042	0.999999965386961
CAPS	110.845555908509	1.48972181564507	0.371012554769084	20.9130008548789	0.0342836768550453	0.240254342291161
CAPZA1	5620.75179593414	0.482918825820937	0.21231652369637	5.2374691561655	0.919122643517552	0.999999965386961
CAPZA2	2380.9418242921	0.607498823688419	0.242799007677113	6.24851783316251	0.85627833338288	0.999999965386961
CAPZB	825.325128962769	0.473966793186196	0.228731403430375	1.60829278229181	0.999466465003073	0.999999965386961
CARD10	453.820423234755	0.411682488183738	0.184255189192272	5.45019900435352	0.907421912253637	0.999999965386961
CARD11	188.919889282746	0.704037513427613	0.295754831191891	20.0686041533038	0.0444086555119123	0.283357173528992
CARD14	408.165548855657	1.29872253300281	0.401449937046035	32.9047646988995	0.000545185233887651	0.010891527951717
CARD19	368.436659246027	0.626594950974513	0.245319703125941	15.6637575485621	0.154079889877281	0.601949607932262
CARD6	315.98971685567	0.294209704299818	0.263059469652326	5.15270395016705	0.923546086862504	0.999999965386961
CARD9	161.731519522532	1.05872941614153	0.42182819671065	12.6659435961583	0.315718604562371	0.873296626072622
CARF	346.231990113648	0.486839891010332	0.236237796708385	6.53677309059668	0.835261371232633	0.999999965386961
CARHSP1	2689.27517806273	0.337567253472581	0.148040441232759	5.12690643471262	0.92486501530372	0.999999965386961
CARM1	860.07583002501	0.366606733761375	0.145216404757524	3.11499705606673	0.989117106802446	0.999999965386961
CARMIL1	1100.15216965769	0.552707431074252	0.167577609254402	21.2254855722928	0.0311088046634994	0.225972335979454
CARMIL2	63.6110405070836	1.08664969939886	0.350641196147276	11.3087738447178	0.417769525328901	0.976466174061304
CARMIL3	54.8111136817299	1.1600300748573	0.434570008185695	6.99194372215169	0.799735539252909	0.999999965386961
CARNMT1	947.665599925999	0.780568156131752	0.23622060150082	10.4235291300144	0.492740187695214	0.999999965386961
CARNS1	12.7813553792021	1.97646625571734	0.73207245863563	10.8151470952428	0.458877237986569	0.999999965386961
CARS	2504.00802207074	0.81524919429415	0.154462323152779	31.7617081014542	0.000832836038898892	0.0154463219353934
CARS2	707.147738793658	0.383921985129018	0.170733788760902	7.11606110021182	0.789608231686314	0.999999965386961
CASC1	73.0030376189045	1.13628826924188	0.318525666075116	18.0173687641552	0.0811784709324064	0.412346399330897
CASC3	2155.20400104681	0.223489895770814	0.107709660123085	5.25796555537841	0.91803247114024	0.999999965386961
CASC4	2223.51997631353	0.347568735603824	0.155241444686295	6.03104971842623	0.871284503539296	0.999999965386961
CASD1	925.233769568032	0.300891016936162	0.188935453167981	6.32894883005127	0.850539190420703	0.999999965386961
CASK	1880.55890600753	0.452742706056294	0.148865354287567	6.48277916070111	0.839291202277459	0.999999965386961
CASKIN1	50.2871253888321	1.37451598560567	0.389877183387188	19.4548063447641	0.0534023961161293	0.318923323451652
CASKIN2	739.391035103555	0.523433332062333	0.236232306005245	6.25426537350035	0.855871531476543	0.999999965386961
CASP14	6843.77032331033	0.638605727199178	0.208503678774098	31.1104991143397	0.0010579002468929	0.0186535493354466
CASP2	723.430596666165	0.312203863906294	0.118129139233456	14.2585444018454	0.219015878803883	0.73253212662137
CASP3	914.260021115715	0.577248841401059	0.222131581794712	8.8649642025681	0.634355240175683	0.999999965386961
CASP6	718.761535129905	0.692919281637923	0.299512179309276	4.84720903781783	0.938339547050403	0.999999965386961
CASP7	311.922233322599	0.560209065291511	0.172646920720151	23.8450147862607	0.0134026731726075	0.125889165962086
CASP8	568.311596874039	0.626105128935126	0.290958616351412	12.5470080502581	0.3239599497002	0.883811996660636
CASP8AP2	855.302433183722	0.538055168085376	0.206877927300182	11.7205049354146	0.385014441208179	0.942679379631026
CASP9	404.754787330879	0.336278361484293	0.140942451036472	9.50772070813866	0.575133691562481	0.999999965386961
CASQ1	9.63829539819552	2.11518643137212	0.910483425074427	6.88088300238442	0.808646142950857	0.999999965386961
CASQ2	173.752983546029	2.74370213337698	0.704066844938516	21.4059792234557	0.0294008268132004	0.219155903986503
CASR	58.0063183800345	2.55597442789919	0.560788105134891	9.36324439773279	0.588401693517168	0.999999965386961
CASS4	53.9571677059853	0.966318324329117	0.52064630791157	8.957093008355	0.625852968202211	0.999999965386961
CAST	7963.79849091807	0.412929127219977	0.179327787423613	7.27556900619913	0.77634845294398	0.999999965386961
CASZ1	4843.9212183979	0.407824242613762	0.210701086853474	13.4842614249006	0.262855138396507	0.800195453800505
CAT	2947.60357174435	0.585124919837622	0.193579451999389	23.285289687189	0.016106984421258	0.143417755403401
CATSPER2	53.3198594446993	0.520218345772028	0.324657156880268	6.77450647256217	0.817039348301393	0.999999965386961
CATSPER3	4.53388998673794	1.41533289854338	0.990364291081926	7.54787598188554	0.753140138165876	0.999999965386961
CATSPER4	218.284193677879	1.03360367926849	0.425103461215842	9.07983310409901	0.614523444578892	0.999999965386961
CATSPERB	5.95330296014014	1.45836525966855	0.961158845297482	10.808475618483	0.459445421033922	0.999999965386961
CATSPERD	62.2138193001084	1.01746792059527	0.387328750927472	6.63613921599216	0.827738105208814	0.999999965386961
CATSPERG	113.146213378618	0.651513239376398	0.355369892298202	4.52863555863922	0.951833610558606	0.999999965386961
CAV1	5822.89180728033	0.897828492712164	0.254982705722857	21.574317508895	0.0278863926418707	0.210651990175329
CAV2	1461.93355910036	0.846582943711423	0.272379709653343	9.93965170368176	0.535823587789818	0.999999965386961
CBARP	479.560623293507	0.761604137458435	0.207311270224535	18.7074010470081	0.0665522550493121	0.365845345642871
CBFA2T2	640.376748873799	0.397171851713502	0.214045549100999	5.18580942787668	0.921834834288447	0.999999965386961
CBFA2T3	505.449786048691	0.863467618978503	0.244058870780603	26.199186960756	0.00606116280914004	0.0709527434611884
CBFB	2267.8953999765	0.429164579174585	0.150038549415898	6.12477877348732	0.86491015853936	0.999999965386961
CBL	1560.73621748693	0.578040418297197	0.247230131987454	8.33814511968939	0.682731182621589	0.999999965386961
CBLB	689.825642760324	0.578910787791145	0.265584209283048	11.2956886872061	0.41883427533735	0.97724859250922
CBLC	264.396189911519	0.444014504439575	0.195905790057266	5.78311867799226	0.887436051560415	0.999999965386961
CBLL1	777.864988220592	0.544307652757441	0.176657006465045	4.94081075410173	0.933999132306676	0.999999965386961
CBLN3	54.7795313743974	1.23006355815203	0.359251181344399	23.777940926342	0.0137025760579516	0.128155556876603
CBLN4	247.68188403174	0.675408211080219	0.229414514203007	16.1583604582596	0.13535288689299	0.562200647483647
CBR3	770.032644336126	0.605420706237748	0.276337231197541	7.91581927836722	0.720824208721724	0.999999965386961
CBR4	1114.60007624931	0.485226497321997	0.172080458881782	5.7705789674917	0.888224817834638	0.999999965386961
CBS	2552.10485496669	0.773708108809451	0.192785255301434	16.9893333929057	0.108191498576469	0.493393350866225
CBX1	2504.59760754288	0.158888705146156	0.0899399923049462	8.8114308870953	0.639293180911166	0.999999965386961
CBX2	520.950558381203	0.911918157135887	0.209851525792381	44.8008183364002	5.2595252356791e-06	0.000216520789932413
CBX3	4343.81993271823	0.493196137369905	0.229280300076673	4.27756188624994	0.96108309786938	0.999999965386961
CBX4	766.78638246396	0.363312530823883	0.160992860567987	10.8212406250771	0.458358554229866	0.999999965386961
CBX5	4342.61593584668	0.403234872645063	0.177577703261515	10.609879304159	0.476500752410367	0.999999965386961
CBX6	761.703263068456	0.753758403084758	0.233160631851976	10.2688351047258	0.506379769632696	0.999999965386961
CBX7	1077.72515804591	1.23655135221079	0.232199710860378	45.622217671019	3.77007369789248e-06	0.000166713506128378
CBX8	416.310594489424	0.235821715507257	0.182806980748984	2.15935885918594	0.997853142660564	0.999999965386961
CBY1	193.203849106743	0.574876274580277	0.365946603105697	2.4688050965089	0.996052513305371	0.999999965386961
CC2D1A	975.372884561011	0.421485168879706	0.16397897164475	7.21470606262056	0.78143911977076	0.999999965386961
CC2D1B	1979.16463001926	0.242713509071265	0.105535413760736	13.8986253837826	0.238653809541504	0.762891200669955
CC2D2A	448.671438952312	0.418146294239508	0.253554815738896	6.39600006338441	0.845679563404951	0.999999965386961
CC2D2B	5.84581884144492	2.330925039995	0.812775085123097	13.8104485620292	0.243660183789972	0.770859340292456
CCAR1	3483.5968537759	0.367031347036606	0.17828678772035	11.1376772534502	0.431802283209856	0.990211552150511
CCAR2	4210.67414031485	0.298104213681087	0.143123894581874	3.78538638763132	0.975779550995891	0.999999965386961
CCBE1	75.9062817219691	1.706434926748	0.543112771209304	6.96127836397125	0.802210529798234	0.999999965386961
CCDC102A	450.281760792136	0.432132509809426	0.213131658798569	5.92348735606646	0.878420270992331	0.999999965386961
CCDC103	13.815073291099	1.22289100788697	0.510874342085642	22.7008839653966	0.0194722125417393	0.162983495702402
CCDC106	547.088858795515	0.678480583313033	0.194071034375535	10.3707043686696	0.497382312945173	0.999999965386961
CCDC107	283.291127327896	0.647896143619498	0.242048523425112	10.9095903070032	0.450868371168919	0.999999965386961
CCDC110	1.99400498318171	1.87229135329766	2.14354080955398	6.06352688265238	0.869092071146444	NA
CCDC112	388.161967028286	0.450853354032111	0.25647442223138	4.65491555670349	0.946721040573617	0.999999965386961
CCDC114	117.677771841542	0.982650298792271	0.287241721949293	13.0685384249609	0.288869394308285	0.840952977239393
CCDC115	606.273822106168	0.537987215615719	0.238293369472039	10.7750425890789	0.462297540558124	0.999999965386961
CCDC117	1328.79962520405	0.475320567674108	0.131453962295487	38.343125406433	6.84591269899534e-05	0.00199181390441543
CCDC12	1509.15392391656	0.240350134952976	0.140188959383467	5.03214656857222	0.929599774846034	0.999999965386961
CCDC120	1230.02334709665	0.25992607311974	0.261653917231074	7.32227844470032	0.772416542025159	0.999999965386961
CCDC121	43.0472220417062	0.697162917078584	0.358241820071349	10.7064280333139	0.46817546196361	0.999999965386961
CCDC124	1281.07923403772	0.442777808105891	0.259718877222122	4.62045923484146	0.94814678942308	0.999999965386961
CCDC125	359.832732566605	0.423686511747115	0.197114482286428	6.26351818927799	0.855215553167992	0.999999965386961
CCDC126	181.97660851691	0.517663371380055	0.221505419055644	11.7616469837991	0.381823587636522	0.940198381722735
CCDC127	582.131203669688	0.344831033543222	0.140123876556088	6.33824005533046	0.849869838194798	0.999999965386961
CCDC129	217.728218306258	1.68910736848373	0.502550004140574	12.7059880282828	0.31297542878213	0.870565982486021
CCDC130	243.0626981517	0.366389272254013	0.17937063728812	6.05305404127603	0.869800958142895	0.999999965386961
CCDC134	359.337224496108	0.408417019209661	0.183648967548757	8.36542673432086	0.680243543944715	0.999999965386961
CCDC136	90.7858152174293	0.723223087036218	0.402742771528639	3.3807676217437	0.984677195090786	0.999999965386961
CCDC137	514.966925421647	0.45212167442106	0.206094127205181	4.22592070002185	0.962836067327289	0.999999965386961
CCDC138	529.204805030153	0.637380180942962	0.21967187619386	8.41756780996275	0.675482060880277	0.999999965386961
CCDC14	193.541371878815	0.973998525286993	0.240561897090209	15.6081027240226	0.15631469791336	0.606852876750292
CCDC141	21.1627336819827	1.72107766109782	0.627450918874202	12.2862861061712	0.342513288799129	0.903680140581111
CCDC142	206.411752552808	1.16615480497047	0.328295173567213	6.94167808493967	0.803786663109886	0.999999965386961
CCDC146	103.217097392162	1.14058458313916	0.341446282749673	21.8029498929781	0.0259450339182142	0.200135781043755
CCDC148	9.31738021400262	1.46588574174422	1.11537814617096	4.4170359288384	0.956094569721728	0.999999965386961
CCDC149	412.049258928312	0.400911746273885	0.181460011018625	12.4046224705708	0.334009858550235	0.894848979761804
CCDC15	151.852501953984	0.344197004360213	0.228445207151679	3.66916840420311	0.978615441216892	0.999999965386961
CCDC150	26.2694694641886	0.800541135983264	0.441923829479377	7.75822871329873	0.734783718741527	0.999999965386961
CCDC151	20.8749607789835	2.09210543959258	0.587800593759174	20.669205903287	0.0369646744739331	0.252041186520463
CCDC152	0.633027162137269	1.38927820508597	3.87647888926202	3.72985776719534	0.977163615041709	NA
CCDC153	3.92276904371853	1.31939625217214	1.18557537227186	6.35069244380773	0.848970702379172	0.999999965386961
CCDC154	130.561131545124	1.23390584784583	0.402548072956833	9.34140951815965	0.590410486526346	0.999999965386961
CCDC155	564.644580088935	1.044223236466	0.288348226962471	17.7901046328548	0.0865804557659014	0.429944480323233
CCDC157	53.1370312015917	1.02692485238593	0.384621769331264	12.408659617623	0.333722165793312	0.894682345175686
CCDC158	102.935390307041	0.9349611488636	0.365721679958547	15.5350626590653	0.159287822441839	0.613038484257872
CCDC159	63.7367643297085	1.04338253927118	0.351442615995966	11.1943142817989	0.427130845539972	0.985048266325359
CCDC160	21.7298837392139	3.63181688989548	0.791056875720918	48.3763397903598	1.22313098513684e-06	6.23543303770017e-05
CCDC167	616.083943175038	0.454528941349559	0.237752680799286	11.3939280840488	0.410875374271034	0.970263484328021
CCDC169	0	-9.96578428466209	NA	NA	NA	NA
CCDC17	142.316718685131	0.414409333232843	0.28430319215878	6.52608995672523	0.83606200176864	0.999999965386961
CCDC171	79.8648657734098	0.891999755457575	0.346046122477565	8.09998688749585	0.704320126790648	0.999999965386961
CCDC173	33.5730468891899	1.18503439041462	0.464431969349317	13.9669749019729	0.234826283730203	0.756949132423837
CCDC174	654.764092437866	0.397181679354298	0.126395028628143	11.8923893117986	0.371786140685227	0.930452025155784
CCDC175	2.01781824472428	2.23164258983074	1.72275426620175	5.11467764842087	0.92548575968873	NA
CCDC178	0.0444090593936763	-9.96578428466209	7.25997055193951	-1.00697097731574	1	NA
CCDC18	775.399866337981	0.361865609368563	0.168234021243558	7.326627851757	0.772049334206929	0.999999965386961
CCDC180	3.72574002775333	1.77403603511073	1.1426101723498	9.73654378937371	0.554229445820878	0.999999965386961
CCDC183	252.372383406714	0.615830585354653	0.275673147219617	12.7880802699979	0.307401806862625	0.862784522733386
CCDC184	103.296678479762	1.06894251951082	0.42846336970094	7.87108530434148	0.724803203436608	0.999999965386961
CCDC186	2599.71610981434	0.378079422634435	0.226557774318248	4.18822427364773	0.964083841632342	0.999999965386961
CCDC187	381.293704858653	1.73904784967389	0.428855326734076	23.2695421466697	0.0161900213319406	0.143846011251696
CCDC189	83.6095037097366	0.575071707496657	0.386553087654449	3.28346635043641	0.986424353670516	0.999999965386961
CCDC190	53.3844992603761	1.50209432399227	0.371260820896585	45.0185881287863	4.81579009549194e-06	0.000203080793804989
CCDC191	126.251947812689	0.691480033360986	0.234501789574873	14.9727339778603	0.183748587664814	0.668974044045923
CCDC22	393.988199944155	0.2190919542505	0.155585053443889	3.41684770763101	0.983992210848325	0.999999965386961
CCDC24	126.341745999722	0.608400044708812	0.23805365969032	15.7519230193364	0.150593382392812	0.594037356855451
CCDC25	2057.24045877271	0.227388832264639	0.112490895464801	5.9489357626943	0.876749571498027	0.999999965386961
CCDC28A	323.88989190566	0.405763875184451	0.185989335753111	7.98676250651079	0.714489135664321	0.999999965386961
CCDC28B	336.473851570412	0.892181964419507	0.278632229396689	4.90202035689765	0.935818562762656	0.999999965386961
CCDC3	3942.67718201416	1.03749521655078	0.190951445340128	59.4704095121215	1.16273659619165e-08	1.02144333660086e-06
CCDC34	411.676325676971	0.921120343837441	0.327918041193894	6.13559715104066	0.864165222628911	0.999999965386961
CCDC36	37.1374259643053	0.990765218799311	0.380690309114896	10.2153179377815	0.51112958528623	0.999999965386961
CCDC38	17.4647622054169	1.41640566560108	0.643303819744445	8.91088534363109	0.630117814641241	0.999999965386961
CCDC39	218.090046639408	0.934451493190683	0.336792548801933	18.9185876032392	0.062570633256882	0.352422314365517
CCDC40	12.4150340595547	2.02411636871445	0.763674561574943	12.542428612856	0.324280070226222	0.884396055156842
CCDC42	0.141253875195563	-9.96578428466209	7.25997055193951	0.152044017908018	0.999999997719489	NA
CCDC43	482.405378976028	0.453899498332035	0.16842442716083	9.48795615263515	0.576946062333758	0.999999965386961
CCDC47	2545.93304314185	0.298650803910012	0.134641513465292	8.70673472317281	0.648941476715217	0.999999965386961
CCDC50	421.274206239332	0.389002599086068	0.180979298822846	7.31308664518235	0.773191976598215	0.999999965386961
CCDC51	343.196416740005	0.492491632427477	0.159265651679599	13.7790373167246	0.245462306724195	0.773235463154413
CCDC53	784.037908998502	0.375937956254061	0.185663266570047	6.9129785934046	0.806086235770275	0.999999965386961
CCDC54	0.327971248730958	-9.96578428466209	7.21009535343049	0.884597187214631	0.999973057643222	NA
CCDC57	217.750644739535	0.430726367720633	0.294228180926051	4.11040440610532	0.966575330197226	0.999999965386961
CCDC58	511.40319375982	0.556091412611343	0.321726381845875	8.97557753274077	0.624146734133065	0.999999965386961
CCDC59	662.404083564873	0.628622261992459	0.270241237633151	8.72574294991739	0.647190850974998	0.999999965386961
CCDC6	2526.06664687477	0.293087369965263	0.138472411946299	12.4787231303039	0.328754783608611	0.889547630520205
CCDC61	630.862864766679	0.406114567941072	0.212153043844553	7.05003113099195	0.795017519763504	0.999999965386961
CCDC62	184.596470348933	1.28006762658444	0.206053865862533	60.5909112483258	7.19999751461435e-09	6.77902158337709e-07
CCDC65	8.78875819785562	2.53951488628002	0.774357958205292	17.7715406143551	0.0870353152870848	0.431167349927857
CCDC66	350.351100717227	0.406810937693317	0.233231600536704	3.85482910077621	0.973972657572392	0.999999965386961
CCDC68	72.2378641244504	1.24167797489613	0.412428910173211	12.2828276649672	0.342763852842253	0.904021859835124
CCDC69	81.9637181174705	0.565637049910414	0.409529346398103	3.89324841897371	0.972936245193532	0.999999965386961
CCDC7	11.496508121175	2.46711207024307	1.10601173753773	3.46741983889436	0.98299754524657	0.999999965386961
CCDC71	482.652614053289	0.319300325418976	0.175346527325917	5.26099694957617	0.917870558063771	0.999999965386961
CCDC71L	716.204754336275	0.353677705086521	0.150325228950026	5.9359027640815	0.877606564498917	0.999999965386961
CCDC73	252.051163038584	0.725144825990406	0.301212434582854	3.11083573580117	0.989178483269065	0.999999965386961
CCDC74B	16.2055791273822	1.13579788273915	0.622873924337328	9.81228986431717	0.547346808788874	0.999999965386961
CCDC77	481.50706142512	0.398810855217337	0.141422713742873	7.76039229708192	0.734593197592244	0.999999965386961
CCDC78	25.2123904131025	1.54564501646824	0.542874638656069	11.325853222465	0.416381901251142	0.974365610478798
CCDC8	1314.2332935069	0.951017777506544	0.239907313841896	28.4790009875977	0.0027326831529648	0.0391366368879486
CCDC80	5581.06165881306	3.92847497465175	0.671369345226074	45.0089757164546	4.83457232423702e-06	0.000203279303838325
CCDC82	1096.1390430196	0.718291974789726	0.171103585230282	28.4792410020053	0.00273245038530819	0.0391366368879486
CCDC84	281.120040273567	0.541401129464753	0.162391534589798	18.3684569550394	0.0734155394145461	0.389399187223568
CCDC85A	115.727521615059	1.3130541923957	0.246245542754183	41.0906944067494	2.32495075179302e-05	0.000786089018793522
CCDC85B	494.562497200418	0.476790128258384	0.221335248291622	6.70810081345309	0.822205530298971	0.999999965386961
CCDC85C	1578.34437329676	0.575881063026738	0.197349055813394	18.2539688048333	0.0758716538165858	0.396653135973107
CCDC86	522.188474805844	0.462655374844678	0.158304366852672	11.9260541604287	0.369227112006115	0.927910701694748
CCDC87	1.06478720344166	1.17352729551568	2.74631258871234	7.43202608399679	0.763096257666724	NA
CCDC88A	624.607337002259	0.506553932859715	0.242375304200938	7.48384419091059	0.75865741186398	0.999999965386961
CCDC88B	78.8618852869311	0.989328739937593	0.579895924961984	12.6032752532064	0.320043579083782	0.878745719709486
CCDC88C	508.135581039678	0.74116495499534	0.274548458610463	5.09864018209333	0.926295475883031	0.999999965386961
CCDC89	90.1847537367006	0.806604106614042	0.518402080619598	6.60451276466529	0.830147450875463	0.999999965386961
CCDC9	1107.06372787236	0.681250884850351	0.25018093948006	8.38028106108362	0.678887981071257	0.999999965386961
CCDC90B	1058.25248731464	0.295871334058821	0.244225670853831	2.86041118212074	0.992444893268357	0.999999965386961
CCDC91	962.415381743002	0.400437171121332	0.218152355988774	3.20914085695591	0.987663084961323	0.999999965386961
CCDC92	260.963561230225	0.739561767767794	0.208723604205346	19.6674244486944	0.0501157153918459	0.305601812048573
CCDC93	849.89831559574	0.365438983633553	0.134926997216946	14.4750993626618	0.207809509099697	0.713833538530318
CCDC94	409.040703677604	0.346411419427393	0.144315871054093	15.6063538692766	0.156385351051973	0.606852876750292
CCDC96	54.4357525747946	0.790859631265685	0.40831655673744	6.13468009061177	0.864228443066194	0.999999965386961
CCDC97	989.529201032146	0.420253656833657	0.166569906423184	5.30598111830329	0.915447380920307	0.999999965386961
CCER2	289.23788353813	0.910141519421889	0.276861067686361	22.5687101504757	0.0203195581346887	0.16857009484587
CCHCR1	580.040427817444	0.402401554264478	0.197411165203964	15.9101779300262	0.144498388445315	0.581260055851913
CCIN	6.87151323758822	2.23717406260175	0.98217455917008	10.2115718384142	0.511462636703652	0.999999965386961
CCK	17.8613613638204	4.59720209362967	0.851491336899983	35.0674550425001	0.000241532029181918	0.00564473547534652
CCL16	5.83261180338664	2.03875630570085	1.32955368811962	6.84768921546652	0.811280362959005	0.999999965386961
CCL17	2.22710377817273	1.701169024216	1.70799457663533	12.2922547214723	0.342081135207783	0.903063527384605
CCL19	109.331610366716	3.52307110173428	1.0528553267488	44.5433359943124	5.83650235036651e-06	0.000238279446577826
CCL20	102.735464110312	4.50911722166266	0.712484018525805	79.7527956786429	1.64739998503246e-12	3.02967634630549e-10
CCL21	578.493910827789	1.07016232167271	0.454105653322463	14.5441288907815	0.204332201298567	0.707111628880608
CCL22	37.4282851846753	2.49886340505078	1.26836068466839	15.274908541899	0.170254229825172	0.639607242172536
CCL24	169.563335551737	1.3443974403733	0.483945743865874	12.0371947209009	0.360853915831663	0.921817168524442
CCL25	37.7510267714642	0.938157752937986	0.701147206802048	3.0974116034339	0.989374837190985	0.999999965386961
CCL26	1426.4912818402	2.22852811834449	0.354094086360227	58.296766569465	1.91784629279207e-08	1.57869897835794e-06
CCL27	2384.81974875028	0.863025574528907	0.243539086828726	27.9798032197259	0.00326048286778934	0.0448669803303207
CCL28	7.92593070859443	2.94917834844772	1.02460659587237	11.3423980078244	0.415040028713635	0.973643743258344
CCL5	27.2802999098601	2.20604566406516	0.974450298344699	10.6371159268388	0.474145856476782	0.999999965386961
CCM2	690.66779039805	0.267517620473395	0.197352660620746	3.49501598110277	0.982437550761643	0.999999965386961
CCM2L	148.448094375048	1.2459390361578	0.289238148838192	29.2070447287705	0.0021079152997906	0.032154695557581
CCNA2	587.513392155833	0.702289863690609	0.205951367533259	15.7515652563177	0.150607397771717	0.594037356855451
CCNB1	772.315820018882	0.674286335839405	0.235448231201784	24.4746874515981	0.0108738246786359	0.108068243447574
CCNB1IP1	112.817852793585	0.62624257418423	0.230508814187336	7.1370699960616	0.787877107805395	0.999999965386961
CCNB2	280.801993001561	0.867281305756045	0.249865769708029	14.1602262002042	0.224253983287872	0.74129012159337
CCNB3	269.14086891446	0.503076892369325	0.229985858092368	6.44501256609902	0.842084979194466	0.999999965386961
CCNC	1599.96790584226	0.612841207291096	0.235985879539109	4.6571643239605	0.946627186813311	0.999999965386961
CCND1	5632.06525285723	0.237459614937206	0.114074155077343	6.11245756197536	0.865756275737051	0.999999965386961
CCND2	8281.01167926216	0.515688006009017	0.23614789556439	10.6796535641824	0.470477910316997	0.999999965386961
CCND3	1079.13598378662	1.16747006229827	0.277749041130307	30.0545175487119	0.00155365634106138	0.0253506214588771
CCNDBP1	1584.09305018588	0.29983569387829	0.104352952218846	15.8273494069566	0.147662468321017	0.589033458670376
CCNE1	69.6650206890938	1.11020080400659	0.33323644756067	19.2324996197815	0.0570456242585853	0.332802785105378
CCNE2	188.422301595505	0.974970910671033	0.333881855716688	12.4765786366989	0.328906109515381	0.889547630520205
CCNF	285.943851171967	1.01186139274521	0.255598748150137	24.1490931978337	0.0121190701263961	0.11741952828519
CCNG1	4422.31841236574	0.740318187195948	0.253963335383002	15.8789628118093	0.145684160538348	0.583388870792351
CCNG2	994.977318023618	0.465590819688476	0.20462397739359	4.43979144458638	0.955245263506035	0.999999965386961
CCNH	495.255893352667	0.360250910096991	0.189184494319858	3.82945038334645	0.974642879736283	0.999999965386961
CCNI	5673.20586068122	0.485976661352964	0.166570687482405	14.7522636832631	0.194121656683341	0.687432666895937
CCNJ	417.940443901967	1.03549120987083	0.300919708820393	13.0808147061649	0.288076245946414	0.840065851768455
CCNK	523.322546582898	0.353226280198207	0.117100394490127	10.1277829418918	0.51893098436348	0.999999965386961
CCNL1	1942.52156637195	0.539278758675902	0.158458660383574	7.33692452677906	0.77117928953257	0.999999965386961
CCNL2	3604.90730959895	0.338923577896876	0.117873177613523	10.5793464139059	0.479146433872909	0.999999965386961
CCNT1	1485.87527886432	0.314841566338354	0.183808572713423	5.62256857155245	0.897324271630846	0.999999965386961
CCNT2	2547.12110459238	0.207492036031245	0.181321750017153	2.99276497746087	0.990821155025986	0.999999965386961
CCNY	2663.71326892286	0.435750379015128	0.125038038661699	9.45956789597835	0.579550812617819	0.999999965386961
[truncated: 20,405 more rows]
