# Supplementary material for: Time-course RNA-seq analysis reveals stage-specific and melatonin-triggered gene expression patterns during the hair follicle growth cycle in Capra hircus
Source: BMC Genomics. 2022 Feb 16;23:140. doi: 10.1186/s12864-022-08331-z (PMC8848980; doi:10.1186/s12864-022-08331-z)
Supplement: Supplementary file 5 — Additional file 5. Detailed genes of 3 clusters in the control group (DC1, DC2 and DC3). [file 12864_2022_8331_MOESM5_ESM.csv]

Gene	Group
AATK	DC1
ACTBL2	DC1
ADAM12	DC1
ADAMTSL2	DC1
ADRA1D	DC1
AIM1L	DC1
ALK	DC1
ALOX12	DC1
ANO3	DC1
APCDD1L	DC1
ARC	DC1
ARL15	DC1
ASB13	DC1
ASS1	DC1
ATP6V0A4	DC1
AURKA	DC1
BAMBI	DC1
BHLHE22	DC1
BMP2	DC1
BMP8A	DC1
BMP8B	DC1
BMPER	DC1
BNC2	DC1
C19H17orf67	DC1
C5H12orf56	DC1
CA10	DC1
CAPN12	DC1
CAPN8	DC1
CASQ2	DC1
CBX2	DC1
CCDC155	DC1
CCDC184	DC1
CCDC96	DC1
CDCA8	DC1
CDHR2	DC1
CDNF	DC1
CENPF	DC1
CENPL	DC1
CENPW	DC1
CEP55	DC1
CHST1	DC1
CITED4	DC1
CLSPN	DC1
CNIH3	DC1
CNTFR	DC1
COL2A1	DC1
CPM	DC1
CREG2	DC1
CRLF1	DC1
CRYAB	DC1
CSRNP3	DC1
CTGF	DC1
CTPS1	DC1
CUX1	DC1
DBF4B	DC1
DCLK3	DC1
DEPDC1	DC1
DIO3	DC1
DLX1	DC1
DLX2	DC1
DLX3	DC1
DLX4	DC1
DNASE1L2	DC1
DOK4	DC1
DSG4	DC1
DUSP14	DC1
DUSP2	DC1
EDA2R	DC1
EDN2	DC1
EDNRB	DC1
ELF3	DC1
ENTPD3	DC1
ERC1	DC1
ERCC6L	DC1
ESM1	DC1
EXO1	DC1
FABP7	DC1
FADS6	DC1
FAM132A	DC1
FAM167A	DC1
FAM222A	DC1
FAM49A	DC1
FAM83C	DC1
FAM83D	DC1
FGF2	DC1
FGF22	DC1
FHDC1	DC1
FHOD3	DC1
FMN1	DC1
FOXE1	DC1
FOXM1	DC1
FOXN1	DC1
FOXRED2	DC1
FXYD7	DC1
FZD10	DC1
FZD3	DC1
GABRP	DC1
GAS2L3	DC1
GATM	DC1
GDA	DC1
GGACT	DC1
GJA1	DC1
GJB2	DC1
GJB6	DC1
GLDN	DC1
GNG4	DC1
GOLGA7B	DC1
GPR155	DC1
GPRC5D	DC1
HCN2	DC1
HEPHL1	DC1
HMGA1	DC1
HOXC13	DC1
HS3ST6	DC1
HS6ST2	DC1
HSD17B14	DC1
KIAA1549	DC1
KIF1A	DC1
KRT26	DC1
KRT35	DC1
KRT36	DC1
KRT39	DC1
KRT6A	DC1
KRT74	DC1
KRT84	DC1
KRTAP11-1	DC1
KRTAP3-1	DC1
LCN2	DC1
LEF1	DC1
LNC.11044	DC1
LNC.11806	DC1
LNC.11934	DC1
LNC.11982	DC1
LNC.12350	DC1
LNC.13625	DC1
LNC.13827	DC1
LNC.14267	DC1
LNC.14892	DC1
LNC.14949	DC1
LNC.15799	DC1
LNC.16049	DC1
LNC.16940	DC1
LNC.16941	DC1
LNC.17081	DC1
LNC.17111	DC1
LNC.17126	DC1
LNC.17599	DC1
LNC.17600	DC1
LNC.17699	DC1
LNC.17906	DC1
LNC.17907	DC1
LNC.18803	DC1
LNC.18879	DC1
LNC.19406	DC1
LNC.19615	DC1
LNC.20614	DC1
LNC.2109	DC1
LNC.21573	DC1
LNC.21588	DC1
LNC.2186	DC1
LNC.21978	DC1
LNC.22352	DC1
LNC.24290	DC1
LNC.24437	DC1
LNC.249	DC1
LNC.2884	DC1
LNC.4267	DC1
LNC.4521	DC1
LNC.4802	DC1
LNC.515	DC1
LNC.553	DC1
LNC.5774	DC1
LNC.6206	DC1
LNC.6611	DC1
LNC.8064	DC1
LNC.8194	DC1
LNC.8242	DC1
LNC.8716	DC1
LNC.9379	DC1
LNC.9503	DC1
LNC.9684	DC1
LOC100861175	DC1
LOC100861381	DC1
LOC102168573	DC1
LOC102169338	DC1
LOC102170546	DC1
LOC102170758	DC1
LOC102171368	DC1
LOC102172084	DC1
LOC102172205	DC1
LOC102172755	DC1
LOC102172952	DC1
LOC102173506	DC1
LOC102173683	DC1
LOC102174202	DC1
LOC102174594	DC1
LOC102176457	DC1
LOC102176522	DC1
LOC102176726	DC1
LOC102176870	DC1
LOC102177231	DC1
LOC102177258	DC1
LOC102177517	DC1
LOC102177561	DC1
LOC102178311	DC1
LOC102178426	DC1
LOC102178483	DC1
LOC102178921	DC1
LOC102179595	DC1
LOC102179881	DC1
LOC102180330	DC1
LOC102180424	DC1
LOC102181374	DC1
LOC102181431	DC1
LOC102181719	DC1
LOC102181992	DC1
LOC102182181	DC1
LOC102182334	DC1
LOC102182550	DC1
LOC102182866	DC1
LOC102183211	DC1
LOC102183280	DC1
LOC102183595	DC1
LOC102183754	DC1
LOC102183766	DC1
LOC102184018	DC1
LOC102184223	DC1
LOC102184282	DC1
LOC102184572	DC1
LOC102184693	DC1
LOC102185150	DC1
LOC102185323	DC1
LOC102185436	DC1
LOC102187109	DC1
LOC102187452	DC1
LOC102188015	DC1
LOC102190423	DC1
LOC102191047	DC1
LOC102191796	DC1
LOC106502043	DC1
LOC106502157	DC1
LOC106502828	DC1
LOC106502987	DC1
LOC106503216	DC1
LOC106503231	DC1
LOC106503317	DC1
LOC106503586	DC1
LOC106503781	DC1
LOC108633785	DC1
LOC108633842	DC1
LOC108633853	DC1
LOC108633924	DC1
LOC108634035	DC1
LOC108634944	DC1
LOC108634945	DC1
LOC108635068	DC1
LOC108635069	DC1
LOC108635124	DC1
LOC108635369	DC1
LOC108635370	DC1
LOC108635497	DC1
LOC108636057	DC1
LOC108636234	DC1
LOC108636718	DC1
LOC108636734	DC1
LOC108637303	DC1
LOC108637384	DC1
LOC108637418	DC1
LOC108637426	DC1
LOC108637514	DC1
LOC108637881	DC1
LOC108638274	DC1
LOC108638285	DC1
LOC108638286	DC1
LOC108638289	DC1
LOC108638290	DC1
LOC108638292	DC1
LOC108638293	DC1
LOC108638294	DC1
LOC108638299	DC1
LOC108638300	DC1
LOC108638464	DC1
LPIN3	DC1
LSMEM1	DC1
LY6G6D	DC1
LZTS1	DC1
MAB21L3	DC1
MAT1A	DC1
MEST	DC1
MEX3A	DC1
MIR146B	DC1
MLXIPL	DC1
MPPED1	DC1
MSI1	DC1
MSX1	DC1
MSX2	DC1
MT4	DC1
MUC2	DC1
MYL6B	DC1
MYOM3	DC1
NCKAP5	DC1
NELL2	DC1
NEU2	DC1
NKPD1	DC1
NOTUM	DC1
NPHS1	DC1
NPTX2	DC1
NPW	DC1
NRARP	DC1
NRG2	DC1
NUP210	DC1
OCA2	DC1
OIP5	DC1
OTOP2	DC1
OTUB2	DC1
OVOL1	DC1
P4HA3	DC1
PADI1	DC1
PADI3	DC1
PARPBP	DC1
PCSK1N	DC1
PDZRN3	DC1
PGBD5	DC1
PIF1	DC1
PLA2G2F	DC1
POP1	DC1
PPP2R1B	DC1
PROSER2	DC1
PRR5L	DC1
PRSS12	DC1
PRSS22	DC1
PRSS23	DC1
PTCH2	DC1
PTGER2	DC1
RAB11FIP4	DC1
RBFOX3	DC1
REPIN1	DC1
RERG	DC1
RET	DC1
RIMS4	DC1
RNF19B	DC1
S100A1	DC1
SAMD11	DC1
SAMD5	DC1
SDR42E2	DC1
SERPINC1	DC1
SGO1	DC1
SHH	DC1
SHISA2	DC1
SLC13A2	DC1
SLC27A6	DC1
SLC30A1	DC1
SLC40A1	DC1
SLC5A8	DC1
SLC6A14	DC1
SLC7A11	DC1
SLC7A5	DC1
SLC7A8	DC1
SLC9A2	DC1
SLCO4A1	DC1
SLCO5A1	DC1
SMAD6	DC1
SP6	DC1
SPP1	DC1
SPTBN4	DC1
SRMS	DC1
SSTR2	DC1
STAR	DC1
STPG1	DC1
STUM	DC1
SYN1	DC1
TCHH	DC1
TCN1	DC1
TERT	DC1
TGM6	DC1
TGM7	DC1
TLL2	DC1
TMC7	DC1
TMEM88B	DC1
TMEM95	DC1
TNN	DC1
TNNT1	DC1
TRIM10	DC1
TRIM40	DC1
TRIOBP	DC1
TRPM6	DC1
TSPAN33	DC1
TUBB2A	DC1
UHRF1	DC1
VTCN1	DC1
WNT11	DC1
WNT2B	DC1
ZBTB8B	DC1
WNT2	DC1
ABCA6	DC2
ABCC9	DC2
ABCG2	DC2
ABCG8	DC2
ABI3	DC2
ACACB	DC2
ACADL	DC2
ACE2	DC2
ACHE	DC2
ACKR3	DC2
ACKR4	DC2
ACOX2	DC2
ACSM1	DC2
ACSS1	DC2
ADAM22	DC2
ADAM33	DC2
ADAM8	DC2
ADAMTS15	DC2
ADAMTSL1	DC2
ADAMTSL3	DC2
ADAMTSL4	DC2
ADCYAP1R1	DC2
ADGRA2	DC2
ADGRG5	DC2
ADIRF	DC2
ADORA3	DC2
ADRA1A	DC2
ADRB2	DC2
AHR	DC2
AHRR	DC2
AIF1	DC2
AKAP12	DC2
AKAP4	DC2
ALDH1L2	DC2
ALDH3B1	DC2
ALOX12B	DC2
ALOX5	DC2
ALOX5AP	DC2
ALPK1	DC2
ANGPTL2	DC2
ANK1	DC2
ANK2	DC2
ANKRD2	DC2
ANKRD37	DC2
ANKRD66	DC2
ANPEP	DC2
ANTXR2	DC2
ANXA6	DC2
AOAH	DC2
APBB1IP	DC2
APLNR	DC2
APOA1	DC2
AR	DC2
ARHGDIB	DC2
ARHGEF6	DC2
ARMC12	DC2
ARNTL2	DC2
ARRDC5	DC2
ASB2	DC2
ATOH8	DC2
ATP2B2	DC2
ATP8B4	DC2
ATRNL1	DC2
AUTS2	DC2
AVPR1A	DC2
B2M	DC2
B3GALT2	DC2
B3GNT9	DC2
BANK1	DC2
BCHE	DC2
BGLAP	DC2
BLK	DC2
BLNK	DC2
BTK	DC2
C16H1orf186	DC2
C1QTNF1	DC2
C1QTNF2	DC2
C1QTNF7	DC2
C25H16orf54	DC2
C28H10orf128	DC2
C29H11orf24	DC2
C3	DC2
C3H1orf68	DC2
C7	DC2
C7H5orf46	DC2
CA11	DC2
CACNA1D	DC2
CADM3	DC2
CADPS2	DC2
CALN1	DC2
CARD11	DC2
CARD14	DC2
CARD6	DC2
CARD9	DC2
CASC1	DC2
CATSPER2	DC2
CCBE1	DC2
CCDC114	DC2
CCDC146	DC2
CCDC36	DC2
CCDC88B	DC2
CCL21	DC2
CCL22	DC2
CCL26	DC2
CCL5	DC2
CCR4	DC2
CCR6	DC2
CCRL2	DC2
CCSER1	DC2
CD2	DC2
CD244	DC2
CD276	DC2
CD300LF	DC2
CD37	DC2
CD3D	DC2
CD3E	DC2
CD3G	DC2
CD40LG	DC2
CD48	DC2
CD5	DC2
CD53	DC2
CD6	DC2
CD7	DC2
CD74	DC2
CD84	DC2
CD86	DC2
CD8A	DC2
CDC42EP5	DC2
CDH4	DC2
CDR2L	DC2
CEBPE	DC2
CECR1	DC2
CELF2	DC2
CERCAM	DC2
CES3	DC2
CES4A	DC2
CFAP54	DC2
CFD	DC2
CFTR	DC2
CH25H	DC2
CHPT1	DC2
CHRM2	DC2
CILP	DC2
CLDND2	DC2
CLEC3B	DC2
CLMP	DC2
CNFN	DC2
CNGA3	DC2
CNN1	DC2
CNTN1	DC2
CNTNAP1	DC2
COCH	DC2
COL15A1	DC2
COL24A1	DC2
COL27A1	DC2
COL6A1	DC2
COL6A2	DC2
COL7A1	DC2
COL8A1	DC2
COLGALT2	DC2
COPZ2	DC2
CORO1A	DC2
CPA3	DC2
CPEB1	DC2
CPXM1	DC2
CRLF2	DC2
CROT	DC2
CSF2RA	DC2
CSF2RB	DC2
CTLA4	DC2
CTSO	DC2
CX3CR1	DC2
CXCR6	DC2
CYS1	DC2
DAB2	DC2
DACT3	DC2
DAGLA	DC2
DBP	DC2
DCN	DC2
DDIT4L	DC2
DENND2A	DC2
DGAT2L6	DC2
DHRS12	DC2
DHRS9	DC2
DIXDC1	DC2
DKK1	DC2
DLG2	DC2
DNAJB5	DC2
DNM1	DC2
DNM3	DC2
DOCK10	DC2
DOCK2	DC2
DOK2	DC2
DOK6	DC2
DPEP2	DC2
DPT	DC2
DTX1	DC2
DZIP1L	DC2
EBF3	DC2
EFEMP2	DC2
ELANE	DC2
ELL3	DC2
EMB	DC2
EMILIN1	DC2
EMILIN2	DC2
EMX2	DC2
ENTPD1	DC2
EPB41L3	DC2
ERICH4	DC2
ESR1	DC2
ETV1	DC2
EVI2A	DC2
EVI2B	DC2
EYA2	DC2
FAM105A	DC2
FAM114A1	DC2
FAM13A	DC2
FAM149A	DC2
FAM167B	DC2
FAM180B	DC2
FAM198B	DC2
FAM217A	DC2
FAM221A	DC2
FAM65C	DC2
FAM78B	DC2
FAM81A	DC2
FAT4	DC2
FBLN1	DC2
FBLN2	DC2
FBXL22	DC2
FCER1A	DC2
FCER1G	DC2
FCGBP	DC2
FCMR	DC2
FERMT3	DC2
FGL2	DC2
FGR	DC2
FLNC	DC2
FLT3	DC2
FLT4	DC2
FLYWCH2	DC2
FN1	DC2
FOLH1B	DC2
FOLR2	DC2
FOXO6	DC2
FUT11	DC2
FUT7	DC2
FUT8	DC2
FYB	DC2
GALNT12	DC2
GALNT16	DC2
GAPT	DC2
GATA2	DC2
GCSAML	DC2
GDPD2	DC2
GFI1	DC2
GGT1	DC2
GGT7	DC2
GIMAP1	DC2
GJA4	DC2
GJA9	DC2
GLB1	DC2
GLDC	DC2
GLIS3	DC2
GLT8D2	DC2
GMFG	DC2
GNA14	DC2
GNLY	DC2
GPM6A	DC2
GPM6B	DC2
GPR132	DC2
GPR141	DC2
GPR171	DC2
GPR176	DC2
GPR35	DC2
GPR39	DC2
GPR68	DC2
GRAP2	DC2
GRASP	DC2
GREM1	DC2
GSAP	DC2
GUCY1A3	DC2
HACD4	DC2
HAPLN1	DC2
HAVCR2	DC2
HCLS1	DC2
HCST	DC2
HDAC9	DC2
HDC	DC2
HESX1	DC2
HGF	DC2
HIF3A	DC2
HK3	DC2
HMCN2	DC2
HNMT	DC2
HOXA1	DC2
HOXA3	DC2
HOXB3	DC2
HOXD3	DC2
HRCT1	DC2
HRH2	DC2
HS3ST5	DC2
HSD11B1	DC2
HSD17B2	DC2
HTRA3	DC2
HVCN1	DC2
ICOSLG	DC2
IFFO1	DC2
IGFBP3	DC2
IGFBP6	DC2
IGSF6	DC2
IKZF1	DC2
IKZF2	DC2
IKZF3	DC2
IL10	DC2
IL11RA	DC2
IL15	DC2
IL16	DC2
IL18	DC2
IL1RL1	DC2
IL20RA	DC2
IL2RB	DC2
IL2RG	DC2
IL37	DC2
IL3RA	DC2
IL6R	DC2
IL7	DC2
IL7R	DC2
INPP4B	DC2
IRX3	DC2
ISLR	DC2
ITGA4	DC2
ITGA9	DC2
ITGAL	DC2
ITGAX	DC2
ITGB2	DC2
ITIH4	DC2
JAK3	DC2
KCNA3	DC2
KCNAB1	DC2
KCNAB2	DC2
KCNJ2	DC2
KCNJ8	DC2
KCNJ9	DC2
KCNN1	DC2
KCNQ4	DC2
KCNT1	DC2
KIAA1161	DC2
KIAA1324L	DC2
KLHL14	DC2
KLHL3	DC2
KLHL33	DC2
KLHL6	DC2
KRT1	DC2
KRT10	DC2
KRT77	DC2
LAMA4	DC2
LAMP3	DC2
LAPTM5	DC2
LAT	DC2
LAYN	DC2
LCP1	DC2
LCP2	DC2
LDHB	DC2
LEAP2	DC2
LETM2	DC2
LGI4	DC2
LGR6	DC2
LIMD2	DC2
LIX1L	DC2
LMX1B	DC2
LNC.11050	DC2
LNC.1124	DC2
LNC.11601	DC2
LNC.11657	DC2
LNC.11811	DC2
LNC.11950	DC2
LNC.12354	DC2
LNC.12372	DC2
LNC.12646	DC2
LNC.12739	DC2
LNC.13028	DC2
LNC.13411	DC2
LNC.13413	DC2
LNC.13707	DC2
LNC.14502	DC2
LNC.14789	DC2
LNC.15056	DC2
LNC.152	DC2
LNC.15620	DC2
LNC.1642	DC2
LNC.17071	DC2
LNC.17973	DC2
LNC.182	DC2
LNC.18411	DC2
LNC.18921	DC2
LNC.19475	DC2
LNC.19770	DC2
LNC.20164	DC2
LNC.20550	DC2
LNC.2147	DC2
LNC.2234	DC2
LNC.22636	DC2
LNC.23235	DC2
LNC.23971	DC2
LNC.2695	DC2
LNC.3200	DC2
LNC.3299	DC2
LNC.3408	DC2
LNC.3409	DC2
LNC.348	DC2
LNC.3668	DC2
LNC.4413	DC2
LNC.4444	DC2
LNC.498	DC2
LNC.6138	DC2
LNC.6264	DC2
LNC.6621	DC2
LNC.8500	DC2
LNC.8501	DC2
LNC.9408	DC2
LNC.9494	DC2
LNC.9515	DC2
LNC.9602	DC2
LOC102168203	DC2
LOC102168295	DC2
LOC102168343	DC2
LOC102168547	DC2
LOC102168581	DC2
LOC102168798	DC2
LOC102169221	DC2
LOC102169618	DC2
LOC102169994	DC2
LOC102170446	DC2
LOC102170693	DC2
LOC102171003	DC2
LOC102171053	DC2
LOC102171205	DC2
LOC102171346	DC2
LOC102171556	DC2
LOC102171786	DC2
LOC102171788	DC2
LOC102171899	DC2
LOC102171917	DC2
LOC102172190	DC2
LOC102172529	DC2
LOC102172711	DC2
LOC102172768	DC2
LOC102172792	DC2
LOC102172960	DC2
LOC102173047	DC2
LOC102173804	DC2
LOC102173955	DC2
LOC102173987	DC2
LOC102174023	DC2
LOC102174036	DC2
LOC102174197	DC2
LOC102174387	DC2
LOC102174471	DC2
LOC102174758	DC2
LOC102174834	DC2
LOC102175023	DC2
LOC102175610	DC2
LOC102175889	DC2
LOC102176126	DC2
LOC102176695	DC2
LOC102176740	DC2
LOC102177579	DC2
LOC102177855	DC2
LOC102178129	DC2
LOC102178567	DC2
LOC102178816	DC2
LOC102178953	DC2
LOC102179183	DC2
LOC102179243	DC2
LOC102179299	DC2
LOC102179411	DC2
LOC102179617	DC2
LOC102179763	DC2
LOC102179832	DC2
LOC102179937	DC2
LOC102179999	DC2
LOC102180231	DC2
LOC102180664	DC2
LOC102180889	DC2
LOC102181160	DC2
LOC102181422	DC2
LOC102181771	DC2
LOC102181811	DC2
LOC102183650	DC2
LOC102183692	DC2
LOC102183941	DC2
LOC102183956	DC2
LOC102183984	DC2
LOC102184041	DC2
LOC102184089	DC2
LOC102184116	DC2
LOC102184234	DC2
LOC102184304	DC2
LOC102184308	DC2
LOC102184360	DC2
LOC102184392	DC2
LOC102184551	DC2
LOC102184990	DC2
LOC102185228	DC2
LOC102185235	DC2
LOC102185237	DC2
LOC102185525	DC2
LOC102186727	DC2
LOC102187356	DC2
LOC102187597	DC2
LOC102187998	DC2
LOC102188010	DC2
LOC102188051	DC2
LOC102188072	DC2
LOC102188073	DC2
LOC102188267	DC2
LOC102188268	DC2
LOC102188567	DC2
LOC102188588	DC2
LOC102188744	DC2
LOC102188826	DC2
LOC102189356	DC2
LOC102189655	DC2
LOC102189713	DC2
LOC102189753	DC2
LOC102189932	DC2
LOC102190840	DC2
LOC102190926	DC2
LOC102190927	DC2
LOC102191204	DC2
LOC102191373	DC2
LOC102191549	DC2
LOC102191717	DC2
LOC106502311	DC2
LOC106502407	DC2
LOC106502433	DC2
LOC106502467	DC2
LOC106502531	DC2
LOC106502686	DC2
LOC106502890	DC2
LOC106502978	DC2
LOC106503257	DC2
LOC106503275	DC2
LOC106503481	DC2
LOC106503653	DC2
LOC106503673	DC2
LOC106503729	DC2
LOC106503915	DC2
LOC106503943	DC2
LOC106503979	DC2
LOC106504012	DC2
LOC108633258	DC2
LOC108633263	DC2
LOC108633275	DC2
LOC108633292	DC2
LOC108633798	DC2
LOC108634221	DC2
LOC108634243	DC2
LOC108634470	DC2
LOC108634598	DC2
LOC108634683	DC2
LOC108635249	DC2
LOC108635657	DC2
LOC108635658	DC2
LOC108635821	DC2
LOC108635825	DC2
LOC108636247	DC2
LOC108636338	DC2
LOC108636575	DC2
LOC108636854	DC2
LOC108636909	DC2
LOC108637283	DC2
LOC108637380	DC2
LOC108637647	DC2
LOC108637682	DC2
LOC108637846	DC2
LOC108637990	DC2
LOC108638007	DC2
LOC108638019	DC2
LOC108638221	DC2
LOC108638461	DC2
LOC108638594	DC2
LOR	DC2
LPAR1	DC2
LPL	DC2
LPXN	DC2
LRRC31	DC2
LSMEM2	DC2
LST1	DC2
LTB	DC2
LTC4S	DC2
LUM	DC2
LVRN	DC2
LYL1	DC2
MAN1A1	DC2
MANEAL	DC2
MAP3K7CL	DC2
1-Mar	DC2
MASP1	DC2
MATK	DC2
MCOLN2	DC2
MCTP1	DC2
MDGA1	DC2
MEF2B	DC2
MEIS2	DC2
MEIS3	DC2
MELTF	DC2
METTL24	DC2
MFAP2	DC2
MFNG	DC2
MGP	DC2
MIR214	DC2
MMP25	DC2
MMRN1	DC2
MN1	DC2
MPZ	DC2
MSC	DC2
MTMR7	DC2
MUSK	DC2
MYL3	DC2
MYO15B	DC2
MYO1F	DC2
MYO1G	DC2
MYOC	DC2
MYRIP	DC2
NAIP	DC2
NAV3	DC2
NCALD	DC2
NCF1	DC2
NCF4	DC2
NCKAP1L	DC2
NDNF	DC2
NFATC4	DC2
NFKBIZ	DC2
NGFR	DC2
NKG7	DC2
NLRC3	DC2
NR1D1	DC2
NR2F1	DC2
NRG4	DC2
NRXN1	DC2
NUDT7	DC2
OAF	DC2
OLFML1	DC2
OLFML3	DC2
OPRL1	DC2
OSCAR	DC2
OSMR	DC2
P3H1	DC2
P3H4	DC2
PABPC4L	DC2
PADI2	DC2
PALD1	DC2
PAM	DC2
PAQR7	DC2
PARVG	DC2
PCDH18	DC2
PCOLCE2	DC2
PCP4	DC2
PDE1A	DC2
PDE1B	DC2
PDE3B	DC2
PDE4C	DC2
PDE7B	DC2
PDE8A	DC2
PDYN	DC2
PECR	DC2
PER3	DC2
PFKFB4	DC2
PGM5	DC2
PHF7	DC2
PHKG1	DC2
PIK3AP1	DC2
PIK3CD	DC2
PIK3R5	DC2
PIK3R6	DC2
PIR	DC2
PLA2G7	DC2
PLCB2	DC2
PLCD4	DC2
PLCE1	DC2
PLCXD3	DC2
PLD1	DC2
PLD4	DC2
PLEK	DC2
PLEKHD1	DC2
PLIN2	DC2
PLP1	DC2
PLS1	DC2
PLXNA4	DC2
PM20D2	DC2
PMAIP1	DC2
PNMAL2	DC2
PNPLA5	DC2
PODN	DC2
POSTN	DC2
POU2F3	DC2
PPFIA4	DC2
PPP1R1A	DC2
PRAM1	DC2
PRDM16	DC2
PRKCB	DC2
PROC	DC2
PROS1	DC2
PROX1	DC2
PRR16	DC2
PRRG3	DC2
PRRX1	DC2
PRRX2	DC2
PRUNE2	DC2
PTGES	DC2
PTGFR	DC2
PTGIR	DC2
PTGS1	DC2
PTH1R	DC2
PTP4A3	DC2
PTPN22	DC2
PTPN7	DC2
PTPRC	DC2
PTPRCAP	DC2
PVRIG	DC2
PYGM	DC2
RAB26	DC2
RAB44	DC2
RAC2	DC2
RAMP3	DC2
RASA3	DC2
RASAL3	DC2
RASGRP2	DC2
RASGRP4	DC2
RBM20	DC2
RCSD1	DC2
RELN	DC2
REPS2	DC2
RFTN2	DC2
RGS1	DC2
RGS11	DC2
RGS14	DC2
RGS22	DC2
RGS4	DC2
RGS5	DC2
RGS7	DC2
RHOH	DC2
RILP	DC2
RIMS3	DC2
RINL	DC2
RNF150	DC2
ROBO2	DC2
RORC	DC2
RPS6KL1	DC2
RRAD	DC2
RRAGD	DC2
RTN4RL1	DC2
S100A4	DC2
S1PR4	DC2
SACS	DC2
SAMD15	DC2
SAMSN1	DC2
SASH3	DC2
SBSPON	DC2
SCARF1	DC2
SCD5	DC2
SCIMP	DC2
SCIN	DC2
SCN7A	DC2
SCN9A	DC2
SCNN1B	DC2
SCNN1G	DC2
SCTR	DC2
SCUBE2	DC2
SELP	DC2
SELPLG	DC2
SEMA3B	DC2
SEMA6D	DC2
1-Sep	DC2
6-Sep	DC2
SERPINA12	DC2
SERPINH1	DC2
SERTM1	DC2
SFMBT2	DC2
SGCD	DC2
SH2D1A	DC2
SH2D2A	DC2
SH3BGR	DC2
SIDT1	DC2
SIGLEC10	DC2
SIGLEC11	DC2
SIGLEC5	DC2
SIT1	DC2
SLA	DC2
SLA2	DC2
SLAMF6	DC2
SLC10A1	DC2
SLC16A2	DC2
SLC1A1	DC2
SLC22A16	DC2
SLC25A29	DC2
SLC26A10	DC2
SLC2A12	DC2
SLC2A4	DC2
SLC2A6	DC2
SLC35F1	DC2
SLC38A4	DC2
SLC4A11	DC2
SLC6A20	DC2
SLURP1	DC2
SMPD5	DC2
SNCA	DC2
SNCG	DC2
SNED1	DC2
SNTA1	DC2
SOX6	DC2
SPATA20	DC2
SPEF2	DC2
SPINK4	DC2
SPN	DC2
SPOCK1	DC2
SPON2	DC2
SPRN	DC2
SRGAP3	DC2
SRGN	DC2
SRL	DC2
SRPX2	DC2
ST6GALNAC2	DC2
ST8SIA6	DC2
STAC2	DC2
STAT4	DC2
STC1	DC2
STK32A	DC2
STMN2	DC2
SULF1	DC2
SULT4A1	DC2
SYCE1L	DC2
SYN2	DC2
TBC1D8B	DC2
TBX5	DC2
TCAP	DC2
TCTN1	DC2
TENM1	DC2
TENM3	DC2
TESPA1	DC2
TEX12	DC2
TGFBR3	DC2
TGM2	DC2
THBS4	DC2
THEM4	DC2
THEM5	DC2
TIE1	DC2
TIGD7	DC2
TLL1	DC2
TLR1	DC2
TM4SF5	DC2
TMED8	DC2
TMEM119	DC2
TMEM150C	DC2
TMEM173	DC2
TMEM200B	DC2
TMEM252	DC2
TMEM255A	DC2
TMEM255B	DC2
TMEM35A	DC2
TMEM35B	DC2
TMEM52	DC2
TMEM71	DC2
TMOD2	DC2
TMPRSS4	DC2
TMTC2	DC2
TNF	DC2
TNFAIP8L2	DC2
TNFRSF18	DC2
TNFRSF4	DC2
TNFSF14	DC2
TNXB	DC2
TOX	DC2
TPM2	DC2
TPPP	DC2
TPPP2	DC2
TRAF3IP3	DC2
TRAM2	DC2
TREM1	DC2
TREML2	DC2
TRPC6	DC2
TSHZ2	DC2
TSKS	DC2
TSPAN11	DC2
TSPAN32	DC2
TSPAN4	DC2
TSPYL5	DC2
TWIST1	DC2
TWIST2	DC2
TYROBP	DC2
UBASH3A	DC2
UCN2	DC2
UCP2	DC2
ULBP3	DC2
UNC5C	DC2
VAMP1	DC2
VAV1	DC2
VCAN	DC2
VIPR2	DC2
VOPP1	DC2
VSTM2L	DC2
WAS	DC2
WFDC5	DC2
WIPF3	DC2
WISP2	DC2
WNT16	DC2
WNT4	DC2
WNT5B	DC2
WSCD1	DC2
YJEFN3	DC2
ZC2HC1A	DC2
ZC3H12D	DC2
ZC3H6	DC2
ZDHHC2	DC2
ZEB2	DC2
ZFPM2	DC2
ZNF521	DC2
ABCC11	DC3
ABCC4	DC3
ACADSB	DC3
ACCSL	DC3
ACKR1	DC3
ACSM5	DC3
ACTG2	DC3
ADAMTS2	DC3
ADAMTS4	DC3
ADAMTS9	DC3
ADD2	DC3
ADRA2A	DC3
AEBP1	DC3
AFF2	DC3
ALDH1A1	DC3
ALPK3	DC3
ANGPT1	DC3
ANGPT4	DC3
ANGPTL1	DC3
ANGPTL5	DC3
ANO1	DC3
APLN	DC3
AQP3	DC3
AQP5	DC3
ARFGEF3	DC3
ASPN	DC3
ATP12A	DC3
ATP13A5	DC3
AZGP1	DC3
BHLHA15	DC3
C11H2orf40	DC3
C15H11orf52	DC3
C1H21orf62	DC3
C1QTNF3	DC3
C1QTNF6	DC3
C2	DC3
C25H16orf45	DC3
C25H16orf89	DC3
C28H10orf99	DC3
C2CD4B	DC3
C8H9orf84	DC3
CA4	DC3
CACNA1G	DC3
CAMK2A	DC3
CAPN14	DC3
CCDC160	DC3
CCDC80	DC3
CCL20	DC3
CCR5	DC3
CD248	DC3
CD80	DC3
CDO1	DC3
CELF6	DC3
CERS6	DC3
CFB	DC3
CGREF1	DC3
CHAD	DC3
CHI3L2	DC3
CHODL	DC3
CLDN7	DC3
CLEC11A	DC3
CLGN	DC3
COL13A1	DC3
COL1A1	DC3
COL1A2	DC3
COL21A1	DC3
COL26A1	DC3
COL3A1	DC3
COL5A1	DC3
COL5A2	DC3
COL6A3	DC3
COL6A5	DC3
CORIN	DC3
CP	DC3
CPNE6	DC3
CPZ	DC3
CREB3L1	DC3
CREB3L4	DC3
CRIP3	DC3
CRTAM	DC3
CSN2	DC3
CTHRC1	DC3
CXCL11	DC3
CXCL9	DC3
CYSLTR1	DC3
CYTH4	DC3
DACT2	DC3
DIO1	DC3
DNAJC12	DC3
ECM2	DC3
EFEMP1	DC3
EGFL6	DC3
ELN	DC3
EMILIN3	DC3
EPDR1	DC3
EPHB2	DC3
FAIM2	DC3
FAM184A	DC3
FAM198A	DC3
FAM3B	DC3
FAM69A	DC3
FAM83A	DC3
FBN1	DC3
FBN2	DC3
FBP2	DC3
FKBP10	DC3
FKBP7	DC3
FSTL1	DC3
GABBR2	DC3
GABRR2	DC3
GDF11	DC3
GDF9	DC3
GIPC2	DC3
GJB1	DC3
GKN1	DC3
GLYATL2	DC3
GPA33	DC3
GPRC5A	DC3
GPX7	DC3
GPX8	DC3
GRIK5	DC3
GRM7	DC3
HEPACAM	DC3
HHIPL1	DC3
HHIPL2	DC3
HIVEP3	DC3
HOXA2	DC3
HPN	DC3
HRASLS	DC3
HSD11B2	DC3
HTR2A	DC3
ICOS	DC3
IGDCC4	DC3
IGF1	DC3
IGFBP5	DC3
IGSF10	DC3
IL17C	DC3
IL17F	DC3
IL31RA	DC3
IRF8	DC3
ITGBL1	DC3
JCHAIN	DC3
KAZALD1	DC3
KCNA6	DC3
KCNIP3	DC3
KCNK12	DC3
KCNMA1	DC3
KDELR3	DC3
KERA	DC3
KITLG	DC3
KLHDC7A	DC3
KLHL13	DC3
KLK12	DC3
KLK13	DC3
KLK5	DC3
KLK8	DC3
KLK9	DC3
KRT12	DC3
KRT18	DC3
KRT24	DC3
KRT4	DC3
LBP	DC3
LECT1	DC3
LNC.1040	DC3
LNC.13362	DC3
LNC.14450	DC3
LNC.14610	DC3
LNC.15245	DC3
LNC.15484	DC3
LNC.15488	DC3
LNC.16000	DC3
LNC.16415	DC3
LNC.17187	DC3
LNC.17485	DC3
LNC.17610	DC3
LNC.18924	DC3
LNC.1907	DC3
LNC.20598	DC3
LNC.21205	DC3
LNC.21690	DC3
LNC.23203	DC3
LNC.23204	DC3
LNC.23766	DC3
LNC.24147	DC3
LNC.2427	DC3
LNC.3640	DC3
LNC.3679	DC3
LNC.502	DC3
LNC.5259	DC3
LOC100860781	DC3
LOC102168381	DC3
LOC102168428	DC3
LOC102168852	DC3
LOC102168946	DC3
LOC102169125	DC3
LOC102169217	DC3
LOC102169411	DC3
LOC102169462	DC3
LOC102169695	DC3
LOC102169730	DC3
LOC102170823	DC3
LOC102171351	DC3
LOC102172230	DC3
LOC102172606	DC3
LOC102173760	DC3
LOC102174322	DC3
LOC102174398	DC3
LOC102174470	DC3
LOC102174841	DC3
LOC102174895	DC3
LOC102174897	DC3
LOC102175177	DC3
LOC102180084	DC3
LOC102181154	DC3
LOC102181690	DC3
LOC102181880	DC3
LOC102182197	DC3
LOC102182683	DC3
LOC102182869	DC3
LOC102183178	DC3
LOC102183401	DC3
LOC102183851	DC3
LOC102184497	DC3
LOC102184758	DC3
LOC102185430	DC3
LOC102186025	DC3
LOC102186944	DC3
LOC102187204	DC3
LOC102187755	DC3
LOC102187872	DC3
LOC102187932	DC3
LOC102188029	DC3
LOC102188300	DC3
LOC102188576	DC3
LOC102189116	DC3
LOC102191166	DC3
LOC102191280	DC3
LOC102191453	DC3
LOC102191729	DC3
LOC106502522	DC3
LOC106502796	DC3
LOC106503120	DC3
LOC106503341	DC3
LOC106503369	DC3
LOC106503418	DC3
LOC106503608	DC3
LOC106503671	DC3
LOC106503681	DC3
LOC106503980	DC3
LOC108633164	DC3
LOC108633210	DC3
LOC108633262	DC3
LOC108633346	DC3
LOC108633801	DC3
LOC108633912	DC3
LOC108634034	DC3
LOC108634312	DC3
LOC108634355	DC3
LOC108634363	DC3
LOC108634591	DC3
LOC108634790	DC3
LOC108634884	DC3
LOC108635555	DC3
LOC108635869	DC3
LOC108636648	DC3
LOC108636846	DC3
LOC108637134	DC3
LOC108637166	DC3
LOC108638061	DC3
LOC108638062	DC3
LOC108638502	DC3
LOX	DC3
LOXL4	DC3
LRG1	DC3
LRMP	DC3
LRRC17	DC3
LRRC2	DC3
LRRC73	DC3
LRRC75A	DC3
LSAMP	DC3
LTF	DC3
LY6D	DC3
LY6E	DC3
LYPD2	DC3
LYVE1	DC3
MAMDC2	DC3
MAP28	DC3
MATN4	DC3
MC4R	DC3
MC5R	DC3
MFAP5	DC3
MIR147	DC3
MIR199A	DC3
MLANA	DC3
MMP23B	DC3
MMP27	DC3
MMP7	DC3
MRO	DC3
MTUS2	DC3
MUC20	DC3
MYOM1	DC3
NNAT	DC3
NPHS2	DC3
NREP	DC3
NRK	DC3
NSUN7	DC3
NTNG2	DC3
OGN	DC3
OLFML2B	DC3
OSR1	DC3
OSR2	DC3
PAEP	DC3
PAX9	DC3
PCDH12	DC3
PCOLCE	DC3
PDE6A	DC3
PDGFRL	DC3
PDLIM3	DC3
PGLYRP1	DC3
PI3	DC3
PIGR	DC3
PLAC9	DC3
PLIN3	DC3
PPIC	DC3
PRF1	DC3
PRIMA1	DC3
PRKCQ	DC3
PRRT4	DC3
QPCT	DC3
RBP2	DC3
RCAN2	DC3
RCN1	DC3
RCN3	DC3
RECK	DC3
RP1L1	DC3
RPTN	DC3
RUBCNL	DC3
RUNX3	DC3
S100A7A	DC3
S100A8	DC3
S100A9	DC3
SEC14L3	DC3
SEC16B	DC3
SELE	DC3
SERPINF1	DC3
SERPINF2	DC3
SERPING1	DC3
SLC16A10	DC3
SLC17A9	DC3
SLC1A2	DC3
SLC25A35	DC3
SLC26A9	DC3
SLC28A1	DC3
SLC28A3	DC3
SLC45A2	DC3
SLC5A1	DC3
SLC6A2	DC3
SLC6A9	DC3
SLC7A4	DC3
SOX18	DC3
SP5	DC3
SPARC	DC3
SPDEF	DC3
SPINK7	DC3
SPINK9	DC3
SPON1	DC3
SSC5D	DC3
ST6GALNAC1	DC3
ST8SIA1	DC3
STEAP4	DC3
STRC	DC3
SUSD2	DC3
SV2C	DC3
SVEP1	DC3
TBC1D10C	DC3
TC2N	DC3
TDRD6	DC3
TFPI	DC3
TGFBI	DC3
THBS3	DC3
TLR3	DC3
TLR6	DC3
TMEM114	DC3
TMEM132C	DC3
TMEM229A	DC3
TMEM266	DC3
TMEM45B	DC3
TMEM8A	DC3
TMPRSS2	DC3
TNFSF13	DC3
TRPM1	DC3
TRPV6	DC3
TSPEAR	DC3
TTC6	DC3
TTLL10	DC3
TYR	DC3
UPP1	DC3
VIL1	DC3
WISP1	DC3
ZC3H12A	DC3
ZNF181	DC3
BCL2A1	DC3
CD40	DC3
COL6A6	DC3
