# Supplementary material for: Time-course RNA-seq analysis reveals stage-specific and melatonin-triggered gene expression patterns during the hair follicle growth cycle in Capra hircus
Source: BMC Genomics. 2022 Feb 16;23:140. doi: 10.1186/s12864-022-08331-z (PMC8848980; doi:10.1186/s12864-022-08331-z)
Supplement: Supplementary file 7 — Additional file 7. The Pearson correlations between genes and lncRNAs. [file 12864_2022_8331_MOESM7_ESM.csv]

LncRNA	Gene	Correlation
LNC.11806	FZD3	0.829773656
LNC.18803	FZD3	0.805360057
LNC.18879	FZD3	0.819629445
LNC.22534	FZD3	0.825857389
LNC.4267	FZD3	0.852797138
LNC.9684	FZD3	0.856108936
LOC102168837	FZD3	0.836032314
LOC106502043	FZD3	0.834521048
LOC108636057	FZD3	0.837966736
LOC108636718	FZD3	0.848038221
LOC108638464	FZD3	0.815122479
LNC.13827	BMP2	0.819708955
LNC.11044	WNT11	0.838858344
LNC.15799	WNT11	0.826686846
LNC.16941	WNT11	0.847102246
LNC.2109	WNT11	0.836426575
LNC.21573	WNT11	0.802199105
LNC.2186	WNT11	0.8140672
LNC.24437	WNT11	0.868964141
LNC.6206	WNT11	0.869931161
LNC.8064	WNT11	0.914869335
LOC102169338	WNT11	0.894193545
LNC.11806	PPP2R1B	0.868533531
LNC.16941	PPP2R1B	0.821428533
LNC.20565	PPP2R1B	0.804062892
LNC.21573	PPP2R1B	0.814767914
LNC.2186	PPP2R1B	0.931505986
LNC.24437	PPP2R1B	0.875301824
LNC.5774	PPP2R1B	0.85117315
LNC.8064	PPP2R1B	0.841674874
LNC.9684	PPP2R1B	0.8177469
LOC102168837	PPP2R1B	0.806080505
LOC106502043	PPP2R1B	0.80406171
LOC108636718	PPP2R1B	0.841296598
LOC108636734	PPP2R1B	0.80771035
LOC108637384	PPP2R1B	0.839307181
LOC108637426	PPP2R1B	0.837250771
LNC.11044	LEF1	0.819264207
LNC.11934	LEF1	0.821859843
LNC.16941	LEF1	0.895923024
LNC.20943	LEF1	0.837346475
LNC.2109	LEF1	0.897530431
LNC.21573	LEF1	0.813424199
LNC.6206	LEF1	0.896302924
LNC.8064	LEF1	0.888576637
LNC.9684	LEF1	0.823501003
LOC108636718	LEF1	0.826616125
LNC.11144	BMP8A	0.821849566
LNC.11806	BMP8A	0.86378198
LNC.11982	BMP8A	0.815681075
LNC.13827	BMP8A	0.882493203
LNC.15799	BMP8A	0.843034454
LNC.16941	BMP8A	0.943499265
LNC.17126	BMP8A	0.868850265
LNC.20943	BMP8A	0.839196909
LNC.2109	BMP8A	0.88928911
LNC.21573	BMP8A	0.82667607
LNC.2186	BMP8A	0.850626208
LNC.22534	BMP8A	0.867953867
LNC.24437	BMP8A	0.802680111
LNC.6206	BMP8A	0.841885102
LNC.6973	BMP8A	0.900474099
LNC.8064	BMP8A	0.907674046
LNC.9684	BMP8A	0.834411148
LOC102168837	BMP8A	0.82887719
LOC102169338	BMP8A	0.876011519
LOC102180279	BMP8A	0.80538548
LOC106502157	BMP8A	0.831109347
LOC106502828	BMP8A	0.833737331
LOC108636734	BMP8A	0.832718344
LOC108638274	BMP8A	0.869796713
LOC108638464	BMP8A	0.812319109
LNC.11044	FZD10	0.835579762
LNC.2109	FZD10	0.81333332
LNC.24437	FZD10	0.804050574
LNC.6206	FZD10	0.805315034
LNC.13171	WNT2	0.806040264
LNC.15017	WNT2	0.844305134
LNC.20921	WNT2	0.893450535
LOC102174629	WNT2	0.837437918
LNC.11044	BAMBI	0.836180946
LNC.11806	BAMBI	0.817978993
LNC.16941	BAMBI	0.894365123
LNC.2109	BAMBI	0.901398106
LNC.21573	BAMBI	0.850706723
LNC.2186	BAMBI	0.889709698
LNC.24437	BAMBI	0.833931835
LNC.6206	BAMBI	0.908866052
LNC.8064	BAMBI	0.909910912
LOC102169338	BAMBI	0.841962894
LOC108636734	BAMBI	0.800857186
LOC108638274	BAMBI	0.806513693
LNC.11044	SMAD6	0.827239786
LNC.15799	SMAD6	0.835348661
LNC.16941	SMAD6	0.830684017
LNC.6206	SMAD6	0.827811084
LNC.8064	SMAD6	0.902293668
LOC102169338	SMAD6	0.875652267
LNC.3408	IL10	0.802076968
LNC.3688	PIK3CD	0.879014458
LNC.11657	CD3G	0.832703388
LNC.14789	CD3G	0.847149106
LNC.348	CD3G	0.825011854
LNC.3688	CD3G	0.832563799
LNC.6138	CD3G	0.844114393
LNC.9802	CD3G	0.826700312
IL2RB	CD3E	0.806128976
LNC.18074	CD3E	0.802270988
LNC.3688	CD3E	0.849526089
LNC.9802	CD3E	0.88602867
LOC108637283	CD3E	0.892400519
IL2RB	CD3D	0.845368531
LNC.14789	CD3D	0.867503913
LNC.3688	CD3D	0.892902597
LNC.9802	CD3D	0.908119006
LOC108637283	CD3D	0.882027841
LNC.14789	VAV1	0.821567651
LNC.3688	VAV1	0.880554529
LNC.9802	VAV1	0.81748692
LOC108637283	VAV1	0.874884806
LOC106503915	PIK3R5	0.817052413
LNC.14789	PTPRC	0.815921004
LNC.3688	PTPRC	0.839066912
LNC.9802	PTPRC	0.849963293
LOC106503915	PTPRC	0.812335639
LOC108637283	PTPRC	0.805102663
IL2RB	LOC102176695	0.842216559
LNC.14789	LOC102176695	0.820333765
LNC.3688	LOC102176695	0.914035818
LNC.9802	LOC102176695	0.867416198
LOC108637283	LOC102176695	0.896158102
LNC.14789	LCP2	0.822402235
LNC.18074	LCP2	0.83105318
LNC.3688	LCP2	0.857074734
LNC.9802	LCP2	0.87625594
LOC106503915	LCP2	0.800205563
LOC108637283	LCP2	0.845597442
LNC.3688	LAT	0.886006147
LNC.9802	LAT	0.845660397
LOC108637283	LAT	0.860162877
LNC.18411	CARD11	0.85776332
LOC102179617	CARD11	0.81543719
LOC106502531	CARD11	0.826512946
LOC106503653	CARD11	0.812151364
LOC106503369	CARD11	0.823804156
LNC.3408	WAS	0.847492625
LNC.3688	WAS	0.871463101
LNC.9802	WAS	0.812191781
LOC108637283	WAS	0.856945574
LNC.3688	CXCR6	0.824180403
LNC.9802	CXCR6	0.805244661
LNC.502	RASGRP2	0.812484052
LOC106503915	FGR	0.818784856
LNC.9802	CCL5	0.810275301
LNC.3688	RAC2	0.828520137
LNC.9802	RAC2	0.844775135
LOC106503915	RAC2	0.807547241
LOC108637283	RAC2	0.882005685
LOC106503915	CCR6	0.843239783
LOC108637682	CCR6	0.816735071
LNC.3408	PLCB2	0.804146243
LOC108637846	PLCB2	0.813051803
LNC.14789	IL15	0.811424801
LNC.6138	IL15	0.830499455
LNC.18074	CSF2RB	0.8555876
LNC.3688	CSF2RB	0.842181819
LNC.9802	CSF2RB	0.809249006
LOC108637283	CSF2RB	0.802921186
LOC108637526	CSF2RB	0.847339771
LOC106503915	IL2RG	0.850871539
LNC.11050	CSF2RA	0.808601489
LOC102179617	CSF2RA	0.834346048
LOC106502978	CSF2RA	0.811881754
LOC106503915	CSF2RA	0.814753404
LOC106503418	CSF2RA	0.868796803
LNC.11657	IL7	0.81168722
LNC.6138	IL7	0.856172199
LOC102179832	IL7	0.800176548
LNC.3688	STAT4	0.812070372
LNC.6350	STAT4	0.82485733
LNC.11657	IL7R	0.826275282
LNC.14789	IL7R	0.828073304
LNC.17071	IL7R	0.800851014
LNC.22888	IL7R	0.80728435
LNC.3200	IL7R	0.816796825
LNC.6138	IL7R	0.801589458
LNC.9408	IL7R	0.843997556
LNC.9212	IL7R	0.810624817
LNC.14789	IL6R	0.864827468
LNC.18074	IL6R	0.829856318
LNC.348	IL6R	0.83530808
LOC102179832	IL6R	0.832961541
LNC.17610	IL6R	0.805530764
LNC.3409	CRLF2	0.806695224
LOC102171346	CRLF2	0.831134422
LOC102179617	CRLF2	0.841018005
LOC106502978	CRLF2	0.801491477
LOC106503653	CRLF2	0.847209717
LNC.11657	CARD6	0.859594891
LNC.9408	NAIP	0.801428071
LNC.13411	LOC102191717	0.84020768
LOC102169221	LOC102191717	0.823314322
LOC106503608	LOC102191717	0.81335181
LNC.3688	RGS14	0.888924129
LNC.9802	RGS14	0.807957407
LOC108637283	RGS14	0.838724813
LNC.11657	PRKCB	0.833193577
LNC.348	PRKCB	0.833584105
LOC102188010	PRKCB	0.807706237
LNC.2725	HGF	0.816740807
LNC.348	HGF	0.824804211
LNC.6138	HGF	0.805352473
LOC102179832	HGF	0.815550376
LNC.1040	HGF	0.831487656
LNC.17610	FLT4	0.833192654
LNC.11657	LPAR1	0.853113942
LNC.2725	LPAR1	0.812421613
LNC.348	LPAR1	0.81048793
LOC102188010	LPAR1	0.809340965
IL2RB	ITGAL	0.829212787
LNC.3688	ITGAL	0.818935873
LNC.9802	ITGAL	0.834436423
LOC108637283	ITGAL	0.83780871
LOC108637526	ITGAL	0.816550771
LNC.3408	FYB	0.819027046
LNC.3688	FYB	0.82732706
LOC108637846	FYB	0.803078592
LOC106503418	FYB	0.851572041
LNC.11657	APBB1IP	0.827268166
LNC.14789	CHRM2	0.805319463
LOC102188010	LAMA4	0.836713209
LNC.348	RELN	0.804679437
LNC.12956	THEM4	0.807527049
LNC.21205	THEM4	0.820733061
LNC.11050	COL27A1	0.835281503
LOC102171346	COL27A1	0.817878221
LOC106502978	COL27A1	0.867032074
LOC108634221	COL27A1	0.80810894
LOC106502102	COL27A1	0.857033936
LOC106503369	COL27A1	0.838162414
LOC102179617	COL24A1	0.801477615
LOC106502102	COL24A1	0.829146412
LOC106503369	COL24A1	0.814944838
LOC106503418	COL24A1	0.800187251
LNC.15054	COL6A1	0.844146431
LNC.11657	PIK3AP1	0.830174265
LNC.17610	ITGA9	0.814648036
LNC.3688	PDE1B	0.814112607
LOC106503608	PDE1B	0.832014657
LOC108637526	PDE1B	0.817217441
LNC.18411	ATP2B2	0.80921707
LNC.20197	ATP2B2	0.870473161
LNC.3668	ATP2B2	0.843769355
LOC102191373	ATP2B2	0.813184309
LNC.12956	ATP2B2	0.808888089
LNC.15245	ATP2B2	0.845059916
LNC.15484	ATP2B2	0.820799087
LNC.17485	ATP2B2	0.895013531
LNC.2427	ATP2B2	0.806854077
LNC.3640	ATP2B2	0.909583225
LNC.502	ATP2B2	0.804357309
LOC102184758	ATP2B2	0.877387673
LOC102188029	ATP2B2	0.86027563
LOC102191729	ATP2B2	0.862450838
LOC106503369	ATP2B2	0.807912946
LOC108634790	ATP2B2	0.817098552
LOC108636846	ATP2B2	0.827388831
LOC108638511	ATP2B2	0.812904332
LNC.348	ADRA1A	0.822856822
LOC102168798	ADRA1A	0.804373892
LOC108634221	ADRA1A	0.814559144
LNC.17610	ADRA1A	0.821517762
LNC.502	ADRA1A	0.819128816
LNC.3688	PHKG1	0.879844247
LNC.9802	PHKG1	0.812483353
LOC108637283	PHKG1	0.859494692
LNC.9802	HRH2	0.817311279
LOC108637283	HRH2	0.830178848
LNC.20197	PLCD4	0.804796365
LNC.3640	PLCD4	0.818533043
LNC.15056	BLNK	0.859909922
LNC.17789	BLNK	0.860512586
LNC.2417	BLNK	0.839423996
LNC.3200	BLNK	0.832636233
LNC.3408	BLNK	0.83432129
LNC.4042	BLNK	0.880100006
LNC.6621	BLNK	0.8053447
LOC108635658	BLNK	0.842694218
LNC.6138	ADCYAP1R1	0.827819517
LOC102173804	ADCYAP1R1	0.818730986
LNC.18924	ADCYAP1R1	0.810259267
LNC.6621	VIPR2	0.808562988
LOC106502531	VIPR2	0.80170258
LOC106502978	PDE4C	0.808145455
LNC.18411	CNGA3	0.809143821
LNC.6621	CNGA3	0.858754326
LNC.14789	CFTR	0.804655992
LNC.2417	CFTR	0.836170392
IL2RB	ANGPT4	0.839554
LNC.19770	ANGPT4	0.811400451
LNC.6138	ANGPT4	0.820777809
LNC.18924	ANGPT4	0.887616275
LNC.1040	ANGPT1	0.833428698
LNC.15054	LOC102187872	0.814860406
LNC.16438	LOC102187872	0.81315217
LOC108634034	LOC102187872	0.841685362
LOC108638502	LOC102187872	0.818294749
LNC.20197	IGF1	0.857874225
LNC.17485	THBS3	0.801671135
LOC102168946	THBS3	0.848817819
LOC102191729	THBS3	0.816828754
LOC108634034	THBS3	0.837964226
LOC108638502	THBS3	0.849075314
LNC.16000	COL3A1	0.818123715
LOC102168946	COL3A1	0.80176848
LNC.20197	CREB3L4	0.806524527
LNC.12956	CREB3L4	0.92069816
LNC.15245	CREB3L4	0.900263011
LNC.15484	CREB3L4	0.852162835
LNC.17485	CREB3L4	0.861947594
LNC.18924	CREB3L4	0.868566961
LNC.21205	CREB3L4	0.84970215
LNC.2426	CREB3L4	0.825005183
LNC.2427	CREB3L4	0.823498829
LNC.3640	CREB3L4	0.836230307
LOC102184758	CREB3L4	0.817497966
LOC102188029	CREB3L4	0.903432299
LOC102191729	CREB3L4	0.855347192
LOC106503671	CREB3L4	0.813961381
LOC108634034	CREB3L4	0.871876168
LNC.12956	CREB3L1	0.841746938
LOC108634034	CHAD	0.896769862
LNC.8035	CCL20	0.826917049
LNC.15245	LBP	0.820170575
LNC.23192	LBP	0.866352807
LNC.2428	LBP	0.817560486
LNC.24570	LBP	0.810244942
LOC108633346	LBP	0.92090405
LOC108636385	CXCL9	0.808264074
