# Supplementary material for: Time-course RNA-seq analysis reveals stage-specific and melatonin-triggered gene expression patterns during the hair follicle growth cycle in Capra hircus
Source: BMC Genomics. 2022 Feb 16;23:140. doi: 10.1186/s12864-022-08331-z (PMC8848980; doi:10.1186/s12864-022-08331-z)
Supplement: Supplementary file 8 — Additional file 8. Genes with different expression patterns between the control and melatonin-treated groups. [file 12864_2022_8331_MOESM8_ESM.csv]

	baseMean	log2FoldChange	lfcSE	stat	pvalue	padj
A1BG	65.9859967941213	0.0117581374483655	0.498687250884219	5.57679957063431	0.900058455150657	0.999999999607242
A2ML1	12.8567765888428	0.433089874971354	1.02551461000699	28.2190537073065	0.00299632099177857	NA
A3GALT2	46.1546431988791	0.189887502163602	0.544018706734797	19.1055085775336	0.0592256916867004	0.362642611695757
A4GALT	82.4357496107903	0.104376318397407	0.523802369603133	9.58244604114179	0.568290456522732	0.999999999607242
AAAS	568.894363603245	0.028122336463912	0.243764556363081	25.218824417578	0.00846732657430764	0.104989983241774
AACS	1587.5126056848	-0.0335560831312352	0.180464212200225	53.8581606046113	1.25280796660281e-07	6.35984279516601e-05
AADACL3	429.381418459973	0.0924710605577626	0.938996797131104	7.72890391102897	0.737362727533181	0.999999999607242
AADAT	481.570418457645	-0.198259416417515	0.353313595967675	6.85698509163706	0.810544025959368	0.999999999607242
AAED1	546.061104052382	0.206591211622378	0.328468652667842	19.1569167255705	0.0583343090224466	0.359800168126635
AAGAB	1060.84085901168	-0.0453149098995158	0.140496974103513	6.59613471555588	0.83078340025873	0.999999999607242
AAK1	560.392950161931	-0.125547591713731	0.518025227721992	8.81993786088708	0.638508661153854	0.999999999607242
AAMDC	564.013880887695	0.113319458090218	0.31709847742223	8.85872636977808	0.634930740309363	0.999999999607242
AAMP	1992.48840326058	0.138793087905238	0.171443977484021	12.0299817772719	0.361393809776449	0.944098252874452
AANAT	1.99472394596977	-0.972446066729943	2.23917684404256	12.7872477271	0.307457994322148	NA
AAR2	534.166950037361	0.00644236969780312	0.179636662601373	20.9802046372471	0.033576721527158	0.259415493983325
AARD	33.6912866647656	0.530974060179104	0.838135493359575	40.5157495448855	2.91898891814885e-05	0.00258367942191021
AARS	2780.12544510626	-0.0486680066750212	0.171988958627086	13.6907963394988	0.250577561271362	0.806613091650555
AARS2	263.715232544784	0.171369168255584	0.258142865960159	8.08264061730063	0.705882422495129	0.999999999607242
AASDH	577.769948631337	0.031888293444466	0.232716157621354	14.0432342913584	0.230610373942523	0.772929325005387
AASDHPPT	2000.084514922	0.0319715996444368	0.245166832661621	2.39481621172808	0.996557608154009	0.999999999607242
AASS	1728.52030756696	0.255630523904776	0.241918012775289	10.110676286411	0.520460112522549	0.999999999607242
AATF	582.363990357749	0.0220942337673794	0.237117300956844	5.07254790641127	0.927602262824056	0.999999999607242
AATK	547.368887809637	-0.072995845129998	0.403328623805023	27.7752272393593	0.00350400199962794	0.0599396179520101
ABAT	68.4084913690897	-0.312646817673542	0.510822201808703	7.37988844788549	0.767538051009263	0.999999999607242
ABCA1	3732.8448461684	-0.137910666767002	0.359468959196844	13.0424950191812	0.290557034523719	0.86567253762332
ABCA10	1852.49312008714	0.362748968294664	0.345602413283581	14.3290779239651	0.215316068503097	0.749240626051453
ABCA12	2497.19861974561	-0.115979767127764	0.291698469257549	11.499603000666	0.402405352481296	0.989187416499384
ABCA13	8.49386101717041	-0.909197280911677	1.64755850224346	6.57534833368612	0.832357028264088	NA
ABCA2	545.836839627142	-0.101093896350002	0.394362795496612	4.31394807654715	0.959817538268181	0.999999999607242
ABCA3	236.732030884761	0.020915756051185	0.329897935836802	6.99219486683478	0.79971522413037	0.999999999607242
ABCA5	2075.79332702625	0.0956591334673287	0.296132663589987	21.1124212661016	0.0322248657876987	0.252159192653288
ABCA6	1281.39823680563	0.163547634715622	0.513470712924146	12.6645593757817	0.315813713484261	0.892573226582339
ABCA7	139.326563017126	-0.774977979138155	0.394281633364889	15.876074658983	0.145794279193221	0.613608695165813
ABCB1	228.027695739343	-0.26103737160942	0.429240060622433	14.0821531060577	0.228480904961804	0.770230550711081
ABCB10	958.787554161662	-0.023093613077086	0.221786572124551	5.81920665224084	0.885150712568865	0.999999999607242
ABCB6	855.42862159837	-0.0874254012653796	0.185456706709203	7.77933554476294	0.732923691162159	0.999999999607242
ABCB7	834.375272246124	-0.124034351540358	0.184408743603063	20.0910615057645	0.0441073705012697	0.305665538555747
ABCB8	997.678992094081	0.00303335461160692	0.284960143174215	16.243170072697	0.132340672031516	0.582178586054348
ABCB9	338.44150947617	-0.109033735914226	0.244237132180263	19.57062514883	0.051588679542372	0.334870480970794
ABCC1	1116.98835973852	-0.0247032898270446	0.220255507620089	9.95682205858179	0.534275189660289	0.999999999607242
ABCC10	398.072250384503	0.29553567544264	0.358888995993293	7.65346403136516	0.743968478168437	0.999999999607242
ABCC11	2705.52619163221	0.217086610232348	0.875779453227098	8.47303984117912	0.670406977285378	0.999999999607242
ABCC3	1079.74509199683	-0.0631899229113641	0.169820612285191	22.4747871151783	0.0209424852702347	0.191963513417022
ABCC4	1091.04667940733	0.0344469353089262	0.356097999703323	36.0228630272843	0.000167760726990572	0.00846020285916196
ABCC5	1146.4584100401	0.0416937700502129	0.224737803685204	12.8874505282101	0.300745230631629	0.876983051309667
ABCC8	73.5533771210239	0.236674614629861	0.496791901022232	30.6494139893468	0.00125188680433058	0.030476115998231
ABCC9	373.380414793394	0.190884362278252	0.455850641428355	20.254114628	0.0419750896913922	0.29558957489736
ABCD1	399.85621253093	-0.0573194301581086	0.29325023639486	7.56184149038813	0.751932222535183	0.999999999607242
ABCD3	2368.6080381481	-0.0407161361634017	0.263968474234547	3.58086259271386	0.980616358188854	0.999999999607242
ABCD4	573.416650818498	-0.131396521469589	0.219323377898659	4.92902645080505	0.934554957392526	0.999999999607242
ABCE1	3015.15703176967	-0.121655268297332	0.285286049665369	10.2909946954176	0.504417596487711	0.999999999607242
ABCF2	879.809764641337	-0.0335122977114787	0.190929796299307	19.5954436173195	0.0512073398851492	0.333455221624804
ABCF3	1426.76662696193	-0.0432933552935434	0.142768657596625	11.0989410216222	0.435011943627803	0.999999999607242
ABCG1	924.040534041773	0.0974652990677736	0.443887499735176	12.0503218548258	0.359872600955999	0.941407222853253
ABCG2	339.559528702697	-0.438450649999265	0.347768069257713	33.9876268626724	0.000363379781432688	0.0142012249525287
ABCG5	4.86787106749788	1.03019841541848	1.80091240319879	9.40644338552045	0.584429971016331	NA
ABCG8	24.4980863678995	0.695552501808965	0.860277224674229	9.74468772745138	0.553488470605815	0.999999999607242
ABHD1	139.362444383831	0.347501320229815	0.397990739109606	8.04433466945989	0.709326966912735	0.999999999607242
ABHD11	512.623512017897	-0.179005767689736	0.294928916662765	5.08734864755252	0.926862603606828	0.999999999607242
ABHD12	2243.99128626459	-0.137873221578688	0.246835273209968	5.94774393591661	0.876828060135129	0.999999999607242
ABHD12B	291.028900071625	-0.037668212680423	0.389177120958177	9.99639518181516	0.530711437083379	0.999999999607242
ABHD13	1651.85817618413	0.0555107199804349	0.22891663179386	6.36774967990777	0.847735275910468	0.999999999607242
ABHD14A	159.001117583363	-0.462708701519167	0.37024651009654	10.2326036839024	0.509593739590236	0.999999999607242
ABHD14B	1818.65785408722	0.00615582397346391	0.178990029590887	10.8710467591694	0.454129058283557	0.999999999607242
ABHD15	67.7443414733802	0.0252831652920279	0.64810659456667	12.9873145257246	0.294155335596496	0.869825553507221
ABHD16A	1107.62619735662	-0.0722650883860348	0.162199491409318	7.61572239607494	0.747257016387655	0.999999999607242
ABHD17A	1164.26011351597	-0.0172276624572461	0.249458114472747	5.10851754412147	0.925797362915665	0.999999999607242
ABHD17B	1016.64972430039	-0.0144355453105949	0.309301100787158	7.73531868415478	0.736799097265008	0.999999999607242
ABHD17C	710.729871442271	-0.341206728733467	0.216732307837603	12.9185546218217	0.298681975882213	0.875331893449309
ABHD18	411.595722115236	-0.189140120728855	0.380981965361226	5.51060012217761	0.903945578153348	0.999999999607242
ABHD2	837.109797031717	-0.0212760502826162	0.36516543365105	5.37578141786878	0.911611788031402	0.999999999607242
ABHD3	471.14987045871	-0.380546673334404	0.295739435694645	7.47873575612243	0.759096062535533	0.999999999607242
ABHD4	796.113428504131	0.0718486075599725	0.246973986921901	6.49070945580161	0.838701938962021	0.999999999607242
ABHD5	4252.35519064923	-0.00530582879762794	0.270893898849482	11.6870134827091	0.387623218632083	0.974279416570518
ABHD6	306.33413071223	-0.153301615064368	0.249428688941331	5.2305581333286	0.919488428406622	0.999999999607242
ABHD8	305.098833642632	0.259243231214696	0.309857373121228	7.41722208792862	0.76435999093464	0.999999999607242
ABI1	3000.55750012242	-0.00535946811393048	0.178438644648524	10.386841696348	0.495962455193848	0.999999999607242
ABI2	64.0656147645544	0.423462052755804	0.643686718943529	5.52845076012989	0.902905323116674	0.999999999607242
ABI3	86.2431387157395	-0.277064143394134	0.617587458751638	6.95549822848261	0.802675805509875	0.999999999607242
ABI3BP	3080.18469428306	-0.104464763976808	0.289845818700012	32.1544026615873	0.000720404332409698	0.0216623323647934
ABL1	2186.45988313943	0.0754851698063011	0.250956644046624	4.20421974281078	0.963557654043913	0.999999999607242
ABL2	388.478152635655	0.0531278751798391	0.646728515064057	4.59511872730116	0.949180601728644	0.999999999607242
ABLIM1	7356.64941361049	-0.206636770639425	0.165042499537144	19.1693824187516	0.0581199850261435	0.359423483178516
ABLIM2	341.090349556949	0.126840110013153	0.347599139094153	15.0408593583632	0.180634001258158	0.685972026780156
ABLIM3	347.635311485591	0.23740209104146	0.252053997839425	18.0452144240051	0.0805373912674516	0.435078364092712
ABR	3069.38636882157	0.0915542029860138	0.172684872154481	6.62032752004018	0.828944373365444	0.999999999607242
ABRACL	1021.32164424636	-0.0365513400819369	0.304380729306406	13.8869486269499	0.239312334657777	0.788514051205561
ABT1	1083.49566505793	0.00156729458451831	0.195409261539628	8.54444132374647	0.663861760111272	0.999999999607242
ABTB1	1635.65691485708	0.00337190783472502	0.261443719149616	8.81466899891439	0.638994567953355	0.999999999607242
ABTB2	970.743751357012	-0.135387492924982	0.250066953483049	16.0002091116409	0.14112311724892	0.602046032344307
ACAA1	2012.20567591717	0.151406506103887	0.237432016503812	13.8743123500542	0.240026499011065	0.789416420146909
ACAA2	2444.90171760791	-0.0814993790043361	0.323167831193389	3.39738731301532	0.98436419779392	0.999999999607242
ACACA	2398.94910219211	0.161949148913329	0.311888117591521	4.77834262705937	0.941424046036866	0.999999999607242
ACACB	128.793473923859	-0.00301745966198223	0.54743794900587	9.51068777735384	0.574861698860289	0.999999999607242
ACAD11	526.304778179381	-0.00213773615616365	0.291981447232638	7.33754562895922	0.771126775313851	0.999999999607242
ACAD8	1070.67917569408	-0.0559073612710752	0.224973799353692	7.2614166907216	0.777535511074083	0.999999999607242
ACAD9	3070.59643188153	0.122268161501524	0.203566624460048	16.7840594019979	0.114427315056199	0.533787961586487
ACADL	429.273108502904	-0.534754154753168	0.495461084032788	18.2031911109736	0.0769840398124872	0.423167046867366
ACADS	491.61012325143	-0.218131590125984	0.34823867311532	3.56134328198596	0.981041075336702	0.999999999607242
ACADSB	785.816935844068	0.377009750378098	0.567008527974575	11.3990819224401	0.410460074196491	0.997963217443505
ACADVL	3036.11753156384	-0.0414098815838129	0.169387248960736	9.72052835785087	0.555687271655937	0.999999999607242
ACAP1	1145.48574783879	-0.116512597735835	0.607834578816814	3.49903498763751	0.9823549712719	0.999999999607242
ACAP2	1198.10519967345	-0.00963477231498814	0.413705291141318	9.94552396006122	0.53529389362839	0.999999999607242
ACAP3	1192.06125649658	-0.0822421329724003	0.270163428418873	20.6744617464051	0.0369049029225639	0.274250354623792
ACAT1	3704.34402169736	-0.0424106022054319	0.310592819142151	11.3428544659955	0.41500303988767	0.999999999607242
ACAT2	1006.76477319282	-0.102771618398527	0.252743700814292	10.8500876851867	0.455906699788371	0.999999999607242
ACBD3	1946.64675003865	0.00981199972455176	0.117551647489141	10.265283580118	0.506694498654987	0.999999999607242
ACBD4	476.080058939909	-0.00690885340102237	0.267286295214014	7.61456482170604	0.747357702871259	0.999999999607242
ACBD5	1356.16672771258	-0.034858238507189	0.220280053144013	7.20769791381531	0.782022865028171	0.999999999607242
ACBD6	357.28781869557	-0.00785499521168	0.211932938617279	22.009579300644	0.0242991365609056	0.210640313745963
ACCS	292.366033855971	0.0552693142826082	0.42037911837944	7.65224003962601	0.744075301461415	0.999999999607242
ACCSL	6.31854210622302	-0.578456617650697	1.57098164751381	9.73331071957637	0.554523669710404	NA
ACD	453.243505709439	-0.0463613499683998	0.240726763405893	9.68929891450205	0.558532446748739	0.999999999607242
ACE2	281.775174084254	-0.0709387545152995	0.546656547641742	14.7497737295234	0.194241392915123	0.710749722644693
ACER1	1452.38638065289	0.263490074531981	0.314733805298272	17.3242951087748	0.0986422951229342	0.490370395686015
ACER2	261.50068296065	0.256558818232265	0.396173763589161	8.48947318638147	0.668901780174313	0.999999999607242
ACER3	948.6877193795	-0.0667952945179978	0.348855121909692	11.6129163028586	0.393430608310949	0.980188087635508
ACHE	285.854854385413	0.110397411270656	0.441915539412906	28.4486017921419	0.00276231947613961	0.0513214576514206
ACIN1	6269.79465465201	0.111663587158733	0.243968434395638	4.6577472216045	0.946602843134222	0.999999999607242
ACKR1	96.3044002591866	0.0857897315913169	0.813149389225016	4.12926044742142	0.965982026483219	0.999999999607242
ACKR3	968.660375561539	-0.0184650139164951	0.356971585850476	59.1495760135845	1.33340955623816e-08	1.43841555879192e-05
ACKR4	352.816132727299	0.775578123063956	0.66663003611007	40.1526163744253	3.36873841132631e-05	0.00280890941929914
ACLY	4209.25246289197	0.0140109155949256	0.119427714907947	5.35264465115461	0.912893332083291	0.999999999607242
ACMSD	5.54151826601151	-0.783554959863733	1.42122529857163	8.55638228722552	0.66276588571408	NA
ACO1	1367.94369519918	-0.107013219306389	0.230958737389277	11.3629478260522	0.41337651639676	0.999999999607242
ACO2	2266.33358148002	-0.0380885812566544	0.143715016807157	21.5397872632416	0.0281910258856425	0.232141756694549
ACOT11	35.5662659119784	0.747232464080154	0.814729811312586	3.54593261716445	0.981371952850726	0.999999999607242
ACOT12	26.4627175847775	0.413556542776021	1.12819817632834	1.40762925651723	0.999721321397423	0.999999999607242
ACOT6	196.702964498183	-0.135017847002393	0.309641093228306	8.00673930735923	0.71270000368347	0.999999999607242
ACOT7	1084.40184467726	-0.0354287917133284	0.250484900444784	15.9326535878608	0.143649565697975	0.607693996065452
ACOT8	426.7861963523	0.083917286522157	0.275638353851124	10.3458632154712	0.499570941032402	0.999999999607242
ACOT9	841.475191353881	0.12735232685977	0.22711251059552	12.6552600119504	0.316453160787026	0.893012737151264
ACOX1	3092.50886931084	-0.0657427426093472	0.160504121937923	6.22397515036096	0.858009626382594	0.999999999607242
ACOX2	332.860358847098	-0.269220454480204	0.386992118208841	27.9699980456317	0.00327177353884724	0.0572536334855485
ACOX3	1408.13568396879	0.023157199437153	0.186048807303055	4.93329734135546	0.934353825856969	0.999999999607242
ACOXL	8.36303475885203	-1.80623364949155	1.14264795392989	15.2431901746758	0.17163208216059	NA
ACP1	1501.46204831787	-0.00294431544037595	0.190296482722301	17.1675782580054	0.103015457504285	0.502557036892018
ACP2	428.611051781576	0.23152775262516	0.4677088047008	4.44942681379655	0.954882633990425	0.999999999607242
ACP5	1027.38719227921	-0.0708088142652074	0.369413287944923	4.0482380599052	0.968484622199552	0.999999999607242
ACP6	537.499169785218	-0.0438735305038622	0.281459739587724	16.5031181001229	0.12345648781131	0.558603947018082
ACP7	1702.61462187252	-0.172204030700201	0.363135921902308	33.289231236362	0.000472271869075926	0.0164531265018671
ACPP	1071.03714247647	-0.0141213191193988	0.308347835496968	5.68978524523823	0.893240314845409	0.999999999607242
ACRBP	15.1791798397646	-0.946820636149765	0.936561403924103	12.4538620851064	0.330511875246327	0.911533647756173
ACRC	552.840084880108	-0.202211195377552	0.282380409489802	15.5627312630862	0.158156167766313	0.639891105402382
ACSBG1	6648.04428154832	0.14202701802607	0.411225126929238	8.53644069666257	0.66459581806842	0.999999999607242
ACSBG2	45.277900920963	0.0166778701565642	0.648294445053049	9.23963459555603	0.599783486471427	0.999999999607242
ACSF2	1684.29212992521	0.0431623370694757	0.182395307182027	33.7760695907791	0.000393476163050832	0.0147960753251794
ACSF3	345.467495488291	-0.0396642937594503	0.460963629120429	4.97425501993962	0.932406996125187	0.999999999607242
ACSL1	6043.95337320031	0.0312574173422421	0.222740153723697	18.3022147695235	0.0748279121069208	0.415550116784251
ACSL3	3425.77684899499	-0.149868484531261	0.201736181543143	16.7882281517191	0.11429768714951	0.533376853403192
ACSL4	1634.34234564776	-0.0518358439089812	0.297603264139843	13.6981851535056	0.250146252186158	0.806613091650555
ACSL5	2710.05224320963	-0.0378597144540756	0.376684417183008	4.70644140039917	0.944545851784033	0.999999999607242
ACSM1	97.960886200484	-0.132631910077198	0.615481573398267	22.5699562846698	0.0203114109246415	0.188076691287185
ACSM3	814.051953362831	0.10905239418335	0.639785405731473	7.38030745936953	0.767502453808985	0.999999999607242
ACSM5	147.222861633184	0.782049230449241	0.62414577793534	14.935929455502	0.185448942628844	0.694704940107178
ACSS1	1186.02895676707	0.167042262692979	0.3007227854538	9.34728539135574	0.589869829594174	0.999999999607242
ACSS2	1621.55464077205	0.165563087650568	0.322058883687095	2.39330502360133	0.996567403985821	0.999999999607242
ACSS3	1541.89859542219	0.173042971930186	0.273001059840401	3.48720142434763	0.982597371611863	0.999999999607242
ACTA1	16.2680872831245	0.229291736353895	1.52591174650992	10.2346382486816	0.509413072440775	0.999999999607242
ACTA2	7410.81038343053	-0.0836873026078074	0.35127061687428	9.16760956671919	0.606424434464561	0.999999999607242
ACTB	44534.1469055632	-0.223449835939027	0.155159069084292	13.3974662515802	0.268142633461929	0.83329885731957
ACTBL2	2836.07733618728	0.21532282219492	0.571560171900684	18.6543646844175	0.0675870179854133	0.391679689805274
ACTC1	13.0627525807193	1.23312179396052	2.01454376984655	20.9127579441964	0.034286256815552	NA
ACTG1	57550.1308146958	-0.162690916483067	0.185473147965715	7.21506057990678	0.781409576704347	0.999999999607242
ACTG2	2508.31101059881	-0.480930250249839	0.550250940471122	20.8901515601174	0.0345271425584553	0.264139018863007
ACTL10	2.57013491266515	0.163423517776867	1.85351339486797	8.80930027777231	0.639489656310909	NA
ACTL6A	627.170306646083	0.0568541589554327	0.211808529078031	19.524851589445	0.0522987347735296	0.33757522894208
ACTL7A	0.192519372656709	-0.984715521632055	14.3166800231646	0.411894361692603	0.999999509184884	NA
ACTL7B	0.0268449596669556	-0.0252645512387692	14.3166800277794	0.0530704008764147	0.999999999992721	NA
ACTN1	6267.79359616532	-0.21756554232366	0.165638231446331	10.2007318278409	0.512426797079656	0.999999999607242
ACTN3	43.7036446865104	-0.456139196881411	0.870611248079784	3.87497949232693	0.973432358998966	0.999999999607242
ACTN4	10690.0595034533	0.118147714592998	0.256095473947116	15.915511235803	0.144296593792187	0.609385664020832
ACTR10	1625.88316923766	-0.0536141806361248	0.243837126156941	5.63157000338572	0.896782074282107	0.999999999607242
ACTR1A	4452.28023883673	-0.0489669674038523	0.137736547442961	15.024175217359	0.18139285007551	0.687190648003358
ACTR1B	979.516975431887	-0.0061548703649375	0.173748248159952	10.7719114130347	0.462565060666071	0.999999999607242
ACTR2	6458.55259213955	-0.153890396249743	0.144763668960468	8.31415706815437	0.684916281673617	0.999999999607242
ACTR3	3614.62315296852	-0.199143989600789	0.215871099930611	6.69574523911115	0.823160378568787	0.999999999607242
ACTR3B	272.083899734722	-0.270279163629307	0.255107658751316	15.496168105735	0.16088979544424	0.644754555228135
ACTR5	447.615129440244	0.158852738329733	0.185255527951037	6.45530489513988	0.841325659918777	0.999999999607242
ACTR6	751.323487107465	0.239614313769504	0.350580147958463	4.48433597503742	0.953553810488563	0.999999999607242
ACTR8	582.433908307598	-0.0977850274822162	0.151524853263097	8.48188372321988	0.669597024025426	0.999999999607242
ACTRT3	22.4665908700374	0.539946192371486	0.750822133832243	2.64761575185037	0.994611740870484	0.999999999607242
ACVR1	1546.06092479635	0.0100304608119647	0.203891696658245	19.5190145490393	0.0523899127139755	0.337911021466075
ACVR1B	2609.231037783	0.0341354925298625	0.216455863952529	14.8152326479545	0.191112904247116	0.705826046673503
ACVR2A	1376.21081799421	0.056746790915073	0.24422126428309	5.7525694861356	0.88935280565488	0.999999999607242
ACVR2B	873.455698045306	0.0632564216979866	0.350621546373168	2.75077386706175	0.993626468419613	0.999999999607242
ACVRL1	881.13444541957	0.12715092573092	0.335358002528073	13.5701339499901	0.257698406458449	0.819431557751075
ACY1	353.421821369248	-0.171046364289677	0.339661492483009	12.7738795532601	0.308361147103401	0.885428946765048
ACYP1	256.144744082842	0.222875636618708	0.282786103226036	15.093177284003	0.178270851387969	0.682095992228336
ACYP2	215.981583325812	-0.166878532115834	0.423966074927345	5.8697771946363	0.881910165890077	0.999999999607242
ADA	219.946486613026	0.113694815123677	0.396657194330691	6.29276101758967	0.85313367525418	0.999999999607242
ADAL	539.178977791936	-0.0775473167757661	0.325968520856746	3.09694110038515	0.989381673852952	0.999999999607242
ADAM10	2830.21224079341	-0.0778309604733748	0.18525404764604	7.14693755661153	0.787062381279135	0.999999999607242
ADAM11	66.9638885360498	0.33044128714338	0.443813088690443	12.7479168011423	0.310120288204526	0.887237498278367
ADAM12	513.97244795742	-0.639290454584786	0.497775812630169	17.8588450018179	0.0849142295694397	0.449640815324636
ADAM15	1262.63830881095	-0.0217640732666137	0.229062618355088	18.3320566993997	0.0741886933081867	0.413489663620668
ADAM17	2039.8417021865	-0.166363838692663	0.147663131202611	11.9262129817564	0.369215064182792	0.953418911998054
ADAM19	430.840775461602	-0.206033005085037	0.489675158125106	9.02559563127613	0.619529636693023	0.999999999607242
ADAM22	63.9463572064429	-0.15832121808878	0.854130331022263	20.701187874723	0.0366023315346469	0.273364271240522
ADAM33	3084.38947756013	0.0192184828053014	0.279844854018486	51.3128002022488	3.63011509589341e-07	0.00013331018415983
ADAM8	151.138934764555	0.176477072855426	0.719804110612183	18.097975750429	0.0793348953200805	0.431146188043007
ADAM9	1111.47696268616	0.036132310192557	0.274747847431464	13.2334537277259	0.27834129267302	0.847284433336397
ADAMDEC1	60.8199274448573	-2.07438455591763	1.220661341281	15.3879630295136	0.16541567971381	0.655434947626344
ADAMTS1	2378.77301619676	-0.0746376857392036	0.271340489975068	4.70244276112544	0.944716507341227	0.999999999607242
ADAMTS10	468.68830374357	-0.0591939616422231	0.353212168683442	9.81060214038291	0.547499935098596	0.999999999607242
ADAMTS12	300.701506012657	0.143311522924269	0.594619165751232	5.54400204019259	0.901994298343913	0.999999999607242
ADAMTS13	37.3563762872404	0.812222529082607	0.811837732726563	10.7110533469814	0.467778207532527	0.999999999607242
ADAMTS15	359.379049952699	-0.303160388230665	0.401340420006756	13.8833397598414	0.239516135122965	0.788940551950836
ADAMTS17	439.57571362487	-0.121284603222154	0.476936357055549	25.316196682858	0.00819273263394803	0.103016345567339
ADAMTS18	285.079616548875	0.336528176110704	0.497628313902659	17.3463877283559	0.098038902372998	0.48891980784685
ADAMTS19	29.9898133733448	0.340840571060431	0.558615420116452	26.7615954607539	0.00499178144901357	0.0756436767427342
ADAMTS2	1107.96665373115	-0.794083322151807	0.751824964166716	19.865465266244	0.0472201924527432	0.31895329518303
ADAMTS20	39.7138900105329	0.98191864008277	0.75212830428455	13.4839039784287	0.262876758324869	0.827679383568513
ADAMTS4	72.841377500683	-0.0737731314633985	1.09667458515105	6.88370892437956	0.808421254636656	0.999999999607242
ADAMTS5	902.453805765238	0.0673402707069563	0.502796148571467	7.50662410044799	0.756698596057697	0.999999999607242
ADAMTS6	121.968934618941	-0.0661560996516489	0.448807830712571	14.1797096846362	0.223208455879049	0.760808806577347
ADAMTS7	332.007933754833	-0.210270748152085	0.418914185911209	13.2846365185918	0.275129538608276	0.843761580993894
ADAMTS9	646.022257064532	-0.381718806995167	0.412613709428045	27.5128286601052	0.00384203229632573	0.0631556927948401
ADAMTSL1	185.166807551385	0.707107368567093	0.438641711160562	31.0561951052117	0.0010791340885139	0.0276347987652077
ADAMTSL2	400.99901347854	0.31201694287519	0.519821435284453	42.8111447527507	1.17144076079159e-05	0.00152023064144834
ADAMTSL3	558.255886207026	0.0319397926590512	0.302962500795346	38.2553746594178	7.08388629734614e-05	0.00464896872593895
ADAMTSL4	1489.84155905712	-0.0329111404860311	0.378921247210203	27.8569883718545	0.00340464903061375	0.0586734555410305
ADAMTSL5	281.747914428936	-0.199249849350556	0.403547740870527	2.69539177068395	0.994170158730836	0.999999999607242
ADAP1	370.966489775108	0.0586326024201473	0.280409602043029	8.23604775565957	0.692015958325335	0.999999999607242
ADAP2	184.808839558162	-0.171133451227486	0.443518771407784	13.7415161758615	0.247627868500174	0.803092260487224
ADAR	1957.16733636148	-0.126052371448627	0.296319646531359	19.5752229330136	0.0515178407566863	0.334650392968255
ADARB1	1592.53196627984	0.0829805651765743	0.21364271420956	2.55611280861865	0.995389481614567	0.999999999607242
ADAT1	438.054986193296	0.0176825535111849	0.301982835279626	6.3052032838151	0.852243884962719	0.999999999607242
ADAT2	113.91774376928	-0.00752525943715106	0.325080611741904	5.47111236717194	0.906225896166777	0.999999999607242
ADAT3	19.3261611679843	0.197964873565517	0.743646470992101	3.54538201072569	0.981383702509559	0.999999999607242
ADCK1	111.541497020493	0.24329428889389	0.353937906780985	16.0650594699787	0.138732705841	0.59639098224949
ADCK2	421.602378973421	-0.0980508529029468	0.225569847404357	14.3283541240775	0.215353789951323	0.749240626051453
ADCK5	1290.35704774189	0.0372855994863559	0.301177697859099	7.06661018196121	0.793663892970995	0.999999999607242
ADCY1	84.302818867985	0.238173716607511	0.777774094982063	4.03612819030661	0.968848236545268	0.999999999607242
ADCY2	364.199035087011	-0.0810863559452753	0.293455610907787	15.4768166071269	0.161691718545492	0.646959938167343
ADCY3	417.607411211015	0.222699732220375	0.365739533429597	3.94751595753951	0.971427198070344	0.999999999607242
ADCY4	327.576043197931	0.345556225764052	0.344280695299703	15.4198487732605	0.164071372761003	0.652655426101618
ADCY6	1032.47801361054	0.206725291127887	0.251589833756833	5.84496244345735	0.883505816233761	0.999999999607242
ADCY7	1926.39908450877	-0.101233786151466	0.261043206397783	6.69076448976989	0.8235447217808	0.999999999607242
ADCY9	424.876164482084	0.234626890890021	0.277812268924205	20.644444288284	0.0372474693194942	0.275682384414438
ADCYAP1R1	164.421519413912	0.198935664945538	0.560293797790448	27.5341158057302	0.00381348171150409	0.0630466420886596
ADD1	3683.68295397084	0.0798757024102212	0.243049734720076	8.00382817823106	0.712960865025027	0.999999999607242
ADD2	97.9730993958412	-0.716159614343051	0.729102880105695	16.6402650652685	0.118975948117919	0.546295521286323
ADD3	2701.9569965785	-0.0840416415258509	0.25936014915637	9.59028861356887	0.567573113590464	0.999999999607242
ADGRA2	1299.93981806063	0.182849681410227	0.448186838928104	16.9244894097393	0.110129101553121	0.521563537612914
ADGRA3	3072.8394007399	0.0587338845082957	0.291777403122158	26.054245068942	0.00637036882051058	0.0874722083070904
ADGRB1	97.3512055546105	-0.0810994993705007	0.764907469107475	4.8218832510529	0.939484620804142	0.999999999607242
ADGRB2	70.9285761071878	-0.252248518090281	0.49524340657869	10.9164609711991	0.450288279222011	0.999999999607242
ADGRD1	201.060796817105	-0.267730968600907	0.635465939933088	18.4588817140158	0.071525689308924	0.404957774842801
ADGRE2	22.603944515714	0.407969619033034	1.17959476503405	29.7355742498772	0.00174331690352646	0.0375182665272651
ADGRE3	8.52312496848175	-0.773645430012956	1.38587720922729	13.8949453579912	0.238861203019937	NA
ADGRE5	669.504478137443	0.041874840850585	0.476578814045436	13.2942116066856	0.274531626997516	0.843332296853143
ADGRF1	16.721722485163	1.38810718574368	1.49928224938105	3.50223614229981	0.982289009447392	0.999999999607242
ADGRF2	1246.06445030071	0.0104301452044278	0.278949713201825	25.7219331321598	0.00713710544568729	0.0941792354683201
ADGRF3	0.875497768227812	-3.2620485036069	4.32884309177696	4.94526726965887	0.933788230856276	NA
ADGRF4	1197.61681313217	-0.201512917905597	0.235727516583111	25.5201703982399	0.00764472372458441	0.0987634217712027
ADGRF5	1439.5617469944	0.145431994986651	0.268323105917103	32.2296276818754	0.000700620388395326	0.0214409714604669
ADGRG1	4338.66577116105	0.0587770197814312	0.201606674354723	31.3750526545393	0.00096012314985016	0.0259908696878256
ADGRG2	357.400208193107	0.0702010839646098	0.28510817733304	35.796766389294	0.000182918696992228	0.00901037533739094
ADGRG3	43.1913961233573	-0.212264506804732	1.04637193912179	11.3977886369497	0.410564266936502	0.998075950327328
ADGRG5	29.9336856430146	-0.891469863163336	0.854547944452105	18.9658214323878	0.0617097909882709	0.3713776124329
ADGRG6	1026.84594517556	0.0471916190431058	0.335187603533458	13.1997470849921	0.280470825573102	0.85159486183927
ADGRL1	1618.46609304704	0.0652186863250904	0.321052494049833	8.92917622173354	0.628429703695609	0.999999999607242
ADGRL2	4073.88128060351	-0.0954949744540929	0.245678778666095	10.2155452837821	0.51110937520637	0.999999999607242
ADGRL3	1198.4934383195	-0.301444895325125	0.285820753501411	13.0515305559893	0.289970748852838	0.864968545355791
ADGRL4	309.430944648091	-0.25197506776999	0.496078044602041	16.4340135499834	0.125767675894158	0.565594081796032
ADGRV1	103.321189893368	0.0287354859234898	0.515306305391354	7.34160057295639	0.770783838862364	0.999999999607242
ADH7	0.113023861178011	-0.0253448947500881	14.3166800264692	0.247514971414859	0.999999968047607	NA
ADHFE1	94.0223877399151	0.0436285486468231	0.478767909909379	11.3347378936837	0.415661021645991	0.999999999607242
ADI1	1191.9772094289	0.0103240937172155	0.309295492179403	3.30053776496777	0.986128231573476	0.999999999607242
ADIG	144.316713139401	0.0883935431007964	0.588138881867201	19.2684737682076	0.0564413031070779	0.353860113195846
ADIPOQ	56.4852401763976	-1.35191664986951	1.66622536715745	19.8038413236716	0.048104498510635	0.322315079306506
ADIPOR1	1662.03290512781	-0.0624629324314287	0.175037047522336	6.49665503752067	0.838259557384167	0.999999999607242
ADIPOR2	1202.78630971971	-0.0528769960158363	0.183297189353885	20.2222362894356	0.0423844279092241	0.297515408211417
ADIRF	2607.50635183187	0.341256894692654	0.355087975605936	35.5066488185871	0.00020434519694126	0.00961868520573129
ADK	1413.7014089774	-0.297006189437547	0.280211296072822	12.3106591018976	0.34075075298515	0.921987458304388
ADM	633.128707918891	-0.436925835297248	0.447034217988577	10.7826292771737	0.461649638518903	0.999999999607242
ADM2	430.327180549491	0.751545895876271	0.801748463623139	14.1662110959817	0.223932424914897	0.761867852849348
ADM5	29.1998645891128	0.274066391235456	0.68994495066272	7.81573337710211	0.729708943317471	0.999999999607242
ADNP	3446.84059423561	-0.062441948562037	0.218480624631597	3.01476408814847	0.990529328314781	0.999999999607242
ADNP2	924.212607790077	-0.130897023606206	0.17181078624342	12.3768176812538	0.335995594488635	0.916158603613562
ADO	1781.69977785713	-0.101131638421856	0.187442442937363	7.50439651934721	0.756890340125357	0.999999999607242
ADORA1	35.7072742649615	-0.00702103329368512	0.785662468750632	4.44660783372592	0.954988912313537	0.999999999607242
ADORA2B	472.329748452799	-0.143677876023748	0.24834454463485	8.58926908824503	0.659745995003686	0.999999999607242
ADORA3	121.099213348914	-0.556261733305439	0.628903915909783	21.3693777730747	0.0297400139570817	0.241331754066399
ADPGK	611.623901115583	-0.218718586693832	0.18281808021902	17.6565281553671	0.0899002133695561	0.465725572146234
ADPRH	73.7295901682215	-0.329163589976562	0.615860676770267	6.03157227549389	0.871249365122193	0.999999999607242
ADPRHL2	835.013999615111	0.0653948787926871	0.224967812659935	14.6343776008267	0.199854509001491	0.722586503351255
ADPRM	213.73655737505	0.288048493319458	0.372632143996725	7.33519187356205	0.771325765900205	0.999999999607242
ADRA1A	149.792485209542	0.0899784136334218	0.528361501060125	26.3131894013275	0.0058280855035476	0.0826563317923021
ADRA1B	48.8328712369936	-0.298742012248023	0.684225441801462	8.12841417901086	0.701756573553179	0.999999999607242
ADRA1D	405.814904760104	-0.0988628346844923	0.475810794681381	18.8173851711373	0.0644513064987745	0.380454884105292
ADRA2A	156.857400190211	-0.541726148652016	0.577392321252213	21.5771852389919	0.027861230457476	0.230529644149586
ADRA2C	35.7925518585447	1.07961233256866	0.582125136707629	15.4765569368585	0.161702501347272	0.646959938167343
ADRB1	63.0236047624982	0.104925699803035	0.692595723873649	6.23489690934753	0.857240345140886	0.999999999607242
ADRB2	109.755808906712	0.17868845861608	0.583612667804863	21.8527828630232	0.0255388821817758	0.217288577836445
ADRM1	1972.57133368714	-0.107774413610617	0.210950081653628	21.0955620567597	0.032394410011755	0.252827244115498
ADSL	742.80694775162	-0.147852394468382	0.168345915147975	2.54995046345812	0.99543875291291	0.999999999607242
ADSS	491.480138742692	-0.123053005746571	0.226608069071606	8.75857187394274	0.644166151716386	0.999999999607242
ADSSL1	160.231732551855	0.106167418313617	0.305709011748322	36.2919872415038	0.000151316443018325	0.00786663194727797
ADTRP	3245.53339711698	0.185966312149158	0.500452918751424	18.9442216941068	0.0621021249111399	0.372506953018852
AEBP1	6353.31189112273	-0.00878083719254739	0.452684761572689	18.3979829386035	0.0727936472538873	0.409523582660396
AEBP2	1912.75711703034	-0.123625887431806	0.182799445313956	8.29223491120695	0.686911308265296	0.999999999607242
AEN	391.709463357459	-0.115426432369813	0.303694735852721	18.0094632257914	0.0813612929650083	0.437475363419328
AES	5572.810440219	0.0643008195745965	0.183196215826955	6.20200557654903	0.859551393060897	0.999999999607242
AFAP1	960.870594329543	-0.0250861524738796	0.255178359325247	5.81256085339623	0.885573277079809	0.999999999607242
AFAP1L1	144.242100864541	0.0138411150437827	0.43725888837256	8.14931009669294	0.699869693261664	0.999999999607242
AFAP1L2	1747.21167270408	0.220412708785499	0.317964453033751	14.3498435460286	0.214236011559817	0.747409859917622
AFDN	11537.1208882398	-0.0377396048345791	0.227905948061693	16.6225909437394	0.11954549637363	0.5474543028413
AFF1	3029.4691275774	-0.135288007898481	0.201053834927516	12.0994331841396	0.356215766729664	0.938166319594306
AFF2	14.7157290520715	0.0853432353576441	1.00932270928408	29.4861496487217	0.00190705919447302	0.0398496872840246
AFF3	392.830596552404	0.343373398935956	0.327052716361261	26.64886246371	0.00519051432527205	0.0769454637672832
AFF4	3293.0456150027	0.0467174840552414	0.219347085416379	11.4103528889943	0.40955263648444	0.997161589183444
AFG3L2	1811.58719130992	-0.0519988886142522	0.128902702088575	27.1839542334615	0.0043100713562129	0.0681243879196288
AFMID	101.935297383521	-0.250259651877911	0.450948316658849	7.04025382240366	0.795814354425204	0.999999999607242
AFTPH	1908.61551681664	-0.0142304507586447	0.173869680414579	9.92284833088286	0.53734010930668	0.999999999607242
AGA	540.468034723254	-0.193882683760765	0.182590246963106	23.011795461917	0.0176075526209925	0.171407985470012
AGAP1	824.626232665265	0.185163851615876	0.329729810319983	14.3139089197985	0.216107676153536	0.750101005697825
AGAP2	103.772742383094	0.156399120135098	0.417057332143472	13.4842712293078	0.262854545401124	0.827679383568513
AGAP3	1700.2262317856	-0.021089596583319	0.229572328089511	10.3618311699363	0.498163675995368	0.999999999607242
AGBL2	48.1077696894138	0.0169839778325873	0.394333453744	7.73447496886899	0.736873246731749	0.999999999607242
AGBL5	241.755467393289	0.0970287070147556	0.299260581938117	5.03940242039914	0.929243356265689	0.999999999607242
AGER	59.7976686902195	0.512011994955698	0.517283026663372	16.6904375467631	0.117371685059769	0.543173951683884
AGFG1	1307.03102679443	-0.264814785825408	0.207579680153153	7.55691449639801	0.7523585560393	0.999999999607242
AGFG2	495.931779491759	0.129632404160712	0.233159770878951	5.46135450437009	0.906784948109285	0.999999999607242
AGGF1	1499.91739355577	-0.0507850909038826	0.171401585299795	4.56706431582438	0.950310576251059	0.999999999607242
AGK	379.589917988904	-0.191474293297506	0.192891938320927	9.44277218888135	0.581092747001968	0.999999999607242
AGL	627.282480000671	0.098973397985726	0.292436033901983	16.9107903033298	0.110542225909496	0.522871696135351
AGMAT	12.814266404864	-0.235169246707639	0.78860558629296	11.2384685271801	0.423506909188668	NA
AGMO	176.176793093629	-0.325003745646699	0.4707052842037	11.7536864832838	0.38243978363948	0.96773356774922
AGO1	2534.49686105222	0.0904371471631303	0.200935189471305	4.26839471702203	0.961397971463249	0.999999999607242
AGO2	3489.47194926491	0.0224760844585437	0.274699351071276	4.6968516278489	0.944954605664604	0.999999999607242
AGO3	1647.33364961528	0.00190767583843937	0.29512347660959	8.26114832773749	0.689737130710825	0.999999999607242
AGP	12.9683560351712	-2.09282517397773	1.59381576583047	24.6300090793064	0.0103234040558786	NA
AGPAT1	1087.46348341216	-0.0761922831778794	0.199957143346037	4.63564490979661	0.94752127728996	0.999999999607242
AGPAT2	2453.70671095058	0.0707190651170238	0.229371839217426	10.1618348079948	0.515891510038756	0.999999999607242
AGPAT3	1944.43993601362	-0.0844691208463066	0.191275470796979	13.3127151848608	0.273378798124057	0.842291691471123
AGPAT5	1704.00473774916	-0.00689300128706994	0.279759269895276	4.5583446398914	0.95065867340701	0.999999999607242
AGPS	917.000447764779	-0.146671254547403	0.302355853780698	16.0431972769941	0.139534758451181	0.598501473873604
AGR2	41.2757004913197	2.65140062925265	1.25387301981433	14.2543270180073	0.219238632556994	0.755129351920645
AGRN	4025.85199902994	0.0675527335766519	0.290151458358212	6.36551132011436	0.84789764572875	0.999999999607242
AGRP	1.79081572546234	6.39067624455398	2.58161508218171	16.314908350032	0.129836793329922	NA
AGT	49.0350782344224	-0.324682453995994	1.80821385232319	7.57859755139987	0.750480827328861	0.999999999607242
AGTPBP1	545.650455235578	-0.0816746959351525	0.241022768558219	12.791978085656	0.307138839462549	0.884169941893207
AGTR1	256.323850433182	-0.0246664803241122	0.469198379204637	16.0657485257713	0.138707489218132	0.59639098224949
AGTR2	0.31570881619075	-0.0127961310229101	10.4529580970357	0.550187359864594	0.999997724263181	NA
AGTRAP	445.22855041384	0.142414823694135	0.222604358527662	6.11596008531785	0.865516001665259	0.999999999607242
AHCTF1	2035.67916757519	0.0165057976764811	0.215709192336367	3.98898453594416	0.970238142473444	0.999999999607242
AHCY	13357.7361427471	0.0315299091343666	0.38982488757756	16.9470487702206	0.109451659694886	0.519707678222702
AHCYL1	2504.35488250436	-0.0549462632989306	0.12310138487371	14.2863087816959	0.217553740255396	0.752199029809323
AHCYL2	1633.63020715141	0.06729850276764	0.221272202510123	6.02287725553913	0.871833457809129	0.999999999607242
AHDC1	814.549715171211	0.069653729899917	0.297107956924354	6.69908458044551	0.822902511248061	0.999999999607242
AHI1	578.255826231084	-0.0927248366938255	0.332399262697524	10.568904105688	0.480052651695386	0.999999999607242
AHNAK	91687.3017528241	0.151521886861996	0.290260127202078	10.3918658201555	0.495520714434178	0.999999999607242
AHNAK2	5595.21264431742	-0.018198455461885	0.246746663638478	4.48473698267298	0.953538409265855	0.999999999607242
AHR	1716.62291801631	-0.00097151309960633	0.393131254200318	28.9512292808629	0.00230984597909599	0.0455113488575306
AHRR	76.9638785690454	0.909255827155255	0.671035619070467	24.7327355099642	0.00997398363485264	0.116392145403893
AHSA1	2278.01868748465	0.0171897925008342	0.203970010300435	3.09208557754084	0.989452048305455	0.999999999607242
AHSA2	352.48476722769	-0.0329384537302473	0.261969803432872	2.17160558690068	0.997796483545599	0.999999999607242
AHSP	8.72476410699533	1.46117693020615	1.23139939755372	4.14891488484534	0.965356538754178	NA
AIDA	1831.07980596053	-0.0114920429647215	0.284338912944516	12.7801130073636	0.307939793233396	0.884752209017809
AIF1	265.158747772985	-0.166523181006229	0.599835012365463	16.7365675436172	0.115912952182314	0.538733058398245
AIF1L	1457.98773941411	0.0763921094641473	0.226189686160345	4.54699360880295	0.95110960584508	0.999999999607242
AIFM1	723.505424102431	-0.0762386375098487	0.15792126344725	7.44322412505471	0.762139031284168	0.999999999607242
AIFM2	312.081943192502	-0.0265145660692499	0.386828579180289	8.43244163525696	0.674122183211374	0.999999999607242
AIFM3	37.100566751192	0.649701405730137	0.644420274692561	13.1113843550415	0.286107790229839	0.859144327877121
AIG1	554.473169628672	-0.0792634467916126	0.284480273948137	4.06261388104815	0.968049460288412	0.999999999607242
AIM1	9097.55180797313	-0.0358233802104273	0.25643233008043	23.610946372494	0.0144769510098896	0.150253863157363
AIM1L	2562.78941785983	-0.024126740806781	0.353395550658774	33.4588725170572	0.000443209295842266	0.0159039343996622
AIMP1	3113.78910406472	0.0798792203834467	0.285475484737417	4.17206444465887	0.964610548908501	0.999999999607242
AIMP2	743.222496326816	0.0455444159887217	0.209913793975515	14.0038278333991	0.232781740031381	0.776839294845637
AIP	686.222475530149	-0.0910613722670149	0.225719274498526	3.57342584818059	0.980778916197492	0.999999999607242
AJUBA	3822.98149222421	0.158423924571647	0.157321340121686	17.1870457154727	0.102463277993647	0.500822449807615
AK1	248.287775392208	-0.0964736731196389	0.402746606360279	20.6337277956733	0.0373704728442738	0.276035285844602
AK2	2090.0487423016	0.00201463787439451	0.189762409307003	35.2976046122517	0.000221287851089824	0.0101311095750938
AK3	2058.62633041542	-0.086569726261673	0.258894138238998	24.1460408589728	0.0121313576304391	0.132859919226763
AK4	2525.8424213349	0.0145295137673641	0.306138920233332	28.5606113592853	0.00265462839148877	0.0501129989790437
AK5	6.97115261012887	0.382667156963037	1.25090631735179	12.4324724005568	0.332028479751811	NA
AK6	245.980039914785	0.172063979462873	0.508040819014203	2.67401268810556	0.994370850921432	0.999999999607242
AK7	8.89374240953683	-0.290587894677322	1.08074086411506	9.24047718002765	0.599705830517932	NA
AK8	87.6239142125152	0.381958359807232	0.389923777151408	9.53528429252151	0.572607769382723	0.999999999607242
AK9	2.2712419121839	1.9626569183612	2.37452054541189	8.2780220845645	0.688203753969146	NA
AKAP1	1050.87757289724	0.0797460590766324	0.25703210321514	14.6677472316425	0.198218433886858	0.719686408175202
AKAP10	1092.28394795692	0.0173667132036852	0.138784762920455	29.7282597270099	0.0017479190849165	0.0375704650132737
AKAP11	2713.30594028799	-0.117529354374392	0.252456882779408	9.95255671467044	0.53465971385592	0.999999999607242
AKAP12	1094.24796789224	0.121335264619962	0.450780937617102	8.64379148725504	0.654734237065803	0.999999999607242
AKAP13	4047.08111540563	0.0970512547428032	0.290474691097889	4.32963494608316	0.959264141236277	0.999999999607242
AKAP17A	1036.64554315704	-0.00337003907213804	0.266723665702647	33.6878615477386	0.000406731445050937	0.015053722437667
AKAP2	2164.09503706906	-0.09964181815343	0.294786246176568	5.38157021240204	0.911289576621854	0.999999999607242
AKAP3	63.1894856819118	-0.398285059297375	0.729196679329884	2.80888036041461	0.993018064405236	0.999999999607242
AKAP4	278.412609933952	0.387539519989401	0.443388548628154	26.1450652785669	0.00617490600947611	0.0856055242759499
AKAP5	130.928749648047	-0.0104406512460961	0.309858166611201	12.3421553678101	0.338481640102245	0.919306547311527
AKAP7	95.453737090253	-0.279904828676873	0.430836650684048	19.830938209604	0.0477138231719878	0.321182928155499
AKAP8	1489.82419096207	0.0318677202256628	0.173981722543641	7.16149606894987	0.785858438130044	0.999999999607242
AKAP8L	1449.22154396669	0.0215456891294766	0.258530198441522	7.33488637006917	0.771351589803394	0.999999999607242
AKAP9	4377.88377671318	0.156641558574261	0.237518687614622	10.8823288253836	0.453173495849609	0.999999999607242
AKIP1	333.402852190987	0.12732525769144	0.291633600492068	3.50116705639482	0.982311057088493	0.999999999607242
AKIRIN1	1730.33373224471	-0.10373062515703	0.162123028433991	7.27124500047728	0.776711351079499	0.999999999607242
AKIRIN2	1398.68083761849	-0.113359310067127	0.178162700372256	30.5133154234459	0.00131545923735167	0.031403632692517
AKNA	281.556345077643	-0.125090012669879	0.466156110921471	5.56185741427032	0.900942836896451	0.999999999607242
AKR1A1	1414.93338186009	-0.0795930455220804	0.214443727669663	8.20504372331902	0.694827078541682	0.999999999607242
AKR1B1	474.572216899611	-0.408744262039177	0.472253633214401	8.94567413274797	0.626906964230225	0.999999999607242
AKR1D1	82.3067296903974	0.125638136291571	1.65577329587744	7.99986931224601	0.713315536435228	0.999999999607242
AKR1E2	23.4533328436163	0.0860263390591824	0.688493717284909	14.2753860932577	0.218128060490477	0.75343012288686
AKT1	3809.90019543934	-0.0058307441219875	0.200688497589719	6.0127964461451	0.87250907193106	0.999999999607242
AKT1S1	794.31322497052	-0.0172192206094358	0.20524889238498	12.4702366352222	0.329353896592042	0.90998051147409
AKT2	1803.92771956048	0.0132254095591602	0.202793778343472	15.3846720619676	0.165554934961042	0.655685676325742
AKT3	1240.8328216013	0.185404984654657	0.312017734346307	20.4555359912324	0.0394710455607019	0.284099352117479
AKTIP	2493.15989309272	-0.0549571112153942	0.2494958673325	9.94691914570535	0.535168065636159	0.999999999607242
ALAD	570.526981753055	-0.0222477586011749	0.273283065230454	8.5464748369784	0.663675160095112	0.999999999607242
ALAS1	1434.36544470384	-0.216725370807526	0.195698671062258	8.56618185652303	0.661866282523814	0.999999999607242
ALB	1.67969124695287	-2.81278693871259	2.18567391085751	11.9096662942119	0.370471518917153	NA
ALCAM	4508.34912722418	-0.0451261229947343	0.246387896965409	9.3802087809886	0.586841567278065	0.999999999607242
ALDH16A1	432.891778667249	0.16537275111882	0.240443496002281	18.1994643582052	0.0770662460112987	0.423250256544995
ALDH18A1	945.914345732273	0.104719649943878	0.265588257735596	11.2829532580568	0.419871928132875	0.999999999607242
ALDH1A1	2083.57402136417	0.0789150971729172	0.52545258817066	10.7365909201917	0.465587510514006	0.999999999607242
ALDH1A2	101.527846478373	0.176163469899966	0.768207472457091	32.0214980814492	0.000756694350397229	0.0222496498941332
ALDH1A3	1457.70924664198	-0.215188610384019	0.317064264041105	61.7332527450347	4.41051401569006e-09	6.92049744643731e-06
ALDH1L1	10.359479215856	-0.383921384565034	0.91973585072086	13.0103606705895	0.292648780126094	NA
ALDH1L2	836.001148072204	0.180503421801652	0.450299817077498	23.4813628321743	0.0151060399884023	0.154736053531053
ALDH2	9274.51274710616	0.0833545742216821	0.317450874693005	28.9035668830165	0.00234947800689449	0.0458815450901885
ALDH3A2	6905.60208500951	0.00753791860907074	0.203835100299297	6.01734431771024	0.872204483293865	0.999999999607242
ALDH3B1	150.608841651858	0.36478885758831	0.442060095749351	26.7131720484388	0.00507623618887374	0.0762608145615338
ALDH4A1	1127.82789873188	0.000163446163080323	0.242791651466975	13.119326025603	0.28559794638052	0.858186029687982
ALDH5A1	428.378412269231	-0.254247751974006	0.327235547790124	9.19909733142993	0.603520511319907	0.999999999607242
ALDH6A1	2381.58529620599	0.037328815764741	0.236262211353428	6.30157187668647	0.852503824902406	0.999999999607242
ALDH7A1	2864.2845145303	-0.105171657554149	0.187544468813899	5.21534859309668	0.920290230070974	0.999999999607242
ALDH9A1	1468.19028797681	0.201626569806459	0.195461695735132	32.5940753032318	0.000612019170446837	0.0194181082388096
ALDOA	12191.1995690062	-0.0452405865164537	0.207026657125445	19.6254640103684	0.0507494784212564	0.332227861134165
ALDOB	4.74909434360396	-1.11786953180047	1.53414591873776	10.4098615862841	0.493939678111263	NA
ALDOC	264.558475676526	0.0956853558517309	0.596030474191526	10.4469692599557	0.490685645583402	0.999999999607242
ALG1	295.64317598681	0.0460375192413217	0.285127905871627	3.75396695992322	0.976569270818089	0.999999999607242
ALG10	1139.35619639787	-0.0598941211718155	0.242729532986891	12.4054379265779	0.333951735161299	0.914921737918099
ALG11	744.644663952973	-0.0920229933358402	0.1864735272894	14.801006875704	0.191789394364056	0.706612859333962
ALG12	937.025207382797	-0.103345743688248	0.238562476516389	13.567950377444	0.257828614311674	0.819694581510314
ALG14	507.009049434741	-0.106288777913682	0.331250310639204	11.275572244521	0.420473928366085	0.999999999607242
ALG2	1363.02658465603	0.0819105427026569	0.254744234208666	5.18408209217466	0.921924640694723	0.999999999607242
ALG3	280.861241126826	-0.0732191239142783	0.254701315957744	6.45100816562729	0.841642840077093	0.999999999607242
ALG5	361.629321091411	-0.104803786691046	0.318922034773215	9.49112484517161	0.576655436552162	0.999999999607242
ALG6	349.688806005764	-0.113007543218178	0.333259876328139	7.90709738845896	0.721600977694122	0.999999999607242
ALG8	227.734755663109	-0.14117898168161	0.295045231587581	4.91047479962151	0.935424507011236	0.999999999607242
ALG9	573.1303124888	-0.285997205775471	0.200966991330267	9.40630901076406	0.584442319904452	0.999999999607242
ALK	29.6135255666197	1.22726672470861	0.780380770275566	28.8850322380067	0.00236506637216613	0.0460954762015809
ALKBH1	338.350721539622	0.00877595422920284	0.179581652584073	3.39091621933449	0.984486579395486	0.999999999607242
ALKBH2	82.2939444722794	-0.100299539133923	0.351041361509541	4.51892369468271	0.952213984806799	0.999999999607242
ALKBH3	233.119165691999	0.122370983632613	0.217378833120911	8.38997832989401	0.678002633426176	0.999999999607242
ALKBH4	507.075325943267	0.0494945111158601	0.279047209035038	17.7273661993577	0.0881260981219956	0.45953367177814
ALKBH5	2450.49891670795	-0.0301654542268424	0.157813368703387	7.11123359766441	0.790005338497975	0.999999999607242
ALKBH6	280.265532943443	0.18082858927216	0.321711976985936	6.80958507520199	0.814287353072368	0.999999999607242
ALKBH7	397.386948876258	-0.162893144374364	0.292664963480184	7.76132974656571	0.734510637313467	0.999999999607242
ALKBH8	236.669169937549	-0.119408297249836	0.32446906426358	5.17716339490994	0.922283780446197	0.999999999607242
ALMS1	1228.79591237568	-0.0353161730018905	0.316509931290433	9.6280195579161	0.56412440408664	0.999999999607242
ALOX12	789.560264192338	0.10574478039322	0.352062258012947	40.2027352003447	3.30282920808771e-05	0.00276732194813563
ALOX12B	423.126777190667	-0.17599655370092	0.424726494514213	23.2694947290001	0.0161902719717296	0.161744575656634
ALOX5	341.511393095484	0.20707307836409	0.501567482923802	27.1171397914283	0.00441162473775817	0.0690787040267377
ALOX5AP	190.914074933239	0.0953260186751625	0.61082943428402	29.9384999986848	0.00162021271368026	0.0359445648304902
ALOXE3	557.451841942448	-0.260345285118577	0.302349446116555	12.8911989373046	0.300496069852631	0.876707827719558
ALPK1	215.43089002208	-0.102430236095722	0.394506911633613	14.8383776339408	0.190016300724579	0.70409646855007
ALPK3	276.684000205962	0.662233614059663	0.438878384480655	33.2861706590689	0.000472812905268024	0.0164531265018671
ALPL	168.910561412696	0.201536154586277	0.4133316393907	5.69517021908246	0.892909631726526	0.999999999607242
ALS2	1324.97938499107	-0.182373225305115	0.215007917612517	6.15905043594637	0.862543807254541	0.999999999607242
ALS2CL	865.22346155962	-0.127668267883189	0.304607575245712	9.81195868104555	0.547376856030927	0.999999999607242
ALS2CR12	0.197827225035978	-0.719328519474951	14.275544530133	0.381176054955432	0.999999675355924	NA
ALX3	34.2310541841514	0.298370808060155	0.580041479196046	21.4210922879148	0.0292618191913017	0.238685727429994
ALX4	152.831953403701	-0.0518806922956325	0.530784410450833	20.8886628784263	0.0345430598982372	0.264139018863007
ALYREF	1143.67060594299	-0.059652360322166	0.222639370974645	30.8784854100601	0.0011515532792651	0.0288892581397029
AMACR	171.044051039082	-0.183339688202351	0.425082389202078	7.91494746326123	0.720901873262725	0.999999999607242
AMBN	4.19193695538348	1.42669632643858	1.63224735808099	7.74158360858496	0.736248347991313	NA
AMBRA1	1474.91442636372	-0.0911134169790338	0.199934641366873	14.3116233339887	0.216227144871071	0.750240544498159
AMD1	2102.3462638989	-0.0915676887730952	0.24268126047822	9.52657685220208	0.573405511086224	0.999999999607242
AMDHD1	60.6402138797144	-0.0776546496923533	0.537896517697912	5.40346271787064	0.910065341204939	0.999999999607242
AMDHD2	893.04792165363	-0.30102128170467	0.27700019244906	10.5369220262147	0.482832518410891	0.999999999607242
AMELX	0.282608297261532	0.936645950564727	13.2769447975183	0.289482361443177	0.99999992571053	NA
AMER1	511.139708263139	0.0180846520403058	0.275081061089275	3.13676938619938	0.988792029052177	0.999999999607242
AMFR	3886.58990409602	0.0410197139525271	0.129126804111883	9.56232226459792	0.57013191155564	0.999999999607242
AMH	6.60672586494536	0.590240637160501	1.14712992498223	4.03897670279491	0.96876294915582	NA
AMHR2	111.98142143302	-0.258571802949556	0.531243361052572	13.6109627295281	0.25527257226039	0.815200110462864
AMIGO1	138.404537244258	0.400535758983122	0.449816863022527	8.31202749374347	0.68511016377845	0.999999999607242
AMIGO2	401.460584939475	0.0590921608095334	0.311835866777112	11.9517538377852	0.367280650860645	0.951905521000922
AMIGO3	106.788459882281	-0.0406962489578403	0.433359194329884	2.63613267448829	0.994714180353866	0.999999999607242
AMMECR1	1126.16989278156	-0.215004984194544	0.309363989931162	28.2023114055387	0.00301411538866202	0.0546545599661245
AMMECR1L	1447.73231419927	0.141159518915635	0.162057863089369	26.6694139662401	0.00515372923765086	0.0766839367602189
AMN1	651.0778541406	-0.0730492156033822	0.299111795999039	9.25099362627543	0.598736665348594	0.999999999607242
AMOT	934.561390727128	-0.134472947287183	0.221471371837289	4.48133965532645	0.953668789658957	0.999999999607242
AMOTL1	4602.94648527703	0.0488610275869762	0.238655315201145	6.14263076081215	0.863679888939784	0.999999999607242
AMOTL2	2322.60383642791	0.10190096992053	0.20913018888367	8.14193550165282	0.700535849627272	0.999999999607242
AMPD1	4.2700583806423	0.408075596600117	1.36162836275416	12.5031769531329	0.327032402709304	NA
AMPD2	1070.47572680077	-0.160595781187674	0.215584805158015	10.6378821475007	0.474079679571861	0.999999999607242
AMPD3	1220.18174987823	0.00231808129480732	0.356757129465606	2.61268765738987	0.994918964467325	0.999999999607242
AMPH	12.826902414421	0.875214487959054	0.957420348936644	15.5658757194873	0.158027975481947	NA
AMT	494.790249925747	-0.108496193203895	0.273108535275956	10.7578135768642	0.463770397980394	0.999999999607242
AMTN	3.58099854113154	-0.793162891449417	2.47805637133124	2.99108539458092	0.990843172612249	NA
AMZ2	1059.68425614279	-0.0644221342971369	0.188840898362462	10.093079857758	0.522034520054077	0.999999999607242
ANAPC1	1008.42905074046	-0.0387774767533464	0.199800297318364	9.18402994392329	0.604909969901426	0.999999999607242
ANAPC10	157.157942012239	-0.332986831738288	0.349310744253741	8.73817881683397	0.646045243176028	0.999999999607242
ANAPC11	916.69518156772	0.0292366615796781	0.261011803865184	5.68977873269296	0.89324071445773	0.999999999607242
ANAPC13	803.140408131196	0.0807418181381802	0.256746825052933	8.16161913071471	0.698757232770058	0.999999999607242
ANAPC15	1097.73364514379	-0.11626092540762	0.199644503104396	9.87675873235503	0.541505771657583	0.999999999607242
ANAPC16	1506.25207304846	-0.0405018112978332	0.292412010747572	3.87732760086158	0.973368927530427	0.999999999607242
ANAPC2	1583.62614599453	0.00584717196835718	0.24230176194533	10.0400342403238	0.526789677210557	0.999999999607242
ANAPC4	704.296259823521	-0.179636302366135	0.201630676825862	4.74662996510006	0.942813365158594	0.999999999607242
ANAPC5	740.601113759716	-0.0253664592072534	0.194140559134769	13.3729921967251	0.269647280961528	0.836168176319795
ANAPC7	1182.85299481913	-0.0400017620708155	0.151873614290247	8.54703048052022	0.663624171167291	0.999999999607242
ANGEL1	250.910530282433	-0.31569742321328	0.247186451681656	5.78106055007356	0.887565700059295	0.999999999607242
ANGEL2	1220.40037443888	0.0965689901239376	0.231147660747642	5.21563309685189	0.920275272359335	0.999999999607242
ANGPT1	72.5911347281598	-0.792034085868774	0.608143014577131	13.3758423871672	0.269471742925558	0.835924206127811
ANGPT2	113.206448157523	-0.608499487328246	0.482323099348476	8.85390690929842	0.635375362406607	0.999999999607242
ANGPT4	186.061103688669	0.059834638297997	0.562430176548061	25.3216974530808	0.00817747568480611	0.103016345567339
ANGPTL1	390.61259175025	-0.298982300031857	0.685621875011849	30.5237680342004	0.00131046782858525	0.031371254814676
ANGPTL2	1507.55493394885	-0.60880252776768	0.504831375700214	17.7645957716247	0.0872060157440664	0.456528914692929
ANGPTL3	0.959884014351896	-7.33233742110375	3.43257524196692	12.6562005522967	0.316388447833433	NA
ANGPTL4	692.854325537778	0.0208048022587773	0.389063951136875	10.6624020368353	0.471964015382486	0.999999999607242
ANGPTL5	149.717868580733	0.4780164916619	0.759523115455155	31.6261001830574	0.000875489223177123	0.0244909951248576
ANGPTL6	11.7440126724619	1.2687615687714	1.11115786276465	4.3695208376684	0.957835865332641	NA
ANGPTL7	4.52401592117181	-0.854524109964522	1.73660834850047	10.2826155165241	0.505159232187037	NA
ANGPTL8	88.811789679934	0.646141948243461	0.683601063570544	14.5302202285103	0.205029174931839	0.732805442657201
ANHX	1.74198703993018	-2.30744031723774	2.79687115103844	9.62486064424994	0.564412977824672	NA
ANK1	57.2303408671072	0.036635262444988	0.603194995993388	17.4571268730235	0.0950623436579413	0.479338606934287
ANK2	831.718088021235	0.048791942380634	0.440537983837676	23.1081402263763	0.0170645820268266	0.167539639239492
ANK3	1890.84036225944	0.0378740489770169	0.235021368836184	4.15279064665958	0.965232342895987	0.999999999607242
ANKAR	47.0006768220357	-0.233739562093082	0.517520023989796	9.09762565814071	0.612881388420536	0.999999999607242
ANKDD1B	4.52317604868819	-2.67022098221616	1.44378889413272	9.51204548901205	0.574737243979596	NA
ANKFY1	2137.30726660826	-0.0288309318751946	0.209297008625119	4.29272006807582	0.960558940032585	0.999999999607242
ANKH	1758.84100277517	-0.262961512787553	0.198489163387093	11.8879632690238	0.372123367580435	0.956492825679569
ANKIB1	1290.57971121866	0.0311425182256233	0.189098581347864	5.14472768383712	0.923955247251611	0.999999999607242
ANKLE1	63.4168450563808	0.382173438205236	0.406474630422319	13.0375617424239	0.290877485033094	0.866059236099914
ANKLE2	1108.37647203033	0.0502007222030684	0.258105704000625	7.55250068526288	0.752740313502793	0.999999999607242
ANKMY1	51.1184171364764	-0.357659611146762	0.579298705687516	13.3947190916446	0.268311226362719	0.833595159131603
ANKMY2	828.691369870552	0.118793997935565	0.178571228947978	8.14652054070643	0.700121707616812	0.999999999607242
ANKRA2	556.66894566113	-0.161540398235975	0.234115173760502	6.81429712489569	0.813916490630178	0.999999999607242
ANKRD10	2161.84531015429	-0.0127003347606204	0.189066643200621	21.2668163392467	0.0307098053918854	0.246244919514377
ANKRD11	4373.76535917329	0.0556917409478937	0.301167239276907	7.20859812847652	0.781947909871427	0.999999999607242
ANKRD12	6332.30158557475	-0.234747716651421	0.280609468305959	18.863281369838	0.0635922349890991	0.377346754046305
ANKRD13A	3232.74799267517	-0.0855560429630254	0.142331407584409	36.726800377305	0.000128026871493499	0.00700473160911399
ANKRD13B	285.98926578893	0.0410096207554188	0.27466990237369	28.9667194186436	0.00229710517193218	0.0453648643953313
ANKRD13C	759.151675765538	0.112324059396473	0.228221826841117	6.96686894829134	0.80176013730855	0.999999999607242
ANKRD13D	472.105981959153	0.236540585653568	0.232494614193606	6.113349967148	0.865695075350817	0.999999999607242
ANKRD16	257.843263487604	0.070734952456175	0.259177584494916	9.73495290602693	0.554374218871828	0.999999999607242
ANKRD17	2438.59225100717	0.0333884214018843	0.212328608525531	4.74243950504513	0.942995481397538	0.999999999607242
ANKRD2	18.900770614967	0.283221204453223	0.818534024356505	17.0255379480117	0.107122445044708	0.513494359639811
ANKRD22	1464.83923660619	0.0849148676451454	0.319061156773622	27.03204749132	0.0045442840578693	0.070917127340709
ANKRD23	128.36549917829	0.0768188292250954	0.407540452765474	5.37642605686813	0.911575937704469	0.999999999607242
ANKRD27	1390.28097222798	-0.0102835380161665	0.154439145746228	2.50396005944913	0.995794506198505	0.999999999607242
ANKRD28	967.795535046213	-0.0301913297708704	0.238151122052425	10.7233277536594	0.466724707377796	0.999999999607242
ANKRD29	267.234737837746	-0.23122292109735	0.30103922957389	6.10035393331634	0.866585057104317	0.999999999607242
ANKRD31	35.9805869421481	0.295514022964709	0.907231498407005	8.92082774981247	0.629200222188606	0.999999999607242
ANKRD33	25.8048596768841	-0.880282183423373	0.846708440802086	18.2237579959337	0.0765317580982967	0.421486325710466
ANKRD33B	263.951296500546	0.413264521578918	0.710531325659262	10.3087353628305	0.50284866990679	0.999999999607242
ANKRD34A	32.3684850415058	0.729218428564784	0.90045790194984	12.9700719686724	0.295285995100556	0.871440508960824
ANKRD35	2125.20803763638	0.0812663033873691	0.297265807013043	3.82709333180287	0.974704547918811	0.999999999607242
ANKRD37	59.4139294627243	-0.0205446522682248	0.548931029968055	28.9359937666617	0.00232244386603631	0.0456553315806226
ANKRD39	283.825422087675	-0.0657180709659335	0.239117886821226	14.9298622048016	0.185730444471224	0.69538123027621
ANKRD40	940.87691098941	-0.172344144339592	0.153895522619248	4.91710662953085	0.935114429351041	0.999999999607242
ANKRD42	352.009502743372	0.162932848442704	0.209309388592231	3.564527713742	0.980972215743503	0.999999999607242
ANKRD44	615.772855072842	-0.0887609337733435	0.294230612550153	44.0068753277197	7.24686719310824e-06	0.00107828385994007
ANKRD45	195.903627536436	-0.307992915149048	0.458300347786874	3.32764101663656	0.985649052761653	0.999999999607242
ANKRD46	1105.68496693885	-0.177889725163364	0.223781580765616	9.27301202749584	0.596707967764752	0.999999999607242
ANKRD49	531.892298005014	-0.0673499028280883	0.275094400748747	3.07652141077733	0.989675438997243	0.999999999607242
ANKRD50	980.333508557837	0.0163091880245962	0.251535713385684	14.8635596659295	0.188828841001731	0.70145916509259
ANKRD52	1608.83515344273	0.171783775372177	0.30315623028328	4.06093214245107	0.96810056422721	0.999999999607242
ANKRD53	4.94763029989689	-0.425626718452184	1.29738265340356	13.0920449301087	0.287352010373542	NA
ANKRD54	609.732040341124	0.156955323372687	0.202651997198149	9.49578496858555	0.57622806320962	0.999999999607242
ANKRD6	273.532369059461	0.0436183888755964	0.267959910767211	15.6697796143714	0.153839655238247	0.630107368156655
ANKRD61	36.41293706599	-0.19722166396898	0.640570605106567	7.14556983089119	0.787175371518791	0.999999999607242
ANKRD65	41.9182246377933	-0.454027183789396	0.613489082923413	8.67067585715279	0.652260867213335	0.999999999607242
ANKRD66	92.3788375354551	0.167194979820972	0.570397056297153	23.7658124441489	0.013757476156345	0.144965835444758
ANKRD7	13.7329956594526	1.42037236091093	1.05473066692431	10.9776847649052	0.445134677482153	0.999999999607242
ANKRD9	149.349247210781	-0.0487929912036134	0.432004822990028	9.14426143224841	0.608578237788477	0.999999999607242
ANKS1A	2015.68585432852	0.137606746118764	0.210346398323681	9.33699081656516	0.590817102972827	0.999999999607242
ANKS1B	11.5044004988983	0.0351393983888408	1.00853945391351	7.99810743298588	0.713473353490698	NA
ANKS3	300.429332585819	0.0148291095152297	0.317668711150101	6.38390626416469	0.846561058029191	0.999999999607242
ANKS4B	235.735867025115	-0.474744807351716	0.746398045011599	2.52666198723352	0.995621516742528	0.999999999607242
ANKS6	134.944399319378	-0.0534743138104919	0.496942896636787	13.2372106215198	0.278104647246727	0.847024212366068
ANKZF1	753.833667440799	-0.13766121778864	0.238322178318332	10.2253989551408	0.510233689522418	0.999999999607242
ANLN	1057.46678570192	-0.0791516057115643	0.317906590295352	17.5869462958092	0.0916731200889778	0.470635946679285
ANO1	387.103074574397	-0.534258121767071	0.519806051877691	18.9123464965907	0.0626851780179281	0.374630326335011
ANO10	1074.9712027991	0.0279890338346858	0.284993219282613	5.8026058827146	0.886204811421392	0.999999999607242
ANO2	52.8197696650874	0.562165255249644	0.577122941888664	6.05875195489966	0.869415500599372	0.999999999607242
ANO3	373.137856599792	0.005224597137301	0.470816520291014	16.2497110330103	0.132110706857492	0.582024295713614
ANO6	2004.14361023753	0.0727585637092349	0.242055379274956	17.1050477391968	0.104806468871108	0.507706891023107
ANO7	38.6930966967017	0.206648997986689	0.565034230536716	4.87902052989989	0.936883533190275	0.999999999607242
ANO8	1020.57111016247	-0.237596646428668	0.348957831674759	4.8890720261561	0.936419380635716	0.999999999607242
ANO9	1708.71700578794	-0.0155475118575813	0.31985959697049	13.3537371357376	0.270835308718734	0.838186290252375
ANOS1	700.192647891928	-0.106596569027122	0.352779929715856	6.70805077915588	0.822209401063345	0.999999999607242
ANP32A	3530.55948646887	-0.178098086065718	0.192078386815204	14.0954981912382	0.227754152355609	0.768982134127115
ANP32B	4594.1952944437	0.0322780526293551	0.166117572970761	39.6815743519262	4.0549477376279e-05	0.00316689583490758
ANP32E	3845.15598398979	0.0280806351057358	0.198879746408775	15.439911877854	0.163230070334068	0.650918490830163
ANPEP	3179.73335711803	-0.104290233920343	0.526162933647707	7.21589954200181	0.781339658132696	0.999999999607242
ANTXR1	4539.06765039234	-0.0108382254605911	0.306729515617782	19.728919016919	0.0491998487103739	0.326736971427877
ANTXR2	1362.00953538607	0.0158816483142047	0.445113644650842	23.1167685972155	0.0170167290707936	0.16726129452247
ANXA1	17425.2716162375	0.077879175790376	0.379675738669741	5.74242755707792	0.889985509074637	0.999999999607242
ANXA11	2345.08324871613	-0.0148381130337753	0.242080271422456	22.9506212566774	0.0179606741241499	0.174157997406083
ANXA13	58.0675386195599	0.623912838228135	0.472502194264669	17.4538324324458	0.095149750160006	0.47952655722532
ANXA2	33110.7337015899	-0.0913265186026754	0.221550144769031	11.0661579248181	0.437737537887386	0.999999999607242
ANXA3	796.910103871933	-0.223301339073489	0.289568206454752	8.07081815773381	0.70694633599607	0.999999999607242
ANXA4	3514.82917499027	-0.199857943689458	0.29426314671864	9.80166152379957	0.548311290188297	0.999999999607242
ANXA5	4621.7099423821	-0.0825545954895699	0.387057020099597	21.3091582253548	0.030305947249974	0.244201983909688
ANXA6	1372.06967697383	-0.229425153891972	0.395846891167308	12.1218364834929	0.354555223211488	0.93558351652212
ANXA7	3316.68846647824	0.0123700790142399	0.244329802104359	25.4489039603122	0.00783210264377848	0.100357900246189
ANXA9	1021.35236591588	0.110737125286941	0.412972452352444	23.7865231165881	0.0136638532181937	0.144331766552034
AOAH	64.1606674160334	0.234944066363943	0.822904734125602	8.0716711655017	0.706869597190008	0.999999999607242
AOC1	58.6640211825316	-1.5057169721037	1.77345097665578	6.21600672546651	0.858569707172993	0.999999999607242
AOC2	138.700416567203	0.398159517366521	0.442879918314182	6.5557559094018	0.833834758160505	0.999999999607242
AP1AR	1141.27824713347	-0.052731542334573	0.258077728331263	6.57411152168766	0.832450471552116	0.999999999607242
AP1B1	1593.16701773394	-0.130933549246407	0.20757741856145	14.8538505768772	0.18928597580832	0.702294914542478
AP1G1	3279.90193221715	-0.0672327450280788	0.177673476995369	4.54289147693703	0.951271952720777	0.999999999607242
AP1G2	789.813396678401	0.187088828582176	0.225848947726643	14.2198808967964	0.22106449662438	0.758111109027777
AP1M1	855.584957962169	0.104705139526545	0.21002693657836	9.24931902730634	0.598890982420774	0.999999999607242
AP1M2	981.961535421806	-0.0479821997404376	0.244580122218997	16.7382326811774	0.115860586819953	0.538726758758724
AP1S1	1438.12935143485	0.0167603004978285	0.255126821827414	3.86058944574552	0.973818941727075	0.999999999607242
AP1S2	1692.69733998492	-0.149752793941893	0.250144199867502	10.6387161659505	0.474007651548065	0.999999999607242
AP1S3	373.549426771994	0.199156130591142	0.30753919349142	4.56156809806998	0.950530162067813	0.999999999607242
AP2A1	1468.72348908765	-0.103329369198063	0.184018851866996	13.7821842479296	0.245281317800369	0.798675232421736
AP2A2	1697.39252340683	-0.0525257156786861	0.216382302787207	10.2834881008893	0.505081982191569	0.999999999607242
AP2B1	2550.79238650847	0.0177827101831811	0.161901281323436	6.18156942208077	0.860978707164698	0.999999999607242
AP2M1	5508.0666992164	-0.0464857583656994	0.198568539841231	5.40307352702143	0.910087183106583	0.999999999607242
AP2S1	1484.71197252405	-0.109435793407605	0.235188555781279	14.3542596302054	0.214006861412374	0.746968337305879
AP3B1	2269.43546288065	-0.0755933895464502	0.220010910184164	6.31227451097527	0.851737140245167	0.999999999607242
AP3B2	3.51870195244413	1.90493081733902	2.60315380141123	7.73930468123859	0.73644872094766	NA
AP3D1	3956.21195634116	0.0845691941548399	0.145171449820336	12.2160727402044	0.347622898030614	0.926922790052277
AP3M1	2449.18191055837	-0.175257980840411	0.215089101705143	3.19922742874712	0.98782217817435	0.999999999607242
AP3S1	968.690869825691	-0.245952937770971	0.378638197244399	5.11730481069435	0.925352645045249	0.999999999607242
AP4B1	840.423497706222	-0.203921340610228	0.179799548659725	11.7905588331389	0.379590464053827	0.964554047895456
AP4E1	2579.92659264203	-0.0294457783495239	0.205769678569179	3.65379683190747	0.978973185690589	0.999999999607242
AP4M1	539.704665118347	0.0331161522628083	0.21888783891839	7.60164046806358	0.748481148391868	0.999999999607242
AP4S1	370.044487219907	-0.286297884469148	0.322723887549228	9.3966675017798	0.585328456520748	0.999999999607242
AP5B1	556.072064527765	0.134660545003112	0.311254083597728	9.70187113809106	0.557386660068949	0.999999999607242
AP5M1	1599.49250096749	0.0625556198243953	0.270045620850503	8.43248501111998	0.674118216456947	0.999999999607242
AP5S1	197.593321594157	-0.524666582543783	0.299288123923149	12.0989396623258	0.356252400567494	0.938166319594306
AP5Z1	1060.62187641431	-0.130587490946347	0.257797024603111	7.93011053430723	0.719550432222094	0.999999999607242
APAF1	1033.07530478254	-0.0590049492103706	0.248337068181498	10.5613375004061	0.480709745799093	0.999999999607242
APBA1	155.764345563874	-0.115733167498381	0.461875831409087	12.6936513114683	0.313818833501771	0.891167006620693
APBA3	553.431488704409	0.174393657792141	0.207236013581213	8.94078394376811	0.627358332425859	0.999999999607242
APBB1	715.519593812282	0.0702526746371435	0.250286617073073	10.6567788493342	0.472448848729656	0.999999999607242
APBB1IP	291.11487634153	-0.16013406268694	0.607365894115252	17.0268469557184	0.107083962953171	0.513494359639811
APBB2	1775.07830058346	0.175852663012303	0.229662281431365	6.99016430322854	0.799879455666051	0.999999999607242
APBB3	540.134130671022	0.175668478007106	0.315840269855486	6.94993256959901	0.80312344343323	0.999999999607242
APC	1452.99372157873	-0.0794714254699285	0.245385168371589	6.52503663726077	0.83614085351745	0.999999999607242
APC2	120.269064294382	0.260919504718631	0.477146727271328	7.54273556590499	0.753584339600979	0.999999999607242
APCDD1	9194.0493252917	-0.010803305981214	0.187717748119073	23.6224013207009	0.0144225433154595	0.149959697364356
APCDD1L	790.416363178882	0.398547812470773	0.552969993206502	29.4988372634655	0.00189838265180629	0.0397646657405054
APEH	1259.87493704309	0.0547012156318239	0.171016985076046	9.73559422395715	0.554315856818363	0.999999999607242
APEX1	3159.17444371405	-0.141094755928881	0.203497641032892	19.9527849581907	0.0459924071075348	0.314387701653881
APEX2	331.357985991352	-0.299568487381134	0.213512418676734	12.9981672395301	0.293445214746793	0.869653915956328
APH1A	2063.78002323474	0.0581518634328642	0.143074035358889	11.5072344767622	0.401797396239328	0.988956000239759
APH1B	370.197606160052	0.0648503902819524	0.301947787506336	7.55085233353145	0.752882840660426	0.999999999607242
API5	2888.7174333679	-0.107728100153641	0.190924330733077	6.16904551540074	0.86185013324178	0.999999999607242
APIP	650.881317076358	0.076653241907315	0.332867340347138	7.15927511261827	0.786042250248354	0.999999999607242
APLF	323.13995504245	0.332138858078419	0.370684671357564	14.8335841585408	0.19024300496516	0.704577718397484
APLN	145.165272435343	0.323966886008681	0.566692854717258	10.1337489590036	0.518398036015878	0.999999999607242
APLNR	340.433106319093	-0.135325310618171	0.535699558825968	10.6384625199546	0.474029556592974	0.999999999607242
APLP1	389.617211127197	0.360083619397629	0.214034967149744	33.9166544054124	0.000373216916013541	0.0143818165467606
APLP2	11196.4182106632	0.0749280208999507	0.166218873642419	5.07399387791293	0.92753018735964	0.999999999607242
APMAP	2300.07869460652	0.0183019175377347	0.142285759629801	15.6100955237883	0.156234221356382	0.635740805988624
APOA1	675.953788356618	-0.0709205123996989	0.453827773662375	8.3511413397664	0.681546467729011	0.999999999607242
APOBEC2	221.575229521882	0.327373796848157	0.281674606627785	5.76224352886186	0.888747601014582	0.999999999607242
APOBEC4	0.0901655602715476	1.37298735169433	14.294091603868	0.109311758721837	0.99999999962181	NA
APOBR	606.663949257979	-0.269061079783106	0.537856833346224	12.3886230165671	0.335151569527877	0.916055507281826
APOC2	10.5194134025398	2.20213162161493	1.37203259087009	9.11694370945861	0.611098724107147	NA
APOC4	0.994815396072535	-0.999228952396786	3.08844366458695	9.73926629376683	0.553981713576914	NA
APOD	12428.2617359258	0.128345205761894	0.407500149302621	17.7014489473777	0.0887716079919719	0.461366442017897
APOE	3284.24728510917	-0.282643700893561	0.343935294589857	19.8655770549917	0.0472186017718224	0.31895329518303
APOLD1	122.792873300803	-0.406212375845402	0.555134972597977	18.4629028606552	0.0714426596114794	0.404957774842801
APOM	159.148808300688	-0.226636833133121	0.294210072101869	12.7840032941135	0.307677023851712	0.884641917654598
APOO	480.084738678591	-0.0780302392049036	0.319651791023457	8.08174230976351	0.705963287166866	0.999999999607242
APOOL	482.328092727499	-0.108144930408751	0.362021440887457	6.48959264627081	0.838784978628091	0.999999999607242
APOPT1	638.451763324067	-0.0913874724958607	0.16506130802453	11.6138000398572	0.39336105740336	0.980188087635508
APP	15754.3995488103	-0.0905807761315622	0.154689438273205	14.9116988322885	0.186575198902047	0.697147922630488
APPBP2	2900.78600252417	-0.0296231467629278	0.187936311720438	6.53903097172474	0.83509195119453	0.999999999607242
APPL1	3170.03397271878	-0.0228829336557702	0.241416734378303	17.8889667116423	0.0841929943699878	0.44684528410771
APPL2	1733.3822369909	-0.20428367852247	0.196411590768714	11.2123579643086	0.42564801030275	0.999999999607242
APRT	977.943531916246	-0.213961106117745	0.378617224409608	9.26826206810324	0.597145558359655	0.999999999607242
APTX	298.642670240957	0.197899925760221	0.260260892560276	6.86183592718055	0.81015936041534	0.999999999607242
AQP1	8629.67633417938	0.10877840856553	0.337632982029639	15.4341576314598	0.163471002447086	0.651167667259799
AQP11	43.9221331993845	-0.127276669220764	0.667189896046896	4.53494196191161	0.951585635473305	0.999999999607242
AQP3	6374.21334951647	0.232649630473262	0.355735727454954	37.2367469804617	0.00010516480732439	0.00610487478234873
AQP5	331.214834300069	-0.298836166613306	0.694498091220652	9.05320383092953	0.616981263452162	0.999999999607242
AQP8	658.334310967664	0.453458080002319	0.767334383994901	10.6730700450473	0.471044800057365	0.999999999607242
AQP9	1153.31160931297	-0.27237456512258	0.442385125938539	4.73176993696404	0.943457632842312	0.999999999607242
AQR	1677.98967986549	-0.0841057628699127	0.336626439036747	6.07400137311242	0.868381272140183	0.999999999607242
AR	808.367041824053	0.0865666780881279	0.37632781289409	32.7930938839449	0.000568345196625187	0.0184863215718702
ARAF	852.886101503028	0.15070492848049	0.148649540076722	20.0546942772447	0.0445962066976372	0.307892211040487
ARAP1	1696.17872432289	0.00312012543674129	0.25745727539273	2.11962156458071	0.998029556999941	0.999999999607242
ARAP2	3097.33399984371	0.115341063190851	0.327647247511144	24.7865314753417	0.00979550109592295	0.115406381512375
ARAP3	518.308517373625	-0.0116498792626952	0.35610045740068	13.5048762529113	0.261610437036373	0.825765912363912
ARC	276.525392309903	0.487874562160557	0.499470983270658	18.3659679851415	0.0734681778557575	0.411708035646226
ARCN1	4448.4354409507	-0.0508857540491877	0.175560334810163	5.95317285145256	0.876470340655846	0.999999999607242
AREG	434.919895070292	0.133596929439422	0.322777225683319	14.9713368560318	0.183812906794593	0.691440184856437
AREL1	1348.2792718934	0.0141006267403997	0.159167182935995	13.7299839979934	0.248296281799114	0.803893071256126
ARF1	7008.16205803323	-0.0998861714758792	0.150986505052292	8.23672773408703	0.69195425905271	0.999999999607242
ARF3	4222.31529500989	-0.0595305176657735	0.183398908821127	19.6607406005885	0.0502161851159669	0.330687277795341
ARF4	2075.25975622355	-0.0147205917209646	0.195958005501947	6.83714094355548	0.812114601494121	0.999999999607242
ARF5	945.185489787318	-0.047085119492021	0.237285022570316	12.6780780682217	0.3148856681559	0.89191496425974
ARF6	5989.58122872527	-0.115161805888614	0.127508722851969	25.1165948689556	0.00876502105619421	0.107368284913635
ARFGAP1	1137.63214553837	-0.0908886131304523	0.27692197638427	3.20788422996554	0.987683330616785	0.999999999607242
ARFGAP2	2428.57539405291	0.140038393080767	0.263521959905992	7.09646377259105	0.791218710152647	0.999999999607242
ARFGAP3	835.32084413321	0.0730738657801311	0.353388657345568	22.3190258056588	0.0220149743948071	0.198837497673664
ARFGEF1	2617.46483518892	0.0547410169988862	0.174001721753506	2.9039501528448	0.991935252344408	0.999999999607242
ARFGEF2	1844.44222727994	0.0869216298081342	0.202222602277315	3.33467778296733	0.985522817999653	0.999999999607242
ARFGEF3	499.084772403602	0.309251672699329	0.458605007752845	35.2240620745262	0.000227569215454699	0.0103074118578444
ARFIP1	1390.72317217779	-0.0391081115817385	0.258687148975727	8.56511913268525	0.661963851754525	0.999999999607242
ARFIP2	1012.88826808649	0.12420327868849	0.25027378145606	3.82197093712841	0.974838228147343	0.999999999607242
ARFRP1	1653.96447079017	-0.0185673995053948	0.204920983728464	8.99732147609188	0.622139583368911	0.999999999607242
ARG1	61.2193011443312	-0.696020070291764	0.48067553184416	11.1008898556878	0.434850181957836	0.999999999607242
ARG2	109.039956997881	-0.235866226648714	0.429088207340395	7.75577585356598	0.734999673091495	0.999999999607242
ARGLU1	5104.73921279992	0.0353864008334433	0.211156367405167	7.43921653408961	0.762481735856972	0.999999999607242
ARHGAP1	1842.01683045557	0.146723327270725	0.205241582670709	5.95683843213249	0.876228528695453	0.999999999607242
ARHGAP10	1366.03416308192	0.008966095991663	0.154522979217465	6.38955514175677	0.846149592790609	0.999999999607242
ARHGAP11A	493.99221247966	0.213223285321302	0.365212989913837	16.3368260316131	0.129079787348047	0.57420544578023
ARHGAP12	1158.31311270473	-0.142007781459378	0.191627547973528	6.41495046669831	0.844293937159374	0.999999999607242
ARHGAP15	46.871117812833	-0.991752736145391	0.958772021351327	15.3859465660406	0.165500993828483	0.65562248186358
ARHGAP17	1252.7699245966	0.00551020184217078	0.141333213630355	7.44917701809504	0.76162971135737	0.999999999607242
ARHGAP18	943.168351151206	-0.139601051814628	0.243059483713841	12.9890379469624	0.294042488642466	0.869825553507221
ARHGAP19	488.100114966401	0.136756654936487	0.222654560556987	19.6817772222297	0.0499005830436897	0.329396735002845
ARHGAP20	197.45060198995	-0.0253845853506011	0.4040488336154	7.64897508576053	0.744360192398391	0.999999999607242
ARHGAP21	2212.22907476035	0.233221016104687	0.223148234107106	6.57485627310223	0.832394206846433	0.999999999607242
ARHGAP22	69.46753656323	-0.217275633061419	0.586243009868253	19.0280589961714	0.0605916975002587	0.367725984126042
ARHGAP23	1911.34319102186	0.0871331655670563	0.256698062331058	13.1409567736587	0.284212505111111	0.855960188137808
ARHGAP24	542.837462285835	0.169298610264344	0.290879389540384	24.2304145290725	0.0117959999830758	0.130095181921973
ARHGAP25	277.193863651132	-0.241665380670564	0.325815604175114	18.3224895439416	0.0743930951075435	0.414067985022961
ARHGAP26	364.271887995607	0.21308404507143	0.246895835809232	11.9591560062466	0.366721163044252	0.951248463201652
ARHGAP27	1989.518879881	0.0524697156174692	0.199908597731798	9.70375846948707	0.557214700323181	0.999999999607242
ARHGAP28	859.957577044584	-0.0126502820009757	0.308966206001142	8.49632572826135	0.668273906692541	0.999999999607242
ARHGAP29	3063.68606127235	0.0788522057971998	0.212060243309206	8.7082066981875	0.648805929826577	0.999999999607242
ARHGAP30	806.095615075683	-0.111798766969375	0.427722897884487	9.85528854950826	0.543449222235708	0.999999999607242
ARHGAP31	1243.01270155915	-0.129525151621617	0.309105525863952	23.4616616806015	0.015203905839116	0.155348301969141
ARHGAP32	2178.01757132058	-0.0937134576158571	0.232714746262539	12.712156342088	0.312554297927765	0.889625194959306
ARHGAP33	127.160784368836	0.0416976836162552	0.467146557419522	7.10405688611945	0.790595218905558	0.999999999607242
ARHGAP35	2629.26831633458	0.178827175933325	0.253206622753356	4.25993879928524	0.961687000083698	0.999999999607242
ARHGAP39	856.568204396051	0.286131719862838	0.299027869540841	10.5604984440751	0.48078263323766	0.999999999607242
ARHGAP4	248.587829105425	-0.0315376419887682	0.469859163582595	8.81061973363239	0.639367982438683	0.999999999607242
ARHGAP42	1189.70936309653	0.0205391295049815	0.247001592292524	10.4716646087733	0.488524688404706	0.999999999607242
ARHGAP44	31.68899949619	0.0694334874054511	0.538240980239074	4.74014443324648	0.943095079534421	0.999999999607242
ARHGAP45	469.702080864542	-0.0912587603360781	0.44876909035483	21.805095636512	0.0259274227765041	0.21949621339905
ARHGAP5	4148.45215451224	-0.0357333941051189	0.285734590063986	8.4281144905683	0.674517874582417	0.999999999607242
ARHGAP6	184.68684158135	0.165954838739236	0.398374891350631	11.7433524329299	0.383240565710109	0.968907596917604
ARHGAP8	192.949171010813	0.621271760320689	0.448670849667337	17.6225530922388	0.0907621088850481	0.468187088869076
ARHGAP9	102.765371478086	-0.167214624435227	0.519077071761417	7.75525328524964	0.735045675494879	0.999999999607242
ARHGDIA	6150.72510259838	0.0571220993334597	0.225039127213802	7.58892479851033	0.749585151627516	0.999999999607242
ARHGDIB	834.976167908341	-0.134471058301	0.47467569524229	21.7873505082492	0.0260733995404588	0.219954484881877
ARHGDIG	74.1533721033236	-0.0797908247698319	0.441293820805637	16.9864943998266	0.10827571449595	0.516824898285425
ARHGEF1	1887.75836635774	-0.10590789390354	0.243450354120744	3.91607462145544	0.972307967060885	0.999999999607242
ARHGEF10	1446.75984052896	0.140086799606597	0.237312220780607	5.16899935313222	0.922706385791155	0.999999999607242
ARHGEF11	1261.58159294149	0.102715765919858	0.272299327974379	5.1802071970219	0.922125893842442	0.999999999607242
ARHGEF12	5692.85878452929	0.0880276762623298	0.253522021459393	3.71065397746338	0.97762984560569	0.999999999607242
ARHGEF15	380.764628404542	-0.044925558948113	0.235185990444375	12.5964588837027	0.320516351184156	0.898570092358215
ARHGEF16	268.458517702235	0.0270397080655693	0.327911084552945	16.1852050764575	0.134393290865405	0.586653566094309
ARHGEF17	1320.87419425352	0.0846256027656591	0.302747608722396	2.60226990444221	0.995008097906225	0.999999999607242
ARHGEF19	1414.01609452732	0.0957028620708098	0.348343452598487	12.5490008715017	0.323820708408767	0.902057041177424
ARHGEF2	1222.01578632261	-0.0476390113066519	0.215729782478293	8.94473429031314	0.626993712947208	0.999999999607242
ARHGEF25	661.596072330378	0.185345912365903	0.348585494821197	13.3394204924158	0.271721059411948	0.839836915754041
ARHGEF26	564.289762251129	-0.0387696187743797	0.311322229898414	2.93466643391275	0.991561403126382	0.999999999607242
ARHGEF28	1057.81998427688	0.0656811120586948	0.28911273437893	6.72376769050447	0.82099188229561	0.999999999607242
ARHGEF3	778.274955130792	-0.0607891533163453	0.255462249586383	20.142187782314	0.0434283952026328	0.302619961875069
ARHGEF33	11.4783170895158	0.593727496829561	1.07049625924927	8.99045907456104	0.622773044554196	NA
ARHGEF37	2487.50581217839	0.146092646692449	0.314083998346884	2.99231122469951	0.990827106913936	0.999999999607242
ARHGEF38	10.3168193114477	0.0312482952891799	1.46350477868694	10.2141728975797	0.511231378580405	NA
ARHGEF39	316.159018986413	0.00570157714876901	0.296337707934748	18.8182114647598	0.0644357490164394	0.380454884105292
ARHGEF4	1076.1560053524	0.0535529663971938	0.261114498798578	12.4158662342948	0.333209008659373	0.914375664858426
ARHGEF40	1332.52006832956	-0.0247873521024522	0.351236478481007	7.52603728430245	0.755025770970177	0.999999999607242
ARHGEF5	2589.54522498349	-0.013533466292671	0.237243594016878	7.82912939548373	0.728523523155133	0.999999999607242
ARHGEF6	1150.01520143791	0.237463899987148	0.290768218717251	49.3542150067672	8.17486334486982e-07	0.000223965303702307
ARHGEF7	2625.89467324891	0.0298256058346401	0.263678711190877	7.34250622609511	0.770707224103498	0.999999999607242
ARHGEF9	3.96971386804865	-0.586880596065987	1.23006883786223	14.7895376512147	0.192336175003514	NA
ARID1A	3476.50045730997	-0.0182040387593232	0.195666611114159	6.42686610572605	0.843419966204025	0.999999999607242
ARID1B	2472.12974941226	-0.00325543893089218	0.142408466290796	20.6582505426762	0.0370895486336773	0.274867157328154
ARID2	1160.24864138758	-0.0475380386579927	0.269339903499473	4.31303454222348	0.959849620942607	0.999999999607242
ARID3A	675.602492755727	0.10719690473974	0.34497536275369	29.3802178453664	0.00198101307687163	0.0410471617128503
ARID3B	105.008851044314	-0.0995459890053848	0.376417471847298	9.46614178953894	0.578947464631245	0.999999999607242
ARID4A	1559.14285498155	-0.0835247393177537	0.244250710462116	10.5697711986323	0.479977375722965	0.999999999607242
ARID4B	2280.88377140419	-0.0323812405289202	0.159891662887925	12.3879125865793	0.335202323379049	0.916055507281826
ARID5A	189.435770096877	0.178068986043182	0.464802838773944	8.0454074531707	0.709230605143079	0.999999999607242
ARID5B	2343.49535295747	0.0179744298710516	0.219508783357199	15.0793223610502	0.178894242703852	0.682592434390614
ARIH1	2686.02891087128	-0.0833508931776513	0.190112395063876	5.54829837909733	0.901741829447599	0.999999999607242
ARIH2	1549.04095738821	0.120500010481176	0.111350005168825	26.4213154897571	0.00561495473383291	0.081053047917071
ARIH2OS	65.9649526549685	0.6235966956881	0.371672285609143	12.9136097025876	0.299009342542791	0.875523413735584
ARL1	3127.93656296204	0.00536778899857748	0.221316473637735	5.21242923191267	0.920443625518801	0.999999999607242
ARL10	409.063040389399	0.104504514621487	0.220440407850265	22.115871432677	0.0234907824029427	0.207497903927734
ARL11	5.90144944140179	-2.92496157302566	1.47632139548749	12.6425443462794	0.317328912267219	NA
ARL13A	2.18722199182388	-0.342740681894536	1.87610495404467	3.73506135626218	0.977036186697468	NA
ARL13B	389.257377368762	0.11563894650225	0.236965044633761	14.3738280392852	0.212993728026432	0.745000459639738
ARL14EP	764.808304385235	-0.0295171191048652	0.265365143108118	4.82445164929788	0.939369063168744	0.999999999607242
ARL14EPL	6.81722888853006	1.20145664873941	1.3809265788059	6.96009599481675	0.802305737450332	NA
ARL15	1845.66816387946	-0.00289108313131384	0.34238194557253	23.8807547895221	0.0132454094465191	0.141543301731537
ARL16	589.655992690973	0.0354164534646587	0.17820896134136	4.73226276520381	0.94343633490164	0.999999999607242
ARL2	623.885022493792	-0.0254341066049966	0.290903841428234	10.0353792989789	0.527207591666301	0.999999999607242
ARL2BP	1819.22504172987	-0.0199949301385697	0.225460514336606	3.5948632419412	0.980307830629824	0.999999999607242
ARL3	1042.53163830919	-0.177115111734217	0.255185510024093	4.07806479893054	0.967577497483597	0.999999999607242
ARL4A	1137.6227064499	-0.433776629592422	0.265886186208423	15.1907767854616	0.173928623100663	0.672951174681475
ARL4C	1360.56698444429	-0.345471467012671	0.219624324095608	15.0923234451925	0.178309218825855	0.682095992228336
ARL4D	747.09605603179	0.126414734010287	0.362422468565398	4.16067870555673	0.964978707188564	0.999999999607242
ARL5A	3920.71091681551	-0.0866055198587925	0.231329142492149	5.22145559563455	0.919968816916569	0.999999999607242
ARL5B	1380.16088188239	0.0170966867920291	0.277125625660095	13.199223323714	0.280504006332529	0.85159486183927
ARL6	240.998441606405	-0.238431775499291	0.287256365805295	5.10379949875255	0.926035527096053	0.999999999607242
ARL6IP1	4222.0180756538	-0.0402191936722892	0.187814379139705	7.50675458009368	0.756687363409901	0.999999999607242
ARL6IP4	714.193372589525	-0.00541835931414162	0.275853178118038	10.4504599179558	0.490379971299005	0.999999999607242
ARL6IP5	1341.51228652756	-0.13976783689167	0.213043782048688	20.4040994299347	0.040097176374668	0.287168989305714
ARL6IP6	945.691227963718	-0.0896786786768776	0.233929103753248	8.86576437967994	0.634281414127289	0.999999999607242
ARL8A	432.396128105892	-0.176624956789762	0.229959338001345	8.73124953070703	0.646683604782905	0.999999999607242
ARL8B	4363.39020104732	-0.092249388669414	0.210535291238937	10.4198184129598	0.493065737183862	0.999999999607242
ARMC1	1665.26214660951	-0.0596699759850128	0.184271222470036	5.68788612856304	0.893356813304861	0.999999999607242
ARMC10	974.480169884176	-0.0127052067694331	0.286309882458548	11.8424620993891	0.375600665029916	0.960432409756141
ARMC12	136.096347187861	-0.639079258217712	0.562490946519182	10.3113833527386	0.502614641336288	0.999999999607242
ARMC2	92.9195138110742	0.0722080935809763	0.349979160713409	8.96457606853801	0.625162243474797	0.999999999607242
ARMC4	9.89551448591763	-0.0600581869767822	1.18159922742313	12.7022775128838	0.313228940315273	NA
ARMC5	556.085834439947	0.146179723542578	0.208479997772011	11.3365173571362	0.415516719717732	0.999999999607242
ARMC6	361.00611420296	-0.0800416345017013	0.267641446698314	27.1899256395358	0.00430110517713156	0.0681243879196288
ARMC7	598.78628489822	-0.141993593264962	0.297273515828519	13.405819176977	0.267630482158235	0.833026803845554
ARMC8	1239.91054923089	0.0263397205842495	0.170207957445899	5.14495970712755	0.923943362337214	0.999999999607242
ARMC9	175.719410197073	-0.184185871815993	0.306972004710795	13.6841313228879	0.250967088590307	0.807025574535703
ARMCX1	684.571001000734	0.035280460409258	0.207146347573421	28.0268418126954	0.00320683706264239	0.0567477118243925
ARMCX2	646.106568958328	0.16712692781246	0.253062203597863	15.4071894648653	0.164604024417929	0.653719618374012
ARMCX3	3326.77114586567	0.0215683783832549	0.193897081035141	11.1569855563337	0.43020684853387	0.999999999607242
ARMCX5	428.537721954008	-0.0687876578340938	0.287403189043531	3.30094606948978	0.986121095365381	0.999999999607242
ARMT1	466.313747988804	-0.177233583521525	0.321750595771326	7.26739768716152	0.777034085379321	0.999999999607242
ARNT	1690.71706867676	0.120635178531243	0.177855810896243	4.66526785310543	0.946288164081194	0.999999999607242
ARNTL	563.958413696167	0.219572903187078	0.19442634205012	10.6055383375573	0.476876526768463	0.999999999607242
ARNTL2	37.2373726003893	0.671572504930366	0.76849118760269	19.2012834892516	0.0575747239433443	0.357606280487996
ARPC1A	4783.55871179983	0.0454164259875779	0.156714693460882	22.9430656070081	0.0180047458139863	0.174247701261487
ARPC1B	3500.28700179436	-0.165673191931973	0.312624272372346	8.0726434176629	0.706782126256732	0.999999999607242
ARPC2	5753.5832905327	-0.147433442852382	0.24799611252953	5.54273442817089	0.902068723416549	0.999999999607242
ARPC3	3205.49632716881	-0.175310616102917	0.30238886866999	4.75347129362626	0.942515307428673	0.999999999607242
ARPC4	2924.65165578415	0.0255194746032074	0.215664989613699	11.9202805924788	0.369665241018082	0.953972737343793
ARPC5	3962.19056439288	-0.104036499672601	0.233443964337184	9.21209439645941	0.602322151562448	0.999999999607242
ARPC5L	1853.27220809743	0.0263818042119053	0.226091119310892	17.8247330551727	0.0857375393861161	0.451994480697729
ARPIN	996.115523353602	0.055603326627154	0.202101133093765	9.40678988076752	0.584398128660476	0.999999999607242
ARPP19	3594.35855336552	0.0134219515499616	0.226818534653648	4.58626070637638	0.949539036478262	0.999999999607242
ARR3	2.37502659883381	0.994445307087077	1.62592468214933	11.4155981083215	0.40913070615953	NA
ARRB1	1366.23873982643	-0.207322745518272	0.367219187192407	27.1863207547271	0.00430651583740636	0.0681243879196288
ARRB2	312.248296799815	0.0114354006020853	0.304430935718433	7.17025426866064	0.785133076542388	0.999999999607242
ARRDC1	945.227050296522	0.0200382527934346	0.25391848372409	15.7041590886541	0.152474061012406	0.627492201495975
ARRDC2	832.498907700731	-0.0919918716324262	0.248937071501369	4.66021141439614	0.946499857426435	0.999999999607242
ARRDC3	5252.9424922195	-0.11174339630787	0.289018259888103	10.1220146508426	0.51944643807207	0.999999999607242
ARRDC4	3294.01186726999	-0.128532934732601	0.244055377353647	16.2862551869689	0.130832058798379	0.579212403776345
ARRDC5	107.093869489672	0.0169264492928785	0.51690778346839	20.4315443316582	0.039761972124288	0.285597852211906
ARSA	473.870853085956	0.0163706955718408	0.337340589812762	7.82845047660999	0.728583629716731	0.999999999607242
ARSB	671.254281774292	-0.330198693681142	0.350289789891792	6.86333802243018	0.810040187029831	0.999999999607242
ARSE	157.785422533684	-0.0712144718892298	0.475083169114376	13.7939771306643	0.244603954368346	0.797631636576168
ARSG	146.247810748844	0.216087359047497	0.502292151803094	15.1271957873109	0.176747595721601	0.679080477324103
ARSI	49.366675927209	-0.469436200611321	0.782885081089842	7.54746423788777	0.753175726518812	0.999999999607242
ARSJ	297.455153396986	-0.0445038217284015	0.311012966815608	10.5043800483888	0.485667713497168	0.999999999607242
ARSK	168.127627585532	0.134270001691952	0.557056546816266	15.4651166172206	0.162178142116163	0.648111769605226
ART3	17.9411499648039	-1.29257805589641	1.08469180401664	2.32348396279133	0.996998152108432	0.999999999607242
ART4	11.527087680148	-0.597140448015874	1.22201231714133	25.7395078426257	0.00709444299597054	NA
ARTN	25.3061869013582	0.0223776682147116	0.851985643950523	3.0217096827887	0.990435857451325	0.999999999607242
ARV1	632.619789027153	-0.0418496468008793	0.216981010535048	7.12617206095638	0.788775689666461	0.999999999607242
ARVCF	330.83242865863	-0.0505008252122509	0.322771936817706	5.97730503649939	0.874874224934828	0.999999999607242
AS3MT	282.634871429413	-0.0478156301295248	0.283996274243042	2.96237661940177	0.991213801997289	0.999999999607242
ASAH1	2437.02802235889	-0.1666797364676	0.242604056070626	18.6964334077111	0.0667650735580412	0.389049685891895
ASAP1	640.668723787866	-0.0201560897925863	0.315329228955553	30.7020437805951	0.00122811057185328	0.0300243462750533
ASAP2	1247.90390685734	-0.171965982940296	0.162292420463434	18.5610154975139	0.0694431325672534	0.398732025319625
ASAP3	1929.633487861	0.0181809281228036	0.252629451229879	9.0857553433591	0.613976871667582	0.999999999607242
ASB1	1246.2719233554	0.0516313841568986	0.421482913154178	3.05079699393661	0.990037387005421	0.999999999607242
ASB11	305.838259905763	-0.11531324273345	0.364368863025471	4.35836818065161	0.95823829935092	0.999999999607242
ASB12	41.364561869402	-0.446294655523509	0.536080574930725	2.30872486241788	0.997083859635343	0.999999999607242
ASB13	807.03918170446	0.0844380387188341	0.336912470359522	31.4989103817628	0.000917419457380987	0.0252080368186003
ASB14	31.3334374118626	-0.793133613309253	0.829927754350759	15.8203892785696	0.147930936651121	0.61867147388756
ASB2	94.0552126117253	0.347310236588841	0.575225162992028	18.2454174812789	0.076057987426731	0.420150939375719
ASB3	743.542156211937	-0.149115265262891	0.223861573930079	4.17257782400043	0.964593891463102	0.999999999607242
ASB6	563.610082547125	-0.0453110611172347	0.210484508297239	14.554333618769	0.203822008287965	0.730626762834949
ASB7	590.671698029272	0.0367506066216431	0.225378535509814	8.24156903615153	0.691514917246539	0.999999999607242
ASB8	1048.88705053415	-0.048732387656923	0.172073569721811	6.5096666168788	0.837289662087523	0.999999999607242
ASB9	52.8550497477798	-0.611169391679774	0.399098541663961	19.4077674904606	0.0541553079065321	0.344578714006402
ASCC1	859.99985054822	-0.0865477763396814	0.321130213046648	5.27870419105022	0.916921292338945	0.999999999607242
ASCC2	1506.19737458297	0.0241735022169677	0.173361428342822	22.9438289006548	0.0180002889676857	0.174247701261487
ASCC3	1888.15261197889	-0.0129762638664697	0.288989215520885	23.4032034279358	0.015497819354896	0.157335308838279
ASCL2	413.929839884252	0.110682215348916	0.372548895043125	10.8040073575112	0.459826142409171	0.999999999607242
ASCL3	0.437455674466333	2.67836454510863	7.4436490005015	0.841895558243493	0.999979105630572	NA
ASCL4	24.1875366090043	-0.440994789244232	0.604996716702332	14.9682139643142	0.183956739794945	0.691440184856437
ASF1A	500.273913580274	-0.203932183774624	0.266729775881097	6.03373214092437	0.871104080897515	0.999999999607242
ASF1B	201.552827154222	0.0245055169881236	0.366884889684238	37.4404690960217	9.71966482493727e-05	0.00587150710635808
ASGR1	33.5883938005475	0.0907255533107618	1.11762101920188	16.0150767453875	0.140572083772811	0.600860367983833
ASGR2	15.0171161984159	-1.09286577065971	1.66128250185827	6.86757709409017	0.809703716899856	0.999999999607242
ASH1L	3614.68388320199	0.119924338416929	0.261677695130214	5.22627570540567	0.919714631193172	0.999999999607242
ASH2L	782.800251219034	-0.0251951583494494	0.161941353174983	2.22657883101442	0.997528395061903	0.999999999607242
ASIC1	14.3451483391798	0.285745195549564	1.00528898011666	16.9794108026545	0.108486087610852	0.517542806015288
ASIC4	273.788857470166	-0.0815258866954574	0.562306990936611	3.33036134977669	0.98560034145907	0.999999999607242
ASIP	2604.38572794192	-0.137328385544804	0.577434963974768	2.59319125600791	0.995084848930286	0.999999999607242
ASL	1350.45551728534	0.12383659277299	0.446168138084694	14.6788680798284	0.197675528639885	0.718744391052122
ASMT	6.04171369455723	-0.607592263800292	1.42403116431416	7.15903621909143	0.786062018572986	NA
ASMTL	654.009309121947	-0.0771226684451056	0.329135219204137	9.69904140859148	0.557644506181247	0.999999999607242
ASNA1	1814.235543159	0.0521704750305844	0.184379892907853	5.43249347287156	0.908428130696361	0.999999999607242
ASNS	1500.63482072003	0.00260518699581004	0.301033473771126	13.3212511074265	0.272848147227063	0.84170849350118
ASNSD1	1040.32773441218	-0.0803145077894064	0.27657482259578	4.21330260640946	0.963256717763844	0.999999999607242
ASPA	382.704382051344	0.174903760738011	0.558300853665822	10.7503777929635	0.464406702944381	0.999999999607242
ASPG	121.01422028521	0.243408245493073	0.431419788832563	8.52054973400709	0.666053339083541	0.999999999607242
ASPH	1678.17768696682	-0.0228760564649587	0.232669851418866	18.3419716554386	0.0739773853277496	0.412952674889055
ASPHD1	0.32767572269583	-4.41154933066149	10.2926036481721	1.07241197166744	0.99992819154811	NA
ASPHD2	143.596916688832	0.129540263670478	0.426722070892029	15.1267205975124	0.176768801311597	0.679080477324103
ASPM	676.94972059792	0.174216686871742	0.418269821720397	22.0250518651872	0.0241798802914049	0.210037611388852
ASPN	1663.7168966532	-0.170312993938026	0.513379685612496	32.033392903114	0.000753375287808872	0.0222496498941332
ASPRV1	17245.8606526712	0.0193643705529449	0.345462532604446	11.5883849539418	0.395364004001922	0.981848919304418
ASPSCR1	958.895300462874	0.0501768243988414	0.212964891914748	17.7761089978918	0.0869231863145131	0.456016472884041
ASRGL1	743.017599619837	-0.9335632769188	0.605577035784216	9.93167459577728	0.536543380924651	0.999999999607242
ASS1	1311.73737228978	0.0866100637983599	0.362281766787367	27.5796523334492	0.00375309013782135	0.0624290220793626
ASTE1	284.97236529635	0.0968042561684813	0.346463278595428	8.74569353364154	0.645352873822455	0.999999999607242
ASTN2	98.0991590899331	-0.514761672768677	0.513746869198056	12.433319922855	0.331968302039873	0.912798712139725
ASUN	592.278376935652	-0.219877189786592	0.23190263004285	7.34414060554843	0.770568942094593	0.999999999607242
ASXL1	2193.18280976899	0.0651598933356194	0.198229289989596	4.58558363739166	0.949566370962932	0.999999999607242
ASXL2	1829.55994990689	-0.0196502049877656	0.26029826756219	3.47328951687757	0.982879459593499	0.999999999607242
ASZ1	0.291343855527177	0.962230155409295	11.6876834730237	0.59240606774928	0.999996642545075	NA
ATAD1	1716.75742740644	-0.11747578595204	0.239313440169292	7.81431603951614	0.72983429411607	0.999999999607242
ATAD2	709.037631734728	0.123659708862561	0.318914510254767	7.44722690433878	0.761796594777393	0.999999999607242
ATAD2B	1755.74196630674	0.152559832763067	0.321716514741575	8.81868715678104	0.638624006412335	0.999999999607242
ATAD5	310.694399831831	0.137060752993193	0.31959681393362	21.5245350132021	0.028326562739998	0.232706555398556
ATAT1	365.45545082061	0.137552887415034	0.288491870683222	8.11919621074958	0.702588278403764	0.999999999607242
ATE1	899.469662930116	-0.0308055963540083	0.20924160801029	15.8107000963233	0.148305342158631	0.619344351719809
ATF1	1022.85396245475	-0.0843275980372829	0.32186826885212	5.70052157993587	0.892580500493198	0.999999999607242
ATF2	1316.75417311767	-0.129632205717694	0.242379166508161	10.6153030540468	0.4760314211792	0.999999999607242
ATF3	417.814420088327	0.0379649213361051	0.385128884549496	3.91338370872757	0.972382519695569	0.999999999607242
ATF4	11046.6230655843	0.114421341521043	0.190731476091316	17.310743771465	0.0990139968383213	0.491000337244519
ATF5	927.263573656659	0.0984889096698106	0.29654606114688	3.3806609461825	0.984679190208492	0.999999999607242
ATF6	1677.79443996897	0.00944116639005501	0.228567329800664	5.80011962890342	0.886362267306573	0.999999999607242
ATF6B	1369.49033960259	0.0490154215875986	0.22316069679255	11.4226465592427	0.408564090891574	0.995737956620808
ATF7	1930.86995445888	0.00685955581257904	0.231328276746699	18.1486417312668	0.078195067563086	0.426968322093915
ATF7IP	2189.38023875298	-0.177940198010516	0.22498544336905	8.32712573203821	0.683735214496613	0.999999999607242
ATG10	286.92859549607	0.272223270011518	0.266033589303451	9.47882220743941	0.577783940492812	0.999999999607242
ATG101	790.954474975565	0.134915229446067	0.230970903021481	13.7453010085143	0.247408786475484	0.802834302419036
ATG12	1345.49308061683	-0.0336625869299391	0.232858663553186	4.43488203058291	0.955429342080984	0.999999999607242
ATG13	1716.81677371949	0.164994699658393	0.172374425597492	4.41361236858791	0.956221484574612	0.999999999607242
ATG14	959.326350076301	-0.184001584830533	0.194118021752887	7.00527003716923	0.798656562405747	0.999999999607242
ATG16L1	1343.0108547354	0.252327710809851	0.215130344073765	18.3687708291861	0.0734089037608934	0.411509476749925
ATG16L2	292.262291881988	0.0880274962113992	0.363668974136702	11.8396381769356	0.375817104092361	0.960432409756141
ATG2A	1958.13953875127	-0.130575569651728	0.270308246533241	9.99679083568492	0.530675841580417	0.999999999607242
ATG2B	1615.92825832946	-0.0379831322125279	0.238652127309544	5.04749602639993	0.928844585196505	0.999999999607242
ATG3	1281.02299940101	0.0277098984665778	0.214547955803405	1.04634048119078	0.999936594907195	0.999999999607242
ATG4A	369.722216184674	-0.0306259644887809	0.20967634839303	13.8678447496129	0.240392642275012	0.790319429650802
ATG4B	1649.07576434025	0.00221272785079592	0.252327992830943	17.6111555973143	0.0910528551152607	0.469266132961899
ATG4C	484.331376396577	-0.0588479319479874	0.320435028764907	5.62957625577485	0.896902292899498	0.999999999607242
ATG4D	976.742953021038	0.00827814054258701	0.214813523768835	12.8505460544962	0.303205830704771	0.879699552523844
ATG5	1106.29244669686	-0.139045337154258	0.261994564265395	3.06623525045302	0.989821250238701	0.999999999607242
ATG7	521.36415239044	0.275262612776522	0.219715988533229	13.2453902409778	0.277589907886359	0.846300806239386
ATG9A	883.789560763947	0.0760493907900002	0.213695130853027	10.2251672115995	0.510254278411675	0.999999999607242
ATG9B	2707.80887015364	-0.0427132298572661	0.427703511998877	16.3714922959864	0.12789004619084	0.570973149832877
ATIC	747.679152126657	-0.00526683970280636	0.221170169266842	1.83990004951215	0.998984277032196	0.999999999607242
ATL1	120.95547043781	0.195247573754934	0.488065381432664	7.07687188898774	0.792824515619506	0.999999999607242
ATL2	4380.64520448147	-0.0802197424639177	0.250043842296794	9.72321511115479	0.555442645489242	0.999999999607242
ATL3	971.083717462957	-0.0617272012845748	0.421095424392603	6.07917351567141	0.868029627988503	0.999999999607242
ATM	1186.0808382099	0.144531637617034	0.37752202167018	7.69541528203558	0.74030032368663	0.999999999607242
ATMIN	1054.85736162393	-0.121970056156819	0.206152449862203	5.34799456228416	0.913149686686186	0.999999999607242
ATN1	1904.37332395537	0.120338626223446	0.270802394788812	4.46240760872911	0.954391266375661	0.999999999607242
ATOH8	187.226269851935	-0.0796492471488597	0.386108049926364	15.8530961363614	0.146672854431907	0.61550534099069
ATOX1	2047.30547822795	0.0683025094067937	0.295502995220265	9.48280878070614	0.577418218823334	0.999999999607242
ATP10A	286.255300230612	-0.106381662444306	0.335966332848262	5.88796763063056	0.880733743609874	0.999999999607242
ATP10B	728.476626275141	-0.0592910900069476	0.326224220406056	10.4229350667121	0.492792300653625	0.999999999607242
ATP10D	1120.55477084322	-0.102218567688282	0.236775643663483	4.88365847883256	0.936669608764281	0.999999999607242
ATP11A	1595.50751558963	0.0572023816517404	0.224919633445745	6.70258178757172	0.822632294796194	0.999999999607242
ATP11B	2870.16303489598	-0.0201858679246638	0.219185497502325	11.1721903137234	0.428952580604055	0.999999999607242
ATP11C	716.035772581978	0.065068716456619	0.29712695420904	12.3269767419866	0.339573963197048	0.920438461970606
ATP12A	359.41117318464	-1.61812188199053	1.29277412184627	6.40002519856671	0.845385696393422	0.999999999607242
ATP13A1	1304.62899902918	0.0497196907475505	0.190880216378555	11.3272322071521	0.416269970774755	0.999999999607242
ATP13A3	2346.18171908286	-0.109783405232946	0.218196839822732	7.85584403944199	0.726155998646469	0.999999999607242
ATP13A4	840.930250912929	0.335403300055614	0.392812740631642	13.8055192722318	0.243942335851256	0.796525570442104
ATP13A5	432.653074969645	-0.352793734511077	0.508512899114781	22.35989900958	0.0217286924458366	0.196973335932321
ATP1A1	9546.31020853241	-0.138889843255225	0.158566012793384	20.9469439678958	0.0339249163755255	0.261286950754829
ATP1B1	2153.52601949237	-0.12774574608492	0.27876007907028	3.84929749170783	0.974119714424798	0.999999999607242
ATP1B2	338.918135227962	0.147235679358083	0.257743246470714	27.1424077376255	0.00437295228885806	0.0687481954481322
ATP1B3	2334.62198664553	-0.118746401416525	0.242853153363747	10.9299012404815	0.449154525843462	0.999999999607242
ATP23	431.585742460732	-0.0103549819158106	0.328841383151378	4.49819185070976	0.953019854627092	0.999999999607242
ATP2A1	9.49603969524099	-0.41172730827402	0.996874688750994	3.7066705890465	0.977725759820826	NA
ATP2A2	5089.82274174388	-0.031743994153195	0.195640124786705	10.2188506519744	0.510815573115927	0.999999999607242
ATP2A3	305.492823445153	-0.0862374134184052	0.503993868243566	19.7004062460722	0.0496226011022396	0.328407245024791
ATP2B1	3444.63261865018	-0.17702769417493	0.190351932428915	22.5626758946771	0.0203590532229464	0.188315787046117
ATP2B2	624.966323984375	0.673399372136627	0.714478843961441	12.3155069705711	0.340400866049255	0.921474113552406
ATP2B4	227.330382493025	0.120399226165262	0.499624382262543	6.53717975179768	0.83523086274108	0.999999999607242
ATP2C1	3460.6450048483	-0.0498336127015	0.189753162525126	9.77344056972402	0.550874255750553	0.999999999607242
ATP2C2	687.051615631019	0.0356697508689259	0.445276834351177	15.3042513117103	0.168987541937321	0.662892039508675
ATP4B	13.23804110328	0.347185799815962	1.1507833971545	12.2399764149236	0.345878022868578	NA
ATP5A1	12908.7027105442	-0.121967003774421	0.176677315161321	16.7819307161192	0.114493555215436	0.533952651450535
ATP5B	10963.1661288256	0.0137373128127232	0.153201469833672	30.9704362943914	0.00111351236585076	0.0281394193771364
ATP5C1	4192.13426277156	0.016324608455032	0.282627152165502	3.99572134261962	0.970042016920185	0.999999999607242
ATP5D	3785.12999797354	-0.0602989144028891	0.241473872690132	16.5354832774747	0.122386450765959	0.55629206809663
ATP5E	6433.31242609171	0.0993509433690816	0.346859604033988	9.08764743701045	0.613802250495175	0.999999999607242
ATP5F1	6796.61649620813	0.034868212898579	0.336724595416119	3.72391354389401	0.977308608315629	0.999999999607242
ATP5G1	1183.12744671722	0.0170392017791077	0.245415905576794	17.8126745110308	0.0860302465702482	0.452846006649126
ATP5G2	6324.61534869604	0.089002209781711	0.234105896201152	7.92313759027115	0.720172083754632	0.999999999607242
ATP5G3	3966.14779930592	-0.12979766551336	0.239083871739034	14.142163827182	0.225226571934084	0.764035108408468
ATP5H	4171.43946567991	0.0522385693969126	0.211517235766175	13.200069451439	0.280450404736152	0.85159486183927
ATP5I	5876.74356390892	0.237013561977693	0.381919260090735	9.50806841406529	0.575101816071319	0.999999999607242
ATP5J	2356.94894428874	-0.0831334835409476	0.27164267082075	7.49235376879756	0.757926208394313	0.999999999607242
ATP5J2	3588.51667080257	0.204615511830517	0.28102988329576	11.1456429362165	0.431143723653135	0.999999999607242
ATP5L	4101.01928890138	-0.0547490965850976	0.311125753434414	3.59924057650596	0.980210699520342	0.999999999607242
ATP5O	4973.39799580297	-0.010800357278149	0.351768944112492	3.33699179395171	0.985481140967568	0.999999999607242
ATP5S	492.639459837404	-0.0209538844117922	0.314155154406981	1.72380136834033	0.999255269277388	0.999999999607242
ATP5SL	704.652951092833	-0.120282854999205	0.186683870199447	8.47007796827745	0.670678186243536	0.999999999607242
ATP6	0	NA	NA	NA	NA	NA
ATP6AP1	2107.28454634434	-0.0666044820625139	0.134812879335689	9.58501724683515	0.56805525502219	0.999999999607242
ATP6AP1L	2.43055039666155	-1.20920990126021	2.48617706683521	14.2747187724055	0.218163186143532	NA
ATP6AP2	3635.29239832371	-0.184100763649652	0.1830925134516	5.63851010345888	0.896363042390885	0.999999999607242
ATP6V0A1	2527.1099584611	0.0884874520176194	0.161558672263712	10.2196324717444	0.510746088479678	0.999999999607242
ATP6V0A2	1609.82647718999	-0.134418978644767	0.198789663600739	10.9470461124832	0.447710223106817	0.999999999607242
ATP6V0A4	379.362450900511	-0.339633386273288	0.605703061270057	25.2150674966914	0.0084780946050433	0.105048035091922
ATP6V0B	2644.96490256027	0.0432494810388255	0.209325754871785	10.0127296070525	0.529242476217998	0.999999999607242
ATP6V0C	3426.5349984511	-0.230803991900606	0.218587194226303	7.32366461717129	0.77229953134148	0.999999999607242
ATP6V0D1	3266.36151459097	-0.175752429296843	0.199093873788788	11.0358781870339	0.440262425876825	0.999999999607242
ATP6V0D2	145.773311974078	0.189812047809904	0.675334540245037	3.94578628549425	0.971476115873494	0.999999999607242
ATP6V0E1	6364.53733048362	-0.157179590974922	0.276875602266951	5.62037315669613	0.8974562895252	0.999999999607242
ATP6V0E2	211.559430727519	0.0606887929626838	0.334778119281728	12.0983435508795	0.356296652661685	0.938166319594306
ATP6V1A	3667.20297920724	-0.0560171459513915	0.245118035629551	6.73852389340232	0.819845832874404	0.999999999607242
ATP6V1B1	5177.07470570789	-0.220070373040129	0.276002660747485	24.118377128297	0.0122432587698041	0.133745978713176
ATP6V1B2	2523.6996214045	-0.114012091853944	0.146786347796794	16.8450792402894	0.112542362577419	0.529234683607609
ATP6V1C1	1402.19588358114	-0.0543753584705192	0.21712352289736	4.32566597329014	0.959404601612848	0.999999999607242
ATP6V1C2	4134.31310386632	-0.151923627806419	0.370524819520177	10.4284055664916	0.492312492480643	0.999999999607242
ATP6V1D	2637.18009958049	0.0705499497552987	0.238638252063768	10.1737908226949	0.514825709254915	0.999999999607242
ATP6V1E1	5185.97220463029	-0.152931215112347	0.257063981987141	17.2959316463184	0.0994216663508819	0.491590231654358
ATP6V1E2	11.9001210875918	-0.390736187008521	0.879408081886671	10.0254367238268	0.528100558515374	NA
ATP6V1F	3143.2064391629	0.0853155618591371	0.270460906607917	6.00117143843386	0.873286079919419	0.999999999607242
ATP6V1G1	3753.12751380462	-0.13504140242488	0.258097735308732	2.98904987340393	0.990869806436967	0.999999999607242
ATP6V1G2	10.0402753358387	-0.184022044828516	1.28074414722979	3.51249989981528	0.982076398391788	NA
ATP6V1H	1783.94928612719	-0.0732565043844641	0.154109742918342	19.7978295112375	0.0481915673497828	0.322522858649574
ATP7A	1040.28616670009	0.12586590427736	0.576202901019331	4.64467876884032	0.947147035466879	0.999999999607242
ATP8	33.5659383178116	0.148138550603868	2.75161507857645	4.46711755626347	0.954212174399866	0.999999999607242
ATP8A1	1000.68528130051	-0.170658363587993	0.301277333218703	9.20580591431906	0.602901942580781	0.999999999607242
ATP8B1	1109.44930394796	0.0554205752001219	0.232373979115642	5.72482321951077	0.891079436760521	0.999999999607242
ATP8B2	2085.30431163943	0.0834618428473255	0.24203822926794	12.3822466842687	0.335607277737	0.916117239566069
ATP8B3	211.300123294692	0.103698535303469	0.2798403527311	22.3726397961112	0.0216401662047895	0.196477409988883
ATP8B4	115.906497846758	-0.396819808451323	0.727439541324487	12.462397188709	0.329907959477785	0.910867371339806
ATP9A	3300.83918598587	0.0404931570777447	0.223254240066869	3.4629028064744	0.983088042813585	0.999999999607242
ATP9B	1177.42991640718	-0.024950568824967	0.133367402986089	11.7678878304962	0.381340906829312	0.966164997729235
ATPAF1	983.272183716625	-0.159232823669334	0.147895553593058	12.4934565201376	0.327716346995762	0.90811082466042
ATPAF2	295.960554948733	0.153647139397634	0.246192721150147	15.8732673010312	0.145901383354756	0.613754195173501
ATPIF1	2666.85302977658	0.14256356628047	0.283844129276461	12.9872697031894	0.294158270905078	0.869825553507221
ATR	578.178518926799	0.0305472077069641	0.253233606861492	4.95909290511361	0.933131488552456	0.999999999607242
ATRAID	1263.70312309434	-0.0625956708329038	0.205403222818466	4.14852853423565	0.965368903658338	0.999999999607242
ATRIP	271.91990275036	-0.0859033680553373	0.312297074344092	9.1951409511322	0.603885332784547	0.999999999607242
ATRN	1857.95062271492	-0.0094346283259393	0.185623315770455	5.63646528062236	0.896486595668843	0.999999999607242
ATRNL1	384.672520651261	0.154643602337144	0.5133161341228	14.9913678769205	0.182892453539663	0.689843476419269
ATRX	1439.70472808717	-0.0761626601824446	0.319517653081163	10.9527504876569	0.447230167549633	0.999999999607242
ATXN1	1249.54722030014	-0.17685971860735	0.249682286720681	21.6430241379815	0.0272892936495425	0.226994317296917
ATXN10	3057.29075056168	-0.00263455586454367	0.141391954088094	5.78736263107021	0.887168476151119	0.999999999607242
ATXN1L	1438.53312736871	0.089283827655362	0.250716893550319	3.52811564375179	0.981749637748912	0.999999999607242
ATXN2	993.90010782124	0.0600304500254534	0.136358774230513	3.08492314195985	0.989555264105313	0.999999999607242
ATXN2L	2608.74920920386	0.0356242173964205	0.264435734509684	4.6259028312902	0.947923078479442	0.999999999607242
ATXN3	2075.43095866137	-0.0660015818525227	0.255241425133177	11.5106299160409	0.401527063285451	0.988918850412338
ATXN7	1241.03985286216	0.065774101648534	0.294244251291226	5.79577770929779	0.886636984667826	0.999999999607242
ATXN7L1	396.573889930353	0.0854988985030135	0.221790058949885	19.6528090795545	0.0503356459573221	0.331094988271105
ATXN7L2	137.577168898256	-0.423312811223598	0.32435431608432	22.2879370613111	0.0222350745479838	0.200092485244109
ATXN7L3	1573.19492213482	-0.0965606742473809	0.20420472561498	13.1773392710494	0.281892852082838	0.853090193034549
ATXN7L3B	4299.92276922645	0.0934352128466957	0.144413094554008	4.07410708644534	0.967698810305235	0.999999999607242
AUH	368.629829457847	0.0605325394086994	0.229063474174611	6.99713767243838	0.799315251046788	0.999999999607242
AUNIP	3.04767021771851	-0.061686702099444	1.84754769457702	21.2141174842174	0.0312193856426564	NA
AUP1	1876.35979702868	0.0508591550896954	0.202270491408016	7.0125490583381	0.79806634386267	0.999999999607242
AURKA	176.150829755287	-0.527226868633786	0.399943002405578	19.9764093929191	0.0456652505567973	0.312894888690084
AURKAIP1	772.866053637679	0.128687575118026	0.265452160327883	11.3433560740179	0.41496239438028	0.999999999607242
AURKB	265.014006609814	0.099695552414875	0.386538646548008	26.5780065377081	0.00531927525164927	0.077808835453315
AURKC	156.361799516497	-0.119195552104976	0.630253849574951	5.53694190493411	0.902408444335368	0.999999999607242
AUTS2	520.396781351359	0.0356531666123216	0.333348370295704	38.9174037320732	5.47130346831385e-05	0.00387027450258594
AVEN	618.179970113691	-0.0915009107293864	0.195608625368603	18.7764579955771	0.0652260935026642	0.383578321586366
AVIL	48.3568655845465	-0.482945631924162	0.595501761819734	19.7152706056811	0.049401801930929	0.327578953299822
AVL9	1275.65145633261	-0.102628941516564	0.23631967412451	9.81380475942217	0.547209372257504	0.999999999607242
AVPI1	854.396016768246	-0.0668445443174405	0.386283801058401	9.99159718170688	0.531143151053371	0.999999999607242
AVPR1A	108.669472872021	1.13777619809026	0.515727245879882	16.6886045677146	0.117429969112469	0.543174292536012
AVPR2	9.21612645437446	0.506609523073417	1.22936103236631	11.0114966976592	0.44230062156131	NA
AWAT1	398.641271848438	0.177266742307781	0.608679417352482	15.5111250133652	0.160272207994326	0.643026106457943
AXDND1	99.5567030614049	-0.127678194123003	0.906097030587871	14.963194690831	0.184188103348258	0.691857815841336
AXIN1	1106.57016215163	0.152901947666869	0.22373401744861	14.165154678131	0.223989158973507	0.761867852849348
AXIN2	1004.1399214938	0.176430953465227	0.261709428655341	16.7543717750564	0.115354086856334	0.536844515134487
AXL	2107.00640942789	0.116537504560325	0.343436491517419	19.9904533450861	0.0454717705354723	0.311940683403121
AZGP1	99.2357917067792	0.0989468903719266	0.846643373938192	3.91891579938851	0.97222910982206	0.999999999607242
AZI2	1140.74130195761	-0.0803598482360654	0.216166882946859	5.38477962622608	0.911110666216155	0.999999999607242
AZIN1	2822.81937109782	0.00753107111555285	0.237419574934895	10.3016082096583	0.503478760875546	0.999999999607242
AZIN2	29.9308865073247	0.639367926839065	0.663408795116067	8.39804305030862	0.677266097273978	0.999999999607242
AZU1	0.868177356709716	-0.0249207293413414	3.78294005389564	7.32305241177352	0.772351211596153	NA
B2M	12888.8959231159	-0.23834017967619	0.424732062947944	26.5870726345545	0.00530263125009398	0.0776939009988303
B3GALNT1	108.518637491497	0.361555161819079	0.566883169070009	13.262424028241	0.276520144410922	0.845330799244159
B3GALNT2	889.538070695104	0.0233862969971598	0.110920594349772	9.72470704002205	0.555306817426465	0.999999999607242
B3GALT2	70.3949302453983	0.690615839875494	0.634724813279627	29.3013381981635	0.00203787342014109	0.0420392681003936
B3GALT4	457.846423834704	0.0277032876872089	0.282701918077654	8.96599319900884	0.62503143386829	0.999999999607242
B3GALT6	158.903231448003	0.000839939361499467	0.315460010452344	14.6763770534715	0.197797035852532	0.719034717526265
B3GAT1	105.05828125235	-0.182735832723499	0.416379523525949	14.1878351998968	0.222773520209288	0.760772710609082
B3GAT2	10.8527341387479	0.262651642221313	0.998703973184648	6.18145979839159	0.860986345713865	NA
B3GAT3	718.730126857572	-0.0602295091949068	0.266677785117829	3.87535226236309	0.973422295615708	0.999999999607242
B3GLCT	525.066012203814	-0.385129344276947	0.304522227979966	25.3411798147586	0.00812365640724616	0.102947363868626
B3GNT2	1416.52932670371	-0.164984889517415	0.262558158514599	9.98144805464938	0.532056686364369	0.999999999607242
B3GNT3	72.8289265985495	-0.333143733709404	0.649368044552407	9.63253990409578	0.563711512225441	0.999999999607242
B3GNT4	5.82007439887963	1.06342237516242	1.48698275054262	11.8607978447877	0.374197110315092	NA
B3GNT5	361.147787337107	-0.215569103183182	0.279777303061784	10.3246528082715	0.501442485481042	0.999999999607242
B3GNT6	19.6938160991745	-0.410741693670966	0.994137539106779	7.45002612747123	0.761557037172023	0.999999999607242
B3GNT8	392.354076374723	-0.184148008069902	0.33419106933757	17.3468859593478	0.0980253316353343	0.48891980784685
B3GNT9	180.009986590099	-0.049302672615912	0.538004544100281	6.41589839936012	0.844224486191789	0.999999999607242
B3GNTL1	85.2217046508772	0.250093036207469	0.571938439780438	11.5617578209931	0.397468577648584	0.984170304102087
B4GALNT1	52.2488869425187	-0.314576396064261	0.876889508308803	8.686862627236	0.650771063634672	0.999999999607242
B4GALNT3	1840.46547461064	0.168059993385123	0.351500433627978	27.4393680459546	0.00394214336557869	0.0642506085834638
B4GALNT4	52.2185098570662	0.813307309086423	0.629550136234665	20.5060821294425	0.038864476599588	0.281536330103425
B4GALT1	1145.26184634493	-0.0889612551070876	0.312208197624976	7.39011521730231	0.766668767284059	0.999999999607242
B4GALT2	1500.82678846826	-0.145814094394804	0.190253659308389	18.6619064466263	0.0674390064418887	0.391259580230924
B4GALT3	594.503462933322	0.0721346169308359	0.198324724763032	13.0450081589636	0.29039388283636	0.865515181791672
B4GALT4	410.707723592238	0.109990826074137	0.195562119401637	17.6016555721773	0.0912958173924421	0.4699569961806
B4GALT5	501.972093704773	-0.139500947503129	0.343360379813946	13.0204414719951	0.291991464618304	0.867206525593419
B4GALT6	144.664330118146	-0.110741434836932	0.573956858353009	18.9450141753326	0.0620876910655566	0.372506953018852
B4GALT7	444.383680143624	-0.000512062277440851	0.219550629052007	7.15836014739136	0.786117959890568	0.999999999607242
B4GAT1	301.504648913983	0.0513502402503809	0.193422412016136	17.4650958478876	0.0948512028989325	0.478973599191216
B9D1	362.133862301109	0.107837773790188	0.325596492601877	11.9105086967794	0.37040749052685	0.954380660143812
B9D2	114.524935987642	0.123141196189479	0.382019934472528	8.27673674892117	0.688320596938743	0.999999999607242
BAALC	40.8592510774064	-0.0824324953978925	0.61705663777728	5.783246330309	0.887428007860239	0.999999999607242
BAAT	62.0005083467297	0.0088017842566892	0.769881709531705	3.64399544558364	0.979199204790587	0.999999999607242
BABAM1	950.866029125286	-0.0604360792996582	0.200768698109305	12.283510952126	0.342714339509221	0.923712612061665
BAC5	0.10655587708135	0.936897921285792	14.3166800257964	0.0660499862755657	0.999999999975885	NA
BACE1	652.241193515417	0.226165640637649	0.238904988433707	11.3893917976797	0.411241097663869	0.998455668262538
BACE2	467.743768311185	-0.311701308325623	0.390189460200888	7.77550044832378	0.733261887695831	0.999999999607242
BACH1	1817.19160534676	-0.0465362718260509	0.206112377465022	8.56747413366065	0.6617476343478	0.999999999607242
BACH2	617.255992066212	-0.0123884664015021	0.285587143614839	14.2448376956307	0.219740472927016	0.755639747775194
BAD	88.7011950553864	-0.432611105911792	0.440274706402236	9.99161404841743	0.531141633241893	0.999999999607242
BAG1	5394.10026698979	-0.0697020601698193	0.168145522594205	3.92890668424434	0.971950656613094	0.999999999607242
BAG2	730.852470541136	-0.0647510495038032	0.285789153419296	7.57293356660023	0.750971693469345	0.999999999607242
BAG3	1862.24768387324	-0.0346095390641436	0.168701501499485	20.6150255918019	0.037586028156205	0.277000361219512
BAG4	1283.87318654197	-0.0513179548474813	0.182089359712425	3.171793883845	0.988255037143761	0.999999999607242
BAG5	1473.87321282467	-0.00618518324809021	0.196852378960966	4.7497150894776	0.942679067766269	0.999999999607242
BAG6	4893.82096631045	0.0198056803261934	0.156905564451558	9.39969529623795	0.585050156856242	0.999999999607242
BAHCC1	583.312370148864	0.130467748363952	0.321244645168951	8.94666056267954	0.626815915158627	0.999999999607242
BAHD1	1544.85335710461	0.136809197133576	0.218507093214173	22.4824340473218	0.0208911093164179	0.191696197129916
BAIAP2	2439.46867890332	-0.00508486890674551	0.275988913045789	8.96076899710624	0.625513657051741	0.999999999607242
BAIAP2L1	1408.13139388076	0.056327326350037	0.218989939526847	4.25624803342873	0.961812727462751	0.999999999607242
BAIAP3	74.3537701586445	-0.0825922689326437	0.563390781714753	11.3134828204371	0.417386699639692	0.999999999607242
BAK1	439.526049565975	-0.262253620710318	0.264337344062561	7.4393603913735	0.76246943655555	0.999999999607242
BAMBI	3094.49622961628	0.192531571280208	0.377848816819312	42.1255082245243	1.54065986146961e-05	0.00180896525231058
BANF1	4327.42025425848	0.0939807874874464	0.223023302194213	7.48612947132506	0.758461106036544	0.999999999607242
BANK1	127.837727733439	0.643462481647674	0.648632654861131	20.0814910839612	0.044235537853098	0.306114804186117
BANP	419.660192262113	0.377455370147524	0.31510024908224	14.4556863112218	0.208795647931949	0.738967178855278
BAP1	1617.00417889513	0.152159082354299	0.184116181877753	12.9943359501857	0.293695770585731	0.869797886997258
BARD1	223.872009146758	0.228401919062492	0.405066829996879	4.88988204914301	0.936381890242	0.999999999607242
BARX2	3109.63975151345	-0.141897990567886	0.244963499580357	30.5033817763899	0.00132021990235393	0.0314719563762491
BASP1	240.384146414084	0.199014930079162	0.366598434226944	22.3077617355331	0.0220944853967525	0.19924285159245
BATF	30.4954440343671	-1.2449756776816	0.788138751130172	19.2401973505632	0.0569158247938898	0.355847589647351
BATF3	147.537643929755	0.380521942071977	0.667321019872942	11.4397783220047	0.407188658412645	0.993545371904047
BAX	497.243357359343	-0.170329178139655	0.259960885955747	12.3703153670781	0.336461059891599	0.916269784431839
BAZ1A	3092.05205475233	-0.140585342681236	0.21532316642099	36.883296087962	0.00012053636751147	0.00678935990664544
BAZ1B	2942.21147878572	-0.0111886053022497	0.169540707077469	3.17063163623732	0.988273136829648	0.999999999607242
BAZ2A	3085.55479137912	0.218500772501509	0.298713209781405	5.21824084344235	0.92013809882651	0.999999999607242
BAZ2B	2268.14789124206	-0.0298692649209713	0.235481836349604	5.19506946426111	0.921352420319945	0.999999999607242
BBC3	83.9371034145247	0.22181261396305	0.4576160615806	23.8791900293925	0.0132522581458959	0.141543301731537
BBIP1	727.685310406711	-0.0185867864502293	0.334399322065414	3.24764877877851	0.987031486515037	0.999999999607242
BBOF1	7.60654672708839	-0.498888277915168	1.19573403045933	9.34669883336045	0.589923797940459	NA
BBOX1	344.046141808082	0.14352755311119	0.452079456430651	16.8843804279285	0.111342413810014	0.525715941651958
BBS1	743.446295894391	-0.0488343528476168	0.261003815768511	8.65570903907644	0.653637981510636	0.999999999607242
BBS10	174.722522432252	-0.460518915298141	0.330360057700128	12.1123228686415	0.355259793322697	0.936927510562664
BBS12	271.394489884618	-0.0402573114861457	0.291892240699905	15.8723726725101	0.145935528215067	0.613754195173501
BBS2	621.36825140051	-0.172019013247654	0.224142231232415	9.51108319759453	0.574825452124847	0.999999999607242
BBS4	738.004941864643	-0.11405922303403	0.312859743595233	3.58277127142958	0.980574488988049	0.999999999607242
BBS5	219.214259801175	-0.15370781671986	0.40370508617331	8.04321139877425	0.709427857045894	0.999999999607242
BBS7	453.353035160598	-0.0241627311044995	0.351600737064037	5.02962549868573	0.929723375359351	0.999999999607242
BBS9	190.636206291588	0.13368931020158	0.280935137798935	16.2494795169107	0.132118840707181	0.582024295713614
BBX	1736.35875352762	0.0211897257146054	0.199925459504499	18.2400705472916	0.0761747025986629	0.42045902361782
BCAM	5392.50532428767	0.056647880165391	0.264946232640482	25.4660394823791	0.0077866535649441	0.100072703299282
BCAP29	798.673143225111	-0.0612230298377617	0.353654309961459	8.53652590245918	0.664588001266983	0.999999999607242
BCAP31	4113.58462778383	-0.0285044789560933	0.178951557687505	6.44156890234581	0.842338691161511	0.999999999607242
BCAR1	798.425639913548	-0.0222772978270166	0.298704389545631	4.12260039048715	0.966192341560719	0.999999999607242
BCAR3	222.197372293823	-0.0366265130752082	0.369820552636644	10.2972753829678	0.503861952305336	0.999999999607242
BCAS1	349.674783768806	-0.161689452466378	0.320056086834923	8.41706818164118	0.675527728642608	0.999999999607242
BCAS2	1097.60634386631	-0.269842322758248	0.219051569156848	11.8508805953543	0.374955866146431	0.960003799296547
BCAS3	494.210634767593	-0.303674216389696	0.262384292083411	10.130334377365	0.518703041190952	0.999999999607242
BCAS4	160.899503549853	0.220033320601321	0.375583773765774	8.16112282277857	0.698802101556503	0.999999999607242
BCAT1	11.096925460681	0.712343343596794	1.28940833351451	12.4720463543463	0.329226078186585	NA
BCAT2	655.260207697569	0.100707980710051	0.338746892940053	8.29675150446508	0.686500426136729	0.999999999607242
BCCIP	1045.18683120756	-0.00233729020804522	0.215975642363947	10.1549127076728	0.516508903637981	0.999999999607242
BCDIN3D	249.876291252745	-0.0828137011753998	0.227607709430325	12.0583136164153	0.359275976875703	0.941379691724437
BCHE	113.652810950203	0.258402295487168	0.519647758793837	30.3085103613523	0.00141705978158691	0.0328301366848189
BCKDHA	1110.94553691193	0.178831965916957	0.203379619000136	14.3249275908428	0.215532435565048	0.749240626051453
BCKDHB	839.670977624203	-0.0522027905992291	0.231567741459095	3.58411111941609	0.980545061669332	0.999999999607242
BCKDK	501.094450889344	-0.169758040841365	0.187496135105365	10.034419238972	0.527293797076754	0.999999999607242
BCL10	478.554676844391	-0.162052827714301	0.276509229879812	19.1745176872037	0.0580318996771878	0.359136101982166
BCL11A	554.982425461715	-0.339318167247284	0.257662631254357	13.0780538857318	0.288254485329136	0.862714135040902
BCL11B	1439.77313290503	-0.190675011621533	0.220465794246015	24.4358411915937	0.0110157671760885	0.12402618490495
BCL2	141.917882783329	0.121261183994748	0.497822166942085	4.76274081304166	0.942110004815306	0.999999999607242
BCL2A1	65.6045251994537	-0.757757095516738	0.767306314673931	12.0675285683456	0.358588785869451	0.941031974694559
BCL2L1	1886.19935089424	-0.193406889864002	0.206536848258305	8.06410703121389	0.707549954727229	0.999999999607242
BCL2L11	376.952951311703	-0.106387206456709	0.272382822817568	11.0722546511076	0.437230019832844	0.999999999607242
BCL2L12	276.000988709161	0.0244115869048021	0.252312086333885	15.1947984792936	0.173751537212232	0.672951174681475
BCL2L13	3668.90792916058	0.0926189779955886	0.212314825948293	11.4678137948322	0.404943235695943	0.992481108407291
BCL2L15	63.6018755805558	-0.926753061123028	0.649138399541258	13.7025319175655	0.249892772612588	0.806557845136584
BCL3	315.265728606006	0.00789849661740351	0.388558215107405	7.9990245555357	0.713391206116348	0.999999999607242
BCL6	3598.90169004194	-0.0703692888171334	0.272058602690454	22.1015635237409	0.0235981179785749	0.207987308221528
BCL6B	240.028735003303	0.07094972077698	0.352080892518934	17.3321431687709	0.0984275821254903	0.490008672479366
BCL7A	502.943919487582	0.354890052553008	0.227927579537612	26.6486154869266	0.00519095791269836	0.0769454637672832
BCL7B	402.073819332887	0.0255294390448995	0.208891273168177	9.1549202749901	0.607594934877574	0.999999999607242
BCL7C	1174.79255409479	0.124546858415372	0.29546901633305	5.64702879978029	0.895847511271385	0.999999999607242
BCL9	524.336076102472	0.0724404822610409	0.253809532447945	8.4755295444894	0.670178984013008	0.999999999607242
BCL9L	1849.24724704487	0.308706785899089	0.413961597493474	3.23153853314352	0.987298369399643	0.999999999607242
BCLAF1	3997.02903041018	-0.114835894030157	0.225277087973582	5.05130017694705	0.9286567178348	0.999999999607242
BCNT	1040.73840465964	-0.00168263112564249	0.20171352604298	9.49697420678729	0.576119008160583	0.999999999607242
BCO1	51.5595491347967	-0.0328609208898943	0.628007551704389	9.56231749194239	0.570132348415028	0.999999999607242
BCO2	1007.63311083967	-0.147370150427972	0.817090436027503	3.98060444386124	0.970480952568424	0.999999999607242
BCORL1	408.675505015381	0.14820081046311	0.368142437352785	4.396125228242	0.956866233409742	0.999999999607242
BCR	734.054366385371	0.147991755543231	0.354268296449389	15.5639639589568	0.158105903449413	0.639837724158703
BDH1	1175.62334455077	0.0607983184835291	0.238187527407155	24.5494281544192	0.0106055818929384	0.121468044772474
BDH2	806.386932491642	-0.166273282826765	0.29546653153711	6.75634979510346	0.818457585727834	0.999999999607242
BDKRB1	12.7315439759245	1.53895382073523	1.11852042872074	11.1186436494269	0.433377915872821	NA
BDKRB2	76.9571350222506	-0.486939058022979	0.507506781273312	19.074693382242	0.0597658467206974	0.364563168661867
BDNF	93.1662949442395	-0.555229653681285	0.350304001682607	13.451682375214	0.264830941617756	0.82972990603058
BDP1	2950.86555454146	0.0880355296857599	0.270521616544487	8.36589812338389	0.68020053797392	0.999999999607242
BEAN1	85.724643579722	0.0234564703894918	0.473644300006895	21.7383527254621	0.0264804384521688	0.222414169787814
BECN1	2083.63166088712	-0.0877029720121049	0.146201000023011	2.60510319547086	0.994983969126194	0.999999999607242
BEND2	2.95248073789601	-4.97652580806748	2.15150456425617	10.444842206642	0.490871946280964	NA
BEND3	298.689445186122	-0.0143463494401028	0.320894609557461	14.526385183876	0.205221676732423	0.733055906540072
BEND5	120.973449193746	-0.726224942115107	0.303784013482093	17.5667383999231	0.0921936800043791	0.472044769171042
BEND6	14.0242456331753	-0.492610566855004	0.928163419624366	15.8381908158872	0.147245092030753	0.617247995481163
BEND7	485.234409865806	0.147343175724176	0.275376952532809	5.62210302783194	0.897352273662151	0.999999999607242
BEST1	9.9948284410645	-0.783521866376426	0.981040874590804	14.5400351477573	0.204537150157668	NA
BEST3	1.19520596547093	-1.22913771058178	2.69521134006619	4.75524783858958	0.942437759088677	NA
BEST4	19.9850453907376	-0.240524690103542	0.842403544533532	7.51516670356284	0.755962878883861	0.999999999607242
BET1	912.135828265926	0.0409212403120886	0.210644157060232	5.01208518773274	0.930579920452506	0.999999999607242
BET1L	1301.4329024489	0.0820492597485084	0.199204114171883	8.36291179276554	0.680472975171254	0.999999999607242
BEX2	1245.88726168817	-0.0465575490704825	0.2553155029913	16.1070805624914	0.137201880420069	0.593375562630758
BEX3	698.849643697891	-0.0455333066374812	0.265364318739782	6.31362966673885	0.851639938611713	0.999999999607242
BEX4	76.6350650194865	0.381834265403522	0.671257856943092	8.89923709125026	0.631192782571644	0.999999999607242
BEX5	1399.48722280962	0.242226478297521	0.236857202045411	8.07950204274835	0.706164935589803	0.999999999607242
BFAR	1149.05545618427	0.120509598034007	0.15101863560239	21.5122859861679	0.0284358482116197	0.233382187414435
BFSP1	20.8096413535774	0.450764324847852	0.796580665223633	10.2780210660977	0.505566048710917	0.999999999607242
BFSP2	18.7115452405716	0.57326378461641	1.11884917997212	7.5682728685764	0.751375413945158	0.999999999607242
BGLAP	71.5282886051876	0.14171748781799	0.477870716354111	8.76052151072588	0.643986476609949	0.999999999607242
BGN	3660.37580408655	-0.000584743659429759	0.340578747338447	17.4085448498331	0.0963583875090253	0.48415031155838
BHLHA15	130.569365456872	1.30627138776394	1.01682385969945	5.65049262767718	0.895637515258598	0.999999999607242
BHLHB9	115.03745292936	-0.367742249427726	0.444122404590077	4.77721251549053	0.941473892578671	0.999999999607242
BHLHE22	598.114073706185	-0.148611264009865	0.52551065488954	29.9172326669287	0.00163270895837035	0.0361289187454772
BHLHE23	209.091260552852	0.118548171579717	0.48003356049796	29.2125267559513	0.00210378032570137	0.0429012826778758
BHLHE40	1562.31872733344	-0.00116167981491973	0.21002629212561	12.5969680948441	0.320481017232776	0.898570092358215
BHLHE41	632.161604094609	0.129025633283291	0.27181798451084	3.49698873842874	0.982397048674843	0.999999999607242
BHMG1	2.92275365160626	-3.56847005482837	2.45026349379426	7.42255094137471	0.763905325649661	NA
BICC1	760.213893597098	-0.320297155470163	0.339514350330273	14.5324243164325	0.204918603294643	0.732805442657201
BICD1	73.5649788268003	-0.759758907836303	0.506512494496004	9.26159791496741	0.597759544881007	0.999999999607242
BICD2	6655.84864578321	0.0291981108453901	0.135845216446163	5.64636420195393	0.895887778117424	0.999999999607242
BICDL1	195.078077677157	-0.361326455964968	0.2947874129125	12.254214433477	0.344841321330563	0.925079453864705
BICDL2	2142.39938642616	0.0480274741538723	0.274257430344692	28.9848639342084	0.0022822673555788	0.045226101673123
BID	775.700328638851	0.0834514981996533	0.26347627290326	4.87103662257971	0.937250808702683	0.999999999607242
BIK	13.2795298005168	0.633465086946085	1.0162025738821	15.9418877556806	0.14330202595145	NA
BIN1	704.727332439195	0.18814740768819	0.342999311325069	8.43323640320295	0.674049500182418	0.999999999607242
BIN2	160.787358047792	-0.171025839225534	0.575550550494395	18.4673126072092	0.0713517043108974	0.404957774842801
BIN3	574.78586506466	-0.00734765732576407	0.196674499441571	9.49739530587556	0.576080393512425	0.999999999607242
BIRC2	1785.63628392812	0.120894946028632	0.187865547201577	5.86303230755482	0.882344929706592	0.999999999607242
BIRC3	2500.79037462193	-0.128401816382783	0.300121684145273	16.8309129404727	0.112977591001564	0.530033492983692
BIRC5	547.065336787574	0.105315515308892	0.351396704605089	26.2518483077092	0.00595241141875503	0.0835840675833091
BIRC6	2952.00534643505	-0.0714374570323622	0.295756626560884	6.68676106592829	0.82385340960297	0.999999999607242
BIVM	807.243233236313	-0.269270441029348	0.180814423035577	10.4776223034823	0.488003921743798	0.999999999607242
BLCAP	1416.60873461016	0.108057447307401	0.170093533263793	10.9286044999184	0.449263853837757	0.999999999607242
BLK	52.3254816803642	-0.680183479539512	0.669297774854228	23.4180909011128	0.0154224660085663	0.156860202302802
BLM	239.334254997791	0.0355069635827501	0.322724197480988	27.9680635277829	0.0032740055764911	0.0572536334855485
BLMH	4634.93124983486	0.111588761235967	0.238467425657745	33.0216769613389	0.000521924099011108	0.017663548919474
BLNK	241.539269876683	-0.454885823366325	0.388552746672978	21.9817753262731	0.0245148134521319	0.211562840091898
BLOC1S1	1737.15859377637	0.0555774546075481	0.316196515946028	4.95668800383157	0.933245992232972	0.999999999607242
BLOC1S2	1084.53096229725	-0.0439353990625933	0.332513902281963	4.09447695937217	0.967071330050195	0.999999999607242
BLOC1S3	374.038553364495	0.231385569129413	0.244105812732784	5.5104238344494	0.903955822202286	0.999999999607242
BLOC1S4	403.264946553081	-0.208169938658155	0.234106578146318	7.76441529089004	0.734238852785374	0.999999999607242
BLOC1S5	549.217041386689	0.0153591799763091	0.181831785048391	7.80289172096002	0.730844179014631	0.999999999607242
BLOC1S6	1729.7052236953	0.0329453519592088	0.263267810053269	5.33975536974231	0.913602906044133	0.999999999607242
BLVRA	1725.22022719408	-0.130206615614772	0.179507215757635	16.9595274555021	0.109078469518308	0.518568299460634
BLVRB	733.556574947354	0.0394470656699805	0.338121300112807	7.24072410020199	0.779267528218339	0.999999999607242
BLZF1	1822.30792213696	0.0272728552629705	0.218908470265207	6.85555223512608	0.810657594057952	0.999999999607242
BMF	1118.3504505332	-0.069779428611249	0.259863569516277	3.23453333458667	0.98724904646487	0.999999999607242
BMI1	1305.38529012464	-0.1294576420114	0.289988286113523	8.13522081401265	0.701142170682503	0.999999999607242
BMP1	1369.89001996989	-0.24125653577399	0.238081081245509	22.0204347643678	0.0242154099531226	0.210169044691562
BMP2	713.177163376777	-0.0182739657016489	0.267284109882192	48.211142921983	1.30907526642191e-06	0.00029349546571829
BMP2K	2290.39911408908	-0.097649772620966	0.247939905391005	24.0982982759309	0.0123250885691074	0.134299891857824
BMP3	257.042965485963	0.512345003622822	0.685520169692069	9.93693728997869	0.536068485339129	0.999999999607242
BMP4	1507.12864791659	0.281509557768932	0.296343507454058	24.4111203678013	0.0111070070683553	0.124728003903587
BMP6	88.948346971729	-0.0890839113301938	0.407721179041318	18.929925110857	0.0623630316902674	0.373485748429568
BMP7	985.366569417505	-0.175684019285538	0.186175927506686	14.211067768308	0.221533508073901	0.758664355030861
BMP8A	409.612809197253	0.255221007333305	0.525810362839016	32.3759341667637	0.000663645199032396	0.0204544930987485
BMP8B	212.571811030903	0.448216956870138	0.677582115839532	21.0455442762214	0.0329022596668094	0.255237745911666
BMPER	84.0523767606465	-0.539002548866527	0.504631486942114	33.5905522283565	0.000421860085250665	0.0153938796436078
BMPR1A	3434.65200011763	-0.173780572336572	0.295535593782486	6.11866061177011	0.865330609262372	0.999999999607242
BMPR1B	223.581521396738	0.105098426516333	0.431206643512306	2.2532249101431	0.997390111276977	0.999999999607242
BMPR2	4860.2008789672	-0.0788472159594992	0.264065836463674	6.78751676036109	0.816020493779121	0.999999999607242
BMS1	2102.92503860075	-0.0636344925964406	0.151718467621487	19.9329013259844	0.046269409105333	0.315709480968972
BMT2	687.402806555326	0.0628622298977326	0.275026787753446	4.23973953798009	0.962371935444903	0.999999999607242
BMX	71.7986823074269	-0.210497930553446	0.50845282907266	13.5541018546458	0.258655525371884	0.82126460042655
BNC1	1776.49765838801	0.0645964770536738	0.278796536406007	28.4293075999612	0.0027812898718974	0.0516183475149991
BNC2	2658.15653056468	0.0525446567218801	0.315231978758347	31.8817353405955	0.000796774197991586	0.0230357163439444
BNIP1	462.922536230932	-0.0401542510405554	0.146046473476734	10.8667789642362	0.454490771878408	0.999999999607242
BNIP2	1079.72505584386	0.0425975793198755	0.219590768054469	8.53701510828023	0.664543121050814	0.999999999607242
BNIP3	1225.42072010521	-0.093253238209754	0.214405754711236	9.28833629329154	0.595296429072809	0.999999999607242
BNIP3L	7997.16387180679	-0.0607716973520965	0.320142793126426	1.58182553463735	0.999507614620062	0.999999999607242
BNIPL	1933.20565803393	0.041080021868925	0.220162742791622	7.70212435271389	0.739712469045421	0.999999999607242
BOC	2613.00735424476	0.269432813225481	0.238254140043815	12.3452772931496	0.338257250090665	0.918986327178478
BOD1	939.153011292353	-0.345838734516747	0.182645879278497	9.81754957518922	0.546869666673607	0.999999999607242
BOD1L1	1800.53666788173	0.092357029792576	0.280452789405334	1.88351683102485	0.998865275829966	0.999999999607242
BOK	742.749302998022	0.160375958399847	0.303526713075141	19.8224753169206	0.0478355286502711	0.321386229857407
BOLA1	603.27446787785	0.0335349141925685	0.279331382555032	9.21267735155061	0.602268405862324	0.999999999607242
BOLA2B	1712.31420521798	0.202600231651294	0.303396063175755	12.0173565994335	0.362339994020486	0.945711219838741
BOLA3	336.034552349546	-0.128336053560527	0.341870878899698	10.9891367676197	0.444173818170439	0.999999999607242
BOP1	617.924532135007	0.0723060572477744	0.231820040564898	17.9033404487574	0.0838507262878664	0.445998007928682
BORA	265.419056189365	-0.47291751489324	0.310628000733798	7.38589359411549	0.767027726480317	0.999999999607242
BORCS5	271.462400970264	-0.273877743411289	0.222205286850995	10.9005571391546	0.451631574659895	0.999999999607242
BORCS6	394.432022013052	-0.0592333138133456	0.221254028859589	5.93613961782034	0.87759101568128	0.999999999607242
BORCS7	651.535496057224	-0.0795807200232217	0.310039146648378	5.56198374078713	0.900935377072224	0.999999999607242
BORCS8	491.951853596687	-0.10978737896674	0.27188897342235	5.55556449795279	0.901314076965633	0.999999999607242
BPGM	978.511771682733	-0.18391875369738	0.185786472612464	22.4943729079798	0.0208111331851523	0.19116559807117
BPHL	797.545129164826	0.13376679661915	0.460264461651019	8.60438297006635	0.658357326458024	0.999999999607242
BPI	53.0651378519229	-1.42987554792582	1.32297157832752	11.0635446278808	0.437955168608572	0.999999999607242
BPIFA2	5.29539088508483	-0.0975939637136103	1.46225619577036	11.0049899704951	0.442845327685807	NA
BPIFB1	2.04548606754021	3.23496057478895	2.30058682015052	5.81686993996294	0.885299377015422	NA
BPIFB2	43.4238803354995	3.27463168531019	3.10516061657468	14.1452127414101	0.225062175413531	0.763627510838912
BPIFB6	26.1117074940229	0.450986078352384	1.24695835873311	9.79762971935361	0.548677271039819	0.999999999607242
BPIFC	729.067204678024	-0.293078574998592	0.366688452708042	5.84060043097918	0.883785205460568	0.999999999607242
BPNT1	1032.06013410698	-0.0376637617386744	0.217439879282751	3.37557462776533	0.984774112788072	0.999999999607242
BPTF	2445.17133581015	-0.0329221640738126	0.239045607001241	7.3976195657682	0.766030274885083	0.999999999607242
BRAF	6098.55893351773	-0.0127960844953457	0.398171780377598	17.4616406789794	0.0949426987433242	0.479252444346302
BRAP	1225.48406390739	-0.126128226014512	0.164701883569661	28.1165355781462	0.00310688882102981	0.0553976250526596
BRAT1	718.590499972157	-0.0567566705675876	0.304798140942165	8.3504855801408	0.681606260179125	0.999999999607242
BRCA1	278.074640675171	0.0442088644449328	0.427033517952326	17.2540065219201	0.100583435508368	0.495617809452971
BRCA2	722.929709271409	-0.138556910852361	0.252439182001347	4.1105623702374	0.966570387378826	0.999999999607242
BRCC3	926.85522180254	-0.0846978138898996	0.24076734409849	4.31672491640927	0.9597199198684	0.999999999607242
BRD1	1341.63612484144	0.00980700517113486	0.173984881866886	16.2452815341466	0.13226640121782	0.582178586054348
BRD2	5843.90724422028	-0.0158443858083818	0.143273676107089	7.50650292085788	0.756709027957721	0.999999999607242
BRD3	1376.1406887605	-0.020137357533688	0.172771095664538	6.37794364453737	0.846994859915692	0.999999999607242
BRD4	1925.53443275417	-0.104305456190503	0.176348089171005	7.41412567705709	0.764624062419445	0.999999999607242
BRD7	2193.90734364365	-0.0994916111340389	0.133620610668711	7.05017772110057	0.795005564692124	0.999999999607242
BRD8	2289.13037048414	0.057268648951457	0.139077050560229	2.97008922002067	0.991115288895003	0.999999999607242
BRD9	1038.68881096669	0.0376916975527368	0.25904037246202	2.68902775288586	0.994230427774151	0.999999999607242
BRE	721.245082358929	-0.192476271615869	0.232866927739851	5.78820308604838	0.887115449199288	0.999999999607242
BRF1	1030.12574502091	-0.0964791569247359	0.329678654291799	8.97450689535049	0.624245561962745	0.999999999607242
BRF2	198.103317985881	-0.114479314885197	0.248452027692062	5.17537907556232	0.922376253337401	0.999999999607242
BRI3	1030.56864825754	-0.0546756324073484	0.251932234029824	9.2932217074142	0.59484649676874	0.999999999607242
BRI3BP	1175.8381790451	0.000170665434759604	0.198182751508024	19.3340512554878	0.0553544835166689	0.34894754766169
BRICD5	6.90357927336316	-0.984578259115978	1.22253661893193	4.58317900303734	0.949663378360899	NA
BRIP1	271.560813277515	-0.0290439399427674	0.321324589338342	15.5707488855769	0.157829475566207	0.638868843403548
BRIX1	1009.71453362002	-0.15802478092478	0.337351073347067	5.77246598754152	0.888106297915253	0.999999999607242
BRK1	2070.52114713865	-0.0494877631082482	0.218480484436568	6.79701170776741	0.815275564845217	0.999999999607242
BRMS1	876.98025978675	0.157312711696585	0.197920490444017	14.2449875828473	0.21973253936117	0.755639747775194
BRMS1L	550.152810387862	-0.0992220150997408	0.251373144031105	9.90026755971735	0.539379910407336	0.999999999607242
BROX	2506.9523227179	-0.0409221822585075	0.247657375266415	5.3448658885186	0.913321938388805	0.999999999607242
BRPF1	892.986611947781	0.000258554272168503	0.178366996119376	8.38776685077448	0.678204566171709	0.999999999607242
BRPF3	849.52106893071	0.208236985671308	0.247060541013351	8.98680137956399	0.623110681758217	0.999999999607242
BRSK1	34.113332407944	-0.318643029506878	0.591219931122821	12.3023270460465	0.341352638373826	0.92269261971695
BRWD1	1870.14829811405	0.0651970731371476	0.325635277204567	7.51282423159887	0.756164682269089	0.999999999607242
BRWD3	1246.58287492453	-0.163543991109888	0.282302890058774	7.31147245892976	0.773328067191366	0.999999999607242
BSCL2	708.88142172594	-0.0132675962980153	0.239398598142033	7.39222597348976	0.766489230459769	0.999999999607242
BSDC1	1361.69762948163	0.187612841423547	0.17785085902736	5.77711825102426	0.88781383152795	0.999999999607242
BSG	9396.62234562788	0.0203262174841864	0.207125812634112	4.61560885785343	0.948345635713398	0.999999999607242
BSN	15.1801221670581	1.32068051672245	0.902853493699747	9.09259279390517	0.613345851512047	0.999999999607242
BSND	11.4216368610124	0.552965408339976	1.23518216907405	5.36852842325987	0.912014612024433	NA
BSPRY	292.832239381883	0.204020632149455	0.258994897446494	15.139316096969	0.176207410183947	0.678634180228129
BST1	409.270457575016	0.123693512871597	0.375723701543616	21.8964243928755	0.0251880479800864	0.215433948531363
BST2	74.5064781909297	-0.809330330309014	0.899039368591465	14.8635211990722	0.188830650417528	0.70145916509259
BTAF1	2334.49236087751	-0.0682619554417209	0.283507423292978	8.97312865597428	0.62437278353163	0.999999999607242
BTBD1	1569.75469136493	-0.0363892523358032	0.198696559318925	3.78858084133037	0.975698293720081	0.999999999607242
BTBD10	464.377673040459	-0.0432479974034197	0.254992663374943	5.95666951595831	0.876239676780873	0.999999999607242
BTBD11	389.826554730421	-0.082761383480459	0.217515970937668	3.89478018531599	0.972894376899661	0.999999999607242
BTBD19	173.626362457037	-0.322737738266136	0.324711979722562	13.4746255875459	0.263438405642679	0.828590871620332
BTBD2	1973.50771573919	0.0449008181192109	0.185493932055466	11.0895099755119	0.435795182212537	0.999999999607242
BTBD3	3145.31289124113	0.0789293276765481	0.240076199477993	16.5027425927753	0.123468948891888	0.558603947018082
BTBD6	1035.85265908988	0.0135489136312122	0.190580852725073	7.49731910429648	0.757499261864074	0.999999999607242
BTBD7	1426.42882300384	-0.101429713694763	0.232176125620969	7.91411092000772	0.720976391292509	0.999999999607242
BTBD9	976.276172459984	0.160968994269448	0.194606217181918	17.1352841556077	0.10393711154865	0.505673135998803
BTC	1174.99192141806	-0.267388997062131	0.348840837411502	15.6125981914103	0.156133202553723	0.635729907071774
BTD	240.955229428346	-0.0622072587512511	0.278935501222711	5.45502189229558	0.907146815024473	0.999999999607242
BTF3	9896.07006590118	0.025224389689936	0.256636470714978	5.42004486267274	0.909132103077466	0.999999999607242
BTF3L4	1769.32155314017	-0.0202330635648905	0.191295217475118	6.05121865101228	0.869925006533275	0.999999999607242
BTG1	1784.97868908968	-0.127371717421475	0.197063716743029	11.9159515765404	0.369993953096059	0.953972737343793
BTG2	1513.67393082206	-0.0488175974016969	0.157451769483002	31.900127885655	0.00079138411484833	0.022956789617281
BTG3	1042.68636519628	-0.192581126217386	0.273839932895668	9.32809407850289	0.591635893910207	0.999999999607242
BTK	204.00217886626	0.190884414249448	0.597374865179307	19.9851738010561	0.0455444179129741	0.312314919816422
BTNL9	202.075516338378	0.204632700807248	0.638305258821675	2.64629094063662	0.994623631694521	0.999999999607242
BTRC	948.04394214231	0.0808994933929525	0.167374974085894	4.32941449045609	0.959271950967801	0.999999999607242
BUB1	451.534665720686	-0.139226351715855	0.3329030182721	32.9434923969304	0.000537370142972084	0.0179748229994151
BUB1B	694.155750692013	-0.017115817442816	0.317773116622213	22.6191692994873	0.0199920861774956	0.187112221742152
BUB3	2103.3320786853	-0.0509350575234765	0.161033987459641	15.9732012408198	0.142128694473289	0.603924487102159
BUD13	380.656687800372	0.105608507838167	0.172220056868782	13.5821408326443	0.256983283424986	0.818099930178486
BUD31	2247.93887302276	0.0489656644179907	0.196026032160156	24.2407211832995	0.0117556401978961	0.129815962773952
BVES	5.90732980694124	-4.44014917601857	1.68483547167725	17.4333207555165	0.0956955270508542	NA
BYSL	753.031580765458	0.105253097095549	0.237720948977727	26.5754380495654	0.00532399969121466	0.077808835453315
BZW1	13021.8938696047	-0.0443125750511801	0.290615821259656	8.52227152435353	0.665895447334205	0.999999999607242
BZW2	2133.89006185541	0.135614276385291	0.229197742026444	22.6004088344339	0.0201132584804142	0.187549887289005
C10H14orf1	251.933503396138	-0.0457809398874359	0.276354006558892	9.56438525527437	0.569943083887176	0.999999999607242
C10H14orf119	714.158103149821	-0.0268616137385879	0.223569572271326	5.11078238083599	0.925682883096802	0.999999999607242
C10H14orf166	3248.82384261389	-0.000496766439101037	0.270914716253405	4.70829866266081	0.944466480830254	0.999999999607242
C10H14orf169	410.44084299176	-0.0136457296651229	0.192098610257737	27.5161002810381	0.00383763104671437	0.0631467971959842
C10H14orf37	514.530489084852	0.00347463324173238	0.294404554789244	29.8903151432985	0.00164865892947177	0.0363420857250098
C10H14orf93	273.924710500031	-0.211301493827232	0.265567771200342	7.33011795910681	0.771754542615522	0.999999999607242
C10H15orf41	196.35906382106	0.0557240190519197	0.28539396870828	4.22168323639926	0.962977667337754	0.999999999607242
C10H15orf52	920.636324009109	-0.0851291326819982	0.331080203994946	2.33430105113234	0.996934171092145	0.999999999607242
C10H15orf57	872.814504778721	-0.0323398129246005	0.227554213644073	6.61436589590414	0.829398295882431	0.999999999607242
C10H15orf59	57.5009281062805	0.529687893959411	0.71108674621271	3.15289163474927	0.988547008713355	0.999999999607242
C10H15orf61	68.2607544080749	0.434539678978805	0.37652569734387	9.80297785009702	0.548191815744151	0.999999999607242
C10H15orf62	835.540123128956	0.0648003913583326	0.311048263742074	40.0650791426515	3.48697359743481e-05	0.00285345880667804
C10H15orf65	12.7163633191135	-0.273219929821064	1.10049525597827	5.54479797246205	0.901947551886496	NA
C11H2orf15	0.0418043744920774	-0.986291013520169	14.3166800270313	0.0723375066999026	0.999999999960342	NA
C11H2orf40	176.994148116969	0.502459001660098	0.716129498352753	6.19923173281313	0.859745513206336	0.999999999607242
C11H2orf42	649.609793077616	0.0251649838089152	0.272694236840657	3.94384764654399	0.971530879214733	0.999999999607242
C11H2orf49	731.641261373871	0.233689564137477	0.161738449938778	10.3706779088189	0.497384642287562	0.999999999607242
C11H2orf50	2.06514108715859	-0.705997159133683	2.38801500609873	11.3682186868209	0.412950410525703	NA
C11H2orf68	1888.52129248208	0.000678901628185858	0.11910319004946	25.110342590204	0.00878354683070989	0.107368284913635
C11H2orf70	0.0841236202811248	-0.0251660056913438	14.3166800277794	0.161975877473559	0.999999996783705	NA
C11H2orf71	0.737769520061086	-0.255302214801755	4.20466334587659	3.70305893271035	0.977812487789793	NA
C11H2orf73	3.67513297158738	-0.761535081543292	1.52629815457223	16.0377694317568	0.139734485808221	NA
C11H2orf81	6.50993793324374	1.93282053789786	1.27347553813683	12.756149654567	0.309561731509192	NA
C11H2orf91	0.320823774040552	0.246298179008863	7.15619034417321	0.738635180118166	0.999989375995937	NA
C11H9orf116	387.189112746715	0.0754654416051948	0.34099355772102	8.09651806780039	0.7046326682919	0.999999999607242
C11H9orf142	2945.08940771521	0.120107803858517	0.308981198189148	9.07432854930335	0.615031481506705	0.999999999607242
C11H9orf16	2116.6875509652	-0.0653562719061763	0.290256704036934	8.86604225094152	0.634255777026799	0.999999999607242
C11H9orf69	640.876999019025	0.00894159438206864	0.236956746502233	18.1770966016312	0.0775612726934589	0.42468989974656
C11H9orf78	1503.02156438857	-0.0451069383269001	0.194655626403752	12.2104420374729	0.348034718091536	0.927360878288624
C13H10orf113	1.49288456874413	2.03507233675638	2.66935643029743	13.139887994577	0.28428084931687	NA
C13H20orf144	2.07322051603528	4.69026616447812	2.34998090770995	15.2046170370151	0.173319809465528	NA
C13H20orf173	0.124887538285535	-0.0246195665910994	14.3166800255986	0.14714025175811	0.999999998091801	NA
C13H20orf194	832.909566323733	-0.0704642789989238	0.213370705512824	10.7568005447899	0.463857063820068	0.999999999607242
C13H20orf196	155.154125712355	-0.0578392073993437	0.304157573795195	9.57168951622884	0.5692746099833	0.999999999607242
C13H20orf27	641.593560187818	0.0545814703476302	0.260840829231416	7.39839966497834	0.765963871880645	0.999999999607242
C13H20orf96	29.461235086248	-0.278002693511466	0.703362373096242	5.75193147095263	0.889392661681485	0.999999999607242
C14H8orf22	14.0152978224641	0.60893540691628	0.998320355477607	6.68177718951432	0.824237397525609	0.999999999607242
C14H8orf33	526.109401208421	-0.0324755333151882	0.188786754573493	13.6008618178306	0.255871158912117	0.816479238828458
C14H8orf37	313.12362299035	-0.254145362860027	0.315432423570214	7.41644952437878	0.764425885717284	0.999999999607242
C14H8orf59	1679.80665018184	0.280549308669544	0.336722387880377	8.97225806514109	0.624453145294812	0.999999999607242
C14H8orf82	203.198399468264	-0.0875005526833529	0.259443053793216	13.1005105458728	0.28680690347808	0.860022090693479
C14H8orf89	36.6608930954057	0.310805253555876	0.568141390929803	4.75098644633874	0.942623670833087	0.999999999607242
C15H11orf1	9.61325774700585	-0.257226471587894	1.08937781389981	7.79372226341832	0.731654099577928	NA
C15H11orf16	18.7039381132066	0.33161612396851	1.71569672849088	15.0898318458372	0.178421217204867	0.682373190550852
C15H11orf31	2026.94080078458	0.125818969062216	0.355436214802434	6.98755996375553	0.800090023894145	0.999999999607242
C15H11orf42	528.414764201232	0.089515004819692	0.353916303325186	6.14816020677199	0.863297787713477	0.999999999607242
C15H11orf49	319.821002921761	-0.131282724489167	0.284954234748487	9.15608334566616	0.607487644174222	0.999999999607242
C15H11orf52	109.273835759528	-0.0981549005947296	0.723125051104241	18.6194760843878	0.0682754971799157	0.394257303889376
C15H11orf57	1102.93737130523	0.0689454998495992	0.18253295944534	4.63960751811499	0.947357315552958	0.999999999607242
C15H11orf58	3335.68091663294	-0.0842302388554681	0.222293355598306	4.22962327689766	0.96271206342792	0.999999999607242
C15H11orf63	0.0666659493758011	-0.0248209900121978	14.3166800277794	0.136445163982778	0.999999998734295	NA
C15H11orf65	16.8351518006399	-0.183698496932938	0.989180999729302	4.61439688764449	0.948395250251467	0.999999999607242
C15H11orf70	22.8709517233355	0.209481325383556	0.698309939774288	9.91353496413285	0.538181161938138	0.999999999607242
C15H11orf71	193.264624089549	-0.041569579792809	0.335108908194295	4.56054061967973	0.950571146998169	0.999999999607242
C15H11orf74	791.809662264154	0.0146657991011809	0.29228533052537	4.65489812146131	0.946721767860133	0.999999999607242
C15H11orf91	0.166091246409537	-0.0266585953548445	14.31668002551	0.407055514792006	0.999999539132482	NA
C15H11orf94	1.05893721707036	-0.456588385213208	3.60837097592007	3.82943950405397	0.97464316459974	NA
C15H11orf96	697.617755588493	0.218296090414301	0.394626340533447	10.4793663598853	0.487851513794194	0.999999999607242
C16H1orf105	24.6683629942719	-0.932303531517916	0.966249283694761	4.07461896865925	0.967683136286653	0.999999999607242
C16H1orf106	878.875947246749	-0.0733137650674555	0.253247892257102	22.1063726483718	0.0235619899103516	0.207987308221528
C16H1orf112	251.931810627572	-0.447335391084567	0.318368228777723	9.09499628496133	0.613124041325098	0.999999999607242
C16H1orf115	1124.00192900469	0.0677909306689633	0.229483233410353	21.9359547118481	0.0248741320256065	0.213915056682595
C16H1orf116	1995.10277088234	0.0415883140650085	0.194386184518552	10.463257312788	0.489259947414912	0.999999999607242
C16H1orf127	0.0558025874817365	-0.0250175522917357	14.3166800273954	0.0338822410748634	0.999999999999378	NA
C16H1orf158	24.5583117229474	0.189621063968757	1.05021991140687	8.90222125953801	0.630917392729562	0.999999999607242
C16H1orf159	318.386244950963	0.360987802042007	0.293188999080238	5.24795954687306	0.918565673553456	0.999999999607242
C16H1orf167	0.0596624847089607	-0.0249688437543877	14.3166800277794	0.0706912773211101	0.999999999965034	NA
C16H1orf174	533.333081393236	-0.056970807017849	0.208194470961927	5.26934218945405	0.917423920112803	0.999999999607242
C16H1orf186	149.390177519842	0.380125797178264	0.643130666467512	33.958107161164	0.000367440219069387	0.0142197717065866
C16H1orf21	1220.37631785197	-0.049703640550438	0.211428393098866	16.0919231392642	0.13775243113303	0.593986256117105
C16H1orf27	949.725520699018	0.0663103185569349	0.309438328336127	10.0063182192877	0.529818910983062	0.999999999607242
C16H1orf53	197.902246293925	-0.177631180892966	0.314201147941544	12.722958267562	0.311817728643407	0.889141582089081
C16H1orf74	110.00803839504	0.214284406342774	0.303694461228598	8.15978461328393	0.69892307686254	0.999999999607242
C17H12orf43	328.380860485253	-0.0575229813176739	0.221835480131991	15.7705329197559	0.14986581949862	0.622697170088153
C17H12orf49	854.176282635435	-0.0246457480603717	0.190003593058118	6.83671994436781	0.812147868534063	0.999999999607242
C17H12orf65	219.549145241203	-0.101042901633087	0.328078654303346	6.19428229300638	0.860091584588888	0.999999999607242
C17H22orf15	84.2265648590227	0.142710896116511	0.710298991583706	4.90971266908821	0.935460086387833	0.999999999607242
C17H22orf31	25.7651808065048	-0.241887303360568	0.571056118336209	14.8452407085576	0.189692088134024	0.703197044929823
C17H4orf33	183.416816233848	-0.0506197143758622	0.403272051942601	5.00946137426479	0.930707537004661	0.999999999607242
C17H4orf45	1.7192389992251	-3.32190402827126	2.14638014951218	25.5117341473099	0.007666680181058	NA
C17H4orf46	383.046971731629	-0.0596260547503057	0.364462068547258	3.6424695133411	0.979234246607567	0.999999999607242
C17H5orf52	12.2203007925102	-0.0490153895156644	0.96669010596959	10.8876989432175	0.452718987603451	NA
C18H16orf46	71.7492371822717	0.0755514821538068	0.398093014817726	7.79247264985406	0.731764431163127	0.999999999607242
C18H16orf70	765.283985016422	0.180661063928093	0.214149479391216	16.0959870391955	0.137604640856655	0.593986256117105
C18H16orf74	186.267316395631	-0.0580806709644733	0.388727155281845	6.25419982191249	0.855876174012223	0.999999999607242
C18H16orf86	0.981200371369364	-3.71616957285319	3.5476367820352	8.84545636534668	0.636154929162731	NA
C18H16orf87	307.589599469253	-0.215226166908264	0.323787664691904	7.45969078993846	0.760729399608614	0.999999999607242
C18H19orf12	587.623363801993	0.121461462413346	0.169266547011144	7.414062043895	0.76462948833581	0.999999999607242
C18H19orf18	62.5037131490243	0.00434064273207042	0.527331185065445	15.3527337909298	0.166911329817086	0.659170917278246
C18H19orf47	152.022811658225	0.616290948101589	0.361952106430919	15.9069211138659	0.144621730591224	0.610161591299078
C18H19orf48	383.865011237328	0.147769080306911	0.321902764547237	22.6589186200611	0.0197375990913059	0.18576688312224
C18H19orf54	135.59060521595	-0.365345133583858	0.373357117790656	8.40972047924322	0.676199242514534	0.999999999607242
C18H19orf68	165.921590698603	0.376329088253389	0.517320474415791	4.05408231364925	0.968308174298436	0.999999999607242
C18H19orf84	0.210973355697728	-0.0249604102076825	14.2273296567942	0.131612263591677	0.99999999895989	NA
C19H17orf100	7.92954959416464	-0.78957030455511	1.32446159549901	12.0978922355338	0.356330158122244	NA
C19H17orf49	531.151662314791	0.166214846677432	0.216816165942517	11.4985471762133	0.402489503744276	0.989187416499384
C19H17orf50	7.94206678948932	0.156523149817371	1.32162912768893	8.33618122233833	0.682910155578571	NA
C19H17orf58	266.736089601885	-0.460082072405533	0.355895795499783	7.88192715136586	0.723839993206223	0.999999999607242
C19H17orf62	1015.84718096491	0.0347076390323232	0.274062221440685	2.64302223588652	0.994652889113669	0.999999999607242
C19H17orf67	171.490071708648	0.438949272967437	0.558544377490763	24.2994621557262	0.0115280974373037	0.127967267251925
C19H17orf75	646.841196457879	0.0631356358167596	0.203781256539836	8.66423182363894	0.652853839278071	0.999999999607242
C19H17orf78	2.4978957569142	0.113691261238627	1.86121778360338	19.1797095423218	0.0579429656159606	NA
C19H17orf80	429.607687462832	0.0950255431159886	0.229696205249166	6.38105584776429	0.846768502234863	0.999999999607242
C19H17orf96	47.4788617647727	-0.419466052086825	0.633797558121289	9.44147563507602	0.581211802998229	0.999999999607242
C1D	1536.77928920615	0.169804358430706	0.325296743968167	8.50423464259779	0.667549083210196	0.999999999607242
C1GALT1	776.06692371444	-0.126262452385138	0.301776680048366	19.3375278124711	0.0552973957741536	0.348715035097512
C1GALT1C1	585.435464432639	-0.245656534922594	0.27285203438045	5.38564683679465	0.911062290022701	0.999999999607242
C1GALT1C1L	0.0565583020044027	-0.0247224090437227	14.3166800277794	0.0596566488599208	0.999999999986187	NA
C1H21orf140	0.282795387278299	-0.986903738008242	11.8954614604707	0.651353634794887	0.999994481317442	NA
C1H21orf2	625.655332289777	0.0944517424591392	0.303180679809261	8.5160867663277	0.666462566807777	0.999999999607242
C1H21orf33	1114.48581914712	-0.0752916121941753	0.183884716774273	15.3932408150592	0.165192552013835	0.654874918127501
C1H21orf58	1.61219496958048	4.59568856388093	2.57347302647295	7.13965450978901	0.787663815568259	NA
C1H21orf59	870.101309874697	0.0973289139268005	0.170403768976564	8.92604352451553	0.628718837741635	0.999999999607242
C1H21orf62	23.7682688955358	-0.619891494190117	0.804147684809559	16.9228328299657	0.110178988708026	0.521563537612914
C1H21orf91	3724.56525701154	-0.117555833625349	0.284470826240168	4.71611817879034	0.944131573005719	0.999999999607242
C1H3orf30	0.319135109311896	-1.94772367879368	9.43113336852773	1.21842942916518	0.999863670559628	NA
C1H3orf33	168.297426845188	-0.0715572909962476	0.468704843643096	3.87863532180916	0.973333558256385	0.999999999607242
C1H3orf38	524.943301493319	-0.412294406749883	0.264886944042661	7.90550448327122	0.721742790934323	0.999999999607242
C1H3orf52	751.31968626498	0.181424903911339	0.241153013454801	16.1231499927118	0.136620210726698	0.591735216347004
C1H3orf58	3008.57312744668	-0.0858180007995069	0.252713009974342	7.11337420326777	0.78982928522062	0.999999999607242
C1H3orf70	286.549037646514	-0.198216298586018	0.319800945172402	14.6528643717346	0.198946822910401	0.720731155291057
C1QA	671.001810812473	-0.247634212669615	0.833751196496558	13.1258487735266	0.285179670486401	0.85782551879219
C1QB	474.405702788416	-0.375973686640203	0.843320597118985	11.8622238576071	0.374088082482485	0.958687498685626
C1QBP	1222.88777898868	0.0409429810094957	0.202296946330879	26.6194509552187	0.00524359528992442	0.0772881765192958
C1QC	628.568100999904	0.0614210080106879	0.844091193484828	11.4630166576532	0.405326970461279	0.992635091377358
C1QL3	33.8099877730834	-0.390716269473757	0.738715224864715	8.74995681610233	0.644960041990456	0.999999999607242
C1QTNF1	973.182358948705	-0.103221664075886	0.446573769567961	19.5988158925303	0.0511557214624312	0.333455221624804
C1QTNF2	150.445340856828	0.144350851125133	0.590985440231119	19.273584009723	0.056355926081895	0.353740762017312
C1QTNF3	512.469424563829	0.13576323535534	0.626675805705127	7.52387898242603	0.755211908925389	0.999999999607242
C1QTNF4	14.0036284208776	-0.261216034873665	0.91601755987774	18.8913150232514	0.0630725564361783	0.375519946218847
C1QTNF5	312.550540841588	-0.499581620379781	0.602642569878016	5.26421341368541	0.917698569204775	0.999999999607242
C1QTNF6	571.503368805182	-0.576486735389963	1.1297410552227	34.0827550701533	0.000350590735902499	0.0139428481605464
C1QTNF7	437.278706108506	0.244394000726778	0.35977876399683	41.4211680450256	2.03919895945781e-05	0.00207717078346068
C1QTNF9	46.6736226565854	0.577885892412557	0.613771275588984	7.45712608572103	0.760949109926364	0.999999999607242
C1R	3032.65424701792	-0.277440992967032	0.484407783931047	17.8407422738853	0.0853502818081292	0.45102120054357
C1S	4113.10673769227	-0.157819214082366	0.490834591417123	14.3836346972014	0.212487390603732	0.743900137471857
C2	95.1618713278395	-1.09771597975103	0.856362019949199	18.4642712888569	0.0714144234511856	0.404957774842801
C20H5orf22	584.562462344095	0.0288478878543178	0.217635969363887	4.85113819157823	0.938160775910834	0.999999999607242
C20H5orf34	198.579069240405	-0.159915729827302	0.272586577974873	3.8329303479286	0.974551652926066	0.999999999607242
C20H5orf38	365.276404511954	0.186973073733403	0.356762223603319	9.07033065119379	0.615400470414278	0.999999999607242
C20H5orf42	629.944177357571	-0.0122473614154676	0.25527843658875	6.08530350716092	0.867612295414388	0.999999999607242
C20H5orf47	0.677010167875214	5.08200626520255	6.02875824041592	3.23798520408064	0.987192032293701	NA
C20H5orf49	4.21665542604182	-1.13151728272098	1.67999651761172	8.03185454847778	0.710447528706134	NA
C20H5orf51	2356.2722248283	-0.0154462879988299	0.199690836551049	8.32799769762266	0.683655781504896	0.999999999607242
C21H14orf132	103.187043272855	0.000376528331038183	0.792991045764057	1.71988241408451	0.999263336532086	0.999999999607242
C21H14orf28	235.701196876505	0.0328906005736255	0.284331224255812	12.809877198838	0.305933220380428	0.88301856643596
C21H14orf79	122.869283900519	0.230040280471467	0.446816546854737	3.80601684153942	0.97525162091007	0.999999999607242
C21H15orf39	419.959012064247	0.025664539119947	0.349416922165005	8.0598665362852	0.707931236431085	0.999999999607242
C21H15orf40	572.419529905012	-0.0074038159186279	0.260864826084272	5.09560235848357	0.926448294876238	0.999999999607242
C22H3orf14	24.9837836581743	0.106760472690889	0.683722599112558	9.4653173590375	0.579023125036903	0.999999999607242
C22H3orf18	72.1534864414708	0.286902650846517	0.452663725869474	3.3393355760835	0.985438844234858	0.999999999607242
C22H3orf20	6.89607343099087	-1.21615019873723	1.28854089542917	6.69722965571714	0.82304576869053	NA
C22H3orf22	5.08822800928051	0.252367463560904	1.68331717319188	4.7989907926621	0.940508922560719	NA
C22H3orf62	244.912388667656	-0.326934511184221	0.307620508831054	8.57378130751829	0.661168496838687	0.999999999607242
C22H3orf67	88.7047373387659	0.661882811451627	0.421135266698168	16.3511812905084	0.128585991834181	0.573297176161866
C22H3orf84	1.32221222160321	-1.26736877761373	2.98698829947161	12.0135983597105	0.362621942398506	NA
C23H6orf106	2778.21128673586	0.0791714574975231	0.177302728183051	21.8538555434088	0.0255302047947145	0.217288577836445
C23H6orf132	4143.63632855106	0.150935330019963	0.308785414959532	15.4366980026739	0.163364600665494	0.651167667259799
C23H6orf136	260.249635744543	-0.357889901268853	0.310964575779412	9.98424877346531	0.531804544526025	0.999999999607242
C23H6orf141	180.693657073736	0.240206704525064	0.338229843993807	11.8962304114251	0.371493628560864	0.955731672084026
C23H6orf15	67.319643637176	-0.154281512406217	0.623800416040315	13.5641709694349	0.258054096005953	0.820227041791391
C23H6orf201	10.0220170881419	-0.0265261439046253	1.11721983638603	5.5340011381241	0.902580679673951	NA
C23H6orf222	24.1291103959021	-0.0646585794206473	0.887586246981637	5.75536730445515	0.889177944629066	0.999999999607242
C23H6orf223	71.8518378532794	-0.100663020152772	0.755295642375328	10.2162595829814	0.511045878864223	0.999999999607242
C23H6orf226	314.784966298719	0.0173529278713691	0.28380565839847	7.95841613289815	0.717023950801489	0.999999999607242
C23H6orf25	67.754446850431	0.208597106393515	0.522527617895958	11.7716009011278	0.381053897784281	0.966067901844403
C23H6orf47	867.918216034019	-0.0509466390317201	0.159688141668355	17.3869248097549	0.0969400649007032	0.48610851835739
C23H6orf52	303.790600443404	-0.161186188639228	0.295868959971856	9.17938979177825	0.605337910546166	0.999999999607242
C23H6orf62	5350.07443205341	0.00750272059376546	0.165167719499162	8.68513829592962	0.650929789333791	0.999999999607242
C23H6orf89	2451.67091267154	-0.0906303350076114	0.168702001927939	3.80316437881027	0.975325060052616	0.999999999607242
C24H18orf21	421.428945302572	-0.190898407754822	0.271964668479589	5.95691664487526	0.876223366668414	0.999999999607242
C24H18orf25	856.157695001842	-0.0316005089769056	0.187645838870082	12.8347555549943	0.304262828176002	0.881363374770201
C24H18orf32	1021.96180575105	0.0760971726431785	0.299742033722569	3.74156418972711	0.976876283527544	0.999999999607242
C24H18orf54	254.946742918731	-0.288689836276841	0.380278522895261	7.37922493202768	0.767594416775996	0.999999999607242
C24H18orf63	19.2610277788186	0.349737482586899	2.02877255063892	12.2006724139864	0.348749975288442	0.928059992711279
C24H18orf8	452.286587287433	-0.0836646766890877	0.211331522877325	4.96621408601811	0.932791772136817	0.999999999607242
C25H16orf45	13.9017596905427	0.00986061153142087	1.41818574158874	14.2356985173748	0.220224625495647	0.756726075887094
C25H16orf52	586.17329387026	-0.175467148965912	0.264269035584788	10.1920963003921	0.513195321152879	0.999999999607242
C25H16orf54	116.764144185058	0.137329727218632	0.663585744584136	14.8579313407284	0.189093733861255	0.701778909446078
C25H16orf58	674.851943297736	0.060016317179774	0.24114349148649	8.3683333303029	0.679978355900163	0.999999999607242
C25H16orf59	565.720653489799	0.100195179175661	0.358453140359161	12.0600028578025	0.359149944099455	0.941228064858275
C25H16orf62	869.770662777412	-0.2235457592439	0.168471884686492	6.77435418695586	0.817051261154101	0.999999999607242
C25H16orf71	17.4904178209796	1.27954675041417	0.870696763834407	32.8576166972074	0.000554849096723343	0.0182972154270432
C25H16orf72	2340.84875851508	-0.0387028979798151	0.221398198397239	17.1339103869019	0.103976475067193	0.505673135998803
C25H16orf89	18.6132035522641	0.513333803639576	1.09810213699842	55.4172207241736	6.49956328504062e-08	4.31471008845389e-05
C25H16orf90	7.75345904402295	0.127938452607451	1.21337714991984	7.08628847814333	0.792053235808782	NA
C25H16orf91	993.724185016059	0.129689802459383	0.216555912837583	17.8946304025737	0.0840579843076828	0.446412556661725
C25H16orf96	6.72248898804639	0.960734978825606	0.975009030083428	21.324641234546	0.0301594983288209	NA
C25H19orf33	0.231809455808188	0.935421998644938	14.3166800242213	0.303642458915078	0.999999903970282	NA
C25H7orf26	554.481963659735	0.0895097235347837	0.218832653405554	7.27624863989274	0.776291396822215	0.999999999607242
C25H7orf43	525.352707354071	-0.0186544546017962	0.25127686672396	12.6441209165147	0.317220243730237	0.893913699066759
C25H7orf61	13.2348768526388	0.126666015103683	0.916966281838002	14.4635956827411	0.208393433269521	NA
C26H10orf131	5.9878725940883	0.768098637838924	1.14516945265115	11.058645090321	0.438363336306051	NA
C26H10orf2	495.043284205327	0.0772419113127784	0.208433918385724	18.1655646132876	0.0778175844645251	0.425580325683683
C26H10orf62	12.429814247789	1.59324744026212	1.41513566978151	4.47754110412751	0.953814303750715	NA
C26H10orf76	775.793659267058	-0.0122768551815519	0.139869704788414	9.49663216261661	0.576150373811912	0.999999999607242
C27H4orf47	119.515192943813	0.214787686039886	0.411047404546481	3.53513611028859	0.981601437908851	0.999999999607242
C27H8orf4	412.777630929337	-0.0103539064517416	0.506168225281413	11.6072681816144	0.393875283885201	0.980569363891327
C27H8orf48	181.668240600719	-0.268168599206294	0.319848995424885	15.1266179415594	0.17677338265453	0.679080477324103
C28H10orf10	391.9116988466	0.0416170713183536	0.423137789953229	12.2218202996107	0.347202845957694	0.926375192646438
C28H10orf105	0.440449044788914	-1.55853423558985	8.22094976400451	1.50298331360025	0.999615918697782	NA
C28H10orf107	297.67382712311	-0.0117267823631869	0.335331176504423	7.14459455906228	0.787255928202996	0.999999999607242
C28H10orf11	25.6904945211909	0.152034401680576	0.595438312279591	12.5824282869564	0.321490938699917	0.899632555441079
C28H10orf128	63.249039213163	-1.05273212978757	0.635776211018892	21.2619661733099	0.0307563821534493	0.246244919514377
C28H10orf35	496.448256125701	-0.0206205891573168	0.289615726897461	6.04662695584659	0.870235102111279	0.999999999607242
C28H10orf54	4555.27655498614	0.0541804246283605	0.22528668498193	2.85495462519702	0.992507112189979	0.999999999607242
C28H10orf71	7.64141421676893	2.96646112881245	1.58319050022964	8.97600653128899	0.624107134321335	NA
C28H10orf99	52.3540637151972	1.43153532370673	1.77775195556157	10.5122356307518	0.484982692173559	0.999999999607242
C28H1orf131	420.321821479457	-0.213118964385786	0.251741218284766	5.32241072433385	0.91455281724019	0.999999999607242
C28H1orf198	3323.5608901542	0.0125224566680411	0.191481827408965	14.1501960318114	0.224793674121111	0.763016482857499
C29H11orf24	353.336596439243	-0.130027387124502	0.326006468333286	13.4822089107246	0.26297930093956	0.827679383568513
C29H11orf54	398.203854070657	-0.199391635263318	0.389527545194701	4.20808297252836	0.963429846443198	0.999999999607242
C29H11orf68	527.511980355244	-0.271730493926491	0.239341108695214	8.53706213544319	0.664538806701927	0.999999999607242
C29H11orf84	730.871691237191	0.165878452186958	0.319071084593082	3.48103248228506	0.98272284164219	0.999999999607242
C29H11orf95	344.542092884069	0.438840836805654	0.501436691370859	5.40710455256942	0.909860819575524	0.999999999607242
C2CD2	2550.42614208758	-0.0550440336952816	0.184574214351431	8.25392957722693	0.690392771958837	0.999999999607242
C2CD2L	554.701412849546	0.214468506123793	0.290563071125736	3.90231988865526	0.97268767842389	0.999999999607242
C2CD3	575.099627218329	0.285465520560821	0.287642139041048	5.35872395038859	0.912557573563728	0.999999999607242
C2CD4B	57.2182531966004	0.783127100856252	0.917408484909127	10.5267197198899	0.483720668355262	0.999999999607242
C2CD4C	27.9324970176224	-0.350710378093411	0.788390193689441	1.78435951358597	0.999121866192791	0.999999999607242
C2CD4D	9.51042960495516	-1.18212686571381	1.11598787539272	12.4144300586495	0.333311232978514	NA
C2CD5	1201.79585124971	-0.20230776084095	0.205062868457008	14.5809352047938	0.202496705788852	0.727918193524889
C2H2orf47	204.955836592879	0.029359991350268	0.284321294719164	1.73610419586817	0.999229506610589	0.999999999607242
C2H2orf69	264.18529773549	-0.431595316172257	0.336460388472518	13.4831776340632	0.262920694772184	0.827679383568513
C2H2orf76	406.216534217338	-0.1615911140669	0.40082321326367	5.06151225579492	0.928151013685439	0.999999999607242
C2H2orf88	14.0120948725935	0.0280733105575891	0.933273997621579	13.9068616886457	0.238190127174106	0.786435521860618
C3	10545.2765663743	0.343937442578711	0.716812009585455	13.3702620096778	0.269815504933415	0.836539539276223
C3AR1	151.390427746994	-0.273092404926161	0.88527107051375	15.7525337695441	0.150569458714913	0.624012610220523
C3H1orf109	291.518840123148	0.102361125911453	0.245271511731954	4.09201714299047	0.967147511540149	0.999999999607242
C3H1orf111	17.6215130662369	1.55319110618777	0.991799541839942	8.09938817007441	0.704374075684554	0.999999999607242
C3H1orf123	1057.63778675537	0.193575176392203	0.221213073537666	9.61993882029924	0.564862656230961	0.999999999607242
C3H1orf146	4.29864948778387	-1.16078226999508	1.26743871649652	10.7442335160815	0.464932780101782	NA
C3H1orf162	37.8911226464421	1.006818706323	1.17025589983348	8.61329929660405	0.657537863821928	0.999999999607242
C3H1orf189	17.9855261398132	1.46899047584794	0.670545737854357	15.0590820267782	0.179808075168394	0.684231501173778
C3H1orf194	5.37157582079881	-0.249442529495724	1.41520319436354	8.10285737344748	0.704061449747023	NA
C3H1orf210	215.34908768543	-0.158908004571198	0.291255658416319	11.5083381095832	0.401709517894578	0.98894683766373
C3H1orf216	211.551159234656	-0.22772940774776	0.285862768050128	7.32522879230123	0.77216747266454	0.999999999607242
C3H1orf226	487.807291621548	0.222532577826775	0.239074999609622	6.95262467841383	0.802906966803624	0.999999999607242
C3H1orf228	46.2073479802999	-0.0270988436825624	0.58902843946557	5.49715630342132	0.904725154137108	0.999999999607242
C3H1orf43	1315.50015581629	-0.0612757937537638	0.191946357891894	3.3446614239117	0.985342419257382	0.999999999607242
C3H1orf50	522.130371413352	-0.168115281963548	0.284466740684256	2.11452880089087	0.998051360628844	0.999999999607242
C3H1orf52	245.061957317602	0.0170870427460699	0.289099949316643	5.31391666436753	0.915015940517174	0.999999999607242
C3H1orf54	295.920139597543	0.191946917672558	0.52502792903177	10.8370773593313	0.457011769967798	0.999999999607242
C3H1orf56	22.4816072743899	-0.420445170212425	0.665535016288777	14.8974951287993	0.187237917074949	0.698668296467741
C3H1orf68	1570.53475414958	0.253374657399983	0.59728681668803	24.7642003868191	0.00986921968137367	0.115800633379
C4BPA	5.97875002177925	-1.19656345743999	1.69481811447656	4.14619218226193	0.965443617600447	NA
C4BPB	3.27066734988082	-2.52096022478494	1.63570103119153	6.56558969380694	0.833093730320132	NA
C4H7orf25	270.251805734778	0.0226915703218118	0.21681900594964	12.147113723229	0.352687405744301	0.933218553295514
C4H7orf31	0.494882713076353	-3.00550033289609	7.34058894486998	1.43919536555404	0.999689281940811	NA
C4H7orf49	217.924383735088	0.247110746894347	0.298407152434777	5.62613973828138	0.897109339000673	0.999999999607242
C4H7orf57	367.344186582595	0.0829914502404218	0.336397661929007	2.90538037178476	0.991918109883618	0.999999999607242
C4H7orf73	5124.45092671545	-0.112089498151111	0.341222612715427	1.9533260763767	0.998653316807851	0.999999999607242
C5	20.7849966739295	-0.725818674264439	0.80212965869734	10.7183819170758	0.467149078992552	0.999999999607242
C5AR1	173.861014972719	0.085746949543626	0.786944744098748	9.05774510429251	0.616562098432457	0.999999999607242
C5AR2	854.67174893907	-0.0548198158816057	0.494703172107134	11.9022614016582	0.371034625130105	0.955259192981148
C5H12orf10	607.530241176659	0.15290706451201	0.25232634189933	11.0281625629135	0.440906927849337	0.999999999607242
C5H12orf29	695.5111269196	0.119696174081311	0.248874691699598	4.28741405107485	0.960742915138564	0.999999999607242
C5H12orf4	218.885207963438	-0.0690465750681699	0.284798264114909	7.64589037666008	0.744629280216329	0.999999999607242
C5H12orf45	649.759757990547	-0.052309403782004	0.258379841685402	2.48622240703742	0.995926170098554	0.999999999607242
C5H12orf50	0.674620290493059	-3.27042707451123	4.31223087761611	5.22359745542153	0.919855921837814	NA
C5H12orf56	406.811445091113	-0.157881416922839	0.5926752886362	13.1941055555469	0.28082836714134	0.852103555668768
C5H12orf57	1362.07089380358	0.11384075700196	0.264215270106145	7.77452979982638	0.733347467788301	0.999999999607242
C5H12orf66	188.349551875052	-0.402937561881891	0.277272476694089	6.76570996805992	0.817726983683973	0.999999999607242
C5H12orf71	2.69091145659456	-1.11744204181284	1.65906009518126	10.3561454056547	0.498664597180769	NA
C5H12orf73	207.759032810871	0.313908569326957	0.318008632950389	10.8825676986887	0.453153273947169	0.999999999607242
C5H12orf75	295.316583719733	-0.396648686569924	0.345508520345267	14.8022770446925	0.191728916203146	0.706612859333962
C5H12orf80	1.2783976596283	-3.37301992768602	2.4232614426474	11.0426209432142	0.439699564969285	NA
C5H22orf23	36.7344545884914	-0.091509421191709	0.768160921940672	5.07928385424418	0.927266161134278	0.999999999607242
C6H4orf17	35.2550375095138	0.987575424754555	0.546035111614999	10.3075894778777	0.502949955081607	0.999999999607242
C6H4orf19	11.2529561743366	-0.304101245676541	1.25682474917303	11.310801152712	0.417604688656136	NA
C6H4orf22	1.73338973819183	-1.75553135809028	2.46042207574603	7.97446601691325	0.715589291719965	NA
C6H4orf3	3616.84055216655	-0.0801658768758159	0.233325896390935	5.30409726486278	0.915549627650611	0.999999999607242
C6H4orf32	401.265769113262	0.0833453416426672	0.341809245226826	17.5674545677738	0.0921751874678335	0.472044769171042
C6H4orf36	7.72013359222642	0.331490262765166	1.08408294887118	7.46358897048225	0.760395343085374	NA
C6H4orf48	74.7927839967531	-0.198402860743984	0.619242198296883	6.44293851856116	0.842237805432925	0.999999999607242
C7	265.24897397565	-1.37836858304788	0.825509353901634	20.4891856524798	0.0390662839205199	0.282245316227783
C7H19orf24	310.451819662804	-0.213275179555683	0.348816167617334	7.69336239893653	0.740480132406099	0.999999999607242
C7H19orf25	554.920525407852	-0.0678478262084253	0.233306171020991	17.2059154298014	0.101930490992471	0.499948927118512
C7H19orf38	10.6269922082795	-1.72604402321808	1.2062006892439	7.26291426020214	0.777409993750192	NA
C7H19orf43	1578.1123070842	-0.0451540146181064	0.248369626798233	7.35765847989921	0.769424243711297	0.999999999607242
C7H19orf44	168.738387994694	0.125469210786661	0.370222588772881	7.20971749675221	0.78185469549084	0.999999999607242
C7H19orf52	419.29324890407	0.0133276507221337	0.182135611305696	21.3222304843355	0.0301822578196888	0.243880731546402
C7H19orf53	2002.13539194075	0.0696899441379146	0.23817390817706	11.1078910940157	0.434269295030956	0.999999999607242
C7H19orf57	81.8942875704348	0.462289697243311	0.392607159428803	9.76856355925793	0.55131746800356	0.999999999607242
C7H19orf60	1132.03835911545	0.227037600426327	0.294071805042829	6.07761204846395	0.868135835277333	0.999999999607242
C7H19orf66	298.09369911794	-0.513247147843546	0.40005185258321	20.9107737663002	0.0343073375042377	0.263192794149388
C7H19orf70	1464.30807190673	0.0886990143087812	0.268762169336571	6.13566361355242	0.864160640301144	0.999999999607242
C7H19orf71	275.784317285947	-0.256163517780014	0.366905704336784	2.45331135134882	0.996162483653395	0.999999999607242
C7H1orf35	964.707513820203	0.0641763881621538	0.307491793820466	4.6665894870697	0.946232750356838	0.999999999607242
C7H5orf15	1077.98179612014	-0.140539071471732	0.298417812384607	7.58804164324124	0.749661780869248	0.999999999607242
C7H5orf24	2207.83317794167	-0.107379162812261	0.256387540679562	9.22176508970267	0.601430606788798	0.999999999607242
C7H5orf30	422.633625527649	-0.0626830644914795	0.296710655563339	9.99789846145586	0.530576196355905	0.999999999607242
C7H5orf45	212.658309234013	0.325402424423976	0.422070524794329	1.20496948878372	0.999871027633621	0.999999999607242
C7H5orf46	1233.49558952177	0.345696085490877	0.570012255187112	17.1886880156735	0.102416812361241	0.500768889902274
C7H5orf63	234.121704869636	-0.266960319767299	0.286330412749031	6.32981770896333	0.850476650737681	0.999999999607242
C8H8orf58	791.20807910458	-0.00993053529141947	0.293419395381191	8.54946669334072	0.663400601941088	0.999999999607242
C8H8orf74	0.41692146945515	-0.228085726519391	8.27938894521789	1.97450446969845	0.998583496554118	NA
C8H9orf152	261.392550371178	0.257716141652771	0.280754567853836	10.9998727846209	0.443273936232636	0.999999999607242
C8H9orf24	4.83572168783683	0.347155474268675	1.42494813888529	9.00770869554844	0.621180749196224	NA
C8H9orf3	9123.23165244246	0.00605354454670512	0.205991323956076	20.1757263446627	0.042988176594765	0.300273544324421
C8H9orf40	238.334509581873	0.0481895345687601	0.265913765918161	15.5291235844068	0.159531592761182	0.641695476825448
C8H9orf43	13.806135793162	-0.237281790215545	0.869807707435699	8.08322717694358	0.705829618806276	0.999999999607242
C8H9orf64	252.413738443332	0.0167218359705669	0.362855745692353	8.70887210150556	0.648744655032512	0.999999999607242
C8H9orf72	1037.47223848175	-0.0579910074501384	0.238776643762224	11.3844617229388	0.411638766349796	0.998864619292066
C8H9orf84	77.1537307956795	0.126819376835553	0.871267269252458	6.79338036791955	0.815560598421051	0.999999999607242
C8H9orf85	298.061949013948	0.126547508719169	0.327066620394836	5.2637338191962	0.917724226257199	0.999999999607242
C9H6orf120	482.773373915049	0.0499466254142691	0.184627431375291	11.5301931414316	0.399971459630881	0.986909383514142
C9H6orf163	11.0624968357646	0.41662058698955	1.20702632686631	4.37499355446045	0.957637514821263	NA
C9H6orf203	240.834791865674	-0.155822711204337	0.272565511544457	5.30989144904322	0.915234932417993	0.999999999607242
CA10	44.051968021562	-0.266610022106829	0.615659950228243	11.2039053127882	0.426342324155649	0.999999999607242
CA11	248.273613141717	0.342860661788915	0.430804275076203	32.1609487802542	0.000718661351615527	0.0216623323647934
CA12	4001.2740927802	0.011976009976052	0.3658517829646	3.81390550412198	0.97504777512844	0.999999999607242
CA14	2.04440589636261	-1.129266023856	1.81580473134386	8.10441421084377	0.70392113640515	NA
CA4	529.845186442486	1.04135952514945	0.899609865755617	11.6155533484651	0.393223090890889	0.980188087635508
CA5B	209.777099860472	0.0961951107554865	0.39804614586315	20.6653533206216	0.0370085439466653	0.274591726378467
CA6	204.905770353553	-0.00786489180449094	0.529483213927429	5.10934159641249	0.925755721288789	0.999999999607242
CA9	44.6822465488146	-0.086570926047505	0.498908845994824	15.0979121564019	0.178058208819364	0.681588974101179
CAAP1	590.074428518967	-0.172366947505072	0.253118637438195	9.29802010895946	0.594404611819738	0.999999999607242
CAB39	3682.7600245695	-0.141327092393449	0.201535538333595	13.9267365679138	0.237073995599017	0.7850721377678
CAB39L	330.852065173054	0.127283658189946	0.419677792513193	13.639226605081	0.253603073123653	0.812546694285178
CABLES1	561.955483131246	-0.260908521635408	0.224450457722794	9.73267111669168	0.554581880699447	0.999999999607242
CABLES2	430.420236387792	-0.0719705358030945	0.185511467092144	13.0104584002711	0.292642402786266	0.867938462894136
CABP2	2.44899372010769	2.39004706878523	2.24661093986646	11.2902629693041	0.419276186227516	NA
CABYR	268.598346545516	0.181687101252018	0.338687010905451	5.15438509645958	0.92345969299133	0.999999999607242
CACFD1	511.526971839983	0.0826085634036071	0.284748377552695	8.08732834822104	0.705460371245262	0.999999999607242
CACHD1	1001.46495442002	-0.0110839425329337	0.192012940997501	17.8288487114977	0.085637836395857	0.4516067999366
CACNA1A	55.4298669169331	-0.228921062247857	0.515417984037284	14.2230889751664	0.220893959369583	0.758014002390505
CACNA1C	262.265279386028	0.0634130179132048	0.406855373777677	26.6421896351189	0.00520251194764887	0.0769454637672832
CACNA1D	47.6160186911271	-0.326575655138932	0.673038730303601	25.7774434341219	0.00700318172917961	0.0931957722788281
CACNA1G	262.019799251929	-0.131016963340601	0.439891892392945	33.8655740969906	0.000380457311878975	0.0144960114857199
CACNA1I	20.5392500133766	-1.63317162913553	1.0646452692285	19.5141992504609	0.0524652384838821	0.337911603230739
CACNA2D1	1096.28518110999	-0.153918413684056	0.296957954184723	20.5158051234546	0.0387487804359051	0.281153961351226
CACNA2D2	106.029746478932	-0.29493314756173	0.38844192347554	12.4455748899612	0.331098934152929	0.911591578159124
CACNA2D3	169.942925465256	0.50058306674733	0.433556157954872	23.7454754649624	0.0138499978247821	0.145623308964932
CACNB1	178.290702774087	0.696587336714978	0.330116178450878	10.1061226342819	0.520867396964242	0.999999999607242
CACNB2	529.273892542475	0.0902273169567365	0.272894479268645	5.69960727547323	0.8926367702156	0.999999999607242
CACNB3	757.928438133268	-0.00994038831873443	0.231922559924583	4.72208354413624	0.94387527676086	0.999999999607242
CACNB4	59.520402101584	-0.737853397199239	0.694051598519047	11.5752371906316	0.396402406901048	0.983314967391792
CACTIN	900.370390043758	0.0551131437027126	0.216360559085384	10.2380911035503	0.509106513420802	0.999999999607242
CACUL1	1754.48311033846	-0.0670431780906409	0.187422434899521	5.9098668494189	0.87930994646326	0.999999999607242
CACYBP	1695.89157447508	0.156787115756628	0.312949957569572	3.938359169416	0.971685550853548	0.999999999607242
CAD	1241.11664254877	0.0315598117471043	0.262233164022265	14.2373914225992	0.220134881549604	0.756576673744755
CADM1	1674.50702346726	-0.0579220717296405	0.180213832158046	13.6339398175132	0.253914745814527	0.813012001654747
CADM3	599.234793240838	0.147993442862086	0.469046322617414	42.1937202500161	1.4993034423601e-05	0.00180243455289368
CADM4	172.948852755576	-0.0934980707550491	0.313471128128989	23.0386590531805	0.0174545508275489	0.17030274012634
CADPS2	524.364533245226	0.0730882858504088	0.39568024609763	22.2559137343014	0.0224639340614028	0.201312306282354
CAGE1	81.1540900311095	0.215072461880804	0.483031980047875	6.56019642151591	0.833500309767438	0.999999999607242
CALCOCO1	3103.7655698396	0.182837921965835	0.251150673551954	7.02229561587274	0.797275091985367	0.999999999607242
CALCOCO2	2537.34694469838	-0.194073456393403	0.2349190365381	29.8121157527792	0.00169585594920677	0.0370957306912335
CALCRL	728.673140311535	-0.203035057532118	0.385541341770094	26.8747234545204	0.00479968759211258	0.0736378736354339
CALD1	18206.9401724246	-0.0491391587867525	0.188614444082859	10.1161687980245	0.51996899084495	0.999999999607242
CALHM1	3.00797609407802	-0.780054583008474	1.79393493691719	15.4152526020969	0.164264598554007	NA
CALHM2	592.219961940676	0.124075064009905	0.254027972040053	14.8154547226032	0.191102358702241	0.705826046673503
CALM1	13392.7965256521	-0.109933558464382	0.201695553163252	5.78925345022594	0.887049161030453	0.999999999607242
CALM2	17818.7606444019	-0.108569507211615	0.343174329133961	7.31128161582387	0.773344155326069	0.999999999607242
CALM3	2429.50306739365	0.0427272780983995	0.192136541735123	4.95841687214454	0.933163687603921	0.999999999607242
CALML4	221.768435960236	0.535558583930168	0.294186297707115	27.1862402208942	0.00430663678713465	0.0681243879196288
CALML6	5.69841695963548	-0.658290633711571	1.32171843613446	24.6165476990156	0.0103700428840062	NA
CALN1	109.899788007655	0.473748559930118	0.672366212158627	28.3723802324781	0.00283799620674966	0.0521659366650684
CALR	14476.6685254274	-0.112329693149901	0.236158154975785	8.59934074796683	0.658820662109383	0.999999999607242
CALR3	0.795111076108691	2.7280505746942	2.96316557946594	3.9857240378492	0.970332766399329	NA
CALU	3051.68892894298	-0.128525182933039	0.35636196954325	15.6440708132675	0.154867390926786	0.63296499346349
CALY	17.7927855802139	-1.05780282054672	0.835132073102932	8.57938109488731	0.660654236854764	0.999999999607242
CAMK1	344.772777073714	0.0587191324026654	0.366415348682344	7.09838594283053	0.791060935406436	0.999999999607242
CAMK1D	1239.6343018123	0.0374497869295131	0.220694190107568	12.6654414679193	0.315753103279845	0.892548077728486
CAMK2A	10.0175469368007	-0.90121869270235	1.3891998977499	9.42440828902869	0.58277934395576	NA
CAMK2B	77.1721140341738	-0.268848216580961	0.451681976490733	9.58062513857203	0.568457035032583	0.999999999607242
CAMK2D	2150.52431430609	-0.0143057900906541	0.244340530456531	20.6617684964478	0.0370494073123853	0.274687616070348
CAMK2G	1455.80262677005	0.110736702112168	0.149871163268024	16.6476978505258	0.118737115998704	0.54563435094186
CAMK2N1	285.099150669156	0.179749333403817	0.302963367327208	29.7360391639299	0.00174302478351426	0.0375182665272651
CAMK2N2	42.4881455453384	0.107818093789311	0.572226962791772	7.53877276364915	0.753926628803295	0.999999999607242
CAMK4	84.9786190170496	-0.777783803127168	0.565720015661206	7.42079262946299	0.764055375811935	0.999999999607242
CAMKK1	955.414978564931	0.148772213936336	0.252046974977805	16.0279841351447	0.140095154873218	0.599885951110365
CAMKK2	300.604604336277	0.410182704135087	0.455622723075362	9.93776097318221	0.53599416837031	0.999999999607242
CAMKMT	73.9738588658087	-0.224995505253886	0.469652828500748	5.41779982660887	0.909258753228645	0.999999999607242
CAMKV	17.3525542540818	0.0851687061211451	0.749463076984278	13.0770768549005	0.28831758111233	0.8627533720525
CAMLG	585.355132955424	0.0331721522164249	0.218268921528324	6.33908551780564	0.849808865010783	0.999999999607242
CAMSAP1	1632.02648674239	0.194248560363451	0.237042252740021	15.8553135337283	0.146587882588085	0.61529835930699
CAMSAP2	3533.12335679047	0.0868540805483208	0.144649798745202	7.4466611743029	0.761845001485408	0.999999999607242
CAMSAP3	2632.67380575772	-0.0973682203370077	0.297229682686612	18.1408211344635	0.0783700591985279	0.427518085261249
CAMTA1	740.930045522839	-0.0113813301795648	0.222869646736646	12.2226697698146	0.347140790632166	0.926375192646438
CAMTA2	1711.60858146338	0.116556234963492	0.314703276040479	3.51819490345554	0.981957689966506	0.999999999607242
CAND1	3886.58404663246	0.0613501107196785	0.197022517896913	8.03506409083957	0.710159431182495	0.999999999607242
CAND2	190.614618549948	0.0233881618721696	0.418383814031955	7.91406751710804	0.720980257441642	0.999999999607242
CANT1	694.587706904944	-0.132349151425986	0.18901486167622	9.84801740561613	0.544107808495652	0.999999999607242
CANX	10185.4070906959	-0.0400722755337409	0.182735079284446	8.14441099177384	0.70031226425868	0.999999999607242
CAP1	7918.42951532232	0.0216496839923553	0.17242354227537	2.9384770510726	0.991514187251995	0.999999999607242
CAP2	180.376597368067	0.147217401458097	0.330196228259076	25.031174933966	0.0090213646765152	0.109295474243949
CAPG	2525.65114074047	-0.146765824466633	0.325922477413299	4.98004344734227	0.932129231077768	0.999999999607242
CAPN1	4244.5211217607	0.00504893737760677	0.174577690823379	9.5526293408127	0.571019267584099	0.999999999607242
CAPN10	473.221570287375	-0.176585598866994	0.255935184861186	14.7073899426074	0.19628845896541	0.714755021464761
CAPN11	58.4763345311411	0.338421129356074	0.755019646242576	9.03215526454994	0.61892413709211	0.999999999607242
CAPN12	1311.68954436836	-0.149528937840433	0.439721327688248	28.8130216945545	0.00242658244422476	0.0470593404351903
CAPN14	21.3428780292535	-1.17345488130806	1.66709841421466	34.4871828226555	0.000300955424486077	0.0125774591443818
CAPN15	704.424555569106	0.0777157717923717	0.319558204179511	4.23738052845636	0.962451422949923	0.999999999607242
CAPN2	3546.11016957102	-0.110865252441367	0.264696299738286	18.4261210577454	0.0722053353405913	0.407383102887096
CAPN5	532.214487027495	0.0872615998388501	0.372533317687839	5.60215065622833	0.89854870616044	0.999999999607242
CAPN6	169.516660953094	0.20536109390174	0.602097187430835	12.7847919824418	0.307623770344811	0.884636167302806
CAPN7	901.814219303156	-0.130279092029132	0.175345731089922	7.31126795885189	0.77334530659957	0.999999999607242
CAPN8	708.785500491008	0.0683604943670722	0.573673887983263	18.3943800362055	0.0728692826868577	0.409682025789956
CAPNS1	3403.51910630094	-0.144094056735507	0.253504914985719	7.46137677893671	0.76058493441667	0.999999999607242
CAPNS2	1501.81515124015	-0.330041203123071	0.364587044282515	5.76990708302151	0.888267002438824	0.999999999607242
CAPRIN1	5876.94855625424	-0.0443336861355208	0.168653605691348	4.6314440490371	0.947694763580917	0.999999999607242
CAPRIN2	733.880151336385	0.245980131092729	0.390106546081982	2.22553723421481	0.997533688157419	0.999999999607242
CAPS	109.878088928739	0.348958937752835	0.541829329474073	12.972768160904	0.295108998515077	0.871440508960824
CAPZA1	5496.94334942975	-0.100672472313756	0.25298939988029	5.78337704923592	0.887419770629143	0.999999999607242
CAPZA2	2376.88135337661	-0.0733791050591722	0.286268743147517	7.25970063924842	0.777679312587561	0.999999999607242
CAPZB	811.778725777732	0.0624462727709869	0.29816492441944	3.45326412918962	0.983280061052496	0.999999999607242
CARD10	488.24428979336	0.399703295011275	0.28539527603059	3.83003658122993	0.974627527633854	0.999999999607242
CARD11	194.088933596841	0.0637376596044809	0.478983502246092	30.0816772443644	0.00153846216671555	0.0346656096573242
CARD14	426.347599986137	-0.14894048172457	0.518443272748554	23.7130663752692	0.01399865327456	0.146434397284185
CARD19	384.732387280607	0.18873139314199	0.305638495900125	11.895204498816	0.37157174173426	0.955786626279184
CARD6	331.790319448666	-0.166746531611967	0.343723180924356	26.9592191312048	0.00466085288010422	0.0720510750328885
CARD9	170.929125939763	-0.31566704487823	0.519919285378521	17.3096442998136	0.0990442074926262	0.491000337244519
CARF	372.280499967436	0.0245302703925552	0.304285099138175	9.57680105452528	0.568806897050539	0.999999999607242
CARHSP1	2688.20482614264	-0.0123218788965612	0.209572723557654	7.88245504873419	0.72379307482458	0.999999999607242
CARM1	889.896591641779	-0.0517363920147627	0.206523479505909	3.09346581049181	0.989432076797337	0.999999999607242
CARMIL1	1112.91830897142	0.0739753809123265	0.239612957150626	8.08459649396389	0.705706342342507	0.999999999607242
CARMIL2	63.2313834217268	0.218576174410919	0.450161853936927	14.7582314293319	0.19383491782041	0.709963560919021
CARMIL3	55.0065190257545	-0.360339429113037	0.56184764171341	14.3212204479509	0.215725839205578	0.749482283552391
CARNMT1	973.812071310709	0.0850492399770619	0.276244850701891	9.42787743094402	0.582460673004587	0.999999999607242
CARNS1	14.3728222216892	0.483843992664055	0.954869161818294	13.6428803074986	0.253387839603797	0.812309456084981
CARS	2565.27821756266	-0.0316570195173312	0.247223094109443	38.1506181791895	7.37863418953339e-05	0.00480585758910741
CARS2	743.121495198745	0.110259640213539	0.282926778488407	12.346435373096	0.338174036618599	0.918986327178478
CASC1	73.4246808427344	-0.0903802751104567	0.513481644834402	16.9074688509423	0.110642590633983	0.523203045025354
CASC3	2180.6233407759	0.00472020822276864	0.129494751955175	5.71139968333193	0.891909879440301	0.999999999607242
CASC4	2290.22706992197	-0.0263247204591627	0.197014599087642	7.84726569420138	0.726916742979601	0.999999999607242
CASD1	1002.34539964054	-0.0115662984263739	0.263517744356274	5.16483788704738	0.922921309724886	0.999999999607242
CASK	1898.51479208728	-0.269875495944951	0.179011191091423	8.69301384125481	0.650204800816465	0.999999999607242
CASKIN1	57.3447883702867	0.181453478915991	0.514346330597369	9.72138138081414	0.555609602136008	0.999999999607242
CASKIN2	787.107036075254	0.166098210691954	0.311695717636322	4.80553105279262	0.94021732663257	0.999999999607242
CASP14	5600.7909473998	-0.0401353327952702	0.341955224913503	14.7397050554464	0.194726165496956	0.712070681457091
CASP2	746.582249241356	0.0116913703249002	0.165748219873136	11.7247731749791	0.384682697588061	0.970262187305603
CASP3	906.446529985845	-0.290664941067085	0.262221622410504	5.14695468141508	0.923841131265703	0.999999999607242
CASP6	671.92496528751	-0.244104920138249	0.349554332705644	5.43070429311911	0.908529486850801	0.999999999607242
CASP7	301.706949234764	-0.590754377294804	0.249418296706132	15.9991241092795	0.141163400515493	0.602046032344307
CASP8	566.37995279774	0.0742728048792736	0.39239630204949	15.0649868692451	0.179541092095745	0.683626571712457
CASP8AP2	897.658440685116	0.170130054249528	0.274814479420765	7.88647274740924	0.723435932946734	0.999999999607242
CASP9	395.271810225199	0.0708768877203518	0.218757825743689	6.07235037758187	0.868493428041152	0.999999999607242
CASQ1	10.6241055197054	-0.843682984881256	1.0818919206908	20.5275680102379	0.0386092324883873	NA
CASQ2	147.162556949684	1.26594992150927	0.813538418515427	35.3091130697895	0.000220320373633126	0.0101195450901582
CASR	61.3342941199523	0.390636707423602	0.795542891635655	6.50889726474963	0.837347077656812	0.999999999607242
CASS4	57.9059897782202	-0.148782484863858	0.63698530335724	17.6806943748888	0.0892915065878511	0.463510196603402
CAST	8075.29005169107	-0.0583630730773332	0.198933695154022	9.56318362032562	0.570053069380715	0.999999999607242
CASZ1	5084.2359575951	0.0901830714768757	0.287225507969777	17.6894267218809	0.089072439729069	0.462512126872362
CAT	3044.62979148094	-0.0099691578568369	0.285473132347016	19.2357358432671	0.056991022530074	0.356004361207543
CATSPER2	58.8750310778186	0.594018851870629	0.401856893711976	24.3972881872328	0.0111583705591196	0.125141959616896
CATSPER3	5.54385219004765	-0.598182878222679	1.28067355128291	6.86359573067205	0.810019738145933	NA
CATSPER4	225.279736141303	-0.00906744808866151	0.555272609819695	9.67125667550454	0.560177644057022	0.999999999607242
CATSPERB	6.31084852621197	-0.759617384541382	1.2516547027782	13.0597274839092	0.289439588495478	NA
CATSPERD	67.9736868139349	0.102181973402245	0.435568463338848	5.20813824111019	0.920668796943818	0.999999999607242
CATSPERG	122.181382537848	-0.0758122040238609	0.436966220865676	3.86484116822555	0.973705105001832	0.999999999607242
CAV1	5964.07565465914	-0.0169681280165475	0.369785109356192	29.4892559361806	0.00190493139424928	0.0398496872840246
CAV2	1506.28348839791	0.0183883213000327	0.360274584826262	23.3499329041965	0.0157702937959894	0.158998294418687
CBARP	514.452580284947	0.281182322677497	0.283935854762129	31.3001126662181	0.000986891982020209	0.0264089234258431
CBFA2T2	649.541686177983	0.250350262340149	0.254729716512523	11.1836067601383	0.428012034595791	0.999999999607242
CBFA2T3	512.253674246054	0.302377131566849	0.325002865936086	8.144218186393	0.700329679415847	0.999999999607242
CBFB	2317.69659663195	-0.0786146802254589	0.207762161117025	6.34166206749455	0.849622982309292	0.999999999607242
CBL	1628.45335028168	0.193765692547433	0.30603843268196	3.51899187352626	0.981941035593148	0.999999999607242
CBLB	745.137415473606	0.242782865381319	0.368887762555508	29.4418298875901	0.00193766950128816	0.0402941874605225
CBLC	276.663340741932	-0.0772848816893089	0.308287611403991	5.98207422291034	0.874557630469803	0.999999999607242
CBLL1	785.516233458993	-0.03516011612442	0.217736965631284	8.08003380755247	0.706117073294264	0.999999999607242
CBLN3	54.6173841812593	-9.55937858281637e-05	0.540245586711754	8.57485146216868	0.661070224017545	0.999999999607242
CBLN4	224.913683460371	-0.326392064361447	0.419064728407759	14.3103862713964	0.216291827892401	0.750240544498159
CBR3	764.073326406673	0.177532198990288	0.36304376803199	10.72305568126	0.466748047846154	0.999999999607242
CBR4	1160.47043035084	0.139309359472409	0.233568053161112	5.08077756490752	0.927191511341822	0.999999999607242
CBS	2570.7483391465	0.140761065669306	0.287396327212199	25.3378960052473	0.00813270413652424	0.102986407480857
CBX1	2514.07894717956	0.174334301921176	0.115584072352768	12.7411645696033	0.310578897209147	0.888178869534833
CBX2	544.53919732553	0.203138621842942	0.387129701205945	43.1242887258109	1.03330240224093e-05	0.00141546027481575
CBX3	4342.13962543968	-0.0690509854316782	0.279313909527931	6.78466870612147	0.816243714365294	0.999999999607242
CBX4	788.795794064704	0.0430067660034603	0.200814364273072	17.1862499508918	0.102485799114745	0.500822449807615
CBX5	4580.6335720426	-0.0304228252980353	0.242897037343907	6.53042339616377	0.835737433890244	0.999999999607242
CBX6	758.289295069581	0.218149364934709	0.292839146667082	9.64436505758147	0.562631684539596	0.999999999607242
CBX7	1093.12126953526	0.102350356221538	0.29445677910515	18.5860030184874	0.0689419007959547	0.396910342807931
CBX8	418.888649111914	-0.143640572404835	0.221202248343838	7.28328077575509	0.775700770678349	0.999999999607242
CBY1	180.521804710351	0.228070561802474	0.441737596257097	0.790553735724302	0.999984896290131	0.999999999607242
CC2D1A	1030.53537517641	0.0779338680893559	0.228662922849552	10.2900692814026	0.504499485177308	0.999999999607242
CC2D1B	2140.45949778531	0.00918169903084724	0.138135354127918	9.08209364494792	0.614314813920799	0.999999999607242
CC2D2A	431.843493967904	-0.149993579272471	0.295253367850699	6.85820118799302	0.810447618302059	0.999999999607242
CC2D2B	6.87304259187574	-1.18557962054705	1.25614464943668	15.3247401432637	0.168107593372739	NA
CCAR1	3598.78741689368	-0.0669650944659929	0.250318213457069	5.82419942282468	0.884832748308164	0.999999999607242
CCAR2	4392.13986524991	0.0829302560689582	0.186823653135259	11.7946750057733	0.37927315426965	0.963960336135204
CCBE1	88.4296576334089	-0.137867080422683	0.743865184627191	10.6791133440958	0.470524416226897	0.999999999607242
CCDC102A	482.875448639106	-0.0820293401435184	0.284151915871218	10.4019835566597	0.494631574565063	0.999999999607242
CCDC103	16.1794521961072	1.47285303820752	0.673471188945097	11.6130910481373	0.393416855149648	0.980188087635508
CCDC106	563.880461461806	0.0214918161620396	0.272049658690302	14.9843985691861	0.183212285440856	0.69049807889222
CCDC107	288.453091372463	0.212023879641327	0.315279535421803	16.0849725680956	0.138005506793459	0.594453468244347
CCDC110	2.04585694928152	-3.28652485307364	2.31856567886774	6.17051920369818	0.861747722155442	NA
CCDC112	399.467216489449	-0.0552192797474335	0.308296579593786	6.56526547116948	0.833118183800285	0.999999999607242
CCDC114	120.162830587229	-0.0117122917619046	0.429779235489787	24.0581358768526	0.0124903195949322	0.135586739753793
CCDC115	631.099131630801	0.0488477865880774	0.302739467860436	18.3401532963608	0.0740160983433582	0.41297030657125
CCDC117	1403.60621636134	0.196440401396183	0.181928767891826	13.0433834839381	0.290499348605234	0.86567253762332
CCDC12	1534.48035746911	0.0878468084030985	0.159371029060673	7.78595102068527	0.732340068909016	0.999999999607242
CCDC120	1312.21743722975	0.0977652530956294	0.305076113486862	6.88689910009418	0.808167261417257	0.999999999607242
CCDC121	41.5974754082025	-0.0773497118138204	0.504298003068096	8.1830008970627	0.696823134761652	0.999999999607242
CCDC124	1237.3412940407	0.0295178126116535	0.312846812959328	7.34786301817235	0.770253900159388	0.999999999607242
CCDC125	402.899478334258	-0.0632696389225508	0.264098093408255	10.6829867245367	0.47019101236141	0.999999999607242
CCDC126	187.517819375352	0.177301452637478	0.297713166154112	5.06531412309971	0.927962230130358	0.999999999607242
CCDC127	605.18822165924	-0.0725554645709269	0.175963044246692	5.93105505283029	0.877924594956406	0.999999999607242
CCDC129	251.331042931383	0.448735378598823	0.603873899740892	13.0691248380515	0.288831472711545	0.863168548196203
CCDC130	256.717005005861	0.0374667578270283	0.251248246024332	5.19099119483371	0.921565085221207	0.999999999607242
CCDC134	361.109368139408	0.048637787685148	0.251004769752453	17.5983698832612	0.09137997994967	0.470249986264551
CCDC136	97.6142547810591	-0.282866219354529	0.524846243405273	3.97530867532771	0.970633735620449	0.999999999607242
CCDC137	517.738609491417	0.197164276458629	0.271120122756844	11.5619680193724	0.39745193945553	0.984170304102087
CCDC138	566.130105953698	0.0907324649805104	0.310818407628908	7.41897662730594	0.764210319655216	0.999999999607242
CCDC14	216.938595988067	-0.0167501917342528	0.459078879487488	4.8463765890757	0.938377383738979	0.999999999607242
CCDC141	21.9840689246529	-0.70751200718035	0.914442035499582	22.2752824894825	0.0223252514674208	0.200277463787777
CCDC142	225.169683092368	-0.0157424996818486	0.397887422059804	2.10097061597367	0.99810853204757	0.999999999607242
CCDC146	105.266743207518	0.989542977116112	0.477830958792648	11.481831568663	0.403823055051226	0.991463147963608
CCDC148	8.76371071393465	-1.19702046768287	1.38162055208613	5.20163726687207	0.921009268486459	NA
CCDC149	433.687313535291	0.251572422141888	0.248634538648598	15.6104041664718	0.156221760270118	0.635740805988624
CCDC15	165.310523881556	0.0176601771648902	0.359389171467064	1.8199996731181	0.999035323443621	0.999999999607242
CCDC150	25.2112174852909	0.0866182933040895	0.630500756300342	5.4242079101744	0.908897002774309	0.999999999607242
CCDC151	19.9235062724009	0.128823686870663	0.757177736401551	11.2125929978088	0.425628712552152	0.999999999607242
CCDC152	0.643779261871273	-3.46270438989405	4.91824840556831	4.39858771762684	0.956775797412294	NA
CCDC153	4.76224353268914	-1.02821102110546	1.65016316683296	11.5414667222887	0.399076535432972	NA
CCDC154	128.004572992034	-0.112688008515204	0.54756679342678	12.5825087648187	0.32148534302209	0.899632555441079
CCDC155	605.901008571925	0.274167086772772	0.435437533621785	28.3196788860945	0.00289148446902185	0.0529798534345192
CCDC157	59.5662493716816	-0.202351594594725	0.491381769754019	6.27076848506795	0.854700615859715	0.999999999607242
CCDC158	103.916831318592	0.895028202669837	0.583995493800322	9.28204056566017	0.595876297347922	0.999999999607242
CCDC159	70.3136888485383	-0.0387343955081791	0.478854357513383	7.74925211982713	0.735573827788883	0.999999999607242
CCDC160	24.3220176516194	-0.105695266687786	1.09517057842531	17.7672106434063	0.0871417092830942	0.456469166077756
CCDC167	602.583096614319	-0.0239558821983861	0.294978839408165	7.5126946105014	0.756175847729583	0.999999999607242
CCDC169	0	NA	NA	NA	NA	NA
CCDC17	142.318217020686	0.416319596416239	0.377644713610102	10.3980747785257	0.494975003699712	0.999999999607242
CCDC171	80.3733896218901	-0.332197173163149	0.476112666581394	12.1414738761777	0.353103623763208	0.933604250329805
CCDC173	35.3916605616091	0.222278947470742	0.652575968943469	9.33685137007251	0.590829935606502	0.999999999607242
CCDC174	651.078517492995	0.000690792555799271	0.159118427909739	9.49382818074002	0.576407511156278	0.999999999607242
CCDC175	1.88669274458885	0.280727546358996	2.09544403179327	3.99740023922408	0.969993010952467	NA
CCDC178	0.0757537984614338	-0.0246731362700163	14.3166800277794	0.152714818451443	0.999999997664261	NA
CCDC18	834.696858563481	-0.015866962787104	0.265238000848578	6.5744898256072	0.832421892298858	0.999999999607242
CCDC180	5.26711948998321	1.79737769243893	1.33916455448817	10.5193682184409	0.484361052452161	NA
CCDC183	245.999903357292	0.237370507487675	0.409303816161449	13.9486309372362	0.235848987602787	0.78328911410893
CCDC184	91.1021872534461	0.122400761731299	0.666047719321254	20.1488294645369	0.0433408934298022	0.30224800832258
CCDC186	2696.87009228543	-0.0815898925062329	0.279254561637336	8.65037515587665	0.654128660187234	0.999999999607242
CCDC187	386.166198765972	0.39384078879538	0.543528232589608	5.49419256824945	0.904896566282393	0.999999999607242
CCDC189	98.2373880916221	0.209488631740143	0.456568640251346	3.67726229938444	0.97842545756116	0.999999999607242
CCDC190	67.3652437961448	-0.0556662225033646	0.627317099978503	22.4341834753225	0.0212172620803413	0.193454803754195
CCDC191	133.566915075868	0.258896868524605	0.282436885262858	11.083522747512	0.436292776695711	0.999999999607242
CCDC22	411.637675154066	-0.137030805161653	0.222336101829633	6.74352877014064	0.819456479943594	0.999999999607242
CCDC24	125.190777459962	0.160805210583464	0.43128735522804	8.9191855800733	0.629351782248388	0.999999999607242
CCDC25	2100.86239363324	-0.0482876773261086	0.137403808127308	9.58857924066479	0.567729451507314	0.999999999607242
CCDC28A	336.807490603401	0.0773711008651205	0.261934305505321	5.33000121662167	0.914137807743355	0.999999999607242
CCDC28B	339.733229234435	0.0265711167691718	0.340435662180053	2.24275245462127	0.997445123411005	0.999999999607242
CCDC3	3944.82192286502	-0.156823107993776	0.266655666504967	20.357715152878	0.0406695764560649	0.289705691139777
CCDC34	397.757723154612	-0.500571828933266	0.394456375969309	9.90572113293808	0.538887076167813	0.999999999607242
CCDC36	40.9557742639331	-0.598480552176354	0.513485537522973	29.9870212512434	0.0015920481731549	0.0355022628793975
CCDC38	19.1027132244365	0.291426019503105	0.773963746371429	13.2379086728729	0.278060692906922	0.847024212366068
CCDC39	251.363172809262	-0.0869357192721302	0.484936718447744	13.5627541519765	0.258138661124614	0.820227041791391
CCDC40	11.9192116147623	-0.281137123557796	1.05829052316612	14.8565101214647	0.189160668965463	NA
CCDC42	0.242737929496034	0.0646729685383355	8.88333068191485	0.488085815330777	0.999998791097732	NA
CCDC43	491.301901559776	0.170440020530919	0.222120514382594	7.12262493739024	0.789067888176354	0.999999999607242
CCDC47	2563.90210563202	0.127398653712772	0.174227763603088	5.83410400901948	0.884200694005431	0.999999999607242
CCDC50	448.584942670971	0.11294735987704	0.252805189244466	3.02420596230695	0.990402106270657	0.999999999607242
CCDC51	360.985697212233	0.126548298061376	0.221815969336554	16.0999566998909	0.137460405505652	0.593986256117105
CCDC53	744.60382105782	-0.0365602740773695	0.239682924113006	6.01276628872256	0.872511090543525	0.999999999607242
CCDC54	0.207596538900483	-0.985919438955609	14.3166800266882	0.201200566290282	0.999999989573323	NA
CCDC57	237.219856665747	0.0359959268111839	0.362166080470653	5.45156813853077	0.907343860796508	0.999999999607242
CCDC58	481.053616210516	-0.0369149498889806	0.372872652751188	9.26745712288584	0.597219717032046	0.999999999607242
CCDC59	639.83808519022	0.0839711626462636	0.326726663197225	5.87956010084179	0.881278186163276	0.999999999607242
CCDC6	2536.72764168514	-0.125894646254515	0.181274193144578	17.4524061033469	0.0951876144711815	0.47954997833409
CCDC61	664.303866085791	0.152635352923471	0.272389692125634	7.96952085835255	0.716031486147761	0.999999999607242
CCDC62	201.585334068099	-0.368379497132559	0.349719509493155	18.7801599466746	0.0651556720259481	0.383425468519558
CCDC65	9.43351552494796	-0.791363500917218	0.999253654771541	18.82830813941	0.064245919144845	NA
CCDC66	379.542534569777	-0.156680115087953	0.311070746845951	10.0146390420481	0.529070838890598	0.999999999607242
CCDC68	68.2294398036059	0.708629386561597	0.523615786936752	11.5335842568151	0.399702148071056	0.98670422300551
CCDC69	84.0874438666562	-0.34756246432618	0.54528478941971	22.4951136956638	0.020806180220202	0.19116559807117
CCDC7	12.919125070866	-1.23732713258255	1.55899091069873	2.54059593470322	0.995512816950765	NA
CCDC71	487.35755694005	-0.212431589830879	0.218688664230325	18.6902762142701	0.0668848146716474	0.389353086419101
CCDC71L	726.944911129113	-0.00300766529812261	0.200026032767597	10.420787649756	0.492980695927714	0.999999999607242
CCDC73	249.317109749353	0.0223368798967863	0.411161376308022	4.54529583779822	0.951176836794433	0.999999999607242
CCDC74B	15.0856989963473	1.07059596209175	0.929289580691055	10.9505079257048	0.447418862782688	0.999999999607242
CCDC77	481.137630040984	-0.183956481769231	0.198710370431188	18.2706462679081	0.075509411452149	0.418392437131329
CCDC78	60.8556541510959	0.0715082246827928	1.10456512974126	5.24059615263377	0.918956839851142	0.999999999607242
CCDC8	1314.40979042387	0.106973215257093	0.323004720552361	10.8951046828519	0.452092538451663	0.999999999607242
CCDC80	6541.66298705074	0.28661950026184	0.93817685401706	14.3221712166669	0.215676224386574	0.749460767648938
CCDC82	1136.9258867533	0.0865019337941536	0.253119969648791	10.1571866376404	0.516306061188317	0.999999999607242
CCDC84	292.379795105448	0.00844756448312658	0.244716927931811	12.345913783282	0.3382115136752	0.918986327178478
CCDC85A	125.72616681296	0.0665285446514162	0.314171707532579	31.534338310692	0.000905547907398739	0.024967662750323
CCDC85B	494.254280528996	-0.129641288495846	0.28474284902796	11.273490018959	0.420643837179277	0.999999999607242
CCDC85C	1638.88102270907	0.000792242089155641	0.301435127226666	37.2682481583363	0.000103892096358359	0.00607856807845858
CCDC86	529.388585091657	0.0955930943056594	0.22008005642723	10.8892802012198	0.452585195678739	0.999999999607242
CCDC87	0.994995920429857	1.81285765837491	3.50637274986567	7.45830543465786	0.760848085964771	NA
CCDC88A	673.125202337739	0.0825949188939127	0.338120380543562	15.4288587732542	0.163693123038525	0.651601315416267
CCDC88B	84.5703652260965	-0.69179281574851	0.728853585896048	14.9712603362951	0.183816430042202	0.691440184856437
CCDC88C	540.812820778504	-0.108156107373369	0.322676224128655	5.47600746310309	0.905944780238189	0.999999999607242
CCDC89	89.0959310180661	-0.0719669874429963	1.56770323915862	2.37555749318858	0.996680926396297	0.999999999607242
CCDC9	1138.88840256791	0.239723584705871	0.310874532490036	4.27874734239242	0.961042263258476	0.999999999607242
CCDC90B	1029.84447545984	0.030102329224833	0.305343273285626	2.45806807202985	0.996128962358129	0.999999999607242
CCDC91	891.124744428517	0.172387858306314	0.297059765603082	5.75539529980119	0.889176194248898	0.999999999607242
CCDC92	278.668890605283	-0.103219279027704	0.311902758405304	22.1018514512817	0.023595953502026	0.207987308221528
CCDC93	882.467254534686	0.0551214812612379	0.155553960058947	22.8138360292136	0.0187743947506737	0.179151406422732
CCDC94	415.34714834662	-0.0298776058681218	0.208327107569131	7.16402342652611	0.785649203698654	0.999999999607242
CCDC96	56.1936364180072	-0.0357077889397173	0.559760836673321	14.0847566316372	0.228338983469723	0.770052921978784
CCDC97	1009.94469296654	0.0778565058779942	0.213292414524894	10.3932596041876	0.495398193763991	0.999999999607242
CCER2	286.577979311322	-0.301558418662647	0.388983540062334	11.130074361257	0.432431318955842	0.999999999607242
CCHCR1	617.002018904388	0.115470591914368	0.294448345831219	14.7866886581128	0.192472187599501	0.70772687643106
CCIN	6.6069690443991	-0.863717697188277	1.35409558747837	14.4526497919504	0.20895022338839	NA
CCK	14.083491210483	-1.10766871745422	1.28367120285653	27.3098865530653	0.00412472642598504	0.0661642919261169
CCL16	7.67152700475043	1.35131197036791	1.82195642081274	9.89207963933063	0.540120074300158	NA
CCL17	1.44637331030618	-3.33492943912427	3.26609599177871	9.50667306091412	0.575229735055279	NA
CCL19	77.0534217131478	-2.241982448682	1.42903363832321	18.0213306464318	0.0810869851139348	0.436544405198539
CCL20	94.9644988007438	-0.191707358067912	1.02058901932692	6.54705709447433	0.834489128897334	0.999999999607242
CCL21	657.546947985289	-0.277461188900579	0.69394111626772	6.51085198178259	0.837201183584749	0.999999999607242
CCL22	29.3539311349273	-1.15388634905586	1.65421835086034	15.7862546010174	0.149253433499128	0.621049725697916
CCL24	174.765807746286	-0.141687483894014	0.753410832260469	8.79039553840994	0.641232763643923	0.999999999607242
CCL25	40.2874517225689	0.24592496411129	0.773607414651508	10.8810403464494	0.453282579683769	0.999999999607242
CCL26	1564.03622441534	1.23902333566657	0.559329543514204	37.6162573821966	9.0799521513287e-05	0.00565776079898676
CCL27	2168.01422179851	0.0344483892469354	0.430532337361961	21.7378466003433	0.0264846735639142	0.222414169787814
CCL28	7.59876890133654	0.200237260453882	1.54842079636316	15.3181491617488	0.168390255524465	NA
CCL5	27.3139555551841	0.607331857052175	1.20970069713251	8.12969799653922	0.701640706490996	0.999999999607242
CCM2	685.639112871818	-0.00442148481993815	0.228904614377165	4.55443502984451	0.950814269310293	0.999999999607242
CCM2L	158.935591621537	0.0786514693927555	0.390214997222716	11.1819788807491	0.428146083765647	0.999999999607242
CCNA2	621.225604266438	-0.0174242045020944	0.255372382924809	21.2074369415611	0.0312845384191595	0.248491087489505
CCNB1	777.799582124228	0.0146319410455202	0.356977247788581	33.9604267170082	0.000367119566766847	0.0142197717065866
CCNB1IP1	121.746498204248	-0.275831124777816	0.331356206145066	9.23011046703346	0.600661326542308	0.999999999607242
CCNB2	280.788175442389	0.0399771052223889	0.331642356432919	29.5304681993695	0.00187691737299192	0.0394587014102808
CCNB3	274.002001283367	-0.0527817773002163	0.306075427462123	8.04871731635717	0.708933261232345	0.999999999607242
CCNC	1612.51592102727	0.0938509560695173	0.307546982490747	7.23560206423224	0.779695584960992	0.999999999607242
CCND1	5853.88267285171	-0.10304023501207	0.157699106708706	16.7469862065393	0.115585636635161	0.537733709800987
CCND2	8037.00238979449	0.0796536211589927	0.297095360176585	9.02313841241994	0.619756456545986	0.999999999607242
CCND3	1078.72952179283	-0.120132171551078	0.346978280353686	15.3043855609021	0.168981764138918	0.662892039508675
CCNDBP1	1602.02120183146	0.00349020926284862	0.136367087076534	7.09918780901546	0.790995104961341	0.999999999607242
CCNE1	72.4060525290438	-0.171574955493028	0.431428367129549	8.16373885021733	0.698565586374713	0.999999999607242
CCNE2	199.836762141689	0.0780823308138527	0.441322918281635	10.7896364796561	0.461051585276712	0.999999999607242
CCNF	296.075497359574	0.0483590182708004	0.378820370204173	27.9212444852777	0.00332847401345083	0.057841219263714
CCNG1	4344.89570178336	0.108075514149677	0.342936251869692	11.589943448748	0.395241015897641	0.98170383283829
CCNG2	997.731546231998	-0.0362285601100058	0.242652716559446	4.61110980728608	0.948529669965146	0.999999999607242
CCNH	506.136828722781	0.0460081627192684	0.242049220943975	4.90739563825332	0.935568185522668	0.999999999607242
CCNI	5638.59969107493	0.0503105014827948	0.210192068687225	12.7393788889783	0.310700256015842	0.888178869534833
CCNJ	435.567918260467	0.142574626040565	0.402362121883994	17.5196499113731	0.0934166832403408	0.475396552584213
CCNK	518.440257411049	0.246967188748621	0.15463156055693	18.1739937339842	0.0776301641773115	0.42468989974656
CCNL1	2030.44666774291	-0.22572270756438	0.204722619595795	14.1969730468613	0.222285168606551	0.760032093928106
CCNL2	3806.86443233653	-0.0458766968978329	0.172582146293288	5.0543118606397	0.928507788057465	0.999999999607242
CCNT1	1520.00593564587	-0.0256747689208287	0.220602277612332	7.74176541580209	0.736232361130195	0.999999999607242
CCNT2	2702.54039588237	-0.127969131374428	0.223436942430607	9.75703984062579	0.552365055838821	0.999999999607242
CCNY	2753.65567041124	-0.0231166126492612	0.15467217600934	12.2930265606336	0.342025275918739	0.923379775120367
[truncated: 20,405 more rows]
